# Supplementary material
Source: publisher figshare collection journal article supplement (https://acs.figshare.com/ndownloader/files/3755770)
Supplement: Supplementary file 1 [file 3755770]

 
data_yj03-17
 
_audit_creation_method            'SHELXL-2014/7'
_shelx_SHELXL_version_number      '2014/7'
_chemical_name_systematic         ?
_chemical_name_common             ?
_chemical_melting_point           ?
_chemical_formula_moiety          ?
_chemical_formula_sum
 'C300 H300 Co6 F6 N12 O48 Ru6 S6' 
_chemical_formula_weight          6107.86

loop_
 _atom_type_symbol
 _atom_type_description
 _atom_type_scat_dispersion_real
 _atom_type_scat_dispersion_imag
 _atom_type_scat_source
 'C'  'C'   0.0033   0.0016
 'International Tables Vol C Tables 4.2.6.8 and 6.1.1.4'
 'H'  'H'   0.0000   0.0000
 'International Tables Vol C Tables 4.2.6.8 and 6.1.1.4'
 'F'  'F'   0.0171   0.0103
 'International Tables Vol C Tables 4.2.6.8 and 6.1.1.4'
 'S'  'S'   0.1246   0.1234
 'International Tables Vol C Tables 4.2.6.8 and 6.1.1.4'
 'Co'  'Co'   0.3494   0.9721
 'International Tables Vol C Tables 4.2.6.8 and 6.1.1.4'
 'Ru'  'Ru'  -1.2594   0.8363
 'International Tables Vol C Tables 4.2.6.8 and 6.1.1.4'
 'O'  'O'   0.0106   0.0060
 'International Tables Vol C Tables 4.2.6.8 and 6.1.1.4'
 'N'  'N'   0.0061   0.0033
 'International Tables Vol C Tables 4.2.6.8 and 6.1.1.4'
 
_space_group_crystal_system       monoclinic
_space_group_IT_number            3
_space_group_name_H-M_alt         'P 2'
_space_group_name_Hall            'P 2y'
 
_shelx_space_group_comment
;
The symmetry employed for this shelxl refinement is uniquely defined
by the following loop, which should always be used as a source of
symmetry information in preference to the above space-group names.
They are only intended as comments.
;
 
loop_
 _space_group_symop_operation_xyz
 'x, y, z'
 '-x, y, -z'
 
_cell_length_a                    27.4515(19)
_cell_length_b                    11.2982(10)
_cell_length_c                    37.173(3)
_cell_angle_alpha                 90
_cell_angle_beta                  90.008(5)
_cell_angle_gamma                 90
_cell_volume                      11529.5(16)
_cell_formula_units_Z             2
_cell_measurement_temperature     296(2)
_cell_measurement_reflns_used     ?
_cell_measurement_theta_min       ?
_cell_measurement_theta_max       ?
 
_exptl_crystal_description        block
_exptl_crystal_colour             ?
_exptl_crystal_density_meas       ?
_exptl_crystal_density_method     ?
_exptl_crystal_density_diffrn     1.759          
_exptl_crystal_F_000              6288
_exptl_transmission_factor_min    ?
_exptl_transmission_factor_max    ?
_exptl_crystal_size_max           ?
_exptl_crystal_size_mid           ?
_exptl_crystal_size_min           ?
_exptl_absorpt_coefficient_mu     0.951
_shelx_estimated_absorpt_T_min    ?
_shelx_estimated_absorpt_T_max    ?
_exptl_absorpt_correction_type    ?
_exptl_absorpt_correction_T_min   ?
_exptl_absorpt_correction_T_max   ?
_exptl_absorpt_process_details    ?
_exptl_absorpt_special_details    ?
_diffrn_ambient_temperature       296(2)
_diffrn_radiation_wavelength      0.71073
_diffrn_radiation_type           'MoK\a'
_diffrn_radiation_source         'sealed tube'
_diffrn_radiation_monochromator  'graphite'
_diffrn_measurement_device_type  'Bruker APEX-II CCD'
_diffrn_measurement_method       '\f and \w scans'
_diffrn_detector_area_resol_mean  ?
_diffrn_reflns_number             28021
_diffrn_reflns_av_unetI/netI      0.1674
_diffrn_reflns_av_R_equivalents   0.0955
_diffrn_reflns_limit_h_min        -22
_diffrn_reflns_limit_h_max        22
_diffrn_reflns_limit_k_min        -9
_diffrn_reflns_limit_k_max        8
_diffrn_reflns_limit_l_min        -30
_diffrn_reflns_limit_l_max        30
_diffrn_reflns_theta_min          0.742
_diffrn_reflns_theta_max          17.245
_diffrn_reflns_theta_full         17.245
_diffrn_measured_fraction_theta_max   0.913
_diffrn_measured_fraction_theta_full  0.913
_diffrn_reflns_Laue_measured_fraction_max    0.913
_diffrn_reflns_Laue_measured_fraction_full   0.913
_diffrn_reflns_point_group_measured_fraction_max   0.818
_diffrn_reflns_point_group_measured_fraction_full  0.818
_reflns_number_total              11489
_reflns_number_gt                 7536
_reflns_threshold_expression      'I > 2\s(I)'
_reflns_Friedel_coverage          0.660
_reflns_Friedel_fraction_max      0.707
_reflns_Friedel_fraction_full     0.707
 
_reflns_special_details
;
 Reflections were merged by SHELXL according to the crystal
 class for the calculation of statistics and refinement.
 
 _reflns_Friedel_fraction is defined as the number of unique
 Friedel pairs measured divided by the number that would be
 possible theoretically, ignoring centric projections and
 systematic absences.
;
 
_computing_data_collection      'Bruker APEX2'
_computing_cell_refinement      'Bruker SAINT'
_computing_data_reduction       'Bruker SAINT'  
_computing_structure_solution   'SHELXS-2014/7 (Sheldrick, 2014)'
_computing_structure_refinement 'SHELXL-2014/7 (Sheldrick, 2014)'
_computing_molecular_graphics     ?
_computing_publication_material   ?
_refine_special_details           ?
_refine_ls_structure_factor_coef  Fsqd
_refine_ls_matrix_type            full
_refine_ls_weighting_scheme       calc
_refine_ls_weighting_details
'w=1/[\s^2^(Fo^2^)+(0.2000P)^2^+0.3177P] where P=(Fo^2^+2Fc^2^)/3'
_atom_sites_solution_primary      ?
_atom_sites_solution_secondary    ?
_atom_sites_solution_hydrogens    .
_refine_ls_hydrogen_treatment     undef
_refine_ls_extinction_method      none
_refine_ls_extinction_coef        .
_refine_ls_abs_structure_details
;
 Flack x determined using 1928 quotients [(I+)-(I-)]/[(I+)+(I-)]
 (Parsons, Flack and Wagner, Acta Cryst. B69 (2013) 249-259).
;
_refine_ls_abs_structure_Flack    0.56(3)
_chemical_absolute_configuration  ?
_refine_ls_number_reflns          11489
_refine_ls_number_parameters      657
_refine_ls_number_restraints      52
_refine_ls_R_factor_all           0.2832
_refine_ls_R_factor_gt            0.2340
_refine_ls_wR_factor_ref          0.5298
_refine_ls_wR_factor_gt           0.5068
_refine_ls_goodness_of_fit_ref    1.936
_refine_ls_restrained_S_all       20.393
_refine_ls_shift/su_max           8.165
_refine_ls_shift/su_mean          0.314
 
loop_
 _atom_site_label
 _atom_site_type_symbol
 _atom_site_fract_x
 _atom_site_fract_y
 _atom_site_fract_z
 _atom_site_U_iso_or_equiv
 _atom_site_adp_type
 _atom_site_occupancy
 _atom_site_site_symmetry_order  
 _atom_site_calc_flag
 _atom_site_refinement_flags_posn
 _atom_site_refinement_flags_adp
 _atom_site_refinement_flags_occupancy
 _atom_site_disorder_assembly
 _atom_site_disorder_group
C703 C 0.2175(11) 0.684(7) 0.6816(19) 0.11(3) Uiso 1 1 d G . . . .
C706 C 0.2258(18) 0.622(6) 0.713(2) 0.7(4) Uiso 1 1 d DG . . . .
C704 C 0.260(2) 0.664(6) 0.7381(11) 1.0(4) Uiso 1 1 d G . . . .
C701 C 0.2851(17) 0.768(5) 0.7311(13) 0.01(2) Uiso 1 1 d DG . . . .
C705 C 0.277(2) 0.830(3) 0.6994(18) 0.23(5) Uiso 1 1 d G . . . .
C702 C 0.243(2) 0.788(6) 0.6746(16) 0.51(16) Uiso 1 1 d DG . . . .
C551 C 0.180(3) 0.533(6) 1.0129(10) 0.16(5) Uiso 1 1 d G . . . .
C552 C 0.211(2) 0.446(5) 0.9984(17) 0.06(3) Uiso 1 1 d DG . . . .
C553 C 0.204(2) 0.442(6) 0.9606(16) 0.05(3) Uiso 1 1 d DG . . . .
C554 C 0.167(3) 0.527(7) 0.9518(11) 0.35(13) Uiso 1 1 d G . . . .
C555 C 0.1527(17) 0.583(4) 0.9841(16) 0.00(2) Uiso 1 1 d G . . . .
C774 C -0.219(4) 0.819(7) 0.851(3) 0.36(13) Uiso 1 1 d DG . . . .
C778 C -0.208(3) 0.856(4) 0.816(4) 0.6(2) Uiso 1 1 d G . . . .
C777 C -0.234(4) 0.809(8) 0.787(2) 0.13(5) Uiso 1 1 d G . . . .
C775 C -0.270(2) 0.725(8) 0.793(2) 0.33(11) Uiso 1 1 d DG . . . .
C776 C -0.2809(16) 0.689(8) 0.828(3) 0.13(5) Uiso 1 1 d G . . . .
C772 C -0.255(4) 0.736(9) 0.8565(19) 1.5(8) Uiso 1 1 d DG . . . .
Co1 Co 0.1331(4) 0.4035(17) 0.9871(4) 0.090(6) Uani 1 1 d . . . . .
C1 C 0.375(2) 0.065(5) 0.9922(12) 0.04(3) Uiso 1 1 d G . . . .
C2 C 0.350(2) -0.027(4) 0.9756(17) 0.11(4) Uiso 1 1 d G . . . .
C3 C 0.3417(19) -0.024(4) 0.9387(17) 0.23(10) Uiso 1 1 d G . . . .
C4 C 0.3578(18) 0.072(4) 0.9186(12) 0.01(2) Uiso 1 1 d G . . . .
C5 C 0.3824(12) 0.165(3) 0.9352(9) 2.0(17) Uiso 1 1 d G . . . .
C6 C 0.3909(14) 0.161(4) 0.9721(9) 0.5(3) Uiso 1 1 d G . . . .
C7 C 0.4155(18) 0.254(5) 0.9887(10) 0.21(8) Uiso 1 1 d G . . . .
C8 C 0.4316(17) 0.350(4) 0.9685(14) 0.01(2) Uiso 1 1 d G . . . .
C9 C 0.4230(15) 0.353(3) 0.9317(14) 0.05(3) Uiso 1 1 d G . . . .
C10 C 0.3984(16) 0.261(4) 0.9150(10) 0.00(2) Uiso 1 1 d G . . . .
Ru1 Ru 0.3873(3) 0.1633(15) 1.0642(3) 0.142(6) Uani 1 1 d D . . . .
C41 C 0.0068(15) 0.570(5) 0.7997(15) 0.05(3) Uiso 1 1 d DG . . . .
C42 C -0.017(2) 0.464(5) 0.7921(15) 0.31(9) Uiso 1 1 d G . . . .
C43 C -0.067(2) 0.454(4) 0.7965(13) 0.08(3) Uiso 1 1 d G . . . .
C44 C -0.0935(15) 0.551(5) 0.8087(13) 0.01(2) Uiso 1 1 d G . . . .
C45 C -0.0699(13) 0.657(4) 0.8164(10) 0.08(3) Uiso 1 1 d G . . . .
C46 C -0.0198(13) 0.666(4) 0.8119(10) 0.23(8) Uiso 1 1 d G . . . .
C47 C 0.0037(19) 0.772(5) 0.8196(14) 0.10(4) Uiso 1 1 d DG . . . .
C48 C -0.023(3) 0.869(4) 0.8318(16) 0.09(3) Uiso 1 1 d G . . . .
C49 C -0.073(3) 0.860(4) 0.8362(19) 0.40(13) Uiso 1 1 d G . . . .
C50 C -0.0965(18) 0.754(5) 0.8286(18) 2.0(17) Uiso 1 1 d G . . . .
Ru7 Ru 0.8410(3) 0.1951(11) 0.6516(3) 0.103(4) Uani 1 1 d D . . . .
C31 C 0.5196(19) 0.494(4) 0.692(2) 2(3) Uiso 1 1 d DG . . . .
C32 C 0.492(3) 0.391(4) 0.688(3) 2(2) Uiso 1 1 d G . . . .
C33 C 0.442(3) 0.399(7) 0.684(3) 0.33(13) Uiso 1 1 d G . . . .
C34 C 0.4192(18) 0.509(8) 0.683(2) 1.0(6) Uiso 1 1 d DG . . . .
C35 C 0.4466(12) 0.611(6) 0.6876(13) 0.19(6) Uiso 1 1 d G . . . .
C36 C 0.4968(12) 0.604(4) 0.6919(9) 0.01(2) Uiso 1 1 d DG . . . .
C37 C 0.5242(14) 0.706(4) 0.6960(15) 0.31(17) Uiso 1 1 d DG . . . .
C38 C 0.501(2) 0.816(4) 0.696(2) 0.29(13) Uiso 1 1 d G . . . .
C39 C 0.451(2) 0.824(6) 0.692(3) 0.6(4) Uiso 1 1 d G . . . .
C40 C 0.4238(15) 0.721(8) 0.687(2) 0.20(8) Uiso 1 1 d DG . . . .
N1 N 0.3252(14) 0.249(5) 1.0446(12) 0.03(2) Uiso 1 1 d DG . . . .
C111 C 0.285(2) 0.184(4) 1.0344(15) 0.09(3) Uiso 1 1 d G . . . .
C112 C 0.2435(15) 0.241(6) 1.0212(16) 0.05(3) Uiso 1 1 d G . . . .
C113 C 0.2429(19) 0.364(6) 1.018(2) 2.0(16) Uiso 1 1 d DG . . . .
C114 C 0.284(3) 0.429(4) 1.029(2) 0.11(5) Uiso 1 1 d G . . . .
C115 C 0.3247(18) 0.372(5) 1.0417(17) 0.12(4) Uiso 1 1 d G . . . .
C801 C 0.6445(17) 0.575(4) 0.5109(15) 0.02(2) Uiso 1 1 d DG . . . .
C802 C 0.674(2) 0.518(6) 0.4849(9) 0.24(8) Uiso 1 1 d DG . . . .
C803 C 0.7069(17) 0.442(5) 0.5034(15) 0.01(2) Uiso 1 1 d DG . . . .
C804 C 0.6973(18) 0.452(5) 0.5408(12) 0.03(3) Uiso 1 1 d DG . . . .
C805 C 0.6588(18) 0.534(5) 0.5454(11) 0.02(2) Uiso 1 1 d G . . . .
C21 C 0.8516(15) 0.078(4) 0.5786(10) 0.01(2) Uiso 1 1 d G . . . .
C22 C 0.8355(15) -0.019(4) 0.5588(14) 0.14(5) Uiso 1 1 d G . . . .
C23 C 0.8481(16) -0.029(3) 0.5227(14) 0.10(4) Uiso 1 1 d G . . . .
C24 C 0.8766(16) 0.057(4) 0.5064(10) 0.02(2) Uiso 1 1 d G . . . .
C25 C 0.8927(10) 0.154(3) 0.5263(7) -0.001(18) Uiso 1 1 d G . . . .
C26 C 0.8801(11) 0.164(3) 0.5624(7) 0.02(2) Uiso 1 1 d G . . . .
C27 C 0.8962(16) 0.261(4) 0.5822(9) 0.12(4) Uiso 1 1 d G . . . .
C28 C 0.9247(16) 0.347(3) 0.5660(14) 0.04(3) Uiso 1 1 d G . . . .
C29 C 0.9373(14) 0.337(3) 0.5299(14) 0.03(3) Uiso 1 1 d G . . . .
C30 C 0.9213(13) 0.240(4) 0.5101(10) 0.01(2) Uiso 1 1 d G . . . .
C401 C 0.843(4) 0.079(6) 0.696(2) 0.27(17) Uiso 1 1 d G . . . .
C402 C 0.795(3) 0.117(7) 0.695(2) 0.13(5) Uiso 1 1 d G . . . .
C403 C 0.7843(19) 0.237(9) 0.6945(15) 0.07(3) Uiso 1 1 d G . . . .
C404 C 0.822(3) 0.320(6) 0.6954(19) 0.07(4) Uiso 1 1 d G . . . .
C405 C 0.870(3) 0.281(8) 0.6966(18) 0.09(4) Uiso 1 1 d G . . . .
C406 C 0.880(2) 0.161(10) 0.6970(19) 0.09(4) Uiso 1 1 d G . . . .
Ru8 Ru 0.8870(2) 0.1640(8) 0.4356(3) 0.077(3) Uani 1 1 d D . . . .
N4 N 0.792(3) 0.278(7) 0.615(2) 2.0(13) Uiso 1 1 d DG . . . .
C411 C 0.783(3) 0.399(6) 0.615(2) 0.16(5) Uiso 1 1 d G . . . .
C412 C 0.750(2) 0.447(4) 0.5912(18) 0.08(4) Uiso 1 1 d G . . . .
C413 C 0.725(2) 0.374(6) 0.5674(15) 0.04(3) Uiso 1 1 d DG . . . .
C414 C 0.733(3) 0.253(6) 0.5677(18) 0.6(3) Uiso 1 1 d G . . . .
C415 C 0.767(3) 0.205(5) 0.592(2) 0.08(3) Uiso 1 1 d G . . . .
C951 C 0.122(2) 0.204(5) 0.9765(14) 0.05(3) Uiso 1 1 d G . . . .
C953 C 0.1210(19) 0.217(5) 1.0145(13) 0.02(2) Uiso 1 1 d G . . . .
C954 C 0.089(2) 0.312(6) 1.0230(11) 0.02(2) Uiso 1 1 d G . . . .
C952 C 0.070(3) 0.358(6) 0.9903(16) 2.0(17) Uiso 1 1 d G . . . .
C584 C 0.090(2) 0.291(6) 0.9615(10) 0.03(3) Uiso 1 1 d G . . . .
C501 C 0.684(2) 0.655(7) 0.710(2) 0.09(4) Uiso 1 1 d G . . . .
C503 C 0.659(3) 0.608(5) 0.739(2) 0.08(3) Uiso 1 1 d G . . . .
C504 C 0.628(3) 0.680(8) 0.7594(15) 0.13(4) Uiso 1 1 d G . . . .
C505 C 0.622(2) 0.799(8) 0.7502(19) 0.14(5) Uiso 1 1 d DG . . . .
C506 C 0.647(3) 0.845(5) 0.721(2) 0.05(3) Uiso 1 1 d G . . . .
C502 C 0.678(2) 0.773(8) 0.7010(14) 0.06(4) Uiso 1 1 d G . . . .
Ru2 Ru 0.3406(3) 0.2012(10) 0.8487(3) 0.087(4) Uani 1 1 d D . . . .
C601 C 0.183(2) 0.629(5) 0.7886(17) 0.01(2) Uiso 1 1 d G . . . .
C602 C 0.156(2) 0.615(5) 0.7571(16) 0.15(6) Uiso 1 1 d G . . . .
C603 C 0.127(3) 0.707(7) 0.7444(15) 0.07(3) Uiso 1 1 d G . . . .
C604 C 0.125(3) 0.813(6) 0.763(2) 1.0(8) Uiso 1 1 d G . . . .
C605 C 0.152(3) 0.827(5) 0.795(2) 0.07(3) Uiso 1 1 d G . . . .
C606 C 0.181(3) 0.735(6) 0.8075(16) 2.0(16) Uiso 1 1 d G . . . .
Ru5 Ru 0.6038(3) 0.7016(12) 0.7040(2) 0.117(5) Uani 1 1 d D . . . .
C201 C 0.3813(18) 0.214(5) 0.8023(19) 2.0(16) Uiso 1 1 d G . . . .
C202 C 0.3746(17) 0.092(5) 0.8008(15) -0.001(19) Uiso 1 1 d G . . . .
C203 C 0.328(2) 0.045(5) 0.802(2) 0.6(3) Uiso 1 1 d G . . . .
C204 C 0.2878(16) 0.119(7) 0.8040(19) 0.08(4) Uiso 1 1 d G . . . .
C205 C 0.294(2) 0.241(7) 0.8055(14) 0.06(3) Uiso 1 1 d G . . . .
C206 C 0.341(3) 0.288(4) 0.805(2) 0.04(3) Uiso 1 1 d G . . . .
C807 C 0.574(5) 0.452(11) 0.522(3) 0.5(3) Uiso 1 1 d G . . . .
C806 C 0.583(4) 0.467(9) 0.484(3) 0.12(4) Uiso 1 1 d G . . . .
C833 C 0.586(4) 0.353(12) 0.468(2) 0.10(5) Uiso 1 1 d G . . . .
C818 C 0.579(4) 0.267(8) 0.496(4) 0.18(9) Uiso 1 1 d G . . . .
C595 C 0.572(4) 0.329(13) 0.529(3) 0.18(6) Uiso 1 1 d G . . . .
N2 N 0.2892(15) 0.285(5) 0.8827(12) 0.04(2) Uiso 1 1 d DG . . . .
C121 C 0.259(2) 0.205(4) 0.9003(16) 0.09(4) Uiso 1 1 d G . . . .
C391 C 0.225(2) 0.246(7) 0.9249(15) 0.09(4) Uiso 1 1 d G . . . .
C392 C 0.2208(19) 0.366(8) 0.9319(14) 0.13(5) Uiso 1 1 d DG . . . .
C393 C 0.251(3) 0.446(5) 0.914(2) 0.09(4) Uiso 1 1 d G . . . .
C372 C 0.285(2) 0.405(5) 0.8897(17) 0.38(16) Uiso 1 1 d G . . . .
Ru3 Ru 0.1045(3) 0.7086(10) 0.7954(3) 0.096(4) Uani 1 1 d D . . . .
C106 C 0.455(3) 0.118(6) 1.095(2) 2.0(19) Uiso 1 1 d G . . . .
C105 C 0.442(3) 0.235(5) 1.1009(18) 0.05(3) Uiso 1 1 d G . . . .
C104 C 0.396(3) 0.263(6) 1.113(2) 0.11(5) Uiso 1 1 d G . . . .
C103 C 0.362(3) 0.174(9) 1.120(3) 0.35(11) Uiso 1 1 d G . . . .
C102 C 0.375(3) 0.056(8) 1.114(2) 0.19(7) Uiso 1 1 d G . . . .
C101 C 0.422(4) 0.028(5) 1.102(2) 0.07(3) Uiso 1 1 d G . . . .
Ru6 Ru 0.3053(3) 0.6348(14) 0.6820(3) 0.145(6) Uani 1 1 d D . . . .
N7 N 0.3205(15) 0.601(6) 0.6283(7) 0.014(18) Uiso 1 1 d DG . . . .
C711 C 0.324(2) 0.681(4) 0.6001(16) 0.06(3) Uiso 1 1 d G . . . .
C712 C 0.324(2) 0.641(8) 0.5648(11) 0.08(4) Uiso 1 1 d G . . . .
C713 C 0.322(3) 0.520(9) 0.5576(11) 0.20(7) Uiso 1 1 d G . . . .
C714 C 0.319(3) 0.440(5) 0.586(2) 0.33(11) Uiso 1 1 d G . . . .
C715 C 0.318(2) 0.480(5) 0.6212(16) 0.06(3) Uiso 1 1 d G . . . .
O3 O 0.351(2) 0.089(8) 0.8911(19) 0.30(10) Uani 1 1 d D . . . .
N8 N -0.176(2) 0.581(8) 0.8708(9) 0.10(3) Uiso 1 1 d DG . . . .
C815 C -0.184(3) 0.684(6) 0.890(2) 0.15(5) Uiso 1 1 d G . . . .
C814 C -0.188(3) 0.679(5) 0.927(2) 0.35(12) Uiso 1 1 d G . . . .
C813 C -0.185(2) 0.571(7) 0.9452(9) 0.03(2) Uiso 1 1 d G . . . .
C812 C -0.177(2) 0.468(5) 0.9257(15) 0.06(3) Uiso 1 1 d G . . . .
C811 C -0.173(2) 0.473(6) 0.8885(14) 0.07(4) Uiso 1 1 d G . . . .
O8 O 0.873(3) 0.248(10) 0.6047(16) 0.22(5) Uiso 1 1 d D . . . .
C613 C 0.1337(19) 0.584(5) 0.9190(8) 0.19(7) Uiso 1 1 d G . . . .
C614 C 0.1263(19) 0.703(5) 0.9108(12) 0.03(2) Uiso 1 1 d G . . . .
C615 C 0.1151(18) 0.737(4) 0.8758(15) 0.01(2) Uiso 1 1 d G . . . .
N6 N 0.1113(19) 0.652(6) 0.8490(8) 0.08(3) Uiso 1 1 d DG . . . .
C611 C 0.119(2) 0.533(5) 0.8571(11) 0.18(6) Uiso 1 1 d G . . . .
C612 C 0.1299(19) 0.499(4) 0.8921(14) -0.001(19) Uiso 1 1 d G . . . .
O7 O 0.8403(19) 0.063(4) 0.6143(11) 0.049(18) Uiso 1 1 d D . . . .
N5 N 0.6149(19) 0.648(7) 0.6500(9) 0.10(3) Uiso 1 1 d DG . . . .
C515 C 0.624(2) 0.731(4) 0.6230(19) 0.07(3) Uiso 1 1 d G . . . .
C514 C 0.6333(19) 0.693(5) 0.5882(14) 0.09(3) Uiso 1 1 d G . . . .
C513 C 0.6339(16) 0.572(6) 0.5803(9) 0.00(2) Uiso 1 1 d G . . . .
C512 C 0.625(2) 0.490(4) 0.6072(18) 0.07(3) Uiso 1 1 d G . . . .
C511 C 0.616(2) 0.528(6) 0.6421(13) 0.05(3) Uiso 1 1 d G . . . .
O5 O 0.847(2) 0.089(5) 0.4804(12) 0.12(2) Uiso 1 1 d D . . . .
C304 C 0.880(2) 0.040(6) 0.3929(19) 0.7(5) Uiso 1 1 d G . . . .
C305 C 0.8692(18) 0.157(7) 0.3844(18) 0.06(3) Uiso 1 1 d G . . . .
C306 C 0.905(3) 0.242(5) 0.3873(17) 0.26(10) Uiso 1 1 d G . . . .
C301 C 0.952(2) 0.211(6) 0.3987(16) 0.04(3) Uiso 1 1 d G . . . .
C302 C 0.9621(16) 0.094(6) 0.4071(14) 0.08(3) Uiso 1 1 d G . . . .
C303 C 0.926(2) 0.008(5) 0.4042(17) 0.03(2) Uiso 1 1 d G . . . .
O2 O 0.4294(19) 0.267(5) 1.0304(19) 0.15(4) Uani 1 1 d D . . . .
N3 N 0.823(2) 0.246(10) 0.4555(17) 0.14(4) Uiso 1 1 d DG . . . .
C315 C 0.781(4) 0.187(7) 0.467(3) 0.18(6) Uiso 1 1 d G . . . .
C314 C 0.742(3) 0.250(13) 0.481(3) 1.6(10) Uiso 1 1 d G . . . .
C313 C 0.743(4) 0.373(13) 0.482(3) 0.4(2) Uiso 1 1 d DG . . . .
C312 C 0.785(5) 0.432(7) 0.470(3) 0.30(11) Uiso 1 1 d G . . . .
C311 C 0.824(3) 0.369(10) 0.457(2) 0.10(4) Uiso 1 1 d G . . . .
C107 C 0.489(3) 0.018(9) 1.089(3) 0.08(3) Uiso 1 1 d . . . . .
O14 O 0.3733(15) 0.721(6) 0.683(2) 0.15(3) Uiso 1 1 d D . . . .
Co2 Co 0.6349(5) 0.4017(14) 0.5135(5) 0.092(6) Uani 1 1 d . . . . .
O132 O 0.6282(19) 0.683(4) 0.5082(14) 0.071(19) Uiso 1 1 d D . . . .
O123 O 0.409(2) 0.741(7) 0.862(4) 0.24(7) Uani 1 1 d . . . . .
O39 O 0.346(2) 0.561(6) 0.8039(17) 0.11(2) Uiso 1 1 d . . . . .
O9 O 0.5489(13) 0.574(3) 0.6966(12) 0.11(3) Uiso 1 1 d D . . . .
O1 O 0.3668(18) 0.057(4) 1.0224(11) 0.08(2) Uani 1 1 d D . . . .
Ru4 Ru -0.1953(3) 0.6311(14) 0.8184(3) 0.145(6) Uani 1 1 d D . . . .
O12 O 0.049(4) 0.595(14) 0.783(3) 0.50(13) Uiso 1 1 d D . . . .
O11 O 0.0496(14) 0.812(4) 0.8158(15) 0.09(2) Uiso 1 1 d D . . . .
O16 O -0.1414(14) 0.754(4) 0.8249(13) 0.043(18) Uiso 1 1 d D . . . .
O15 O -0.1395(17) 0.512(5) 0.8126(16) 0.08(2) Uiso 1 1 d D . . . .
F5 F 0.323(4) 0.744(10) 0.857(3) 0.28(5) Uiso 1 1 d . . . . .
C108 C 0.498(3) 0.004(8) 1.053(3) 0.07(3) Uiso 1 1 d . . . . .
C109 C 0.510(4) -0.084(11) 1.115(3) 0.12(5) Uiso 1 1 d . . . . .
F4 F 0.329(3) 0.807(8) 0.818(2) 0.17(3) Uiso 1 1 d . . . . .
C557 C 0.833(4) 0.082(11) 0.387(3) 0.11(4) Uiso 1 1 d . . . . .
O81 O 0.3454(15) 0.685(5) 0.8274(12) 0.022(14) Uiso 1 1 d . . . . .
C586 C 0.408(3) 0.202(10) 0.803(2) 0.07(3) Uiso 1 1 d . . . . .
O64 O 0.8521(14) 0.648(4) 0.6754(10) 0.009(12) Uiso 1 1 d . . . . .
C640 C 0.564(4) 0.247(10) 0.806(3) 0.11(4) Uiso 1 1 d . . . . .
S12 S 0.8333(14) 0.759(4) 0.707(3) 0.36(6) Uani 1 1 d . . . . .
O181 O 0.850(3) 0.676(8) 0.6340(19) 0.14(3) Uiso 1 1 d . . . . .
C507 C 0.604(12) 0.87(3) 0.782(6) 0.4(2) Uiso 1 1 d D . . . .
S7 S 0.885(2) 0.641(6) 0.3912(18) 0.25(3) Uiso 1 1 d . . . . .
S8 S 0.3314(19) 0.137(5) 0.6199(15) 0.22(2) Uiso 1 1 d . . . . .
O103 O 0.327(2) 0.149(6) 0.5813(16) 0.08(2) Uiso 1 1 d . . . . .
O151 O 0.404(3) 0.093(7) 0.6283(19) 0.12(3) Uiso 1 1 d . . . . .
O161 O 0.368(4) 0.012(10) 0.590(3) 0.23(4) Uiso 1 1 d . . . . .
O114 O 0.430(4) 0.779(10) 0.830(3) 0.20(5) Uiso 1 1 d . . . . .
O115 O 0.908(6) 0.621(15) 0.430(5) 0.37(8) Uiso 1 1 d . . . . .
O116 O 0.823(4) 0.242(9) 0.364(2) 0.19(4) Uiso 1 1 d . . . . .
S9 S 0.8373(13) 0.090(8) 0.8794(18) 0.28(4) Uani 1 1 d . . . . .
O119 O 0.957(4) 0.676(12) 0.382(3) 0.23(5) Uiso 1 1 d . . . . .
O118 O 0.654(4) 0.359(10) 0.764(3) 0.20(4) Uiso 1 1 d . . . . .
C754 C 0.407(4) 0.152(11) 0.672(3) 0.11(4) Uiso 1 1 d . . . . .
C452 C 0.919(4) 0.743(12) 0.726(3) 0.12(5) Uiso 1 1 d . . . . .
C451 C 0.846(4) 0.041(14) 0.700(3) 0.07(6) Uiso 1 1 d . . . . .
O131 O 0.887(3) 0.751(7) 0.355(2) 0.14(3) Uiso 1 1 d . . . . .
C91 C 0.454(6) 0.039(14) 0.736(4) 0.17(6) Uiso 1 1 d . . . . .
O183 O 0.823(4) -0.015(9) 0.875(3) 0.15(4) Uiso 1 1 d . . . . .
C651 C 0.341(4) 0.847(10) 0.771(3) 0.11(4) Uiso 1 1 d . . . . .
C436 C 0.994(5) 0.919(13) 0.441(4) 0.20(6) Uiso 1 1 d . . . . .
C437 C 0.965(5) 0.125(13) 0.628(3) 0.16(6) Uiso 1 1 d . . . . .
O6 O 0.915(2) 0.245(6) 0.4802(12) 0.11(3) Uiso 1 1 d D . . . .
C558 C 0.904(3) 0.571(7) 0.657(2) 0.03(3) Uiso 1 1 d . . . . .
F14 F 0.941(4) 0.754(10) 0.677(3) 0.24(5) Uiso 1 1 d . . . . .
F15 F 0.970(5) 0.689(15) 0.530(3) 0.36(6) Uiso 1 1 d . . . . .
F16 F 0.902(3) 0.639(9) 0.698(3) 0.21(4) Uiso 1 1 d . . . . .
O4 O 0.3876(15) 0.298(4) 0.8805(12) 0.035(17) Uiso 1 1 d D . . . .
O83 O 0.477(5) 0.047(13) 0.669(4) 0.29(6) Uiso 1 1 d . . . . .
O10 O 0.5453(16) 0.822(3) 0.700(2) 2.0(14) Uiso 1 1 d D . . . .
O13 O 0.349(3) 0.402(15) 0.666(5) 1.5(10) Uiso 1 1 d D . . . .
O551 O 0.122(2) 0.675(6) 0.9901(14) 0.08(2) Uiso 1 1 d . . . . .
C556 C 0.375(2) 0.677(7) 0.1011(16) 0.02(2) Uiso 1 1 d . . . . .
 
loop_
 _atom_site_aniso_label
 _atom_site_aniso_U_11
 _atom_site_aniso_U_22
 _atom_site_aniso_U_33
 _atom_site_aniso_U_23
 _atom_site_aniso_U_13
 _atom_site_aniso_U_12
Co1 0.004(8) 0.171(17) 0.096(14) 0.000(12) 0.020(8) -0.015(9)
Ru1 0.026(6) 0.273(17) 0.128(10) 0.022(12) 0.010(6) 0.036(9)
Ru7 0.032(5) 0.160(11) 0.117(8) -0.003(9) 0.001(5) 0.020(7)
Ru8 0.018(5) 0.012(6) 0.201(10) -0.019(7) 0.015(5) 0.013(4)
Ru2 0.027(5) 0.087(9) 0.147(10) 0.007(8) 0.021(5) 0.007(6)
Ru5 0.051(6) 0.205(13) 0.094(8) 0.021(9) -0.007(5) -0.087(8)
Ru3 0.051(6) 0.117(10) 0.121(9) 0.009(8) 0.004(6) -0.022(7)
Ru6 0.023(6) 0.289(18) 0.123(9) 0.020(10) 0.015(6) -0.047(8)
O3 0.10(7) 0.7(3) 0.09(6) 0.21(10) -0.07(6) -0.26(12)
O2 0.03(4) 0.08(6) 0.33(12) 0.03(6) 0.10(6) 0.02(4)
Co2 0.024(9) 0.076(13) 0.176(18) -0.006(12) -0.002(10) 0.006(9)
O123 0.01(4) 0.09(8) 0.61(19) 0.19(10) -0.10(8) -0.03(4)
O1 0.04(4) 0.13(7) 0.07(6) 0.07(5) 0.05(4) 0.03(4)
Ru4 0.022(6) 0.298(19) 0.114(9) 0.020(10) 0.007(6) -0.026(9)
S12 0.06(3) 0.06(4) 0.96(17) 0.14(6) 0.02(6) 0.05(3)
S9 0.03(2) 0.40(11) 0.41(8) 0.13(8) -0.09(3) -0.04(4)
 
_geom_special_details
;
 All esds (except the esd in the dihedral angle between two l.s. planes)
 are estimated using the full covariance matrix.  The cell esds are taken
 into account individually in the estimation of esds in distances, angles
 and torsion angles; correlations between esds in cell parameters are only
 used when they are defined by crystal symmetry.  An approximate (isotropic)
 treatment of cell esds is used for estimating esds involving l.s. planes.
;
 
loop_
 _geom_bond_atom_site_label_1
 _geom_bond_atom_site_label_2
 _geom_bond_distance
 _geom_bond_site_symmetry_2
 _geom_bond_publ_flag
C703 C706 1.3900 . ?
C703 C702 1.3900(10) . ?
C703 Ru6 2.48(3) . ?
C706 C704 1.3900 . ?
C706 Ru6 2.48(3) . ?
C704 C701 1.3900(11) . ?
C704 Ru6 2.46(3) . ?
C701 C705 1.3900 . ?
C701 Ru6 2.43(2) . ?
C705 C702 1.3900 . ?
C705 Ru6 2.43(3) . ?
C702 Ru6 2.45(3) . ?
C551 C555 1.4200 . ?
C551 C552 1.4200 . ?
C551 C813 1.6(3) 2_557 ?
C551 Co1 2.17(7) . ?
C552 C553 1.4200 . ?
C552 C113 1.47(3) . ?
C552 Co1 2.24(6) . ?
C553 C554 1.4200 . ?
C553 C392 1.44(3) . ?
C553 Co1 2.21(7) . ?
C554 C555 1.4200 . ?
C554 C613 1.67(5) . ?
C554 Co1 2.13(8) . ?
C555 O551 1.35(7) . ?
C555 Co1 2.10(6) . ?
C774 C778 1.3900 . ?
C774 C772 1.3900(15) . ?
C774 Ru4 2.53(3) . ?
C778 C777 1.3900 . ?
C778 Ru4 2.56(5) . ?
C777 C775 1.3900(16) . ?
C777 Ru4 2.55(4) . ?
C775 C776 1.3900 . ?
C775 Ru4 2.50(3) . ?
C776 C772 1.3900(14) . ?
C776 Ru4 2.46(3) . ?
C772 Ru4 2.47(3) . ?
Co1 C952 1.81(9) . ?
Co1 C584 1.97(7) . ?
Co1 C954 2.08(6) . ?
Co1 C951 2.31(6) . ?
Co1 C953 2.36(5) . ?
C1 O1 1.15(5) . ?
C1 C2 1.3900 . ?
C1 C6 1.3900 . ?
C2 C3 1.3900 . ?
C3 C4 1.3900 . ?
C4 O3 1.05(6) . ?
C4 C5 1.3900 . ?
C5 C6 1.3900 . ?
C5 C10 1.3900 . ?
C6 C7 1.3900 . ?
C7 C8 1.3900 . ?
C7 O2 1.60(8) . ?
C8 C9 1.3900 . ?
C9 C10 1.3900 . ?
C10 O4 1.38(5) . ?
Ru1 O1 2.04(3) . ?
Ru1 O2 2.07(3) . ?
Ru1 N1 2.09(2) . ?
Ru1 C105 2.19(6) . ?
Ru1 C104 2.16(7) . ?
Ru1 C106 2.25(8) . ?
Ru1 C103 2.18(9) . ?
Ru1 C101 2.27(7) . ?
Ru1 C102 2.23(8) . ?
C41 O12 1.34(3) . ?
C41 C42 1.3900 . ?
C41 C46 1.3900 . ?
C42 C43 1.3900 . ?
C43 C44 1.3900 . ?
C44 O15 1.35(6) . ?
C44 C45 1.3900 . ?
C45 C46 1.3900 . ?
C45 C50 1.3900 . ?
C46 C47 1.3900 . ?
C47 C48 1.3900 . ?
C47 O11 1.34(3) . ?
C48 C49 1.3900 . ?
C49 C50 1.3900 . ?
C50 O16 1.24(6) . ?
Ru7 C406 2.04(6) . ?
Ru7 O7 2.04(2) . ?
Ru7 O8 2.04(3) . ?
Ru7 C405 2.09(6) . ?
Ru7 C401 2.11(8) . ?
Ru7 N4 2.13(2) . ?
Ru7 C404 2.21(7) . ?
Ru7 C402 2.23(7) . ?
Ru7 C403 2.28(5) . ?
Ru7 C451 2.52(15) . ?
C31 O9 1.22(2) . ?
C31 C32 1.3900 . ?
C31 C36 1.3900 . ?
C32 C33 1.3900 . ?
C33 C34 1.3900 . ?
C34 C35 1.3900 . ?
C34 O13 2.37(11) . ?
C35 C36 1.3900 . ?
C35 C40 1.3900 . ?
C36 C37 1.3900 . ?
C37 C38 1.3900 . ?
C37 O10 1.44(3) . ?
C38 C39 1.3900 . ?
C39 C40 1.3900(10) . ?
C40 O14 1.39(3) . ?
N1 C111 1.3900 . ?
N1 C115 1.3900(10) . ?
C111 C112 1.3900 . ?
C112 C113 1.3900 . ?
C113 C114 1.3900(11) . ?
C114 C115 1.3900 . ?
C801 O132 1.30(3) . ?
C801 C805 1.4200 . ?
C801 C802 1.4200 . ?
C801 Co2 1.98(5) . ?
C802 C803 1.4200 . ?
C802 C713 1.6(3) 2_656 ?
C802 Co2 2.00(6) . ?
C803 C804 1.4200 . ?
C803 C313 1.50(2) . ?
C803 Co2 2.06(5) . ?
C804 C805 1.4200 . ?
C804 C413 1.52(2) . ?
C804 Co2 2.07(5) . ?
C805 C513 1.53(4) . ?
C805 Co2 2.02(5) . ?
C21 O7 1.37(5) . ?
C21 C22 1.3900 . ?
C21 C26 1.3900 . ?
C22 C23 1.3900 . ?
C23 C24 1.3900 . ?
C24 O5 1.32(6) . ?
C24 C25 1.3900 . ?
C25 C26 1.3900 . ?
C25 C30 1.3900 . ?
C26 C27 1.3900 . ?
C26 O8 1.85(9) . ?
C27 O8 1.06(6) . ?
C27 C28 1.3900 . ?
C28 C29 1.3900 . ?
C29 C30 1.3900 . ?
C30 O6 1.12(5) . ?
C401 C402 1.3900 . ?
C401 C406 1.3900(13) . ?
C402 C403 1.3900 . ?
C402 C451 1.67(17) . ?
C403 C404 1.3900 . ?
C404 C405 1.3900 . ?
C405 C406 1.3900 . ?
C406 C451 1.66(18) . ?
Ru8 C305 1.97(6) . ?
Ru8 O5 2.16(3) . ?
Ru8 C306 2.06(6) . ?
Ru8 C304 2.13(7) . ?
Ru8 O6 2.05(3) . ?
Ru8 N3 2.13(2) . ?
Ru8 C301 2.31(6) . ?
Ru8 C303 2.37(6) . ?
Ru8 C302 2.45(5) . ?
Ru8 C557 2.51(11) . ?
N4 C411 1.3900 . ?
N4 C415 1.3900 . ?
C411 C412 1.3900 . ?
C412 C413 1.3900 . ?
C413 C414 1.3900 . ?
C414 C415 1.3900 . ?
C951 C584 1.4200 . ?
C951 C953 1.4200 . ?
C953 C954 1.4200 . ?
C954 C952 1.4200 . ?
C952 C584 1.4200 . ?
C501 C503 1.3900 . ?
C501 C502 1.3900 . ?
C501 Ru5 2.28(6) . ?
C503 C504 1.3900 . ?
C503 Ru5 2.27(6) . ?
C504 C505 1.3900 . ?
C504 Ru5 2.18(6) . ?
C505 C506 1.3900 . ?
C505 C507 1.54(5) . ?
C505 Ru5 2.10(6) . ?
C506 C502 1.3900 . ?
C506 Ru5 2.11(6) . ?
C502 Ru5 2.20(6) . ?
Ru2 C206 1.91(7) . ?
Ru2 O3 2.04(3) . ?
Ru2 C201 2.06(7) . ?
Ru2 O4 2.06(2) . ?
Ru2 C205 2.10(5) . ?
Ru2 N2 2.12(2) . ?
Ru2 C202 2.36(5) . ?
Ru2 C204 2.39(6) . ?
Ru2 C203 2.51(6) . ?
Ru2 C586 2.51(9) . ?
C601 C602 1.3900 . ?
C601 C606 1.3900 . ?
C601 Ru3 2.35(5) . ?
C602 C603 1.3900 . ?
C602 Ru3 2.27(6) . ?
C603 C604 1.3900 . ?
C603 Ru3 2.00(7) . ?
C604 C605 1.3900 . ?
C604 Ru3 1.77(8) . ?
C605 C606 1.3900 . ?
C605 Ru3 1.87(8) . ?
C606 Ru3 2.16(7) . ?
Ru5 O10 2.11(3) . ?
Ru5 O9 2.11(2) . ?
Ru5 N5 2.12(2) . ?
C201 C586 0.75(10) . ?
C201 C202 1.3900 . ?
C201 C206 1.3900 . ?
C202 C203 1.3900 . ?
C202 C586 1.55(11) . ?
C203 C204 1.3900 . ?
C204 C205 1.3900(10) . ?
C205 C206 1.3900 . ?
C807 C806 1.4200 . ?
C807 C595 1.4200 . ?
C807 Co2 1.78(14) . ?
C806 C833 1.4200 . ?
C806 Co2 1.94(10) . ?
C833 C818 1.4200 . ?
C833 Co2 2.22(9) . ?
C818 C595 1.4200 . ?
C818 Co2 2.25(11) . ?
C595 Co2 1.99(11) . ?
N2 C121 1.3900 . ?
N2 C372 1.3900 . ?
C121 C391 1.3900 . ?
C391 C392 1.3900 . ?
C392 C393 1.3900(12) . ?
C393 C372 1.3900 . ?
Ru3 O12 2.05(3) . ?
Ru3 O11 2.05(2) . ?
Ru3 N6 2.10(2) . ?
C106 C105 1.3900 . ?
C106 C101 1.3900 . ?
C106 C107 1.48(12) . ?
C105 C104 1.3900 . ?
C104 C103 1.3900(18) . ?
C103 C102 1.3900 . ?
C102 C101 1.3900 . ?
C101 C107 1.90(14) . ?
Ru6 N7 2.07(2) . ?
Ru6 O14 2.11(3) . ?
Ru6 O13 2.95(9) . ?
N7 C711 1.3900 . ?
N7 C715 1.3900 . ?
C711 C712 1.3900 . ?
C712 C713 1.3900 . ?
C713 C714 1.3900 . ?
C713 C802 1.6(4) 2_656 ?
C714 C715 1.3900 . ?
N8 C815 1.3900 . ?
N8 C811 1.3900 . ?
N8 Ru4 2.09(2) . ?
C815 C814 1.3900 . ?
C814 C813 1.3900 . ?
C813 C812 1.3900 . ?
C813 C551 1.62(5) 2_557 ?
C812 C811 1.3900 . ?
C613 C614 1.3900 . ?
C613 C612 1.3900 . ?
C614 C615 1.3900 . ?
C615 N6 1.3900 . ?
N6 C611 1.3900 . ?
C611 C612 1.3900 . ?
N5 C515 1.3900 . ?
N5 C511 1.3900 . ?
C515 C514 1.3900 . ?
C514 C513 1.3900 . ?
C513 C512 1.3900 . ?
C512 C511 1.3900 . ?
C304 C557 1.37(14) . ?
C304 C305 1.3900 . ?
C304 C303 1.3900 . ?
C305 C557 1.29(12) . ?
C305 C306 1.3900 . ?
C305 O116 1.78(10) . ?
C306 C301 1.3900 . ?
C301 C302 1.3900 . ?
C302 C303 1.3900 . ?
N3 C315 1.3900 . ?
N3 C311 1.3900 . ?
C315 C314 1.3900 . ?
C314 C313 1.3900(12) . ?
C313 C312 1.3900(10) . ?
C312 C311 1.3900 . ?
C107 C108 1.38(10) . ?
C107 C109 1.61(14) . ?
O123 O114 1.36(12) . ?
O39 O81 1.66(8) . ?
Ru4 O16 2.04(2) . ?
Ru4 O15 2.05(3) . ?
F5 O81 1.41(11) . ?
F5 F4 1.62(11) . ?
F4 O81 1.50(9) . ?
F4 C651 1.83(13) . ?
O64 O181 1.57(7) . ?
O64 F16 1.62(9) . ?
O64 S12 1.79(8) . ?
O64 C558 1.80(9) . ?
S7 O115 1.57(16) . ?
S7 O131 1.84(9) . ?
S7 O119 2.04(12) . ?
S8 O103 1.45(6) . ?
S8 O161 2.06(11) . ?
S8 O151 2.08(8) . ?
O151 C754 1.76(12) . ?
O151 O161 1.96(11) . ?
S9 O183 1.26(10) . ?
C452 F16 1.63(13) . ?
C452 F14 1.90(14) . ?
C558 F16 1.71(11) . ?
 
loop_
 _geom_angle_atom_site_label_1
 _geom_angle_atom_site_label_2
 _geom_angle_atom_site_label_3
 _geom_angle
 _geom_angle_site_symmetry_1
 _geom_angle_site_symmetry_3
 _geom_angle_publ_flag
C706 C703 C702 120.0 . . ?
C706 C703 Ru6 73.8(9) . . ?
C702 C703 Ru6 72.7(9) . . ?
C704 C706 C703 120.00(7) . . ?
C704 C706 Ru6 72.8(8) . . ?
C703 C706 Ru6 73.6(8) . . ?
C701 C704 C706 120.0 . . ?
C701 C704 Ru6 72.5(8) . . ?
C706 C704 Ru6 74.5(8) . . ?
C705 C701 C704 120.00(5) . . ?
C705 C701 Ru6 73.3(9) . . ?
C704 C701 Ru6 74.5(9) . . ?
C701 C705 C702 120.00(7) . . ?
C701 C705 Ru6 73.5(9) . . ?
C702 C705 Ru6 74.3(8) . . ?
C705 C702 C703 120.0 . . ?
C705 C702 Ru6 72.6(8) . . ?
C703 C702 Ru6 74.6(9) . . ?
C555 C551 C552 108.0 . . ?
C555 C551 C813 132(10) . 2_557 ?
C552 C551 C813 120(10) . 2_557 ?
C555 C551 Co1 68(3) . . ?
C552 C551 Co1 74(2) . . ?
C813 C551 Co1 131(10) 2_557 . ?
C553 C552 C551 108.0 . . ?
C553 C552 C113 124(6) . . ?
C551 C552 C113 127(6) . . ?
C553 C552 Co1 71(3) . . ?
C551 C552 Co1 69(2) . . ?
C113 C552 Co1 122(5) . . ?
C554 C553 C552 108.0 . . ?
C554 C553 C392 117(6) . . ?
C552 C553 C392 135(6) . . ?
C554 C553 Co1 68(2) . . ?
C552 C553 Co1 72(3) . . ?
C392 C553 Co1 120(5) . . ?
C553 C554 C555 108.0 . . ?
C553 C554 C613 145(5) . . ?
C555 C554 C613 106(5) . . ?
C553 C554 Co1 74(2) . . ?
C555 C554 Co1 69(3) . . ?
C613 C554 Co1 117(5) . . ?
O551 C555 C551 120(6) . . ?
O551 C555 C554 131(6) . . ?
C551 C555 C554 108.0 . . ?
O551 C555 Co1 125(4) . . ?
C551 C555 Co1 73(3) . . ?
C554 C555 Co1 72(3) . . ?
C778 C774 C772 120.00(8) . . ?
C778 C774 Ru4 75.7(13) . . ?
C772 C774 Ru4 71.9(14) . . ?
C777 C778 C774 120.00(9) . . ?
C777 C778 Ru4 73.8(7) . . ?
C774 C778 Ru4 72.6(10) . . ?
C778 C777 C775 120.00(7) . . ?
C778 C777 Ru4 74.7(9) . . ?
C775 C777 Ru4 72.1(13) . . ?
C776 C775 C777 120.00(10) . . ?
C776 C775 Ru4 72.2(12) . . ?
C777 C775 Ru4 76.0(15) . . ?
C775 C776 C772 120.00(15) . . ?
C775 C776 Ru4 75.3(12) . . ?
C772 C776 Ru4 74.1(7) . . ?
C776 C772 C774 120.0 . . ?
C776 C772 Ru4 73.2(9) . . ?
C774 C772 Ru4 75.9(14) . . ?
C952 Co1 C584 43.9(16) . . ?
C952 Co1 C954 42.2(14) . . ?
C584 Co1 C954 69.1(18) . . ?
C952 Co1 C555 122(2) . . ?
C584 Co1 C555 138(2) . . ?
C954 Co1 C555 132(2) . . ?
C952 Co1 C551 137(3) . . ?
C584 Co1 C551 177(2) . . ?
C954 Co1 C551 113(2) . . ?
C555 Co1 C551 38.8(10) . . ?
C952 Co1 C554 131(2) . . ?
C584 Co1 C554 113(2) . . ?
C954 Co1 C554 168(2) . . ?
C555 Co1 C554 39.2(12) . . ?
C551 Co1 C554 64.6(13) . . ?
C952 Co1 C552 165(3) . . ?
C584 Co1 C552 143(3) . . ?
C954 Co1 C552 123(2) . . ?
C555 Co1 C552 63.9(13) . . ?
C551 Co1 C552 37.6(11) . . ?
C554 Co1 C552 63.4(13) . . ?
C952 Co1 C553 157(3) . . ?
C584 Co1 C553 115(2) . . ?
C954 Co1 C553 153(2) . . ?
C555 Co1 C553 64.2(15) . . ?
C551 Co1 C553 63.2(12) . . ?
C554 Co1 C553 38.1(12) . . ?
C552 Co1 C553 37.2(9) . . ?
C952 Co1 C951 66.6(15) . . ?
C584 Co1 C951 37.7(10) . . ?
C954 Co1 C951 62.9(12) . . ?
C555 Co1 C951 165(2) . . ?
C551 Co1 C951 145(2) . . ?
C554 Co1 C951 126(2) . . ?
C552 Co1 C951 112(2) . . ?
C553 Co1 C951 103.4(19) . . ?
C952 Co1 C953 65.3(14) . . ?
C584 Co1 C953 63.2(13) . . ?
C954 Co1 C953 36.6(8) . . ?
C555 Co1 C953 157(2) . . ?
C551 Co1 C953 120(2) . . ?
C554 Co1 C953 155(2) . . ?
C552 Co1 C953 104.2(18) . . ?
C553 Co1 C953 119(2) . . ?
C951 Co1 C953 35.3(8) . . ?
O1 C1 C2 106(4) . . ?
O1 C1 C6 131(4) . . ?
C2 C1 C6 120.0 . . ?
C3 C2 C1 120.00(6) . . ?
C4 C3 C2 120.0 . . ?
O3 C4 C3 127(5) . . ?
O3 C4 C5 112(5) . . ?
C3 C4 C5 120.0 . . ?
C6 C5 C4 120.00(5) . . ?
C6 C5 C10 120.00(6) . . ?
C4 C5 C10 120.0 . . ?
C7 C6 C5 120.0 . . ?
C7 C6 C1 120.0 . . ?
C5 C6 C1 120.00(7) . . ?
C6 C7 C8 120.0 . . ?
C6 C7 O2 128(3) . . ?
C8 C7 O2 112(3) . . ?
C9 C8 C7 120.00(7) . . ?
C8 C9 C10 120.00(5) . . ?
O4 C10 C9 107(3) . . ?
O4 C10 C5 132(3) . . ?
C9 C10 C5 120.0 . . ?
O1 Ru1 O2 92(3) . . ?
O1 Ru1 N1 78(2) . . ?
O2 Ru1 N1 89(2) . . ?
O1 Ru1 C105 152(3) . . ?
O2 Ru1 C105 77(3) . . ?
N1 Ru1 C105 127(3) . . ?
O1 Ru1 C104 169(3) . . ?
O2 Ru1 C104 99(4) . . ?
N1 Ru1 C104 98(2) . . ?
C105 Ru1 C104 37.3(10) . . ?
O1 Ru1 C106 119(2) . . ?
O2 Ru1 C106 89(3) . . ?
N1 Ru1 C106 163(3) . . ?
C105 Ru1 C106 36.5(11) . . ?
C104 Ru1 C106 66.2(13) . . ?
O1 Ru1 C103 132(3) . . ?
O2 Ru1 C103 136(4) . . ?
N1 Ru1 C103 93(3) . . ?
C105 Ru1 C103 66.8(15) . . ?
C104 Ru1 C103 37.4(13) . . ?
C106 Ru1 C103 77.8(13) . . ?
O1 Ru1 C101 101(2) . . ?
O2 Ru1 C101 121(3) . . ?
N1 Ru1 C101 150(3) . . ?
C105 Ru1 C101 65.3(16) . . ?
C104 Ru1 C101 77.8(13) . . ?
C106 Ru1 C101 35.8(12) . . ?
C103 Ru1 C101 65.5(16) . . ?
O1 Ru1 C102 106(3) . . ?
O2 Ru1 C102 153(3) . . ?
N1 Ru1 C102 115(3) . . ?
C105 Ru1 C102 77.8(13) . . ?
C104 Ru1 C102 66.4(18) . . ?
C106 Ru1 C102 65.0(16) . . ?
C103 Ru1 C102 36.7(13) . . ?
C101 Ru1 C102 35.9(11) . . ?
O12 C41 C42 119(6) . . ?
O12 C41 C46 116(8) . . ?
C42 C41 C46 120.0 . . ?
C43 C42 C41 120.0 . . ?
C44 C43 C42 120.00(6) . . ?
O15 C44 C43 106(4) . . ?
O15 C44 C45 134(4) . . ?
C43 C44 C45 120.0 . . ?
C44 C45 C46 120.0 . . ?
C44 C45 C50 120.0 . . ?
C46 C45 C50 120.00(6) . . ?
C47 C46 C45 120.0 . . ?
C47 C46 C41 120.0 . . ?
C45 C46 C41 120.00(7) . . ?
C46 C47 C48 120.0 . . ?
C46 C47 O11 134(4) . . ?
C48 C47 O11 105(4) . . ?
C47 C48 C49 120.00(8) . . ?
C48 C49 C50 120.0 . . ?
O16 C50 C49 119(4) . . ?
O16 C50 C45 119(4) . . ?
C49 C50 C45 120.0 . . ?
C406 Ru7 O7 115(3) . . ?
C406 Ru7 O8 122(4) . . ?
O7 Ru7 O8 69(3) . . ?
C406 Ru7 C405 39.3(10) . . ?
O7 Ru7 C405 153(3) . . ?
O8 Ru7 C405 113(3) . . ?
C406 Ru7 C401 39.1(14) . . ?
O7 Ru7 C401 94(3) . . ?
O8 Ru7 C401 147(4) . . ?
C405 Ru7 C401 69.9(15) . . ?
C406 Ru7 N4 161(3) . . ?
O7 Ru7 N4 84(3) . . ?
O8 Ru7 N4 67(4) . . ?
C405 Ru7 N4 123(4) . . ?
C401 Ru7 N4 142(4) . . ?
C406 Ru7 C404 68.8(14) . . ?
O7 Ru7 C404 164(3) . . ?
O8 Ru7 C404 123(4) . . ?
C405 Ru7 C404 37.6(11) . . ?
C401 Ru7 C404 80.0(13) . . ?
N4 Ru7 C404 92(3) . . ?
C406 Ru7 C402 68.4(19) . . ?
O7 Ru7 C402 101(3) . . ?
O8 Ru7 C402 167(3) . . ?
C405 Ru7 C402 80.0(13) . . ?
C401 Ru7 C402 37.2(13) . . ?
N4 Ru7 C402 105(4) . . ?
C404 Ru7 C402 65.6(12) . . ?
C406 Ru7 C403 79.9(13) . . ?
O7 Ru7 C403 128(3) . . ?
O8 Ru7 C403 146(4) . . ?
C405 Ru7 C403 66.7(14) . . ?
C401 Ru7 C403 66.4(15) . . ?
N4 Ru7 C403 85(3) . . ?
C404 Ru7 C403 36.0(9) . . ?
C402 Ru7 C403 35.9(9) . . ?
C406 Ru7 C451 41(4) . . ?
O7 Ru7 C451 89(3) . . ?
O8 Ru7 C451 143(4) . . ?
C405 Ru7 C451 74(4) . . ?
C401 Ru7 C451 6(4) . . ?
N4 Ru7 C451 143(3) . . ?
C404 Ru7 C451 86(3) . . ?
C402 Ru7 C451 40(4) . . ?
C403 Ru7 C451 71(3) . . ?
O9 C31 C32 171.3(14) . . ?
O9 C31 C36 68.6(13) . . ?
C32 C31 C36 120.0 . . ?
C31 C32 C33 120.00(6) . . ?
C32 C33 C34 120.00(7) . . ?
C35 C34 C33 120.0 . . ?
C35 C34 O13 154(6) . . ?
C33 C34 O13 85(5) . . ?
C36 C35 C34 120.0 . . ?
C36 C35 C40 120.00(9) . . ?
C34 C35 C40 120.00(6) . . ?
C37 C36 C35 120.0 . . ?
C37 C36 C31 120.0 . . ?
C35 C36 C31 120.0 . . ?
C36 C37 C38 120.0 . . ?
C36 C37 O10 171(3) . . ?
C38 C37 O10 51(3) . . ?
C37 C38 C39 120.00(9) . . ?
C40 C39 C38 120.0 . . ?
C39 C40 C35 120.0 . . ?
C39 C40 O14 123(6) . . ?
C35 C40 O14 117(6) . . ?
C111 N1 C115 120.0 . . ?
C111 N1 Ru1 120(4) . . ?
C115 N1 Ru1 120(4) . . ?
C112 C111 N1 120.00(7) . . ?
C111 C112 C113 120.00(11) . . ?
C114 C113 C112 120.0 . . ?
C114 C113 C552 106(6) . . ?
C112 C113 C552 132(6) . . ?
C113 C114 C115 120.00(6) . . ?
C114 C115 N1 120.00(10) . . ?
O132 C801 C805 118(5) . . ?
O132 C801 C802 125(5) . . ?
C805 C801 C802 108.0 . . ?
O132 C801 Co2 152(4) . . ?
C805 C801 Co2 71(2) . . ?
C802 C801 Co2 70(2) . . ?
C803 C802 C801 108.0 . . ?
C803 C802 C713 117(10) . 2_656 ?
C801 C802 C713 135(10) . 2_656 ?
C803 C802 Co2 71.8(19) . . ?
C801 C802 Co2 68.2(19) . . ?
C713 C802 Co2 125(10) 2_656 . ?
C802 C803 C804 108.0 . . ?
C802 C803 C313 118(7) . . ?
C804 C803 C313 134(7) . . ?
C802 C803 Co2 67(2) . . ?
C804 C803 Co2 70(2) . . ?
C313 C803 Co2 129(7) . . ?
C805 C804 C803 108.0 . . ?
C805 C804 C413 132(5) . . ?
C803 C804 C413 120(5) . . ?
C805 C804 Co2 67.8(18) . . ?
C803 C804 Co2 70(2) . . ?
C413 C804 Co2 125(4) . . ?
C801 C805 C804 108.0 . . ?
C801 C805 C513 123(5) . . ?
C804 C805 C513 128(5) . . ?
C801 C805 Co2 68(2) . . ?
C804 C805 Co2 71.6(18) . . ?
C513 C805 Co2 124(4) . . ?
O7 C21 C22 110(3) . . ?
O7 C21 C26 130(3) . . ?
C22 C21 C26 120.0 . . ?
C23 C22 C21 120.0 . . ?
C22 C23 C24 120.0 . . ?
O5 C24 C25 112(4) . . ?
O5 C24 C23 99(3) . . ?
C25 C24 C23 120.0 . . ?
C24 C25 C26 120.0 . . ?
C24 C25 C30 120.0 . . ?
C26 C25 C30 120.0 . . ?
C27 C26 C25 120.0 . . ?
C27 C26 C21 120.0 . . ?
C25 C26 C21 120.0 . . ?
C27 C26 O8 35(3) . . ?
C25 C26 O8 153(3) . . ?
C21 C26 O8 86(3) . . ?
O8 C27 C26 97(7) . . ?
O8 C27 C28 141(7) . . ?
C26 C27 C28 120.0 . . ?
C27 C28 C29 120.0 . . ?
C28 C29 C30 120.0 . . ?
O6 C30 C29 122(5) . . ?
O6 C30 C25 112(4) . . ?
C29 C30 C25 120.0 . . ?
C402 C401 C406 120.00(7) . . ?
C402 C401 Ru7 76(2) . . ?
C406 C401 Ru7 68(2) . . ?
C403 C402 C401 120.00(8) . . ?
C403 C402 C451 133(6) . . ?
C401 C402 C451 14(6) . . ?
C403 C402 Ru7 74(3) . . ?
C401 C402 Ru7 67(2) . . ?
C451 C402 Ru7 79(6) . . ?
C402 C403 C404 120.0 . . ?
C402 C403 Ru7 70(3) . . ?
C404 C403 Ru7 69(2) . . ?
C405 C404 C403 120.00(7) . . ?
C405 C404 Ru7 67(2) . . ?
C403 C404 Ru7 75(2) . . ?
C404 C405 C406 120.00(11) . . ?
C404 C405 Ru7 76(2) . . ?
C406 C405 Ru7 68(3) . . ?
C405 C406 C401 120.0 . . ?
C405 C406 C451 133(6) . . ?
C401 C406 C451 14(6) . . ?
C405 C406 Ru7 72(3) . . ?
C401 C406 Ru7 73(3) . . ?
C451 C406 Ru7 85(6) . . ?
C305 Ru8 O5 127(3) . . ?
C305 Ru8 C306 40.3(11) . . ?
O5 Ru8 C306 164(3) . . ?
C305 Ru8 C304 39.4(12) . . ?
O5 Ru8 C304 106(2) . . ?
C306 Ru8 C304 70.0(15) . . ?
C305 Ru8 O6 154(3) . . ?
O5 Ru8 O6 75(2) . . ?
C306 Ru8 O6 115(3) . . ?
C304 Ru8 O6 159(3) . . ?
C305 Ru8 N3 98(2) . . ?
O5 Ru8 N3 59(3) . . ?
C306 Ru8 N3 109(3) . . ?
C304 Ru8 N3 118(3) . . ?
O6 Ru8 N3 81(3) . . ?
C305 Ru8 C301 68.0(14) . . ?
O5 Ru8 C301 160(2) . . ?
C306 Ru8 C301 36.5(9) . . ?
C304 Ru8 C301 77.4(12) . . ?
O6 Ru8 C301 95(2) . . ?
N3 Ru8 C301 138(4) . . ?
C305 Ru8 C303 66.7(16) . . ?
O5 Ru8 C303 109(2) . . ?
C306 Ru8 C303 77.3(12) . . ?
C304 Ru8 C303 35.5(10) . . ?
O6 Ru8 C303 124(2) . . ?
N3 Ru8 C303 150(3) . . ?
C301 Ru8 C303 61.9(10) . . ?
C305 Ru8 C302 77.1(12) . . ?
O5 Ru8 C302 129(2) . . ?
C306 Ru8 C302 63.7(11) . . ?
C304 Ru8 C302 62.9(12) . . ?
O6 Ru8 C302 100(2) . . ?
N3 Ru8 C302 172(3) . . ?
C301 Ru8 C302 33.8(7) . . ?
C303 Ru8 C302 33.4(7) . . ?
C305 Ru8 C557 31(3) . . ?
O5 Ru8 C557 97(3) . . ?
C306 Ru8 C557 71(3) . . ?
C304 Ru8 C557 33(3) . . ?
O6 Ru8 C557 166(3) . . ?
N3 Ru8 C557 86(4) . . ?
C301 Ru8 C557 96(3) . . ?
C303 Ru8 C557 69(3) . . ?
C302 Ru8 C557 93(3) . . ?
C411 N4 C415 120.0 . . ?
C411 N4 Ru7 123(4) . . ?
C415 N4 Ru7 117(4) . . ?
N4 C411 C412 120.0 . . ?
C413 C412 C411 120.0 . . ?
C412 C413 C414 120.0 . . ?
C412 C413 C804 108(5) . . ?
C414 C413 C804 131(5) . . ?
C413 C414 C415 120.0 . . ?
C414 C415 N4 120.00(5) . . ?
C584 C951 C953 108.0 . . ?
C584 C951 Co1 58(3) . . ?
C953 C951 Co1 74.5(19) . . ?
C954 C953 C951 108.0 . . ?
C954 C953 Co1 61(2) . . ?
C951 C953 Co1 70.2(19) . . ?
C952 C954 C953 108.0 . . ?
C952 C954 Co1 59(3) . . ?
C953 C954 Co1 83(3) . . ?
C954 C952 C584 108.0 . . ?
C954 C952 Co1 79(3) . . ?
C584 C952 Co1 74(3) . . ?
C952 C584 C951 108.0 . . ?
C952 C584 Co1 62(3) . . ?
C951 C584 Co1 84(3) . . ?
C503 C501 C502 120.0 . . ?
C503 C501 Ru5 72(2) . . ?
C502 C501 Ru5 69(2) . . ?
C504 C503 C501 120.0 . . ?
C504 C503 Ru5 68(2) . . ?
C501 C503 Ru5 73(2) . . ?
C505 C504 C503 120.0 . . ?
C505 C504 Ru5 68(2) . . ?
C503 C504 Ru5 75(2) . . ?
C504 C505 C506 120.0 . . ?
C504 C505 C507 111(10) . . ?
C506 C505 C507 125(10) . . ?
C504 C505 Ru5 74(2) . . ?
C506 C505 Ru5 71(2) . . ?
C507 C505 Ru5 147(10) . . ?
C502 C506 C505 120.0 . . ?
C502 C506 Ru5 75(2) . . ?
C505 C506 Ru5 70(2) . . ?
C506 C502 C501 120.0 . . ?
C506 C502 Ru5 68(2) . . ?
C501 C502 Ru5 75(2) . . ?
C206 Ru2 O3 168(3) . . ?
C206 Ru2 C201 40.7(14) . . ?
O3 Ru2 C201 128(3) . . ?
C206 Ru2 O4 102(3) . . ?
O3 Ru2 O4 78(3) . . ?
C201 Ru2 O4 96(2) . . ?
C206 Ru2 C205 40.3(10) . . ?
O3 Ru2 C205 144(3) . . ?
C201 Ru2 C205 70.8(15) . . ?
O4 Ru2 C205 135(3) . . ?
C206 Ru2 N2 107(2) . . ?
O3 Ru2 N2 85(3) . . ?
C201 Ru2 N2 146(2) . . ?
O4 Ru2 N2 81(2) . . ?
C205 Ru2 N2 87.5(19) . . ?
C206 Ru2 C202 67.6(14) . . ?
O3 Ru2 C202 102(3) . . ?
C201 Ru2 C202 35.8(8) . . ?
O4 Ru2 C202 118(2) . . ?
C205 Ru2 C202 76.9(11) . . ?
N2 Ru2 C202 161.3(19) . . ?
C206 Ru2 C204 67.0(12) . . ?
O3 Ru2 C204 112(3) . . ?
C201 Ru2 C204 76.8(11) . . ?
O4 Ru2 C204 169(2) . . ?
C205 Ru2 C204 35.3(10) . . ?
N2 Ru2 C204 101(2) . . ?
C202 Ru2 C204 60.8(12) . . ?
C206 Ru2 C203 76.5(12) . . ?
O3 Ru2 C203 97(3) . . ?
C201 Ru2 C203 62.6(12) . . ?
O4 Ru2 C203 149(2) . . ?
C205 Ru2 C203 62.2(13) . . ?
N2 Ru2 C203 130(2) . . ?
C202 Ru2 C203 32.9(8) . . ?
C204 Ru2 C203 32.8(8) . . ?
C206 Ru2 C586 54(3) . . ?
O3 Ru2 C586 114(3) . . ?
C201 Ru2 C586 15(3) . . ?
O4 Ru2 C586 85(3) . . ?
C205 Ru2 C586 86(2) . . ?
N2 Ru2 C586 153(3) . . ?
C202 Ru2 C586 37(3) . . ?
C204 Ru2 C586 89(2) . . ?
C203 Ru2 C586 69(3) . . ?
C602 C601 C606 120.0 . . ?
C602 C601 Ru3 70(2) . . ?
C606 C601 Ru3 65(2) . . ?
C603 C602 C601 120.0 . . ?
C603 C602 Ru3 60(2) . . ?
C601 C602 Ru3 75(2) . . ?
C602 C603 C604 120.0 . . ?
C602 C603 Ru3 82(2) . . ?
C604 C603 Ru3 60(3) . . ?
C605 C604 C603 120.0 . . ?
C605 C604 Ru3 71(3) . . ?
C603 C604 Ru3 77(3) . . ?
C606 C605 C604 120.00(6) . . ?
C606 C605 Ru3 82(2) . . ?
C604 C605 Ru3 64(3) . . ?
C605 C606 C601 120.0 . . ?
C605 C606 Ru3 59(2) . . ?
C601 C606 Ru3 80(2) . . ?
O10 Ru5 O9 83.5(11) . . ?
O10 Ru5 C505 85(3) . . ?
O9 Ru5 C505 130(3) . . ?
O10 Ru5 N5 103(3) . . ?
O9 Ru5 N5 77(2) . . ?
C505 Ru5 N5 153(3) . . ?
O10 Ru5 C506 87(2) . . ?
O9 Ru5 C506 166(3) . . ?
C505 Ru5 C506 38.6(10) . . ?
N5 Ru5 C506 115(3) . . ?
O10 Ru5 C504 112(3) . . ?
O9 Ru5 C504 106(2) . . ?
C505 Ru5 C504 37.9(10) . . ?
N5 Ru5 C504 145(3) . . ?
C506 Ru5 C504 68.3(14) . . ?
O10 Ru5 C502 118(3) . . ?
O9 Ru5 C502 156(3) . . ?
C505 Ru5 C502 68.1(13) . . ?
N5 Ru5 C502 86(2) . . ?
C506 Ru5 C502 37.5(9) . . ?
C504 Ru5 C502 78.8(11) . . ?
O10 Ru5 C503 148(3) . . ?
O9 Ru5 C503 104(2) . . ?
C505 Ru5 C503 66.9(13) . . ?
N5 Ru5 C503 109(3) . . ?
C506 Ru5 C503 78.8(11) . . ?
C504 Ru5 C503 36.4(9) . . ?
C502 Ru5 C503 65.1(12) . . ?
O10 Ru5 C501 153(3) . . ?
O9 Ru5 C501 123(2) . . ?
C505 Ru5 C501 78.8(11) . . ?
N5 Ru5 C501 84(2) . . ?
C506 Ru5 C501 66.4(12) . . ?
C504 Ru5 C501 65.3(12) . . ?
C502 Ru5 C501 36.1(8) . . ?
C503 Ru5 C501 35.6(8) . . ?
C586 C201 C202 87(9) . . ?
C586 C201 C206 152(9) . . ?
C202 C201 C206 120.00(6) . . ?
C586 C201 Ru2 118(10) . . ?
C202 C201 Ru2 84(3) . . ?
C206 C201 Ru2 63.8(19) . . ?
C201 C202 C203 120.0 . . ?
C201 C202 C586 29(4) . . ?
C203 C202 C586 149(4) . . ?
C201 C202 Ru2 60(2) . . ?
C203 C202 Ru2 80(2) . . ?
C586 C202 Ru2 76(4) . . ?
C202 C203 C204 120.00(6) . . ?
C202 C203 Ru2 68(2) . . ?
C204 C203 Ru2 68.8(15) . . ?
C203 C204 C205 120.00(6) . . ?
C203 C204 Ru2 78.4(16) . . ?
C205 C204 Ru2 61(2) . . ?
C206 C205 C204 120.0 . . ?
C206 C205 Ru2 63(3) . . ?
C204 C205 Ru2 84(3) . . ?
C205 C206 C201 120.00(5) . . ?
C205 C206 Ru2 77(3) . . ?
C201 C206 Ru2 75(2) . . ?
C806 C807 C595 108.00(6) . . ?
C806 C807 Co2 74(4) . . ?
C595 C807 Co2 76(5) . . ?
C807 C806 C833 108.00(7) . . ?
C807 C806 Co2 62(5) . . ?
C833 C806 Co2 81(5) . . ?
C806 C833 C818 108.0 . . ?
C806 C833 Co2 60(5) . . ?
C818 C833 Co2 73(4) . . ?
C595 C818 C833 108.00(7) . . ?
C595 C818 Co2 61(4) . . ?
C833 C818 Co2 70(3) . . ?
C818 C595 C807 108.0 . . ?
C818 C595 Co2 81(5) . . ?
C807 C595 Co2 60(5) . . ?
C121 N2 C372 120.0 . . ?
C121 N2 Ru2 113(4) . . ?
C372 N2 Ru2 127(4) . . ?
N2 C121 C391 120.0 . . ?
C392 C391 C121 120.00(8) . . ?
C391 C392 C393 120.0 . . ?
C391 C392 C553 138(7) . . ?
C393 C392 C553 99(7) . . ?
C372 C393 C392 120.00(9) . . ?
C393 C372 N2 120.00(8) . . ?
C604 Ru3 C605 44.8(19) . . ?
C604 Ru3 C603 42.7(15) . . ?
C605 Ru3 C603 77(2) . . ?
C604 Ru3 O12 121(5) . . ?
C605 Ru3 O12 165(5) . . ?
C603 Ru3 O12 91(3) . . ?
C604 Ru3 O11 96(3) . . ?
C605 Ru3 O11 96(2) . . ?
C603 Ru3 O11 126(3) . . ?
O12 Ru3 O11 84(4) . . ?
C604 Ru3 N6 144(3) . . ?
C605 Ru3 N6 100(3) . . ?
C603 Ru3 N6 150(3) . . ?
O12 Ru3 N6 95(5) . . ?
O11 Ru3 N6 84(2) . . ?
C604 Ru3 C606 75(2) . . ?
C605 Ru3 C606 39.5(14) . . ?
C603 Ru3 C606 83.8(17) . . ?
O12 Ru3 C606 149(6) . . ?
O11 Ru3 C606 124(2) . . ?
N6 Ru3 C606 76(2) . . ?
C604 Ru3 C602 71.8(18) . . ?
C605 Ru3 C602 83.7(17) . . ?
C603 Ru3 C602 37.3(10) . . ?
O12 Ru3 C602 92(3) . . ?
O11 Ru3 C602 163(3) . . ?
N6 Ru3 C602 113(3) . . ?
C606 Ru3 C602 65.7(13) . . ?
C604 Ru3 C601 83.5(17) . . ?
C605 Ru3 C601 68.5(17) . . ?
C603 Ru3 C601 66.7(14) . . ?
O12 Ru3 C601 115(5) . . ?
O11 Ru3 C601 159(2) . . ?
N6 Ru3 C601 84(2) . . ?
C606 Ru3 C601 35.6(9) . . ?
C602 Ru3 C601 34.9(8) . . ?
C105 C106 C101 120.0 . . ?
C105 C106 C107 156(6) . . ?
C101 C106 C107 83(6) . . ?
C105 C106 Ru1 70(2) . . ?
C101 C106 Ru1 73(2) . . ?
C107 C106 Ru1 128(6) . . ?
C106 C105 C104 120.00(12) . . ?
C106 C105 Ru1 74(3) . . ?
C104 C105 Ru1 70(3) . . ?
C103 C104 C105 120.0 . . ?
C103 C104 Ru1 72(3) . . ?
C105 C104 Ru1 73(3) . . ?
C104 C103 C102 120.00(6) . . ?
C104 C103 Ru1 70(2) . . ?
C102 C103 Ru1 74(3) . . ?
C101 C102 C103 120.00(15) . . ?
C101 C102 Ru1 73(3) . . ?
C103 C102 Ru1 69(3) . . ?
C102 C101 C106 120.00(7) . . ?
C102 C101 C107 169(5) . . ?
C106 C101 C107 50(5) . . ?
C102 C101 Ru1 71(3) . . ?
C106 C101 Ru1 71(2) . . ?
C107 C101 Ru1 107(5) . . ?
N7 Ru6 O14 86(3) . . ?
N7 Ru6 C705 119(2) . . ?
O14 Ru6 C705 82(3) . . ?
N7 Ru6 C701 152(3) . . ?
O14 Ru6 C701 84(2) . . ?
C705 Ru6 C701 33.2(3) . . ?
N7 Ru6 C702 99(2) . . ?
O14 Ru6 C702 107(3) . . ?
C705 Ru6 C702 33.1(3) . . ?
C701 Ru6 C702 59.1(5) . . ?
N7 Ru6 C704 161(2) . . ?
O14 Ru6 C704 112(3) . . ?
C705 Ru6 C704 59.0(5) . . ?
C701 Ru6 C704 33.0(3) . . ?
C702 Ru6 C704 69.0(5) . . ?
N7 Ru6 C703 103(2) . . ?
O14 Ru6 C703 139(3) . . ?
C705 Ru6 C703 58.8(5) . . ?
C701 Ru6 C703 69.0(5) . . ?
C702 Ru6 C703 32.8(3) . . ?
C704 Ru6 C703 58.4(5) . . ?
N7 Ru6 C706 128(2) . . ?
O14 Ru6 C706 143(3) . . ?
C705 Ru6 C706 69.0(5) . . ?
C701 Ru6 C706 58.7(5) . . ?
C702 Ru6 C706 58.4(5) . . ?
C704 Ru6 C706 32.7(3) . . ?
C703 Ru6 C706 32.6(3) . . ?
N7 Ru6 O13 64(5) . . ?
O14 Ru6 O13 93.3(16) . . ?
C705 Ru6 O13 174(2) . . ?
C701 Ru6 O13 143(4) . . ?
C702 Ru6 O13 153(2) . . ?
C704 Ru6 O13 120(5) . . ?
C703 Ru6 O13 126(3) . . ?
C706 Ru6 O13 114(5) . . ?
C711 N7 C715 120.0 . . ?
C711 N7 Ru6 128(4) . . ?
C715 N7 Ru6 111(4) . . ?
C712 C711 N7 120.0 . . ?
C711 C712 C713 120.0 . . ?
C714 C713 C712 120.0 . . ?
C714 C713 C802 138(10) . 2_656 ?
C712 C713 C802 102(10) . 2_656 ?
C713 C714 C715 120.0 . . ?
C714 C715 N7 120.0 . . ?
C4 O3 Ru2 152(9) . . ?
C815 N8 C811 120.0 . . ?
C815 N8 Ru4 103(5) . . ?
C811 N8 Ru4 134(5) . . ?
C814 C815 N8 120.00(8) . . ?
C815 C814 C813 120.00(5) . . ?
C812 C813 C814 120.0 . . ?
C812 C813 C551 105(6) . 2_557 ?
C814 C813 C551 134(6) . 2_557 ?
C813 C812 C811 120.0 . . ?
C812 C811 N8 120.00(5) . . ?
C27 O8 C26 48(4) . . ?
C27 O8 Ru7 166(10) . . ?
C26 O8 Ru7 129(5) . . ?
C614 C613 C612 120.0 . . ?
C614 C613 C554 128(5) . . ?
C612 C613 C554 107(4) . . ?
C613 C614 C615 120.0 . . ?
N6 C615 C614 120.0 . . ?
C615 N6 C611 120.0 . . ?
C615 N6 Ru3 118(4) . . ?
C611 N6 Ru3 121(4) . . ?
C612 C611 N6 120.0 . . ?
C611 C612 C613 120.0 . . ?
C21 O7 Ru7 124(4) . . ?
C515 N5 C511 120.0 . . ?
C515 N5 Ru5 121(5) . . ?
C511 N5 Ru5 119(5) . . ?
C514 C515 N5 120.00(6) . . ?
C515 C514 C513 120.0 . . ?
C514 C513 C512 120.0 . . ?
C514 C513 C805 117(6) . . ?
C512 C513 C805 120(5) . . ?
C511 C512 C513 120.0 . . ?
C512 C511 N5 120.0 . . ?
C24 O5 Ru8 111(4) . . ?
C557 C304 C305 56(6) . . ?
C557 C304 C303 170(7) . . ?
C305 C304 C303 120.00(5) . . ?
C557 C304 Ru8 89(6) . . ?
C305 C304 Ru8 64(2) . . ?
C303 C304 Ru8 81.7(19) . . ?
C557 C305 C306 171(7) . . ?
C557 C305 C304 61(7) . . ?
C306 C305 C304 120.0 . . ?
C557 C305 O116 81(6) . . ?
C306 C305 O116 100(6) . . ?
C304 C305 O116 140(6) . . ?
C557 C305 Ru8 99(7) . . ?
C306 C305 Ru8 74(2) . . ?
C304 C305 Ru8 77(2) . . ?
O116 C305 Ru8 125(5) . . ?
C305 C306 C301 120.0 . . ?
C305 C306 Ru8 66(2) . . ?
C301 C306 Ru8 81(2) . . ?
C302 C301 C306 120.00(5) . . ?
C302 C301 Ru8 79(2) . . ?
C306 C301 Ru8 62.1(19) . . ?
C301 C302 C303 120.0 . . ?
C301 C302 Ru8 67(2) . . ?
C303 C302 Ru8 70(2) . . ?
C302 C303 C304 120.0 . . ?
C302 C303 Ru8 77(2) . . ?
C304 C303 Ru8 62.8(19) . . ?
C7 O2 Ru1 114(4) . . ?
C315 N3 C311 120.0 . . ?
C315 N3 Ru8 125(8) . . ?
C311 N3 Ru8 115(8) . . ?
C314 C315 N3 120.00(7) . . ?
C313 C314 C315 120.0 . . ?
C312 C313 C314 120.0 . . ?
C312 C313 C803 118(10) . . ?
C314 C313 C803 121(10) . . ?
C313 C312 C311 120.00(6) . . ?
C312 C311 N3 120.00(6) . . ?
C108 C107 C106 110(9) . . ?
C108 C107 C109 115(9) . . ?
C106 C107 C109 134(9) . . ?
C108 C107 C101 115(7) . . ?
C106 C107 C101 47(4) . . ?
C109 C107 C101 105(7) . . ?
C40 O14 Ru6 152(7) . . ?
C807 Co2 C801 79(5) . . ?
C807 Co2 C595 44(3) . . ?
C801 Co2 C595 123(5) . . ?
C807 Co2 C802 113(5) . . ?
C801 Co2 C802 41.8(12) . . ?
C595 Co2 C802 153(3) . . ?
C807 Co2 C806 45(3) . . ?
C801 Co2 C806 72(3) . . ?
C595 Co2 C806 71(3) . . ?
C802 Co2 C806 81(3) . . ?
C807 Co2 C805 88(4) . . ?
C801 Co2 C805 41.6(10) . . ?
C595 Co2 C805 115(5) . . ?
C802 Co2 C805 69.6(14) . . ?
C806 Co2 C805 107(4) . . ?
C807 Co2 C803 149(5) . . ?
C801 Co2 C803 69.3(14) . . ?
C595 Co2 C803 166(4) . . ?
C802 Co2 C803 40.8(11) . . ?
C806 Co2 C803 121(3) . . ?
C805 Co2 C803 68.5(12) . . ?
C807 Co2 C804 127(4) . . ?
C801 Co2 C804 69.1(12) . . ?
C595 Co2 C804 133(3) . . ?
C802 Co2 C804 68.6(13) . . ?
C806 Co2 C804 141(3) . . ?
C805 Co2 C804 40.6(10) . . ?
C803 Co2 C804 40.2(9) . . ?
C807 Co2 C818 68(3) . . ?
C801 Co2 C818 138(3) . . ?
C595 Co2 C818 38.5(19) . . ?
C802 Co2 C818 131(4) . . ?
C806 Co2 C818 66(2) . . ?
C805 Co2 C818 153(4) . . ?
C803 Co2 C818 138(4) . . ?
C804 Co2 C818 153(3) . . ?
C807 Co2 C833 69(2) . . ?
C801 Co2 C833 107(4) . . ?
C595 Co2 C833 66(2) . . ?
C802 Co2 C833 95(3) . . ?
C806 Co2 C833 39.2(15) . . ?
C805 Co2 C833 146(4) . . ?
C803 Co2 C833 120(3) . . ?
C804 Co2 C833 160(3) . . ?
C818 Co2 C833 37.1(16) . . ?
C31 O9 Ru5 175(2) . . ?
C1 O1 Ru1 130(5) . . ?
O16 Ru4 O15 85(2) . . ?
O16 Ru4 N8 84(3) . . ?
O15 Ru4 N8 74(3) . . ?
O16 Ru4 C776 120(3) . . ?
O15 Ru4 C776 154(3) . . ?
N8 Ru4 C776 101(3) . . ?
O16 Ru4 C772 95(3) . . ?
O15 Ru4 C772 151(3) . . ?
N8 Ru4 C772 77(3) . . ?
C776 Ru4 C772 32.7(4) . . ?
O16 Ru4 C775 111(3) . . ?
O15 Ru4 C775 148(3) . . ?
N8 Ru4 C775 133(3) . . ?
C776 Ru4 C775 32.5(3) . . ?
C772 Ru4 C775 57.9(5) . . ?
O16 Ru4 C774 64(3) . . ?
O15 Ru4 C774 143(3) . . ?
N8 Ru4 C774 82(4) . . ?
C776 Ru4 C774 57.7(4) . . ?
C772 Ru4 C774 32.3(3) . . ?
C775 Ru4 C774 67.1(5) . . ?
O16 Ru4 C777 80(3) . . ?
O15 Ru4 C777 141(3) . . ?
N8 Ru4 C777 138(3) . . ?
C776 Ru4 C777 57.3(5) . . ?
C772 Ru4 C777 67.1(5) . . ?
C775 Ru4 C777 31.9(4) . . ?
C774 Ru4 C777 56.6(7) . . ?
O16 Ru4 C778 56(2) . . ?
O15 Ru4 C778 139(3) . . ?
N8 Ru4 C778 110(4) . . ?
C776 Ru4 C778 67.1(5) . . ?
C772 Ru4 C778 57.0(5) . . ?
C775 Ru4 C778 56.7(7) . . ?
C774 Ru4 C778 31.7(4) . . ?
C777 Ru4 C778 31.5(5) . . ?
C41 O12 Ru3 132(5) . . ?
C47 O11 Ru3 123(4) . . ?
C50 O16 Ru4 137(4) . . ?
C44 O15 Ru4 120(4) . . ?
O81 F5 F4 59(5) . . ?
O81 F4 F5 53(5) . . ?
O81 F4 C651 114(7) . . ?
F5 F4 C651 167(8) . . ?
C305 C557 C304 63(6) . . ?
C305 C557 Ru8 51(5) . . ?
C304 C557 Ru8 58(5) . . ?
F5 O81 F4 68(5) . . ?
F5 O81 O39 144(6) . . ?
F4 O81 O39 131(5) . . ?
C201 C586 C202 64(7) . . ?
C201 C586 Ru2 47(8) . . ?
C202 C586 Ru2 67(4) . . ?
O181 O64 F16 124(5) . . ?
O181 O64 S12 119(5) . . ?
F16 O64 S12 87(4) . . ?
O181 O64 C558 76(4) . . ?
F16 O64 C558 60(4) . . ?
S12 O64 C558 144(4) . . ?
O115 S7 O131 138(8) . . ?
O115 S7 O119 79(7) . . ?
O131 S7 O119 73(5) . . ?
O103 S8 O161 65(4) . . ?
O103 S8 O151 105(4) . . ?
O161 S8 O151 57(4) . . ?
C754 O151 O161 151(6) . . ?
C754 O151 S8 95(5) . . ?
O161 O151 S8 61(4) . . ?
O151 O161 S8 62(4) . . ?
F16 C452 F14 63(6) . . ?
C402 C451 C406 93(8) . . ?
C402 C451 Ru7 60(5) . . ?
C406 C451 Ru7 54(5) . . ?
C30 O6 Ru8 147(6) . . ?
F16 C558 O64 55(4) . . ?
O64 F16 C452 122(8) . . ?
O64 F16 C558 65(5) . . ?
C452 F16 C558 151(9) . . ?
C10 O4 Ru2 120(3) . . ?
C37 O10 Ru5 74.1(18) . . ?
C34 O13 Ru6 80(4) . . ?
 
_refine_diff_density_max    1.629
_refine_diff_density_min   -1.725
_refine_diff_density_rms    0.321

_shelx_res_file
;

    yj03-17.res created by SHELXL-2014/7

TITL yj03-17 in P2
CELL 0.71073  27.4515  11.2982  37.1735  90.000  90.008  90.000
ZERR   2.00   0.0019   0.0010   0.0032   0.000   0.005   0.000
LATT -1
SYMM -X, Y, -Z
SFAC C  H  F  S  Co Ru O  N
UNIT 600  600  12  12  12  12  96  24
L.S. 2
ACTA
BOND
FMAP 2
PLAN 30
SADI Co3 C551 Co3 C552 Co3 C553 Co3 C554 Co3 C555
BIND C552 C551
BIND O13  C34
BIND C552 C553
BIND C554 C555
BIND C392 C553
BIND O13  Ru6
BIND C705 C701
BIND C704 C706
BIND C703 C706
BIND C778 C777
BIND C778 C774
BIND C777 C775
BIND C774 C772
FREE C37  Ru5
FREE Ru2  C121
FREE C33  O13
FREE O13  C715
FREE C714 O13
FREE C38  O10
FREE C36  O9
FREE C37  O9
FREE C705 O14
FREE C777 C49
FREE O183 C778
FREE C774 C815
DFIX 2.5 C772 RU4 C774 RU4 C775 RU4
DFIX 2.5 C701 RU6 C702 RU6 C706 RU6
DFIX 1.33 C31 O9 C37 O10 C47 O11 C41 O12
DFIX 1.3 C801 O132
DFIX 1.5 C313 C803 C413 C804
DFIX 1.33 O13 C34 O14 C40
DFIX 1.53 C505 C507
DFIX 1.4 C801 C802 C802 C803
DFIX 1.45 C392 C553 C552 C113
DFIX 1.35 O9 C36
DFIX 2.95 O13 O14 O9 O10
DFIX 2.05 RU5 O9 RU5 O10
DFIX 2.05 RU3 O11 RU3 O12
DFIX 2.05 RU6 O13 RU6 O14
DFIX 2.05 RU4 O15 RU4 O16
DFIX 2.05 RU7 O7 RU7 O8
DFIX 2.1 RU1 N1 RU2 N2 RU3 N6 RU4 N8 RU5 N5 RU6 N7 RU7 N4 RU8 N3
DFIX 2.05 RU1 O1 RU1 O2 RU2 O3 RU2 O4 RU3 O5
DFIX 2.05 RU8 O6 RU8 O5
FLAT RU5 O10 O9 C31 C36 C37
TEMP 23.000
WGHT    0.200000    0.317742
FVAR       0.02407
AFIX  66
MOLE 1
C703  1    0.217451    0.684205    0.681640    11.00000    0.11289
C706  1    0.225847    0.622355    0.713364    11.00000    0.74745
C704  1    0.259668    0.664375    0.738092    11.00000    0.98440
C701  1    0.285093    0.768246    0.731095    11.00000    0.00900
C705  1    0.276698    0.830097    0.699371    11.00000    0.22881
C702  1    0.242877    0.788078    0.674644    11.00000    0.50962
AFIX  56
C551  1    0.179742    0.533207    1.012920    11.00000    0.15613
C552  1    0.211258    0.445724    0.998413    11.00000    0.05762
C553  1    0.203682    0.441628    0.960645    11.00000    0.05256
C554  1    0.167484    0.526579    0.951811    11.00000    0.34555
C555  1    0.152688    0.583178    0.984119    11.00000    0.00387
AFIX  66
C774  1   -0.219130    0.819213    0.850656    11.00000    0.36020
C778  1   -0.208334    0.855692    0.815848    11.00000    0.59469
C777  1   -0.233840    0.808595    0.786888    11.00000    0.12574
C775  1   -0.270142    0.725018    0.792737    11.00000    0.33360
C776  1   -0.280939    0.688539    0.827545    11.00000    0.13174
C772  1   -0.255434    0.735635    0.856504    11.00000    1.47616
AFIX   0
CO1   5    0.133135    0.403504    0.987123    11.00000    0.00425    0.17076 =
         0.09638   -0.00014    0.01957   -0.01506
AFIX 116
C1    1    0.374848    0.065373    0.992237    11.00000    0.03546
C2    1    0.350253   -0.027144    0.975572    11.00000    0.11229
C3    1    0.341713   -0.023714    0.938730    11.00000    0.23235
C4    1    0.357768    0.072233    0.918552    11.00000    0.00728
C5    1    0.382363    0.164751    0.935216    11.00000    2.00000
C6    1    0.390903    0.161322    0.972059    11.00000    0.48902
C7    1    0.415497    0.253837    0.988725    11.00000    0.21118
C8    1    0.431552    0.349785    0.968547    11.00000    0.00855
C9    1    0.423013    0.353217    0.931705    11.00000    0.04640
C10   1    0.398419    0.260702    0.915039    11.00000   -0.00100
AFIX   0
RU1   6    0.387254    0.163301    1.064170    11.00000    0.02564    0.27337 =
         0.12836    0.02236    0.01045    0.03647
AFIX 116
C41   1    0.006791    0.569691    0.799733    11.00000    0.05108
C42   1   -0.016729    0.463710    0.792054    11.00000    0.30958
C43   1   -0.066852    0.454445    0.796546    11.00000    0.07971
C44   1   -0.093454    0.551161    0.808716    11.00000    0.01384
C45   1   -0.069934    0.657143    0.816394    11.00000    0.07738
C46   1   -0.019811    0.666410    0.811903    11.00000    0.22946
C47   1    0.003711    0.772389    0.819582    11.00000    0.10175
C48   1   -0.022890    0.869107    0.831752    11.00000    0.09349
C49   1   -0.073012    0.859845    0.836243    11.00000    0.40012
C50   1   -0.096534    0.753865    0.828565    11.00000    2.00000
AFIX   0
RU7   6    0.841003    0.195142    0.651609    11.00000    0.03198    0.15987 =
         0.11657   -0.00283    0.00145    0.01991
AFIX 116
C31   1    0.519644    0.493996    0.692076    11.00000    2.00000
C32   1    0.492244    0.391434    0.687942    11.00000    2.00000
C33   1    0.442036    0.398712    0.683626    11.00000    0.32532
C34   1    0.419228    0.508550    0.683444    11.00000    0.99397
C35   1    0.446628    0.611113    0.687578    11.00000    0.19363
C36   1    0.496836    0.603837    0.691895    11.00000    0.01050
C37   1    0.524238    0.706396    0.696029    11.00000    0.30839
C38   1    0.501431    0.816236    0.695848    11.00000    0.29105
C39   1    0.451223    0.823516    0.691532    11.00000    0.63706
C40   1    0.423822    0.720956    0.687397    11.00000    0.19901
AFIX  66
N1    8    0.325211    0.249060    1.044621    11.00000    0.03114
C111  1    0.284628    0.183646    1.034382    11.00000    0.09335
C112  1    0.243494    0.240878    1.021231    11.00000    0.04744
C113  1    0.242941    0.363525    1.018318    11.00000    2.00000
C114  1    0.283524    0.428940    1.028557    11.00000    0.11135
C115  1    0.324659    0.371709    1.041708    11.00000    0.12276
AFIX  56
C801  1    0.644516    0.575043    0.510880    11.00000    0.01976
C802  1    0.674217    0.517806    0.484893    11.00000    0.23864
C803  1    0.706863    0.441630    0.503388    11.00000    0.01410
C804  1    0.697338    0.451788    0.540806    11.00000    0.03272
C805  1    0.658806    0.534242    0.545436    11.00000    0.01573
AFIX 116
C21   1    0.851559    0.078018    0.578619    11.00000    0.01134
C22   1    0.835530   -0.018704    0.558771    11.00000    0.13830
C23   1    0.848075   -0.029055    0.522683    11.00000    0.09730
C24   1    0.876648    0.057314    0.506443    11.00000    0.01637
C25   1    0.892677    0.154037    0.526291    11.00000   -0.00100
C26   1    0.880133    0.164390    0.562379    11.00000    0.01846
C27   1    0.896161    0.261110    0.582228    11.00000    0.11522
C28   1    0.924734    0.347481    0.565989    11.00000    0.03629
C29   1    0.937280    0.337132    0.529901    11.00000    0.02956
C30   1    0.921251    0.240411    0.510052    11.00000    0.01167
AFIX  66
C401  1    0.842734    0.078686    0.696057    11.00000    0.27054
C402  1    0.794654    0.117053    0.694814    11.00000    0.13057
C403  1    0.784284    0.237468    0.694464    11.00000    0.06880
C404  1    0.821994    0.319517    0.695359    11.00000    0.06719
C405  1    0.870074    0.281152    0.696603    11.00000    0.09317
C406  1    0.880445    0.160737    0.696952    11.00000    0.08917
AFIX   0
RU8   6    0.886996    0.164022    0.435616    11.00000    0.01757    0.01176 =
         0.20072   -0.01873    0.01459    0.01254
AFIX  66
N4    8    0.791658    0.278097    0.615455    11.00000    2.00000
C411  1    0.783094    0.399349    0.615174    11.00000    0.16312
C412  1    0.749643    0.447216    0.591165    11.00000    0.07591
C413  1    0.724756    0.373831    0.567436    11.00000    0.04278
C414  1    0.733320    0.252579    0.567716    11.00000    0.64561
C415  1    0.766771    0.204710    0.591726    11.00000    0.08205
AFIX  56
C951  1    0.121806    0.204035    0.976455    11.00000    0.04569
C953  1    0.121000    0.216817    1.014452    11.00000    0.01852
C954  1    0.089153    0.311779    1.022996    11.00000    0.01886
C952  1    0.070276    0.357686    0.990280    11.00000    2.00000
C584  1    0.090457    0.291097    0.961516    11.00000    0.02806
AFIX  66
C501  1    0.684236    0.655044    0.710245    11.00000    0.09054
C503  1    0.659088    0.608417    0.739440    11.00000    0.08175
C504  1    0.628083    0.680156    0.759400    11.00000    0.13445
C505  1    0.622226    0.798521    0.750165    11.00000    0.13980
C506  1    0.647374    0.845149    0.720971    11.00000    0.04560
C502  1    0.678379    0.773412    0.701011    11.00000    0.06080
AFIX   0
RU2   6    0.340643    0.201239    0.848742    11.00000    0.02680    0.08734 =
         0.14717    0.00677    0.02091    0.00692
AFIX  66
C601  1    0.182953    0.628747    0.788591    11.00000    0.01485
C602  1    0.156296    0.614894    0.757077    11.00000    0.14517
C603  1    0.127491    0.707128    0.744432    11.00000    0.07164
C604  1    0.125343    0.813217    0.763299    11.00000    1.00117
C605  1    0.152000    0.827072    0.794813    11.00000    0.07287
C606  1    0.180805    0.734838    0.807459    11.00000    2.00000
AFIX   0
RU5   6    0.603845    0.701648    0.704045    11.00000    0.05123    0.20548 =
         0.09433    0.02123   -0.00688   -0.08742
AFIX  66
C201  1    0.381316    0.213543    0.802276    11.00000    2.00000
C202  1    0.374643    0.091690    0.800760    11.00000   -0.00100
C203  1    0.327882    0.044583    0.801633    11.00000    0.58081
C204  1    0.287795    0.119328    0.804022    11.00000    0.07791
C205  1    0.294468    0.241181    0.805538    11.00000    0.06113
C206  1    0.341228    0.288290    0.804665    11.00000    0.03989
AFIX  56
C807  1    0.574350    0.452032    0.521529    11.00000    0.51407
C806  1    0.582889    0.466725    0.484121    11.00000    0.11667
C833  1    0.585971    0.352559    0.468309    11.00000    0.09928
C818  1    0.579337    0.267308    0.495946    11.00000    0.18400
C595  1    0.572154    0.328785    0.528838    11.00000    0.18455
AFIX  66
N2    8    0.289210    0.284924    0.882660    11.00000    0.04208
C121  1    0.258898    0.205234    0.900277    11.00000    0.09297
C391  1    0.224699    0.246020    0.924905    11.00000    0.08921
C392  1    0.220812    0.366496    0.931915    11.00000    0.13380
C393  1    0.251124    0.446187    0.914298    11.00000    0.08878
C372  1    0.285323    0.405403    0.889670    11.00000    0.37817
AFIX   0
RU3   6    0.104501    0.708577    0.795406    11.00000    0.05083    0.11712 =
         0.12081    0.00860    0.00375   -0.02167
AFIX  66
C106  1    0.455085    0.118010    1.095140    11.00000    2.00000
C105  1    0.442247    0.235493    1.100909    11.00000    0.04510
C104  1    0.395828    0.263430    1.113194    11.00000    0.10699
C103  1    0.362248    0.173884    1.119711    11.00000    0.34862
C102  1    0.375085    0.056400    1.113942    11.00000    0.19393
C101  1    0.421504    0.028461    1.101657    11.00000    0.07447
AFIX   0
RU6   6    0.305349    0.634826    0.681973    11.00000    0.02258    0.28948 =
         0.12251    0.02046    0.01479   -0.04695
AFIX  66
N7    8    0.320505    0.600612    0.628289    11.00000    0.01399
C711  1    0.323687    0.681028    0.600088    11.00000    0.06304
C712  1    0.324296    0.640841    0.564750    11.00000    0.07911
C713  1    0.321723    0.520237    0.557612    11.00000    0.20407
C714  1    0.318541    0.439819    0.585812    11.00000    0.32673
C715  1    0.317932    0.480005    0.621151    11.00000    0.06383
AFIX   0
O3    7    0.351142    0.088891    0.891114    11.00000    0.09899    0.70656 =
         0.08902    0.21100   -0.07079   -0.26309
AFIX  66
N8    8   -0.176069    0.580681    0.870755    11.00000    0.10075
C815  1   -0.183720    0.683956    0.890274    11.00000    0.15073
C814  1   -0.188147    0.679145    0.927493    11.00000    0.34546
C813  1   -0.184922    0.571060    0.945195    11.00000    0.03408
C812  1   -0.177271    0.467784    0.925677    11.00000    0.05915
C811  1   -0.172844    0.472593    0.888457    11.00000    0.06906
AFIX   0
O8    7    0.872764    0.248151    0.604653    11.00000    0.22228
AFIX  66
C613  1    0.133689    0.584407    0.918992    11.00000    0.18675
C614  1    0.126293    0.703123    0.910839    11.00000    0.03374
C615  1    0.115117    0.736735    0.875828    11.00000    0.01433
N6    8    0.111336    0.651631    0.848970    11.00000    0.07834
C611  1    0.118732    0.532914    0.857123    11.00000    0.18122
C612  1    0.129908    0.499301    0.892133    11.00000   -0.00100
AFIX   0
O7    7    0.840298    0.062503    0.614335    11.00000    0.04891
AFIX  66
N5    8    0.614880    0.648082    0.650022    11.00000    0.10394
C515  1    0.623748    0.730513    0.623049    11.00000    0.06563
C514  1    0.633266    0.692710    0.588168    11.00000    0.08632
C513  1    0.633915    0.572475    0.580260    11.00000   -0.00100
C512  1    0.625046    0.490043    0.607233    11.00000    0.06640
C511  1    0.615529    0.527844    0.642114    11.00000    0.05420
AFIX   0
O5    7    0.847001    0.089433    0.480362    11.00000    0.12152
AFIX  66
C304  1    0.879512    0.039637    0.392865    11.00000    0.74818
C305  1    0.869202    0.156860    0.384445    11.00000    0.05848
C306  1    0.905364    0.242446    0.387342    11.00000    0.26229
C301  1    0.951837    0.210811    0.398658    11.00000    0.03895
C302  1    0.962147    0.093588    0.407078    11.00000    0.08001
C303  1    0.925985    0.008001    0.404182    11.00000    0.02917
AFIX   0
O2    7    0.429422    0.267051    1.030416    11.00000    0.03197    0.07795 =
         0.33240    0.03002    0.10327    0.01795
AFIX  66
N3    8    0.822612    0.245962    0.455492    11.00000    0.13952
C315  1    0.781342    0.186606    0.467483    11.00000    0.17558
C314  1    0.741784    0.250153    0.480585    11.00000    1.64375
C313  1    0.743496    0.373057    0.481696    11.00000    0.37351
C312  1    0.784765    0.432414    0.469705    11.00000    0.29600
C311  1    0.824324    0.368868    0.456603    11.00000    0.10215
AFIX   0
C107  1    0.488519    0.017693    1.089118    11.00000    0.07663
O14   7    0.373341    0.720909    0.683267    11.00000    0.15487
CO2   5    0.634854    0.401671    0.513461    11.00000    0.02437    0.07572 =
         0.17583   -0.00645   -0.00186    0.00567
O132  7    0.628160    0.682937    0.508240    11.00000    0.07086
O123  7    0.409445    0.741192    0.861544    11.00000    0.01395    0.08556 =
         0.60956    0.18652   -0.09551   -0.02978
O39   7    0.345621    0.560930    0.803861    11.00000    0.11011
O9    7    0.548894    0.573992    0.696556    11.00000    0.10725
O1    7    0.366775    0.056849    1.022396    11.00000    0.04178    0.12734 =
         0.07291    0.07487    0.05173    0.03383
RU4   6   -0.195266    0.631126    0.818450    11.00000    0.02232    0.29805 =
         0.11432    0.02023    0.00750   -0.02554
O12   7    0.048762    0.594574    0.783214    11.00000    0.50137
O11   7    0.049606    0.811740    0.815802    11.00000    0.08753
O16   7   -0.141438    0.753644    0.824886    11.00000    0.04270
O15   7   -0.139507    0.511962    0.812595    11.00000    0.08017
F5    3    0.323341    0.744075    0.856537    11.00000    0.27686
C108  1    0.497623    0.003997    1.052774    11.00000    0.07406
C109  1    0.510498   -0.084248    1.114733    11.00000    0.11979
F4    3    0.328683    0.807268    0.817588    11.00000    0.17418
C557  1    0.833492    0.082421    0.386793    11.00000    0.10797
O81   7    0.345390    0.685364    0.827382    11.00000    0.02173
C586  1    0.408259    0.201569    0.803479    11.00000    0.06819
O64   7    0.852108    0.647775    0.675408    11.00000    0.00940
C640  1    0.564295    0.246650    0.806038    11.00000    0.11196
S12   4    0.833304    0.758783    0.706756    11.00000    0.06257    0.06178 =
         0.95611    0.13809    0.01868    0.04716
O181  7    0.849716    0.676258    0.633980    11.00000    0.14091
C507  1    0.603597    0.871714    0.782300    11.00000    0.38594
S7    4    0.885131    0.640718    0.391230    11.00000    0.24669
S8    4    0.331363    0.136773    0.619857    11.00000    0.22318
O103  7    0.326642    0.149133    0.581316    11.00000    0.08031
O151  7    0.403864    0.092810    0.628297    11.00000    0.11727
O161  7    0.368130    0.012193    0.589660    11.00000    0.23453
O114  7    0.429848    0.778770    0.830255    11.00000    0.19650
O115  7    0.907619    0.621256    0.429695    11.00000    0.36810
O116  7    0.822610    0.242101    0.363797    11.00000    0.18901
S9    4    0.837328    0.090183    0.879402    11.00000    0.03031    0.40355 =
         0.40504    0.12950   -0.08979   -0.03986
O119  7    0.957008    0.676312    0.381993    11.00000    0.23394
O118  7    0.654067    0.358506    0.763922    11.00000    0.20173
C754  1    0.406872    0.152477    0.671939    11.00000    0.11177
C452  1    0.919478    0.743014    0.725981    11.00000    0.11781
C451  1    0.845963    0.040624    0.700380    11.00000    0.07125
O131  7    0.887366    0.750955    0.354998    11.00000    0.14001
C91   1    0.453873    0.038714    0.735662    11.00000    0.17245
O183  7    0.823453   -0.014732    0.874795    11.00000    0.14748
C651  1    0.340795    0.846657    0.770585    11.00000    0.10646
C436  1    0.993511    0.918936    0.440825    11.00000    0.19790
C437  1    0.964822    0.124690    0.628126    11.00000    0.15840
O6    7    0.915360    0.244701    0.480240    11.00000    0.10933
C558  1    0.903937    0.571409    0.657243    11.00000    0.02740
F14   3    0.940577    0.754152    0.677480    11.00000    0.23952
F15   3    0.969888    0.689399    0.529630    11.00000    0.35639
F16   3    0.902222    0.639125    0.698431    11.00000    0.20787
O4    7    0.387629    0.297792    0.880486    11.00000    0.03484
O83   7    0.477037    0.046780    0.669098    11.00000    0.28521
O10   7    0.545346    0.822207    0.700001    11.00000    2.00000
O13   7    0.348917    0.401878    0.665727    11.00000    1.52694
O551  7    0.122193    0.674504    0.990101    11.00000    0.07961
C556  1    0.375140    0.677194    0.101114    11.00000    0.01771
HKLF 4

REM  yj03-17 in P2
REM R1 =  0.2340 for    7536 Fo > 4sig(Fo)  and  0.2832 for all   11489 data
REM    657 parameters refined using     52 restraints

END

WGHT      0.2000      0.0000

REM Highest difference peak  1.629,  deepest hole -1.725,  1-sigma level  0.321
Q1    1   0.1251  0.1841  0.8531  11.00000  0.05    1.63
Q2    1   0.3862  0.6855  0.0706  11.00000  0.05    1.58
Q3    1   0.8804  0.0334  0.4762  11.00000  0.05    1.57
Q4    1   0.6148  0.1933  0.6529  11.00000  0.05    1.55
Q5    1   0.6186  0.1268  0.6383  11.00000  0.05    1.48
Q6    1   0.8877  0.1583  0.4870  11.00000  0.05    1.36
Q7    1   0.3892  0.6661  0.1288  11.00000  0.05    1.33
Q8    1   0.0882  1.0953  0.8074  11.00000  0.05    1.32
Q9    1   0.8798  0.2544  0.8759  11.00000  0.05    1.26
Q10   1   0.6267  0.2001  0.7201  11.00000  0.05    1.23
Q11   1   0.1123  1.1811  0.7631  11.00000  0.05    1.22
Q12   1   0.1016  0.2609  0.7571  11.00000  0.05    1.21
Q13   1   0.6176  0.2515  0.6880  11.00000  0.05    1.20
Q14   1   0.1542  0.0323  0.9169  11.00000  0.05    1.16
Q15   1   0.1089  0.3721  0.8109  11.00000  0.05    1.14
Q16   1   0.2880  0.1813  0.6383  11.00000  0.05    1.09
Q17   1   0.4645  0.5297  0.1107  11.00000  0.05    1.08
Q18   1   0.8901  0.3532  0.4621  11.00000  0.05    1.06
Q19   1   0.1135  0.5367  0.8000  11.00000  0.05    1.05
Q20   1   0.6125  0.0785  0.5112  11.00000  0.05    1.04
Q21   1   0.1481  0.3559  0.7711  11.00000  0.05    1.04
Q22   1   0.5881  0.1573  0.7100  11.00000  0.05    1.03
Q23   1   0.6180  0.5170  0.6967  11.00000  0.05    1.02
Q24   1   0.8758  0.2787  0.2950  11.00000  0.05    1.01
Q25   1   0.7513  0.7077  0.5986  11.00000  0.05    0.99
Q26   1   0.4638 -0.2686  1.1189  11.00000  0.05    0.99
Q27   1   0.1110  1.0325  0.7661  11.00000  0.05    0.97
Q28   1   0.5805  0.1258  0.7017  11.00000  0.05    0.97
Q29   1   0.6156  1.0443  0.6800  11.00000  0.05    0.96
Q30   1   0.1391  0.3162  0.7534  11.00000  0.05    0.96
;
_shelx_res_checksum   26352

_shelx_hkl_file
;
   0   1   0    5.64    0.43
   0  -1   0    4.39    0.37
   0   2   0  423.81   26.20
   0   2   0  370.62   23.25
   0   2   0  356.61   27.36
   0  -2   0  405.08   26.20
   0  -2   0  376.65   23.25
   0  -2   0  375.65   27.36
   0   3   0   18.52    1.46
   0   3   0   15.88    1.15
   0  -3   0   16.64    1.33
   0  -3   0   16.06    1.16
   0  -3   0   15.49    1.44
   0   4   0   67.48    4.30
   0  -4   0   58.96    3.73
   0  -4   0   54.39    4.37
   0   5   0   11.14    1.23
   0  -5   0    7.90    0.98
   0  -5   0    8.55    0.87
   0   6   0    7.22    1.32
   0  -6   0    6.57    0.84
   0   7   0    2.07    1.37
   0  -7   0    1.17    0.80
  -1  -7   0    2.62    0.87
  -1  -6   0    0.26    0.71
   1   6   0    3.64    1.19
  -1  -5   0    0.97    0.58
  -1  -5   0    0.44    0.60
   1   5   0    0.74    0.95
  -1  -4   0    2.21    0.63
  -1  -4   0    2.87    0.58
   1   4   0    3.98    0.96
  -1  -3   0    2.17    0.73
  -1  -3   0    1.67    0.49
  -1  -3   0    1.08    0.46
   1   3   0    2.19    0.48
   1   3   0    2.09    0.50
   1   3   0    1.88    0.84
   1   2   0    6.90    0.62
   1   2   0    9.64    0.71
  -1  -1   0    0.49    0.10
  -1  -1   0    0.37    0.10
  -1  -1   0    0.04    0.19
   1   1   0    0.52    0.12
   1   1   0   -0.16    0.16
  -1   0   0   -0.01    0.01
   1   0   0   -0.02    0.02
  -1   1   0    0.00    0.06
  -1   1   0    0.20    0.07
   1  -1   0    0.24    0.14
  -1   2   0    8.22    0.63
  -1   3   0    2.15    0.69
  -1   3   0    1.85    0.49
   1  -3   0    1.87    0.66
   1  -3   0    1.23    0.44
   1  -3   0    1.11    0.46
  -1   4   0    2.69    0.88
   1  -4   0    0.91    0.56
   1  -4   0    1.37    0.52
  -1   5   0   -0.06    0.88
   1  -5   0    1.38    0.58
   1  -5   0    0.66    0.64
  -1   6   0    1.84    1.13
   1  -6   0    0.82    0.72
  -1   7   0    2.39    1.28
   1  -7   0    3.43    0.84
   1  -8   0    4.47    1.03
  -2  -8   0    1.17    0.97
  -2  -7   0    3.71    0.94
   2   7   0    4.27    1.48
  -2  -6   0    1.97    0.77
   2   6   0    0.50    1.19
  -2  -5   0    4.54    0.77
  -2  -5   0    7.13    0.81
   2   5   0    6.73    0.87
   2   5   0    5.79    1.14
  -2  -4   0    9.94    0.90
  -2  -4   0    9.36    1.01
   2   4   0   13.20    1.36
   2   4   0    8.84    1.02
  -2  -3   0    1.64    0.51
  -2  -3   0    1.10    0.51
  -2  -3   0    3.05    0.80
   2   3   0    3.75    0.96
   2   3   0    2.22    0.56
   2   3   0    2.80    0.51
  -2  -2   0    1.71    0.53
  -2  -2   0    0.83    0.33
  -2  -2   0    0.53    0.31
   2   2   0    1.83    0.34
   2   2   0    2.09    0.60
   2   2   0    1.53    0.32
  -2  -1   0    2.40    0.23
  -2  -1   0    2.40    0.35
  -2  -1   0    2.35    0.23
   2   1   0    1.95    0.23
   2   1   0    2.01    0.23
   2   1   0    2.71    0.27
   2   1   0    2.29    0.36
   2   0   0    6.34    0.49
  -2   1   0    2.69    0.21
   2  -1   0    2.57    0.23
   2  -1   0    2.07    0.23
  -2   2   0    1.09    0.35
  -2   2   0    1.84    0.32
   2  -2   0    0.19    0.36
   2  -2   0    0.69    0.33
  -2   3   0    1.80    0.62
  -2   3   0    1.34    0.50
   2  -3   0    2.20    0.63
   2  -3   0    1.27    0.48
  -2   4   0    9.28    1.03
   2  -4   0    8.90    0.83
   2  -4   0   10.13    1.09
   2  -4   0    7.02    0.90
  -2   5   0    5.97    0.94
   2  -5   0    4.08    0.67
   2  -5   0    5.00    0.70
  -2   6   0   -0.43    0.97
   2  -6   0    0.37    0.72
   2  -7   0    3.23    0.90
   2  -8   0    0.96    0.91
  -3  -7   0    3.33    0.92
  -3  -6   0    0.51    0.69
   3   6   0    1.82    1.28
  -3  -5   0    1.54    0.62
  -3  -5   0    0.19    0.58
   3   5   0   -0.11    1.12
   3   5   0    1.75    0.71
  -3  -4   0    0.48    0.53
  -3  -4   0    1.72    0.56
   3   4   0    0.76    0.57
   3   4   0    2.71    1.17
  -3  -3   0   11.54    1.01
  -3  -3   0   10.89    0.87
  -3  -3   0    8.29    1.20
   3   3   0   12.38    1.35
   3   3   0   10.68    1.04
   3   3   0   10.95    0.90
   3   3   0    9.64    0.86
  -3  -2   0   10.74    0.97
  -3  -2   0   10.13    0.84
   3   2   0    8.50    1.15
   3   2   0   12.48    0.84
   3   2   0   14.65    0.99
   3   2   0   11.94    0.83
  -3  -1   0    3.16    0.33
  -3  -1   0    3.05    0.33
   3   1   0    3.81    0.33
   3   1   0    4.40    0.33
  -3   0   0    0.09    0.09
  -3   0   0   -0.15    0.08
  -3   0   0    0.07    0.11
   3   0   0   -0.08    0.13
   3   0   0   -0.11    0.12
   3   0   0    0.26    0.11
   3   0   0    0.07    0.08
   3  -1   0    4.75    0.37
  -3   2   0   13.09    1.07
  -3   2   0   16.09    0.99
  -3   3   0    8.45    0.92
  -3   3   0   11.19    0.83
   3  -3   0    9.71    0.81
   3  -3   0    8.25    0.95
  -3   4   0    1.05    0.64
   3  -4   0    0.72    0.54
   3  -4   0    1.08    0.70
  -3   5   0    0.72    0.76
   3  -5   0    0.03    0.52
   3  -5   0    0.06    0.59
  -3   6   0    0.16    0.87
   3  -6   0    0.01    0.66
  -4  -8   0    5.37    1.07
   4   8   0    4.77    1.15
  -4  -7   0    1.36    0.84
   4   7   0    0.48    1.43
   4   7   0    2.25    0.93
  -4  -6   0    5.86    0.89
   4   6   0    6.99    0.94
   4   6   0    9.08    1.50
  -4  -5   0    0.64    0.62
   4   5   0    2.86    0.69
   4   5   0    2.04    0.71
   4   5   0    4.26    1.32
  -4  -4   0   13.60    1.28
  -4  -4   0   13.76    1.12
   4   4   0   13.11    1.29
   4   4   0   13.96    1.13
   4   4   0   18.85    1.66
  -4  -3   0    1.39    0.53
  -4  -3   0    2.77    0.55
   4   3   0    2.59    0.64
   4   3   0    3.79    1.05
   4   3   0    2.09    0.55
   4   3   0    1.54    0.54
  -4  -2   0  165.34   10.08
  -4  -2   0  177.72   11.43
  -4  -2   0  165.31   10.08
   4   2   0  159.72   10.08
   4   2   0  162.69   11.87
   4   2   0  158.46   10.08
   4   2   0  174.85   11.43
  -4  -1   0   52.84    3.13
  -4  -1   0   50.68    3.13
  -4  -1   0   53.81    3.57
   4   1   0   50.04    3.56
   4   1   0   48.62    3.12
   4   1   0   50.72    3.56
   4   1   0   50.15    3.12
  -4   0   0  984.14   58.70
  -4   0   0  933.90   64.99
  -4   0   0  982.10   66.08
   4   0   0  952.97   64.99
   4   0   0  963.32   58.70
   4   0   0  989.28   66.09
   4   0   0 1000.00   66.09
  -4   1   0   43.68    3.26
  -4   1   0   51.21    3.31
  -4   1   0   48.09    2.96
   4  -1   0   49.06    3.26
   4  -1   0   49.85    2.96
  -4   2   0  167.18   10.31
  -4   2   0  167.96   11.59
   4  -2   0  172.91   11.59
   4  -2   0  172.18   10.32
  -4   3   0    0.42    0.47
  -4   3   0    1.53    0.49
   4  -3   0    1.72    0.50
   4  -3   0    1.31    0.57
  -4   4   0   13.89    1.26
   4  -4   0   15.33    1.30
   4  -4   0   14.76    1.13
  -4   5   0    1.60    0.73
   4  -5   0    2.23    0.64
  -4   6   0    7.63    1.07
   4  -6   0    6.45    0.90
   4  -7   0    0.45    0.79
  -5  -8   0    3.15    1.02
   5   8   0    4.17    1.15
  -5  -7   0    2.36    0.94
   5   7   0    4.24    1.02
   5   7   0    3.58    1.60
  -5  -6   0    5.60    0.91
   5   6   0    7.69    0.94
   5   6   0    5.35    1.55
  -5  -5   0    2.62    0.71
   5   5   0    2.87    1.34
   5   5   0    2.55    0.78
  -5  -4   0    2.40    0.59
  -5  -4   0    1.34    0.58
   5   4   0    2.97    0.68
   5   4   0    1.21    0.60
   5   4   0    0.66    1.09
  -5  -3   0    2.48    0.57
   5   3   0    4.25    0.69
   5   3   0    4.45    1.09
   5   3   0    3.15    0.59
   5   3   0    2.93    0.59
  -5  -2   0    4.50    1.00
  -5  -2   0    7.98    0.72
  -5  -2   0    8.50    0.73
   5   2   0    6.28    1.14
   5   2   0   10.23    0.73
  -5  -1   0    0.89    0.30
  -5  -1   0    0.44    0.51
  -5  -1   0    0.54    0.30
   5   1   0    0.10    0.53
   5   1   0    1.39    0.33
   5   1   0    0.37    0.32
   5   1   0    0.34    0.47
  -5   0   0    0.76    0.23
  -5   0   0   -0.14    0.30
  -5   0   0    0.52    0.25
   5   0   0    0.59    0.26
   5   0   0   -0.06    0.30
   5   0   0    0.41    0.25
   5   0   0    0.79    0.24
  -5   1   0    0.74    0.25
  -5   1   0    0.90    0.29
  -5   1   0    1.18    0.28
   5  -1   0    0.82    0.23
   5  -1   0    1.25    0.31
  -5   2   0   11.20    0.91
  -5   2   0   13.42    0.89
  -5   3   0    2.43    0.49
  -5   3   0    2.41    0.52
   5  -3   0    2.20    0.57
   5  -3   0    3.77    0.56
  -5   4   0    0.51    0.52
   5  -4   0    0.99    0.61
   5  -4   0    1.47    0.55
  -5   5   0    0.61    0.66
   5  -5   0    1.54    0.65
  -5   6   0    4.65    0.96
   5  -6   0    5.50    0.88
   5  -7   0    2.91    0.89
   6   8   0    2.03    1.12
  -6  -7   0    1.91    0.94
   6   7   0    4.32    0.99
  -6  -6   0    1.85    0.79
   6   6   0    3.03    1.56
   6   6   0    4.02    0.90
  -6  -5   0    8.62    0.94
   6   5   0   11.12    1.63
   6   5   0    8.53    0.99
  -6  -4   0    4.85    0.70
   6   4   0    6.29    0.75
   6   4   0    9.38    1.30
  -6  -3   0    4.07    0.67
   6   3   0    7.26    0.71
   6   3   0    5.70    1.22
   6   3   0    6.94    0.84
  -6  -2   0   82.80    5.17
  -6  -2   0   83.08    5.93
  -6  -2   0   86.12    5.17
   6   2   0   84.84    5.94
   6   2   0   87.24    5.92
   6   2   0   82.51    5.17
   6   2   0   83.02    5.17
  -6  -1   0    3.93    0.73
  -6  -1   0    3.96    0.48
   6   1   0    3.79    0.51
   6   1   0    4.95    0.51
   6   1   0    3.47    0.77
   6   1   0    3.04    0.68
  -6   0   0    6.47    0.79
  -6   0   0   10.24    0.72
  -6   0   0    8.75    0.67
   6   0   0    6.85    0.73
   6   0   0    8.83    0.68
   6   0   0    6.50    0.79
   6   0   0    9.13    0.72
  -6   1   0    5.32    0.51
  -6   1   0    3.20    0.45
   6  -1   0    4.45    0.48
   6  -1   0    5.05    0.49
   6  -1   0    3.69    0.43
  -6   2   0   76.49    5.28
  -6   2   0   79.22    4.80
   6  -2   0   79.29    4.80
  -6   3   0    4.72    0.59
  -6   3   0    6.09    0.62
   6  -3   0    4.68    0.64
  -6   4   0    4.62    0.63
   6  -4   0    4.67    0.65
   6  -4   0    3.08    0.69
  -6   5   0    8.04    0.94
   6  -5   0    8.95    0.93
  -6   6   0    1.79    0.78
   6  -6   0    2.82    0.81
  -7  -8   0    2.18    1.01
   7   8   0    2.22    1.11
  -7  -7   0    4.23    0.94
  -7  -6   0    0.34    0.72
   7   6   0    1.29    1.66
   7   6   0    2.53    0.83
  -7  -5   0    3.77    0.75
   7   5   0    6.45    0.86
   7   5   0    6.06    1.47
  -7  -4   0    3.78    0.64
   7   4   0    4.72    0.70
   7   4   0    5.18    1.24
  -7  -3   0    3.40    0.62
   7   3   0    4.97    0.68
   7   3   0    5.90    1.20
   7   3   0    5.92    0.81
  -7  -2   0    4.60    0.62
  -7  -2   0    4.30    0.61
   7   2   0    4.42    0.65
   7   2   0    5.79    0.68
   7   2   0    6.49    1.11
  -7  -1   0    2.67    0.79
  -7  -1   0    4.60    0.55
   7   1   0    3.49    0.74
   7   1   0    5.91    0.60
   7   1   0    4.46    0.87
  -7   0   0    0.74    0.52
  -7   0   0    0.40    0.35
  -7   0   0    0.27    0.38
   7   0   0   -0.13    0.38
   7   0   0    0.46    0.53
   7   0   0    0.18    0.34
   7   0   0    0.61    0.39
  -7   1   0    3.71    0.58
  -7   1   0    7.26    0.62
   7  -1   0    5.61    0.56
   7  -1   0    6.85    0.64
  -7   2   0    6.01    0.59
  -7   2   0    5.26    0.59
   7  -2   0    4.42    0.60
  -7   3   0    4.12    0.49
  -7   3   0    4.25    0.59
  -7   3   0    4.85    0.52
   7  -3   0    3.71    0.62
   7  -3   0    2.88    0.56
  -7   4   0    3.08    0.58
   7  -4   0    3.85    0.64
   7  -4   0    2.54    0.64
  -7   5   0    4.73    0.76
   7  -5   0    5.09    0.81
   7  -6   0    0.87    0.77
  -7   7   0    3.21    0.92
  -8  -8   0    4.17    1.06
  -8  -7   0    2.23    0.89
   8   7   0    2.91    1.03
  -8  -6   0    6.96    0.99
   8   6   0    8.72    1.09
  -8  -5   0    4.17    0.77
   8   5   0    4.27    1.47
   8   5   0    4.95    0.81
  -8  -4   0   13.20    1.22
   8   4   0   15.51    1.23
   8   4   0   20.18    1.84
  -8  -3   0    8.95    0.88
   8   3   0    9.36    0.90
   8   3   0   11.20    1.39
  -8  -2   0    7.91    0.88
  -8  -2   0    8.20    0.87
   8   2   0   11.48    0.93
   8   2   0    9.74    1.31
   8   2   0   10.87    0.92
  -8  -1   0   22.95    1.75
  -8  -1   0   21.67    1.48
   8   1   0   22.62    1.73
   8   1   0   22.59    1.82
   8   1   0   21.26    1.49
   8   1   0   20.38    1.49
   8   1   0   20.40    1.57
  -8   0   0   76.57    5.48
  -8   0   0   82.71    5.61
  -8   0   0   80.73    4.98
   8   0   0   85.88    5.62
   8   0   0   79.83    5.48
   8   0   0   80.76    4.97
   8   0   0   80.08    5.58
  -8   1   0   18.34    1.31
  -8   1   0   19.74    1.42
  -8   1   0   18.12    1.41
   8  -1   0   18.03    1.38
   8  -1   0   18.57    1.31
   8  -1   0   20.28    1.40
  -8   2   0   11.24    0.89
  -8   2   0   11.19    0.89
   8  -2   0    9.29    0.89
  -8   3   0    7.99    0.75
  -8   3   0    8.15    0.78
   8  -3   0    9.20    0.83
   8  -3   0    9.96    0.81
  -8   4   0   13.70    1.12
   8  -4   0   11.33    1.16
   8  -4   0   15.28    1.14
  -8   5   0    4.27    0.73
   8  -5   0    3.73    0.79
   8  -6   0    7.66    1.04
   9   8   0    3.63    1.20
  -9  -7   0    2.10    0.97
   9   7   0    3.61    1.08
  -9  -6   0    4.66    0.88
   9   6   0    5.41    1.95
   9   6   0    4.94    0.97
  -9  -5   0    3.33    0.75
   9   5   0    3.11    0.85
   9   5   0    0.92    1.45
  -9  -4   0    1.66    0.64
   9   4   0    2.05    0.73
   9   4   0    3.01    1.30
  -9  -3   0    9.36    0.94
   9   3   0   10.94    1.42
   9   3   0    9.96    0.94
  -9  -2   0    3.98    0.59
   9   2   0    4.76    0.67
   9   2   0    1.61    1.09
  -9  -1   0    2.37    0.52
  -9  -1   0    1.45    0.74
   9   1   0    1.80    0.60
   9   1   0    1.54    0.71
   9   1   0    3.50    0.55
   9   1   0    3.48    0.89
   9   1   0    2.58    0.56
  -9   0   0    0.18    0.46
  -9   0   0    0.40    0.43
  -9   0   0    0.91    0.67
   9   0   0    0.62    0.65
   9   0   0    0.50    0.47
   9   0   0    0.25    0.40
   9   0   0    0.66    0.49
  -9   1   0    3.75    0.52
  -9   1   0    3.45    0.57
  -9   1   0    2.49    0.51
   9  -1   0    2.31    0.46
   9  -1   0    1.95    0.45
   9  -1   0    2.33    0.53
  -9   2   0    6.35    0.68
  -9   2   0    5.18    0.62
   9  -2   0    4.71    0.65
   9  -2   0    5.22    0.59
  -9   3   0    9.37    0.82
  -9   3   0    9.14    0.83
   9  -3   0   10.32    0.89
  -9   4   0    2.61    0.54
  -9   4   0    3.10    0.52
   9  -4   0    1.22    0.68
   9  -4   0    1.05    0.58
  -9   5   0    1.04    0.63
   9  -5   0    2.59    0.76
   9  -6   0    5.46    1.01
 -10  -8   0    0.93    0.95
 -10  -7   0    3.64    1.02
  10   7   0    3.82    1.13
 -10  -6   0    7.92    1.10
  10   6   0    8.28    1.14
 -10  -5   0    5.03    0.85
  10   5   0    4.28    1.60
  10   5   0    4.74    0.89
 -10  -4   0    6.96    0.90
  10   4   0   10.37    1.57
  10   4   0    9.16    1.03
 -10  -3   0    9.84    0.97
  10   3   0   11.61    1.50
  10   3   0   10.17    0.99
  10   2   0   41.21    3.02
  10   2   0   37.14    2.53
  10   1   0   13.95    1.41
  10   1   0   13.00    1.08
  10   1   0   11.63    1.09
  10   1   0   13.43    1.14
 -10   0   0   12.89    1.37
 -10   0   0   13.90    1.14
 -10   0   0   16.96    1.22
  10   0   0   16.75    1.16
  10   0   0   16.58    1.20
  10   0   0   12.16    1.24
  10   0   0   13.73    1.39
 -10   1   0   10.10    0.99
 -10   1   0   11.43    0.98
 -10   1   0    9.28    0.88
  10  -1   0   10.51    0.92
  10  -1   0   10.93    0.91
  10  -1   0   11.14    0.93
 -10   2   0   32.00    2.29
  10  -2   0   34.02    2.14
  10  -2   0   31.57    2.27
  10  -2   0   33.01    2.31
 -10   3   0   10.96    0.96
  10  -3   0   10.72    1.00
 -10   4   0    8.88    0.83
 -10   4   0    7.99    0.84
  10  -4   0    8.33    0.96
 -10   5   0    5.09    0.71
 -10   5   0    5.30    0.76
  10  -5   0    5.94    0.91
  10  -6   0    5.89    1.04
  11   7   0    5.78    1.21
 -11  -6   0    4.18    0.97
  11   6   0    5.12    1.03
 -11  -5   0    2.59    0.80
  11   5   0    3.55    0.95
  11   5   0    7.61    1.73
 -11  -4   0    0.54    0.66
  11   4   0    1.95    0.77
  11   4   0    2.80    1.39
 -11  -3   0    2.58    0.63
  11   3   0    1.69    1.24
  11   3   0    2.22    0.70
  11   2   0    9.42    0.90
  11   2   0    7.06    1.26
  11   1   0   -0.05    0.85
  11   1   0    1.13    0.56
  11   1   0    1.29    0.56
 -11   0   0   -0.39    0.72
 -11   0   0    0.20    0.46
  11   0   0   -0.01    0.52
  11   0   0   -0.11    0.43
  11   0   0    0.21    0.49
  11   0   0    0.04    0.74
 -11   1   0    0.09    0.58
 -11   1   0    2.23    0.50
  11  -1   0    0.22    0.44
  11  -1   0    1.41    0.55
  11  -1   0    1.71    0.42
  11  -1   0    0.52    0.54
 -11   2   0    8.73    0.79
 -11   2   0    6.96    0.79
  11  -2   0    6.85    0.80
  11  -2   0    7.07    0.72
  11  -2   0    8.04    0.73
 -11   3   0    2.34    0.53
  11  -3   0    1.90    0.66
 -11   4   0    2.78    0.57
  11  -4   0    2.90    0.75
 -11   5   0    6.17    0.77
 -11   5   0    4.63    0.71
  11  -5   0    2.88    0.92
 -11   6   0    4.66    0.81
  11  -6   0    2.32    0.98
 -12  -7   0    0.85    0.96
  12   7   0    0.10    1.07
 -12  -6   0    3.27    0.93
  12   6   0    3.56    1.09
 -12  -5   0    2.44    0.83
  12   5   0    1.51    1.67
  12   5   0    3.85    0.95
 -12  -4   0   10.20    1.13
  12   4   0   11.97    1.21
  12   4   0   13.06    1.82
 -12  -3   0    6.98    0.90
  12   3   0    9.78    0.99
  12   3   0    8.97    1.54
  12   2   0    4.08    0.76
  12   2   0    4.59    1.20
  12   2   0    4.80    0.61
  12   1   0    3.40    1.01
  12   1   0    3.78    0.68
  12   1   0    4.01    0.70
 -12   0   0    4.00    0.87
 -12   0   0    2.96    0.57
  12   0   0    3.08    0.54
  12   0   0    3.67    0.64
  12   0   0    3.91    0.87
 -12   1   0    2.99    0.60
 -12   1   0    4.18    0.74
  12  -1   0    2.83    0.68
  12  -1   0    3.11    0.51
  12  -1   0    4.12    0.66
  12  -1   0    4.17    0.58
 -12   2   0    5.70    0.71
  12  -2   0    5.97    0.68
  12  -2   0    6.01    0.79
 -12   3   0    8.12    0.89
  12  -3   0    8.53    0.95
 -12   4   0   11.88    1.07
  12  -4   0   11.52    1.17
 -12   5   0    3.12    0.68
  12  -5   0    0.88    0.88
 -12   6   0    3.56    0.80
 -13  -7   0    2.19    1.04
  13   7   0    1.37    1.14
 -13  -6   0    0.47    0.89
  13   6   0    2.06    1.07
 -13  -5   0    6.91    1.01
  13   5   0    6.29    1.11
 -13  -4   0    3.73    0.78
  13   4   0    3.00    0.86
 -13  -3   0    6.98    0.90
  13   3   0    8.01    1.50
  13   3   0    7.47    0.98
  13   2   0    1.48    0.56
  13   2   0    1.02    0.68
  13   2   0    2.16    1.17
  13   1   0    3.55    0.70
  13   1   0    0.00    1.02
  13   1   0    1.22    0.65
 -13   0   0    0.29    0.52
 -13   0   0   -0.51    0.83
  13   0   0    0.24    0.48
  13   0   0   -0.77    0.85
  13   0   0    0.49    0.62
 -13   1   0    1.72    0.74
 -13   1   0    2.76    0.59
  13  -1   0    1.69    0.72
  13  -1   0    3.49    0.67
  13  -1   0    1.07    0.54
 -13   2   0    1.01    0.63
 -13   2   0    1.93    0.61
  13  -2   0    2.11    0.71
  13  -2   0    2.13    0.52
 -13   3   0    6.80    0.81
  13  -3   0    7.48    0.95
 -13   4   0    4.57    0.73
  13  -4   0    5.45    0.96
 -13   5   0    6.20    0.84
 -13   6   0    2.88    0.80
 -14  -7   0    0.38    1.00
 -14  -6   0    5.58    1.07
 -14  -5   0    6.11    1.00
  14   5   0    5.28    1.11
 -14  -4   0    5.88    0.93
  14   4   0    6.30    1.04
  14   4   0    7.67    1.74
  14   3   0    5.01    1.47
  14   3   0    5.94    0.95
  14   2   0   41.95    3.07
  14   2   0   41.58    2.84
  14   2   0   45.97    3.44
  14   1   0    3.60    1.16
  14   1   0    4.14    0.77
  14   1   0    5.38    0.81
 -14   0   0   12.33    1.44
 -14   0   0   11.42    1.15
  14   0   0   13.33    1.44
  14   0   0   14.22    1.15
 -14   1   0    4.71    0.90
 -14   1   0    4.69    0.73
  14  -1   0    2.98    0.86
  14  -1   0    5.33    0.79
 -14   2   0   33.40    2.50
 -14   2   0   35.34    2.55
  14  -2   0   32.98    2.32
  14  -2   0   35.74    2.49
 -14   3   0    8.34    0.95
  14  -3   0    7.58    1.01
 -14   4   0    6.74    0.89
  14  -4   0    6.99    1.07
 -14   5   0    5.15    0.85
 -14   6   0    4.77    0.88
 -15  -5   0    1.76    0.88
  15   5   0    3.33    1.07
 -15  -4   0    4.85    0.96
  15   4   0    8.51    1.88
  15   4   0    7.70    1.11
  15   3   0    2.40    0.91
  15   2   0    0.59    0.69
  15   2   0    0.65    1.27
  15   2   0   -0.47    0.77
  15   1   0    2.48    0.75
  15   1   0    0.88    1.08
 -15   0   0    0.97    0.59
 -15   0   0    0.66    0.97
  15   0   0    1.98    0.75
  15   0   0    0.66    0.97
 -15   1   0    2.05    0.89
 -15   1   0    2.71    0.68
  15  -1   0    0.90    0.86
  15  -1   0    2.35    0.74
 -15   2   0   -0.37    0.74
 -15   2   0    1.30    0.64
  15  -2   0    0.28    0.77
  15  -2   0    1.28    0.55
  15  -2   0    1.05    0.70
 -15   3   0    0.49    0.68
  15  -3   0    1.79    0.87
 -15   4   0    4.72    0.83
 -15   5   0    4.80    0.88
 -15   6   0    0.56    0.82
 -16  -6   0    0.46    0.96
  16   6   0    1.32    1.12
 -16  -5   0    2.32    0.96
  16   4   0    6.08    1.13
  16   3   0    4.95    1.04
  16   3   0    5.99    0.83
  16   2   0   11.77    1.27
  16   1   0   13.65    1.76
  16   1   0   14.74    1.35
 -16   0   0   15.04    1.24
 -16   0   0   14.92    1.63
  16   0   0   12.90    1.30
  16   0   0    9.88    1.56
 -16   1   0   16.36    1.66
 -16   1   0   18.46    1.54
  16  -1   0   17.53    1.41
  16  -1   0   15.92    1.67
 -16   2   0   10.47    1.21
 -16   2   0   10.27    1.18
  16  -2   0   10.84    1.18
  16  -2   0    9.97    1.18
 -16   3   0    4.99    0.88
  16  -3   0    6.95    1.07
 -16   4   0    5.60    0.94
  16  -4   0    7.34    1.18
 -16   5   0    1.63    0.85
 -16   6   0    2.46    0.90
 -17  -5   0    2.17    0.97
  17   5   0    2.99    1.13
  17   4   0    1.88    1.08
  17   3   0    2.62    1.02
  17   2   0    1.91    0.97
  17   1   0    0.28    1.30
  17   1   0    1.05    0.86
 -17   0   0    0.41    0.63
  17   0   0   -1.50    1.15
  17   0   0    1.11    0.87
 -17   1   0    0.68    0.72
  17  -1   0    3.56    0.88
 -17   2   0    2.50    0.79
  17  -2   0    3.67    0.98
 -17   3   0    2.58    0.83
  17  -3   0    5.00    1.06
 -17   4   0    2.61    0.83
  17  -4   0    1.92    1.08
 -17   5   0    2.40    0.88
  18   4   0    2.17    1.11
  18   3   0    6.54    1.25
  18   2   0   25.16    2.02
  18   1   0   13.56    1.38
  18   0   0   10.24    1.25
 -18   1   0   10.93    1.29
  18  -1   0   13.46    1.33
 -18   2   0   19.77    1.73
  18  -2   0   19.07    1.66
 -18   3   0    5.56    0.97
  18  -3   0    7.42    1.21
 -18   4   0    1.02    0.86
 -18   5   0    4.70    1.02
  19   4   0    4.07    1.21
  19   3   0    1.68    1.16
  19   2   0    2.42    1.11
  19   1   0    2.79    1.06
  19   0   0    2.26    1.01
 -19   1   0    3.47    0.84
  19  -1   0    3.18    1.03
 -19   2   0    0.86    0.86
  19  -2   0    1.98    1.06
 -19   3   0    2.08    0.90
  19  -3   0    3.10    1.12
 -19   4   0    2.63    0.96
 -19   5   0    1.40    0.95
  20   4   0    2.53    1.21
  20   3   0    0.05    1.17
  20   2   0    7.55    1.28
  20   1   0   12.53    1.47
  20   0   0   10.23    1.37
 -20   1   0    8.22    1.13
  20  -1   0   12.92    1.35
 -20   2   0    4.56    1.00
 -20   3   0    1.31    0.91
 -20   4   0    1.14    0.95
  21   3   0    3.58    1.30
  21   2   0    1.76    1.14
  21   1   0    2.82    1.16
  21   0   0    2.78    1.13
 -21   1   0    2.32    0.87
  21  -1   0    2.80    1.13
 -21   2   0    0.93    0.94
  21  -2   0    2.16    1.16
 -21   3   0    1.44    0.94
  22   2   0   13.75    1.59
  22   1   0    4.69    1.25
  22   0   0   11.72    1.51
  22  -1   0    4.85    1.23
 -22   2   0   10.48    1.34
  22  -2   0   14.53    1.60
  22  -2  -1    7.36    1.29
 -22   2   1    4.57    1.02
  22  -1  -1    1.42    1.12
 -22   1   1    2.63    0.91
  22   0  -1    3.70    1.19
  22   1  -1    1.34    1.15
  22   2  -1    5.40    1.29
 -21   3   1    0.02    0.90
 -21   2   1    1.31    0.95
  21  -1  -1    3.78    1.13
 -21   1   1    2.67    0.88
  21   0  -1    9.66    1.34
  21   1  -1    2.95    1.14
  21   2  -1    1.19    1.12
  21   3  -1   -0.51    1.21
 -20   4   1    1.67    0.96
 -20   3   1    1.80    0.92
 -20   2   1    2.31    0.95
  20  -1  -1   13.54    1.44
 -20   1   1   12.17    1.39
  20   0  -1    5.57    1.16
  20   1  -1   11.45    1.42
  20   2  -1    1.93    1.15
  20   3  -1    3.48    1.25
 -19   4   1    4.50    1.00
  19  -3  -1    2.95    1.14
 -19   3   1    3.26    0.93
  19  -2  -1    0.35    1.03
 -19   2   1    0.62    0.86
  19  -1  -1    9.07    1.16
 -19   1   1    5.31    0.96
  19   0  -1   12.44    1.39
  19   1  -1    7.19    1.18
  19   2  -1    0.05    1.09
  19   3  -1    2.87    1.16
  19   4  -1    6.09    1.30
 -18   5   1    2.01    0.91
 -18   4   1    1.65    0.86
  18  -3  -1    3.71    1.12
 -18   3   1    4.70    0.93
  18  -2  -1    8.00    1.16
 -18   2   1    6.32    0.97
  18  -1  -1    6.83    1.06
 -18   1   1    6.21    0.92
  18   0  -1    1.99    0.94
  18   1  -1    5.42    1.05
  18   2  -1    4.29    1.12
  18   3  -1    4.98    1.16
  18   4  -1   -0.51    1.10
  18   5  -1    2.69    1.18
 -18  -5   1    4.07    1.05
 -17   5   1    1.27    0.86
  17  -4  -1    3.82    1.11
 -17   4   1    4.27    0.90
  17  -3  -1    2.08    1.01
 -17   3   1    1.56    0.81
  17  -2  -1    2.07    0.95
 -17   2   1    2.28    0.77
  17  -1  -1    4.30    0.89
 -17   1   1    2.97    0.82
 -17   1   1    4.56    1.17
  17   0  -1    4.58    0.92
 -17   0   1    2.79    0.72
  17   1  -1    4.62    0.98
  17   2  -1    6.40    1.10
  17   3  -1    3.30    1.03
  17   4  -1    2.86    1.09
  17   6  -1    2.05    1.16
 -17  -6   1    0.22    0.94
 -16   6   1    1.26    0.86
 -16   5   1    2.43    0.86
 -16   4   1    4.06    0.86
  16  -3  -1    5.65    1.07
 -16   3   1    5.06    0.87
  16  -2  -1   11.10    1.17
 -16   2   1    8.89    1.04
  16  -1  -1   19.80    1.57
  16  -1  -1   19.54    1.85
 -16   1   1   20.82    1.70
 -16   1   1   20.18    1.85
  16   0  -1   20.15    2.07
  16   0  -1   23.57    1.71
 -16   0   1   22.13    1.75
  16   1  -1   20.52    2.24
  16   1  -1   24.79    1.79
  16   2  -1   10.29    1.18
  16   2  -1    8.54    1.72
  16   3  -1    7.00    1.10
  16   4  -1    2.91    1.07
 -16  -5   1    2.74    0.95
 -15   6   1    1.03    0.82
 -15   5   1    6.41    0.94
 -15   4   1    8.83    1.00
  15  -3  -1    4.23    0.95
 -15   3   1    4.12    0.78
  15  -2  -1    1.17    0.79
 -15   2   1    1.71    0.66
  15  -1  -1    7.34    1.12
  15  -1  -1    7.57    0.93
 -15   1   1    7.66    0.92
 -15   1   1    8.68    1.15
  15   0  -1   11.98    1.15
  15   0  -1   11.03    1.37
 -15   0   1   10.97    1.11
  15   1  -1    8.76    1.42
  15   1  -1    8.78    1.00
  15   2  -1   -0.21    1.27
  15   2  -1    1.58    0.81
  15   2  -1    0.72    0.69
  15   3  -1    3.74    0.94
  15   3  -1    4.16    0.72
  15   3  -1    3.51    1.56
  15   4  -1    9.84    1.22
 -15  -4   1    8.56    1.10
  15   5  -1    5.33    1.11
 -15  -5   1    5.01    0.97
 -15  -6   1   -0.44    0.95
 -14   6   1    5.11    0.88
 -14   5   1    2.76    0.77
  14  -4  -1    5.32    1.02
 -14   4   1    5.57    0.83
  14  -3  -1    9.96    1.10
 -14   3   1    9.27    1.01
  14  -1  -1    7.31    0.86
  14  -1  -1    9.58    0.94
  14  -1  -1    6.24    1.06
 -14   1   1    9.64    1.11
 -14   1   1    7.81    0.89
  14   0  -1   16.68    1.30
  14   0  -1   14.47    1.54
 -14   0   1   15.51    1.34
  14   1  -1   10.16    1.05
  14   1  -1    9.14    1.07
  14   1  -1   10.96    1.44
  14   2  -1    6.68    1.42
  14   2  -1    7.88    0.91
  14   2  -1    8.01    0.97
  14   3  -1   11.10    1.17
  14   3  -1   10.13    1.73
  14   4  -1    4.54    1.68
  14   4  -1    4.12    0.96
 -14  -4   1    5.72    0.88
  14   5  -1    3.75    1.04
 -14  -5   1    2.59    0.93
 -14  -6   1    2.44    1.00
 -14  -7   1    1.25    1.01
 -13   6   1    2.47    0.79
 -13   5   1    5.40    0.81
  13  -4  -1    7.72    1.06
 -13   4   1    8.32    0.93
  13  -3  -1    6.96    0.93
 -13   3   1    6.09    0.77
  13  -2  -1    2.10    0.70
 -13   2   1    2.51    0.61
  13  -1  -1   13.58    1.31
  13  -1  -1   14.71    1.18
  13  -1  -1   13.24    1.14
 -13   1   1   15.35    1.32
 -13   1   1   12.49    1.24
  13   0  -1    7.55    0.85
  13   0  -1    7.29    1.07
  13   0  -1    6.09    0.74
 -13   0   1    6.85    0.79
  13   1  -1   15.82    1.71
  13   1  -1   17.44    1.46
  13   1  -1   17.50    1.36
  13   2  -1    2.10    0.72
  13   2  -1    3.02    1.20
  13   2  -1    1.82    0.59
  13   3  -1    5.15    1.42
  13   3  -1    7.57    0.94
 -13  -3   1    5.46    0.84
  13   4  -1    7.04    1.03
 -13  -4   1    7.24    0.93
  13   5  -1    5.07    1.07
 -13  -5   1    6.09    0.99
 -13  -6   1    2.27    0.92
  13   7  -1    3.57    1.17
 -13  -7   1    2.59    1.01
 -12   6   1    5.08    0.86
 -12   5   1    3.80    0.71
  12  -4  -1   13.49    1.20
 -12   4   1   13.64    1.15
  12  -3  -1    9.88    0.99
 -12   3   1    9.03    0.96
  12  -2  -1    9.87    0.91
  12  -2  -1    8.55    0.81
 -12   2   1    8.22    0.89
  12  -1  -1    4.21    0.66
  12  -1  -1    4.55    0.74
  12  -1  -1    4.15    0.59
  12  -1  -1    3.37    0.53
 -12   1   1    5.26    0.77
 -12   1   1    4.31    0.64
  12   0  -1    7.24    0.98
  12   0  -1    5.32    0.67
  12   0  -1    7.04    0.77
  12   0  -1    6.60    0.77
 -12   0   1    5.65    0.71
 -12   0   1    7.49    1.00
  12   1  -1    3.37    0.70
  12   1  -1    4.65    0.73
  12   1  -1    6.05    1.07
  12   2  -1   12.05    1.08
  12   2  -1   12.29    1.50
  12   2  -1   10.57    1.04
  12   3  -1   10.72    1.03
  12   3  -1    9.25    1.58
 -12  -3   1    8.41    0.95
  12   4  -1   14.48    1.22
  12   4  -1   15.47    1.88
 -12  -4   1   12.06    1.20
  12   5  -1    3.08    0.95
  12   5  -1    4.07    1.75
 -12  -5   1    4.08    0.86
  12   6  -1    3.73    1.10
 -12  -6   1    3.97    0.97
  12   7  -1    3.07    1.13
 -12  -7   1    2.58    0.99
 -11   6   1    4.42    0.80
  11  -5  -1    6.83    0.99
 -11   5   1    5.40    0.75
  11  -4  -1    4.04    0.80
 -11   4   1    3.26    0.59
  11  -3  -1    4.68    0.77
 -11   3   1    5.80    0.66
  11  -2  -1   17.41    1.23
  11  -2  -1   15.63    1.24
 -11   2   1   16.84    1.31
  11  -1  -1    8.97    0.91
  11  -1  -1    8.33    0.80
  11  -1  -1    7.72    0.78
  11  -1  -1    7.97    0.78
 -11   1   1    7.44    0.78
 -11   1   1    8.59    0.89
 -11   1   1    7.98    0.84
  11   0  -1    5.23    0.68
  11   0  -1    4.70    0.61
  11   0  -1    5.54    0.89
  11   0  -1    5.89    0.69
 -11   0   1    5.04    0.66
 -11   0   1    6.58    0.90
 -11   0   1    5.46    0.66
  11   1  -1   10.09    1.02
  11   1  -1    9.70    1.23
  11   1  -1   10.59    0.95
  11   2  -1   18.05    1.84
  11   2  -1   19.23    1.41
  11   3  -1    6.44    0.82
  11   3  -1    4.12    1.31
 -11  -3   1    4.10    0.72
  11   4  -1    5.12    0.84
  11   4  -1    5.52    1.45
 -11  -4   1    3.66    0.77
  11   5  -1    6.56    0.99
 -11  -5   1    6.05    0.91
  11   6  -1    4.11    1.05
 -11  -6   1    4.72    0.95
  11   7  -1    5.16    1.17
 -11  -7   1    5.16    1.08
 -11  -8   1    2.74    1.12
  10  -5  -1    1.93    0.79
  10  -4  -1    6.11    0.90
 -10   4   1    8.39    0.80
  10  -3  -1    6.69    0.82
 -10   3   1    8.36    0.78
  10  -2  -1   28.74    1.88
  10  -2  -1   26.76    1.98
 -10   2   1   28.32    2.02
 -10   2   1   29.50    1.88
  10  -1  -1   11.98    1.02
  10  -1  -1   10.98    1.08
  10  -1  -1   12.35    1.02
  10  -1  -1   12.17    0.97
 -10   1   1   13.49    1.11
 -10   1   1   12.92    0.99
 -10   1   1   13.16    1.07
  10   0  -1   97.67    6.76
  10   0  -1  102.89    6.94
  10   0  -1  104.06    6.15
  10   0  -1  100.38    6.90
 -10   0   1   94.13    6.77
 -10   0   1   95.89    6.13
 -10   0   1  105.45    6.94
  10   1  -1   13.87    1.41
  10   1  -1   11.50    1.04
  10   1  -1   13.73    1.14
  10   1  -1   13.19    1.05
 -10  -1   1   11.99    1.01
  10   2  -1   29.99    2.44
  10   2  -1   28.77    1.98
 -10  -2   1   29.75    1.96
  10   3  -1   10.08    0.98
  10   3  -1   11.78    1.51
  10   4  -1    7.20    1.49
  10   4  -1    6.42    0.92
 -10  -4   1    5.24    0.81
  10   5  -1    2.40    0.82
  10   5  -1    3.92    1.64
 -10  -5   1    2.24    0.76
  10   6  -1    8.63    1.20
 -10  -6   1    7.72    1.11
  10   7  -1    1.57    1.05
 -10  -7   1    2.77    0.92
 -10  -8   1    1.93    1.01
   9  -6  -1    4.50    0.97
   9  -5  -1    1.20    0.72
   9  -5  -1    3.80    0.79
  -9   5   1    3.42    0.66
   9  -4  -1    3.45    0.73
  -9   4   1    4.87    0.60
   9  -3  -1    8.91    0.86
  -9   3   1    9.44    0.81
   9  -2  -1   16.19    1.17
  -9   2   1   15.15    1.14
  -9   2   1   15.76    1.22
   9  -1  -1    6.88    0.74
   9  -1  -1    7.35    0.77
   9  -1  -1    7.76    0.71
   9  -1  -1    7.33    0.73
  -9   1   1    7.09    0.72
  -9   1   1    8.30    0.81
  -9   1   1    8.10    0.81
   9   0  -1    5.09    0.80
   9   0  -1    3.51    0.52
   9   0  -1    3.56    0.59
   9   0  -1    4.83    0.63
  -9   0   1    4.38    0.58
  -9   0   1    4.40    0.79
  -9   0   1    3.71    0.56
   9   1  -1    8.86    0.86
   9   1  -1    9.08    0.91
   9   1  -1    8.67    1.18
   9   1  -1    8.66    0.88
   9   1  -1    7.28    1.00
  -9  -1   1   11.70    1.11
  -9  -1   1    9.70    0.85
   9   2  -1   15.83    1.70
   9   2  -1   17.70    1.28
  -9  -2   1   16.73    1.24
   9   3  -1    9.76    1.36
   9   3  -1    9.07    0.87
  -9  -3   1    7.91    0.85
   9   4  -1    5.99    0.85
   9   4  -1    5.91    1.40
  -9  -4   1    4.25    0.73
   9   5  -1    3.92    0.87
   9   5  -1    5.58    1.63
  -9  -5   1    4.19    0.79
   9   6  -1    6.36    1.03
  -9  -6   1    3.90    0.91
   9   7  -1    3.87    1.09
  -9  -7   1    5.39    1.03
  -9  -8   1    4.84    1.09
   8  -7  -1    0.84    0.96
   8  -6  -1    7.09    1.05
   8  -5  -1    3.93    0.78
   8  -5  -1    0.38    0.71
  -8   5   1    3.28    0.67
   8  -4  -1   18.88    1.31
   8  -4  -1   13.96    1.34
  -8   4   1   16.83    1.28
   8  -3  -1    2.61    0.59
  -8   3   1    3.64    0.48
   8  -2  -1   17.24    1.22
  -8   2   1   17.52    1.29
  -8   2   1   16.86    1.21
   8  -1  -1    6.62    0.67
   8  -1  -1    6.50    0.66
  -8   1   1    6.90    0.68
  -8   1   1    5.02    0.69
  -8   1   1    8.81    0.73
   8   0  -1   56.54    3.88
   8   0  -1   58.20    3.46
   8   0  -1   53.73    3.79
   8   0  -1   56.67    3.92
  -8   0   1   53.23    3.45
  -8   0   1   53.92    3.80
  -8   0   1   56.78    3.92
   8   1  -1    6.55    0.70
   8   1  -1    6.18    0.91
   8   1  -1    6.65    0.72
   8   1  -1    7.26    1.07
   8   1  -1    6.74    0.73
  -8  -1   1    7.34    0.96
  -8  -1   1    7.01    0.70
   8   2  -1   20.72    1.42
   8   2  -1   18.89    1.84
   8   2  -1   18.63    1.41
  -8  -2   1   19.14    1.39
  -8  -2   1   20.57    1.40
   8   3  -1    2.14    0.62
   8   3  -1    2.29    1.10
  -8  -3   1    2.88    0.57
   8   4  -1   21.95    2.07
   8   4  -1   19.39    1.50
  -8  -4   1   20.27    1.51
   8   5  -1    7.20    1.61
   8   5  -1    5.32    0.81
  -8  -5   1    3.04    0.76
   8   6  -1    5.26    0.96
  -8  -6   1    5.34    0.89
   8   7  -1    1.07    1.01
  -8  -7   1    1.67    0.89
   8   8  -1    4.56    1.18
  -7   7   1    2.29    0.88
   7  -6  -1    1.11    0.81
  -7   6   1    2.33    0.71
   7  -5  -1    5.00    0.79
  -7   5   1    5.02    0.77
   7  -4  -1    5.53    0.72
   7  -4  -1    4.79    0.71
  -7   4   1    5.47    0.64
   7  -3  -1    8.75    0.83
  -7   3   1    7.89    0.77
   7  -2  -1    7.07    0.70
  -7   2   1    6.75    0.67
  -7   2   1    7.28    0.65
   7  -1  -1   39.21    2.76
   7  -1  -1   42.62    2.52
  -7   1   1   40.39    2.52
  -7   1   1   39.02    2.77
   7   0  -1    0.71    0.58
   7   0  -1    0.86    0.44
   7   0  -1    0.71    0.35
   7   0  -1    1.04    0.39
  -7   0   1    0.62    0.37
  -7   0   1    0.18    0.38
  -7   0   1    1.17    0.58
  -7   0   1   -0.95    0.44
   7   1  -1   42.41    3.08
   7   1  -1   44.10    3.25
   7   1  -1   44.04    3.29
   7   1  -1   44.18    2.82
   7   1  -1   47.67    2.83
  -7  -1   1   47.00    3.27
  -7  -1   1   45.40    2.81
   7   2  -1    7.57    0.78
   7   2  -1    7.78    0.77
   7   2  -1    7.19    1.18
  -7  -2   1    7.16    0.73
  -7  -2   1    7.46    0.75
   7   3  -1    8.51    1.35
   7   3  -1    8.81    1.02
   7   3  -1    8.15    0.85
  -7  -3   1    8.48    0.83
   7   4  -1    6.99    1.28
   7   4  -1    5.89    0.75
  -7  -4   1    5.00    0.71
   7   5  -1    7.82    0.92
   7   5  -1   11.90    1.67
  -7  -5   1    7.56    0.89
   7   6  -1    2.05    0.85
   7   6  -1    4.07    1.64
  -7  -6   1    2.25    0.80
   7   7  -1    3.61    1.03
  -7  -7   1    4.13    0.96
   6  -6  -1    2.89    0.85
  -6   6   1    3.21    0.79
   6  -5  -1    3.89    0.77
  -6   5   1    2.83    0.66
   6  -4  -1   11.21    0.89
   6  -4  -1    9.98    0.98
  -6   4   1    8.55    0.87
   6  -3  -1   12.16    0.97
  -6   3   1   12.47    0.95
   6  -2  -1   41.00    2.74
  -6   2   1   45.84    2.75
  -6   2   1   44.98    2.99
   6  -1  -1   27.14    1.92
   6  -1  -1   29.12    1.77
  -6   1   1   26.96    1.93
  -6   1   1   28.35    1.77
   6   0  -1  144.61    9.68
   6   0  -1  138.46    9.49
   6   0  -1  138.93    8.58
   6   0  -1  143.32    9.66
  -6   0   1  141.21    8.59
  -6   0   1  145.06    9.67
  -6   0   1  146.34    9.66
  -6   0   1  133.08    9.49
   6   1  -1   30.66    2.06
   6   1  -1   32.94    2.41
   6   1  -1   32.72    2.06
   6   1  -1   33.88    2.45
  -6  -1   1   33.89    2.42
  -6  -1   1   31.86    2.05
  -6  -1   1   32.37    2.06
   6   2  -1   39.81    2.52
   6   2  -1   40.96    3.04
   6   2  -1   42.55    2.51
  -6  -2   1   34.77    2.96
  -6  -2   1   40.05    2.50
  -6  -2   1   38.27    2.51
   6   3  -1   14.53    1.26
   6   3  -1   16.55    1.62
   6   3  -1   12.03    1.04
  -6  -3   1   11.77    1.05
   6   4  -1   14.02    1.58
   6   4  -1   12.19    1.06
  -6  -4   1   11.77    1.01
  -6  -4   1   11.66    1.17
   6   5  -1    7.30    1.49
   6   5  -1    4.21    0.80
  -6  -5   1    4.07    0.76
   6   6  -1    4.44    0.94
   6   6  -1    4.42    1.50
  -6  -6   1    3.26    0.83
   6   7  -1    3.87    1.06
  -6  -7   1    1.32    0.87
  -6  -8   1    2.31    1.02
   5  -7  -1    2.41    0.88
   5  -6  -1    6.74    0.93
  -5   6   1    6.42    0.99
   5  -5  -1    2.23    0.67
  -5   5   1    1.92    0.69
   5  -4  -1    1.61    0.65
   5  -4  -1    3.73    0.60
  -5   4   1    2.26    0.58
   5  -3  -1    5.20    0.67
   5  -3  -1    6.12    0.65
  -5   3   1    4.33    0.57
  -5   3   1    6.06    0.61
   5  -2  -1   33.63    2.07
  -5   2   1   31.56    2.06
   5  -1  -1    3.78    0.39
   5  -1  -1    3.50    0.37
  -5   1   1    3.74    0.38
  -5   1   1    3.85    0.38
   5   0  -1   57.10    4.00
   5   0  -1   58.44    3.92
   5   0  -1   59.11    3.55
   5   0  -1   56.20    3.99
  -5   0   1   58.79    4.00
  -5   0   1   56.69    3.92
  -5   0   1   58.48    3.55
  -5   0   1   58.89    4.00
   5   1  -1    4.52    0.45
   5   1  -1    4.00    0.44
   5   1  -1    4.10    0.70
  -5  -1   1    4.71    0.44
  -5  -1   1    3.66    0.42
  -5  -1   1    3.89    0.64
   5   2  -1   31.51    2.05
   5   2  -1   31.91    2.05
   5   2  -1   28.53    2.50
   5   2  -1   32.62    2.43
  -5  -2   1   31.37    2.46
  -5  -2   1   32.39    2.05
  -5  -2   1   34.75    2.06
   5   3  -1    6.62    0.82
   5   3  -1    6.00    0.70
   5   3  -1    7.58    0.73
   5   3  -1    6.14    1.20
  -5  -3   1    5.83    0.75
  -5  -3   1    6.69    0.69
   5   4  -1    4.29    1.23
   5   4  -1    4.88    0.74
   5   4  -1    4.42    0.69
  -5  -4   1    4.00    0.68
  -5  -4   1    3.09    0.66
   5   5  -1    2.81    0.75
   5   5  -1    3.84    1.29
  -5  -5   1    2.90    0.73
   5   6  -1    7.93    0.97
   5   6  -1    7.43    1.48
  -5  -6   1    5.84    0.94
   5   7  -1    2.46    0.97
  -5  -7   1    2.21    0.93
   5   8  -1    4.31    1.16
  -5  -8   1    2.46    1.03
   4  -7  -1    0.46    0.89
  -4   7   1    1.46    1.03
   4  -6  -1    2.52    0.76
  -4   6   1    3.34    0.91
   4  -5  -1    2.16    0.67
  -4   5   1    1.86    0.73
   4  -4  -1    8.65    0.82
   4  -4  -1    6.17    0.91
  -4   4   1    7.83    0.87
   4  -3  -1    1.98    0.56
   4  -3  -1    1.90    0.51
  -4   3   1    2.53    0.50
  -4   3   1    1.67    0.51
   4  -2  -1   83.37    5.55
  -4   2   1   98.73    5.55
   4  -1  -1    4.83    0.40
   4   0  -1  275.63   19.02
   4   0  -1  277.76   18.70
   4   0  -1  283.05   16.89
   4   0  -1  269.61   19.02
  -4   0   1  299.36   19.02
  -4   0   1  268.77   18.70
  -4   0   1  281.86   16.89
   4   1  -1    1.67    0.56
   4   1  -1    4.26    0.37
   4   1  -1    3.75    0.38
  -4  -1   1    3.61    0.36
  -4  -1   1    3.81    0.35
  -4  -1   1    2.09    0.52
   4   2  -1   77.99    5.37
   4   2  -1   74.20    4.56
   4   2  -1   73.86    4.56
   4   2  -1   74.53    5.24
  -4  -2   1   75.26    4.56
  -4  -2   1   73.53    5.22
  -4  -2   1   71.40    4.56
   4   3  -1    3.75    1.08
   4   3  -1    2.34    0.56
   4   3  -1    2.01    0.62
   4   3  -1    2.47    0.55
  -4  -3   1    2.60    0.56
  -4  -3   1    2.57    0.55
   4   4  -1    8.54    0.99
   4   4  -1    9.83    1.37
   4   4  -1    9.77    0.89
  -4  -4   1    9.37    0.87
  -4  -4   1    8.86    0.97
   4   5  -1    3.60    1.23
  -4  -5   1    2.36    0.66
   4   6  -1    2.95    1.28
  -4  -6   1    3.33    0.79
  -4  -7   1    1.13    0.83
   4   8  -1    4.98    1.12
  -4  -8   1    3.44    1.00
  -3   7   1    5.56    1.23
   3  -6  -1    1.64    0.73
  -3   6   1    0.48    0.90
   3  -5  -1    1.93    0.55
   3  -5  -1   -0.49    0.59
  -3   5   1   -0.10    0.76
   3  -4  -1    0.56    0.54
   3  -4  -1    1.33    0.68
  -3   4   1    1.33    0.68
   3  -3  -1    6.93    0.90
   3  -3  -1    9.59    0.76
  -3   3   1    9.00    0.76
  -3   3   1    7.89    0.87
   3  -2  -1   29.49    1.72
   3  -2  -1   24.70    1.94
  -3   2   1   28.92    1.72
  -3   2   1   26.07    1.92
   3  -1  -1   51.01    3.02
  -3   1   1   48.10    3.02
   3   0  -1    1.84    0.22
   3   0  -1    2.37    0.22
   3   0  -1    3.19    0.29
   3   0  -1    3.00    0.27
  -3   0   1    2.63    0.24
   3   1  -1   48.87    3.00
   3   1  -1   47.41    3.00
   3   1  -1   46.06    3.42
  -3  -1   1   51.73    3.00
  -3  -1   1   48.37    3.42
  -3  -1   1   52.04    3.00
   3   2  -1   28.73    2.12
   3   2  -1   26.94    2.17
   3   2  -1   29.34    1.81
   3   2  -1   26.17    1.80
  -3  -2   1   32.24    2.12
  -3  -2   1   28.67    1.81
  -3  -2   1   26.95    2.15
   3   3  -1   10.23    0.86
   3   3  -1   10.91    1.03
   3   3  -1   12.49    1.35
  -3  -3   1   10.54    0.85
  -3  -3   1    8.85    1.21
  -3  -3   1   10.45    0.98
   3   4  -1    1.86    1.03
   3   4  -1    1.43    0.60
  -3  -4   1    1.79    0.57
  -3  -4   1    1.04    0.56
   3   5  -1    1.33    1.09
   3   5  -1    1.54    0.70
  -3  -5   1    0.52    0.61
  -3  -5   1    0.65    0.62
   3   6  -1    3.21    1.23
  -3  -6   1    1.66    0.74
  -3  -7   1    3.56    0.91
  -3  -8   1    3.20    0.98
   2  -7  -1    3.82    0.87
   2  -6  -1    2.65    0.80
  -2   6   1    0.74    1.03
   2  -5  -1    2.67    0.64
   2  -5  -1    2.71    0.60
  -2   5   1    4.59    0.93
   2  -4  -1    5.01    0.63
   2  -4  -1    2.42    0.60
   2  -4  -1    3.63    0.82
  -2   4   1    6.29    0.88
   2  -3  -1    4.71    0.57
   2  -3  -1    1.64    0.68
  -2   3   1    4.25    0.55
  -2   3   1    3.24    0.71
   2  -2  -1    5.10    0.48
   2  -2  -1    3.29    0.53
  -2   2   1    5.60    0.46
  -2   2   1    4.90    0.53
  -2   1   1    4.39    0.30
   2   0  -1   -0.09    0.04
   2   0  -1    0.05    0.06
   2   0  -1   -0.20    0.09
  -2   0   1   -0.04    0.03
  -2   0   1   -0.04    0.05
  -2   0   1   -0.13    0.04
   2   1  -1    6.40    0.43
   2   1  -1    7.58    0.51
   2   1  -1    6.43    0.43
   2   1  -1    5.90    0.55
  -2  -1   1    5.68    0.42
  -2  -1   1    5.92    0.49
  -2  -1   1    5.25    0.54
   2   2  -1    4.60    0.47
   2   2  -1    6.32    0.55
   2   2  -1    4.28    0.74
  -2  -2   1    4.69    0.48
  -2  -2   1    5.40    0.54
  -2  -2   1    4.62    0.68
   2   3  -1    5.80    0.97
   2   3  -1    4.69    0.59
   2   3  -1    5.07    0.62
  -2  -3   1    3.84    0.60
  -2  -3   1    4.69    0.59
  -2  -3   1    4.61    0.85
   2   4  -1    4.88    1.04
   2   4  -1    4.91    0.74
  -2  -4   1    4.73    0.66
  -2  -4   1    4.15    0.65
   2   5  -1    4.40    0.77
   2   5  -1    3.22    1.06
  -2  -5   1    3.28    0.67
  -2  -5   1    3.17    0.65
   2   6  -1    2.07    1.17
  -2  -6   1    1.92    0.71
  -2  -7   1    3.68    0.94
  -2  -8   1    2.05    1.04
   1  -7  -1    1.91    0.81
   1  -6  -1    2.29    0.71
  -1   6   1    5.06    1.14
   1  -5  -1    1.06    0.61
   1  -5  -1    0.89    0.56
  -1   5   1    0.99    0.90
   1  -4  -1    1.89    0.57
   1  -4  -1    2.08    0.60
  -1   4   1    2.90    0.82
   1  -3  -1    4.13    0.54
   1  -3  -1    4.40    0.56
   1  -3  -1    4.13    0.76
  -1   3   1    4.01    0.57
  -1   3   1    4.48    0.75
   1  -2  -1   22.40    1.91
   1  -2  -1   27.72    1.66
  -1   2   1   29.31    1.67
  -1   2   1   25.58    1.90
   1  -1  -1   34.33    2.37
   1  -1  -1   34.58    2.10
   1   1  -1   26.38    1.94
   1   1  -1   32.16    1.71
  -1  -1   1   24.95    1.94
   1   2  -1   28.59    1.81
   1   2  -1   28.37    2.11
   1   2  -1   28.77    2.12
  -1  -2   1   30.40    2.13
  -1  -2   1   28.60    1.81
  -1  -2   1   28.80    2.10
   1   3  -1    3.94    0.61
   1   3  -1    5.14    0.85
   1   3  -1    4.28    0.57
  -1  -3   1    4.76    0.55
  -1  -3   1    4.56    0.61
  -1  -3   1    4.85    0.79
   1   4  -1    4.69    0.97
   1   4  -1    4.05    0.69
  -1  -4   1    3.12    0.65
  -1  -4   1    2.95    0.58
   1   5  -1    1.97    0.99
  -1  -5   1    1.06    0.62
  -1  -5   1    1.13    0.57
   1   6  -1    3.44    1.29
  -1  -6   1    2.35    0.71
  -1  -7   1    3.09    0.86
  -1  -8   1    2.48    0.99
   0  -8  -1    5.08    1.14
   0  -7  -1    0.80    0.80
   0  -6  -1    1.82    0.73
   0   6   1    4.17    1.17
   0  -5  -1    2.21    0.64
   0  -5  -1    1.94    0.62
   0   5   1    3.76    0.97
   0  -4  -1   19.49    1.60
   0  -3  -1    4.70    0.60
   0  -3  -1    4.38    0.64
   0  -3  -1    6.01    0.87
   0   3   1    9.70    0.98
   0   3   1    7.14    0.76
   0   3   1    6.60    0.62
   0  -1  -1    0.03    0.22
   0  -1   1    0.38    0.10
   0   2  -1   34.77    2.64
   0  -2   1   39.41    2.71
   0   3  -1    4.07    0.82
   0   3  -1    4.73    0.58
   0  -3   1    4.47    0.56
   0  -3   1    5.17    0.56
   0  -3   1    4.16    0.79
   0   4  -1   14.17    1.54
   0  -4   1   16.66    1.20
   0  -4   1   15.37    1.34
   0   5  -1    2.43    0.99
   0  -5   1    1.64    0.60
   0  -5   1    0.87    0.61
   0   6  -1    3.20    1.18
   0  -6   1    2.34    0.71
   0  -7   1    1.31    0.77
   0  -8   1    2.18    0.95
  -1  -7  -1    2.86    0.93
  -1  -6  -1    3.34    0.81
   1   6   1    2.84    1.17
  -1  -5  -1    1.62    0.62
  -1  -5  -1    0.85    0.57
   1   5   1    0.61    1.00
   1   5   1    0.93    0.68
  -1  -4  -1    2.72    0.62
  -1  -4  -1    2.42    0.57
   1   4   1    3.21    1.05
   1   4   1    2.54    0.65
  -1  -3  -1    3.80    0.57
  -1  -3  -1    4.04    0.83
  -1  -3  -1    4.24    0.57
   1   3   1    6.47    0.99
   1   3   1    4.24    0.63
   1   3   1    4.00    0.55
  -1  -2  -1   30.75    2.19
  -1  -2  -1   29.60    1.87
  -1  -2  -1   27.17    2.19
   1   2   1   30.95    1.87
   1   2   1   30.13    2.19
   1   2   1   29.88    2.19
  -1  -1  -1   28.94    1.78
  -1  -1  -1   29.14    2.09
  -1   0  -1   -0.01    0.02
   1   0   1    0.01    0.02
   1   0   1    0.01    0.03
  -1   1  -1   26.04    1.54
   1  -1   1   24.35    1.55
  -1   2  -1   27.48    1.92
  -1   2  -1   28.05    1.69
   1  -2   1   24.93    1.92
   1  -2   1   26.57    1.69
  -1   3  -1    3.36    0.56
  -1   3  -1    2.51    0.71
   1  -3   1    4.49    0.70
   1  -3   1    4.17    0.56
  -1   4  -1    0.70    0.82
   1  -4   1   -0.30    0.56
   1  -4   1    0.61    0.49
  -1   5  -1    1.01    0.86
   1  -5   1    2.00    0.60
   1  -5   1    0.51    0.51
  -1   6  -1    4.53    1.09
   1  -6   1    2.86    0.76
   1  -7   1    2.09    0.80
   1  -8   1    2.29    0.94
  -2  -8  -1    1.73    1.00
  -2  -7  -1    3.27    0.90
  -2  -6  -1    2.01    0.81
   2   6   1    2.82    1.23
  -2  -5  -1    3.26    0.70
  -2  -5  -1    3.89    0.71
   2   5   1    3.62    1.19
   2   5   1    4.87    0.79
  -2  -4  -1    4.06    0.69
  -2  -4  -1    4.36    0.65
   2   4   1    5.87    1.16
   2   4   1    5.92    0.74
  -2  -3  -1    3.93    0.56
  -2  -3  -1    3.68    0.58
  -2  -3  -1    3.41    0.86
   2   3   1    3.23    0.97
   2   3   1    3.64    0.54
   2   3   1    4.16    0.64
  -2  -2  -1    4.12    0.70
  -2  -2  -1    5.09    0.56
  -2  -2  -1    4.73    0.48
   2   2   1    5.45    0.55
   2   2   1    5.68    0.49
   2   2   1    5.46    0.75
   2   2   1    5.55    0.48
  -2  -1  -1    5.40    0.53
  -2  -1  -1    5.70    0.41
  -2  -1  -1    5.50    0.41
   2   1   1    6.34    0.42
   2   1   1    6.17    0.54
   2   1   1    5.93    0.42
   2   1   1    5.54    0.52
  -2   0  -1   -0.06    0.06
  -2   0  -1   -0.01    0.05
  -2   0  -1   -0.07    0.04
   2   0   1    0.00    0.06
   2   0   1   -0.04    0.03
   2   0   1    0.03    0.07
  -2   1  -1    6.41    0.43
  -2   1  -1    6.24    0.46
   2  -1   1    6.61    0.44
   2  -1   1    6.34    0.46
   2  -1   1    6.67    0.48
  -2   2  -1    4.74    0.54
  -2   2  -1    5.05    0.48
   2  -2   1    4.35    0.55
   2  -2   1    5.83    0.49
  -2   3  -1    4.43    0.56
  -2   3  -1    5.57    0.71
   2  -3   1    4.47    0.71
   2  -3   1    4.64    0.61
  -2   4  -1    3.12    0.78
   2  -4   1    2.91    0.62
  -2   5  -1    2.40    0.88
   2  -5   1    2.42    0.62
   2  -5   1    2.92    0.60
  -2   6  -1    2.60    0.97
   2  -6   1    1.37    0.67
  -2   7  -1    3.71    1.17
   2  -7   1    3.05    0.90
  -3  -8  -1    3.29    1.02
  -3  -7  -1    4.94    0.99
   3   7   1    5.35    1.50
  -3  -6  -1    0.79    0.71
   3   6   1    0.81    1.31
  -3  -5  -1    0.54    0.62
  -3  -5  -1    0.22    0.60
   3   5   1    1.02    1.19
   3   5   1    1.17    0.67
  -3  -4  -1    1.25    0.55
  -3  -4  -1    0.77    0.55
   3   4   1    1.17    0.62
   3   4   1    1.79    1.06
   3   4   1    0.68    0.58
  -3  -3  -1    8.69    1.17
  -3  -3  -1    8.55    0.96
  -3  -3  -1   10.64    0.86
   3   3   1   11.22    0.87
   3   3   1   10.93    1.29
   3   3   1    9.73    0.85
   3   3   1   10.30    1.01
  -3  -2  -1   29.52    2.19
  -3  -2  -1   28.91    1.83
  -3  -2  -1   29.88    2.13
  -3  -2  -1   28.37    1.83
   3   2   1   28.06    2.14
   3   2   1   28.50    1.82
   3   2   1   29.12    2.19
   3   2   1   28.36    1.82
  -3  -1  -1   46.09    2.90
  -3  -1  -1   45.23    3.30
  -3  -1  -1   49.47    3.31
  -3  -1  -1   47.49    2.90
   3   1   1   45.14    3.30
   3   1   1   49.72    2.90
   3   1   1   49.26    2.90
   3   1   1   46.11    3.30
  -3   0  -1    1.99    0.22
  -3   0  -1    2.62    0.22
   3   0   1    1.97    0.23
   3   0   1    2.39    0.22
  -3   1  -1   47.30    3.05
  -3   1  -1   42.60    3.00
  -3   1  -1   44.03    2.72
   3  -1   1   44.90    2.72
   3  -1   1   46.64    3.05
   3  -1   1   41.73    2.99
  -3   2  -1   30.47    1.84
  -3   2  -1   27.31    2.05
   3  -2   1   31.04    1.85
   3  -2   1   28.09    2.06
  -3   3  -1    9.25    0.94
  -3   3  -1   10.42    0.81
   3  -3   1    8.19    0.96
   3  -3   1   10.10    0.82
  -3   4  -1   -0.55    0.63
   3  -4   1    0.55    0.55
   3  -4   1    0.51    0.65
  -3   5  -1    1.49    0.77
   3  -5   1    0.55    0.64
  -3   6  -1    0.56    0.89
   3  -6   1    1.35    0.70
  -3   7  -1    3.04    1.11
   3  -7   1    2.17    0.86
  -4  -8  -1    4.53    1.10
  -4  -7  -1    2.62    0.91
   4   7   1    1.65    0.95
  -4  -6  -1    2.56    0.80
   4   6   1    4.03    1.44
   4   6   1    4.45    0.86
  -4  -5  -1    2.89    0.70
   4   5   1    3.01    0.73
   4   5   1    2.32    1.34
   4   5   1    1.76    0.77
  -4  -4  -1    8.70    0.91
  -4  -4  -1    9.62    1.03
   4   4   1   14.57    1.48
   4   4   1    8.99    1.06
   4   4   1   10.21    0.93
  -4  -3  -1    1.66    0.54
  -4  -3  -1    1.90    0.52
   4   3   1    1.53    1.02
   4   3   1    2.98    0.54
   4   3   1    2.44    0.55
   4   3   1    2.73    0.61
  -4  -2  -1   69.55    4.80
  -4  -2  -1   71.35    5.50
  -4  -2  -1   72.12    4.81
   4   2   1   87.79    4.81
   4   2   1   83.60    5.67
   4   2   1   77.09    5.49
   4   2   1   79.99    5.50
   4   2   1   85.87    4.82
  -4  -1  -1    3.03    0.52
  -4  -1  -1    4.24    0.40
  -4  -1  -1    3.17    0.53
  -4  -1  -1    3.35    0.38
   4   1   1    4.91    0.41
   4   1   1    3.08    0.54
   4   1   1    2.84    0.51
   4   1   1    4.91    0.40
  -4   0  -1  230.63   16.24
  -4   0  -1  234.67   14.69
  -4   0  -1  254.76   16.53
   4   0   1  239.08   14.68
   4   0   1  240.91   16.25
   4   0   1  256.36   16.53
   4  -1   1    4.44    0.39
   4  -1   1    4.51    0.38
   4  -1   1    4.45    0.39
  -4   2  -1   81.59    4.79
  -4   2  -1   77.83    5.37
  -4   2  -1   75.22    5.26
   4  -2   1   79.53    5.37
   4  -2   1   77.33    4.79
  -4   3  -1    2.12    0.50
  -4   3  -1    1.04    0.49
   4  -3   1    2.27    0.53
   4  -3   1    2.29    0.59
  -4   4  -1    7.05    0.84
   4  -4   1    8.39    0.83
   4  -4   1    6.71    0.88
  -4   5  -1    2.41    0.76
   4  -5   1    2.19    0.65
  -4   6  -1    2.08    0.92
   4  -6   1    3.94    0.81
   4  -7   1    0.43    0.84
   5   7   1    2.58    1.64
   5   7   1    4.53    1.04
  -5  -6  -1    7.33    1.03
   5   6   1    7.52    0.98
   5   6   1    8.97    1.72
  -5  -5  -1    3.28    0.73
   5   5   1    3.17    0.75
   5   5   1    1.81    1.31
  -5  -4  -1    2.06    0.60
  -5  -4  -1    4.31    0.66
   5   4   1    4.38    0.77
   5   4   1    3.44    1.15
   5   4   1    3.73    0.65
  -5  -3  -1    6.31    0.68
  -5  -3  -1    5.34    0.66
   5   3   1    6.24    0.78
   5   3   1    5.95    1.19
   5   3   1    5.39    0.68
   5   3   1    4.89    0.68
  -5  -2  -1   32.36    2.04
  -5  -2  -1   32.05    2.45
  -5  -2  -1   31.73    2.03
   5   2   1   33.05    2.05
   5   2   1   32.30    2.45
   5   2   1   33.66    2.04
   5   2   1   25.40    2.40
  -5  -1  -1    3.49    0.42
  -5  -1  -1    3.31    0.61
  -5  -1  -1    3.25    0.58
  -5  -1  -1    3.72    0.44
   5   1   1    3.91    0.43
   5   1   1    3.10    0.54
   5   1   1    3.91    0.63
   5   1   1    3.36    0.44
  -5   0  -1   53.93    3.63
  -5   0  -1   50.25    3.56
  -5   0  -1   53.22    3.24
   5   0   1   51.42    3.23
   5   0   1   52.84    3.56
   5   0   1   54.02    3.63
  -5   1  -1    3.24    0.39
  -5   1  -1    3.90    0.41
  -5   1  -1    4.00    0.40
   5  -1   1    3.68    0.41
   5  -1   1    3.74    0.37
   5  -1   1    3.24    0.35
  -5   2  -1   29.58    2.02
  -5   2  -1   28.03    1.87
  -5   2  -1   28.79    2.05
   5  -2   1   28.82    2.07
   5  -2   1   31.06    1.88
  -5   3  -1    5.02    0.64
  -5   3  -1    5.98    0.63
   5  -3   1    5.46    0.70
   5  -3   1    6.11    0.68
  -5   4  -1    2.66    0.58
   5  -4   1    2.52    0.68
   5  -4   1    3.23    0.61
  -5   5  -1    3.58    0.73
   5  -5   1    3.96    0.75
  -5   6  -1    6.09    1.00
   5  -6   1    7.66    0.92
   5  -8   1    1.85    0.96
  -6  -8  -1    1.40    1.01
   6   8   1    2.89    1.11
  -6  -7  -1    2.63    0.92
   6   7   1    1.56    1.77
   6   7   1    2.44    0.96
  -6  -6  -1    3.92    0.81
   6   6   1    4.62    0.93
   6   6   1    4.46    1.65
  -6  -5  -1    3.27    0.71
   6   5   1    4.50    0.79
   6   5   1    6.97    1.44
  -6  -4  -1   12.72    1.04
   6   4   1   12.40    1.24
   6   4   1   13.33    1.53
   6   4   1   11.54    1.04
  -6  -3  -1   10.88    0.98
   6   3   1   14.07    1.55
   6   3   1   12.08    1.19
   6   3   1   11.92    0.99
  -6  -2  -1   37.03    2.42
  -6  -2  -1   33.76    2.90
  -6  -2  -1   35.22    2.43
   6   2   1   34.70    2.85
   6   2   1   43.78    2.45
   6   2   1   40.88    2.44
   6   2   1   40.20    2.90
  -6  -1  -1   28.22    2.15
  -6  -1  -1   30.08    2.13
  -6  -1  -1   28.60    1.82
   6   1   1   28.91    1.83
   6   1   1   29.89    1.84
   6   1   1   25.78    2.11
   6   1   1   26.45    2.14
  -6   0  -1  126.28    8.78
  -6   0  -1  132.73    7.96
  -6   0  -1  131.92    8.95
   6   0   1  131.84    8.79
   6   0   1  135.42    8.95
   6   0   1  126.92    7.96
   6   0   1  130.71    8.94
  -6   1  -1   25.96    1.84
  -6   1  -1   25.65    1.87
  -6   1  -1   26.48    1.70
   6  -1   1   26.08    1.83
   6  -1   1   26.40    1.70
   6  -1   1   27.93    1.87
  -6   2  -1   38.13    2.59
  -6   2  -1   37.92    2.39
  -6   2  -1   39.23    2.64
   6  -2   1   39.12    2.40
   6  -2   1   35.01    2.64
  -6   3  -1   11.85    0.93
  -6   3  -1   11.75    0.99
  -6   3  -1   11.47    0.94
   6  -3   1   12.83    1.04
   6  -3   1   11.89    0.96
  -6   4  -1   12.53    1.08
   6  -4   1   12.39    1.01
   6  -4   1   12.40    1.14
  -6   5  -1    3.81    0.76
   6  -5   1    4.78    0.76
  -6   6  -1    2.20    0.78
   6  -6   1    2.27    0.82
  -7  -8  -1    2.37    0.97
   7   8   1    1.73    1.11
  -7  -7  -1    4.13    0.91
   7   7   1    4.64    1.02
  -7  -6  -1    2.12    0.78
   7   6   1    3.05    0.91
   7   6   1    4.35    1.71
  -7  -5  -1    5.87    0.84
   7   5   1    7.66    0.91
   7   5   1    8.15    1.54
  -7  -4  -1    4.63    0.73
   7   4   1    7.60    1.31
   7   4   1    6.20    0.78
  -7  -3  -1    8.50    0.82
   7   3   1    8.39    0.84
   7   3   1    7.67    0.96
   7   3   1    7.00    1.31
  -7  -2  -1    6.55    0.72
  -7  -2  -1    6.62    0.74
   7   2   1    8.15    0.77
   7   2   1    7.45    1.14
   7   2   1    8.10    0.79
  -7  -1  -1   41.64    3.05
  -7  -1  -1   42.60    2.66
  -7  -1  -1   38.77    3.07
   7   1   1   41.36    3.09
   7   1   1   43.20    2.67
   7   1   1   41.46    3.04
   7   1   1   45.00    2.67
  -7   0  -1    0.67    0.35
  -7   0  -1   -0.16    0.48
  -7   0  -1    0.70    0.40
   7   0   1   -0.08    0.37
   7   0   1    0.26    0.40
   7   0   1    0.01    0.47
   7   0   1    0.86    0.35
  -7   1  -1   38.87    2.46
  -7   1  -1   39.77    2.69
  -7   1  -1   37.09    2.73
   7  -1   1   38.84    2.46
   7  -1   1   38.91    2.67
   7  -1   1   40.16    2.72
  -7   2  -1    6.82    0.66
  -7   2  -1    6.71    0.63
  -7   2  -1    6.94    0.68
   7  -2   1    7.76    0.70
   7  -2   1    5.69    0.63
   7  -2   1    6.11    0.61
  -7   3  -1    8.15    0.69
  -7   3  -1    7.47    0.70
   7  -3   1    6.42    0.76
   7  -3   1    6.06    0.72
  -7   4  -1    5.30    0.72
  -7   4  -1    7.36    0.68
   7  -4   1    4.95    0.77
   7  -4   1    6.16    0.78
  -7   5  -1    6.08    0.84
   7  -5   1    7.45    0.88
   7  -6   1    2.99    0.84
   7  -7   1    4.82    1.02
  -8  -8  -1    3.38    1.10
   8   7   1    4.36    1.09
  -8  -6  -1    4.41    0.92
   8   6   1    8.46    1.87
   8   6   1    6.16    1.02
  -8  -5  -1    3.98    0.81
   8   5   1    3.44    1.44
   8   5   1    3.43    0.83
  -8  -4  -1   17.00    1.37
   8   4   1   19.18    1.93
   8   4   1   17.33    1.35
  -8  -3  -1    2.71    0.61
   8   3   1    5.72    1.16
   8   3   1    3.92    0.67
  -8  -2  -1   18.06    1.30
  -8  -2  -1   16.71    1.27
   8   2   1   17.79    1.71
   8   2   1   17.28    1.28
   8   2   1   17.57    1.31
  -8  -1  -1    5.24    0.82
  -8  -1  -1    6.01    0.63
  -8  -1  -1    6.20    0.92
   8   1   1    5.38    0.60
   8   1   1    6.76    0.70
   8   1   1    5.37    0.98
   8   1   1    5.70    0.66
   8   1   1    5.80    0.83
  -8   0  -1   50.96    3.26
  -8   0  -1   52.51    3.68
  -8   0  -1   50.60    3.57
   8   0   1   54.01    3.68
   8   0   1   50.48    3.57
   8   0   1   52.84    3.26
   8   0   1   53.57    3.64
  -8   1  -1    5.69    0.69
  -8   1  -1    7.38    0.68
  -8   1  -1    7.41    0.72
   8  -1   1    6.32    0.67
   8  -1   1    5.60    0.64
   8  -1   1    5.84    0.67
  -8   2  -1   17.86    1.32
  -8   2  -1   17.57    1.23
  -8   2  -1   18.35    1.31
   8  -2   1   18.00    1.24
   8  -2   1   15.90    1.30
   8  -2   1   17.71    1.28
  -8   3  -1    2.82    0.47
  -8   3  -1    3.20    0.48
   8  -3   1    3.89    0.62
   8  -3   1    1.83    0.48
  -8   4  -1   16.83    1.32
  -8   4  -1   18.74    1.39
   8  -4   1   18.65    1.32
   8  -4   1   16.45    1.42
  -8   5  -1    3.91    0.76
   8  -5   1    4.90    0.79
   8  -6   1    6.55    0.98
  -9  -7  -1    4.04    0.95
   9   7   1    5.48    1.12
  -9  -6  -1    5.01    0.95
   9   6   1    6.76    1.05
   9   6   1    6.47    1.89
  -9  -5  -1    4.10    0.78
   9   5   1    4.27    0.88
   9   5   1    2.63    1.46
  -9  -4  -1    3.61    0.72
   9   4   1    2.79    1.35
   9   4   1    4.86    0.81
  -9  -3  -1    8.64    0.90
   9   3   1   10.05    0.96
   9   3   1   10.58    1.40
  -9  -2  -1   15.80    1.21
   9   2   1   16.63    1.68
   9   2   1   15.65    1.26
  -9  -1  -1   11.18    1.13
  -9  -1  -1    8.56    0.83
  -9  -1  -1    9.82    1.02
   9   1   1    9.05    0.88
   9   1   1    7.35    0.83
   9   1   1    9.87    0.90
   9   1   1    9.22    1.16
   9   1   1    7.53    1.01
  -9   0  -1    4.44    0.58
  -9   0  -1    3.86    0.53
  -9   0  -1    1.96    0.70
   9   0   1    3.79    0.59
   9   0   1    2.81    0.60
   9   0   1    4.27    0.71
   9   0   1    3.92    0.51
  -9   1  -1    7.59    0.75
  -9   1  -1    7.58    0.81
  -9   1  -1    7.20    0.73
   9  -1   1    7.70    0.77
   9  -1   1    8.62    0.77
   9  -1   1    7.43    0.75
  -9   2  -1   14.35    1.18
  -9   2  -1   16.06    1.18
   9  -2   1   15.13    1.14
   9  -2   1   15.25    1.16
   9  -2   1   14.25    1.14
  -9   3  -1    8.21    0.81
  -9   3  -1    9.10    0.80
   9  -3   1    8.56    0.80
   9  -3   1    9.48    0.88
  -9   4  -1    5.07    0.61
  -9   4  -1    4.83    0.67
   9  -4   1    3.61    0.68
   9  -4   1    3.91    0.76
  -9   5  -1    3.83    0.63
  -9   5  -1    3.59    0.72
   9  -5   1    3.16    0.79
  -9   6  -1    5.70    0.80
   9  -6   1    4.91    0.99
 -10  -7  -1    1.91    1.02
 -10  -6  -1    6.12    1.01
  10   6   1    6.50    1.15
 -10  -5  -1    1.07    0.74
  10   5   1    3.28    1.49
  10   5   1    2.60    0.87
 -10  -4  -1    5.13    0.83
  10   4   1    7.98    0.96
  10   4   1    8.92    1.49
 -10  -3  -1    4.01    0.72
  10   3   1    5.99    1.28
  10   3   1    6.71    0.79
  10   2   1   28.32    1.90
  10   2   1   26.77    2.28
 -10  -1  -1   12.10    1.36
  10   1   1   12.45    1.08
  10   1   1   11.47    1.36
  10   1   1   13.95    1.12
 -10   0  -1   99.22    6.70
 -10   0  -1   90.43    6.54
 -10   0  -1   92.46    5.95
  10   0   1   94.50    6.54
  10   0   1   97.08    5.95
  10   0   1  102.53    6.71
  10   0   1  100.51    6.68
 -10   1  -1   14.01    1.00
 -10   1  -1    7.83    1.01
  10  -1   1   11.96    0.94
  10  -1   1   11.17    0.93
  10  -1   1    8.56    0.94
 -10   2  -1   24.62    1.79
 -10   2  -1   24.96    1.81
  10  -2   1   24.52    1.79
  10  -2   1   24.84    1.68
  10  -2   1   24.29    1.75
 -10   3  -1    6.24    0.74
 -10   3  -1    8.96    0.76
  10  -3   1    4.73    0.78
 -10   4  -1    6.41    0.78
 -10   4  -1    7.32    0.77
  10  -4   1    6.52    0.88
  10  -4   1    7.71    0.85
 -10   5  -1    1.53    0.61
 -10   5  -1    2.69    0.67
  10  -5   1    1.90    0.81
 -10   6  -1    6.62    0.87
 -11  -8  -1    1.16    1.10
 -11  -6  -1    2.54    0.89
  11   6   1    5.04    1.03
 -11  -5  -1    4.41    0.85
  11   5   1    5.38    0.97
  11   5   1    1.68    1.59
 -11  -4  -1    3.96    0.78
  11   4   1    2.32    1.46
  11   4   1    4.49    0.83
 -11  -3  -1    3.40    0.69
  11   3   1    3.36    1.26
  11   3   1    4.50    0.75
  11   2   1   20.18    1.80
  11   2   1   16.98    1.38
 -11  -1  -1    9.79    1.19
  11   1   1    9.65    0.96
  11   1   1   10.69    1.22
  11   1   1    9.54    1.02
 -11   0  -1    6.06    0.62
 -11   0  -1    2.94    0.81
  11   0   1    3.95    0.68
  11   0   1    4.33    0.66
  11   0   1    4.26    0.57
  11   0   1    4.24    0.83
 -11   1  -1    8.06    0.84
 -11   1  -1    7.48    0.88
  11  -1   1    7.27    0.79
  11  -1   1    8.14    0.79
  11  -1   1    7.62    0.78
 -11   2  -1   15.92    1.29
 -11   2  -1   15.77    1.27
  11  -2   1   16.07    1.25
  11  -2   1   16.72    1.23
  11  -2   1   15.48    1.22
 -11   3  -1    5.07    0.64
 -11   3  -1    4.31    0.68
  11  -3   1    4.59    0.60
  11  -3   1    4.52    0.78
 -11   4  -1    4.00    0.62
  11  -4   1    3.36    0.63
  11  -4   1    3.21    0.82
 -11   5  -1    6.64    0.88
 -11   5  -1    7.32    0.81
  11  -5   1    5.54    0.98
 -11   6  -1    4.32    0.81
  11  -7   1    5.99    1.17
 -12  -6  -1    3.31    0.91
  12   6   1    2.71    1.05
 -12  -5  -1    3.70    0.85
  12   5   1    1.82    1.64
  12   5   1    1.35    0.93
 -12  -4  -1   12.55    1.16
  12   4   1   11.82    1.83
  12   4   1   12.63    1.20
 -12  -3  -1    8.02    0.90
  12   3   1    8.57    1.54
  12   3   1    7.82    0.97
  12   2   1   10.61    1.08
  12   2   1   12.69    1.45
  12   2   1   10.89    1.01
 -12  -1  -1    5.14    0.97
  12   1   1    4.39    0.71
  12   1   1    3.52    0.97
  12   1   1    4.50    0.71
 -12   0  -1    6.18    0.70
 -12   0  -1    6.32    0.95
  12   0   1    6.61    0.93
  12   0   1    6.75    0.77
  12   0   1    5.14    0.67
 -12   1  -1    4.76    0.75
 -12   1  -1    4.84    0.63
  12  -1   1    3.43    0.55
  12  -1   1    4.38    0.68
  12  -1   1    4.46    0.69
  12  -1   1    3.58    0.61
 -12   2  -1    9.41    0.97
 -12   2  -1    9.56    0.96
  12  -2   1   11.23    1.00
  12  -2   1    9.32    0.90
 -12   3  -1    7.00    0.88
 -12   3  -1    8.21    0.90
  12  -3   1    9.98    0.98
  12  -3   1    8.64    0.82
 -12   4  -1   12.43    1.13
 -12   4  -1   13.45    1.14
  12  -4   1   12.90    1.14
  12  -4   1   13.49    1.22
 -12   5  -1    3.68    0.73
 -12   5  -1    4.79    0.79
  12  -5   1    3.94    0.94
 -12   6  -1    4.09    0.82
  12  -6   1    4.11    1.04
 -13  -7  -1    2.29    1.01
  13   7   1    2.14    1.19
 -13  -6  -1    2.14    0.95
  13   6   1    1.96    1.04
 -13  -5  -1    3.20    0.93
  13   5   1    5.61    1.03
 -13  -4  -1    6.24    0.90
  13   4   1    6.08    0.99
  13   3   1    6.04    1.52
  13   3   1    5.75    0.90
  13   2   1    2.12    0.70
  13   2   1    1.47    0.56
  13   2   1    1.38    1.19
 -13  -1  -1   15.12    1.58
  13   1   1   14.98    1.27
  13   1   1   13.21    1.55
  13   1   1   15.77    1.34
 -13   0  -1    6.53    0.75
 -13   0  -1    6.77    1.04
  13   0   1    5.27    0.70
  13   0   1    7.07    0.84
  13   0   1    7.04    1.03
 -13   1  -1   12.55    1.25
 -13   1  -1   13.72    1.18
  13  -1   1   12.66    1.22
  13  -1   1   12.94    1.12
 -13   2  -1    0.95    0.68
 -13   2  -1    2.92    0.62
  13  -2   1    2.43    0.55
  13  -2   1    2.76    0.75
 -13   3  -1    5.86    0.82
 -13   3  -1    7.17    0.80
  13  -3   1    6.45    0.92
 -13   4  -1    7.79    0.91
  13  -4   1    7.99    1.05
 -13   5  -1    3.58    0.84
 -13   5  -1    4.74    0.79
 -13   6  -1    2.69    0.80
 -14  -7  -1    1.65    1.01
 -14  -6  -1    4.74    1.07
  14   6   1    5.82    1.19
 -14  -5  -1    2.85    0.88
  14   5   1    3.73    1.00
 -14  -4  -1    3.70    0.84
  14   4   1    5.11    1.00
  14   3   1    9.00    1.70
  14   3   1    9.26    1.10
  14   2   1    4.55    1.34
  14   2   1    8.00    0.96
  14   2   1    7.46    0.88
 -14  -1  -1    8.71    1.33
  14   1   1    9.59    1.01
  14   1   1    8.84    1.00
  14   1   1   10.58    1.36
 -14   0  -1   14.64    1.48
 -14   0  -1   14.35    1.26
  14   0   1   14.56    1.28
  14   0   1   13.43    1.50
  14   0   1   15.46    1.26
 -14   1  -1    6.74    0.88
 -14   1  -1    7.85    1.06
  14  -1   1    8.91    0.94
  14  -1   1    8.42    1.01
 -14   2  -1   10.97    1.00
 -14   2  -1    7.87    0.99
  14  -2   1    6.64    0.87
  14  -2   1   10.46    1.01
 -14   3  -1    9.70    1.06
 -14   3  -1    9.20    1.02
  14  -3   1    9.50    0.92
  14  -3   1   11.87    1.13
 -14   4  -1    4.54    0.80
  14  -4   1    3.84    0.97
 -14   5  -1    1.84    0.76
  14  -5   1    4.57    1.04
 -14   6  -1    5.06    0.88
 -15  -7  -1   -0.39    1.01
  15   7   1    0.34    1.18
 -15  -5  -1    4.65    0.96
  15   5   1    4.18    1.11
 -15  -4  -1    8.39    1.07
  15   4   1    7.52    1.15
  15   3   1    2.60    0.93
  15   3   1    2.28    1.48
  15   2   1   -1.37    1.20
  15   2   1    1.62    0.81
  15   2   1    1.13    0.69
  15   1   1    5.66    1.24
  15   1   1    6.62    0.93
  15   1   1    7.74    0.93
 -15   0  -1   11.85    1.13
 -15   0  -1   12.83    1.44
  15   0   1   11.48    1.16
  15   0   1   11.86    1.44
 -15   1  -1    7.03    0.87
 -15   1  -1    7.45    1.06
  15  -1   1    6.35    1.03
  15  -1   1    7.39    0.93
 -15   2  -1   -0.06    0.78
 -15   2  -1    1.70    0.64
  15  -2   1    1.25    0.81
 -15   3  -1    2.69    0.73
  15  -3   1    3.46    0.92
 -15   4  -1    8.06    1.01
  15  -4   1   10.16    1.25
 -15   5  -1    5.25    0.91
 -15   6  -1    2.68    0.86
 -16  -6  -1    2.23    0.96
  16   6   1    4.27    1.17
 -16  -5  -1    3.13    0.94
  16   5   1    0.65    1.08
  16   4   1    3.90    1.09
  16   3   1    5.18    0.79
  16   3   1    5.55    1.05
  16   2   1    8.31    1.57
  16   2   1    8.25    1.14
  16   1   1   23.48    2.08
  16   1   1   19.11    1.66
 -16   0  -1   23.22    1.76
 -16   0  -1   22.20    2.06
  16   0   1   20.70    2.08
  16   0   1   22.90    1.73
 -16   1  -1   19.11    1.61
 -16   1  -1   19.51    1.74
  16  -1   1   17.66    1.76
  16  -1   1   18.67    1.50
 -16   2  -1    7.43    0.99
 -16   2  -1    9.54    1.14
  16  -2   1    9.86    1.11
  16  -2   1    7.75    1.08
 -16   3  -1    4.20    0.84
  16  -3   1    5.72    1.06
 -16   4  -1    3.95    0.87
  16  -4   1    3.20    1.08
 -16   5  -1    2.44    0.86
 -16   6  -1    0.50    0.85
 -17  -5  -1    1.87    0.94
  17   5   1    4.00    1.19
  17   4   1    2.99    1.10
  17   3   1    3.28    1.05
  17   2   1    1.91    1.52
  17   2   1    3.60    1.01
  17   1   1    4.43    0.98
  17   1   1    2.75    1.38
 -17   0  -1    3.55    0.69
 -17   0  -1    0.85    1.19
  17   0   1    1.27    1.19
  17   0   1    3.10    0.92
 -17   1  -1    4.04    0.80
 -17   1  -1    4.69    1.14
  17  -1   1    3.99    1.11
  17  -1   1    3.64    0.94
 -17   2  -1    3.12    0.82
  17  -2   1    3.43    0.95
  17  -2   1    4.59    0.99
 -17   3  -1    1.53    0.81
  17  -3   1    2.73    1.06
 -17   4  -1    1.92    0.83
  17  -4   1    3.92    1.13
 -17   5  -1    2.39    0.87
  18   5   1    1.58    1.16
  18   4   1    0.70    1.13
  18   3   1    3.44    1.13
  18   2   1    6.63    1.19
  18   1   1    7.19    1.14
  18   0   1    2.63    0.98
 -18   1  -1    4.12    0.85
  18  -1   1    6.38    1.05
 -18   2  -1    4.62    0.93
  18  -2   1    8.16    1.16
  18  -2   1    5.38    1.10
 -18   3  -1    2.81    0.86
  18  -3   1    3.57    1.13
 -18   4  -1    0.52    0.85
  18  -4   1    1.43    1.10
 -18   5  -1    2.47    0.92
  19   3   1    4.40    1.25
  19   2   1    1.05    1.10
  19   1   1    9.23    1.28
  19   0   1   12.98    1.44
 -19   1  -1    6.46    0.97
  19  -1   1    8.57    1.18
 -19   2  -1    1.02    0.85
  19  -2   1    1.05    1.06
 -19   3  -1    1.75    0.90
  19  -3   1    4.11    1.17
 -19   4  -1    3.76    1.01
 -19   5  -1    2.91    0.99
  20   4   1   -0.23    1.22
  20   3   1    2.18    1.25
  20   2   1    2.10    1.12
  20   1   1   12.96    1.50
  20   0   1    6.28    1.21
 -20   1  -1   10.08    1.20
  20  -1   1   13.39    1.40
 -20   2  -1    1.00    0.89
  20  -2   1    3.92    1.14
 -20   3  -1    0.79    0.89
 -20   4  -1    0.92    0.94
  21   3   1    0.32    1.24
  21   2   1    3.05    1.18
  21   1   1    3.81    1.18
  21   0   1    9.42    1.38
 -21   1  -1    2.47    0.86
  21  -1   1    2.52    1.13
 -21   2  -1    1.53    0.93
  21  -2   1    2.26    1.18
 -21   3  -1   -1.63    0.89
  22   2   1    5.07    1.27
  22   1   1    3.55    1.20
  22   0   1    3.98    1.21
  22  -1   1    2.53    1.17
 -22   2  -1    4.12    0.99
 -22   2   2    0.56    0.93
  22  -1  -2    4.50    1.17
 -22   1   2    2.37    0.92
  22   0  -2    1.81    1.12
  22   1  -2   -0.40    1.10
  22   2  -2    2.44    1.20
 -21   3   2    0.47    0.95
 -21   2   2    0.50    0.92
  21  -1  -2    1.72    1.07
 -21   1   2    1.88    0.85
  21   0  -2    5.16    1.17
  21   1  -2    2.40    1.12
  21   2  -2    2.21    1.15
  21   3  -2    2.04    1.26
 -20   4   2   -0.40    0.92
 -20   3   2    3.29    0.97
 -20   2   2    2.14    0.94
  20  -1  -2    8.19    1.21
 -20   1   2    6.40    1.03
  20   0  -2   10.72    1.35
  20   1  -2    7.58    1.25
  20   2  -2    1.98    1.14
  20   3  -2    2.53    1.20
  20   4  -2    0.52    1.14
 -19   4   2    1.66    0.93
 -19   3   2    1.54    0.89
  19  -2  -2    3.17    1.07
 -19   2   2    0.91    0.87
  19  -1  -2    5.92    1.05
 -19   1   2    4.51    0.92
  19   0  -2    2.30    0.96
  19   1  -2    7.58    1.18
  19   2  -2    2.24    1.13
  19   3  -2    2.95    1.15
 -18   5   2    2.17    0.92
 -18   4   2    0.93    0.85
  18  -3  -2    2.73    1.08
 -18   3   2    2.82    0.87
  18  -2  -2    5.57    1.09
 -18   2   2    4.54    0.91
  18  -1  -2    4.07    0.93
 -18   1   2    3.48    0.84
  18   0  -2    0.85    0.89
  18   1  -2    2.53    0.94
  18   2  -2    6.58    1.19
  18   3  -2    5.43    1.17
  18   4  -2    0.67    1.09
 -17   5   2    1.48    0.87
 -17   4   2    3.47    0.87
  17  -3  -2    2.31    1.01
 -17   3   2    2.77    0.82
  17  -2  -2   10.97    1.16
 -17   2   2    6.94    1.02
  17  -1  -2    6.22    0.91
 -17   1   2    2.41    0.82
  17   0  -2   16.76    1.40
  17   0  -2   15.06    1.78
 -17   0   2   14.45    1.38
  17   1  -2    5.01    0.97
  17   2  -2    8.68    1.18
  17   3  -2    3.51    1.05
  17   4  -2    2.33    1.09
 -17  -5   2    2.77    1.01
 -16   6   2    3.00    0.90
 -16   5   2    2.25    0.85
 -16   4   2    3.44    0.85
  16  -3  -2    6.95    1.10
 -16   3   2    5.82    0.91
  16  -2  -2    4.99    0.93
 -16   2   2    3.39    0.79
  16  -1  -2    8.15    1.01
  16  -1  -2    7.50    1.25
 -16   1   2   11.81    1.15
  16   0  -2   11.18    1.20
  16   0  -2   11.16    1.55
 -16   0   2   13.56    1.22
  16   1  -2    4.70    0.91
  16   1  -2    3.87    1.36
  16   2  -2    3.71    0.93
  16   3  -2    7.17    1.11
  16   4  -2    4.66    1.09
 -16  -4   2    2.50    0.91
  16   5  -2    0.87    1.03
 -16  -5   2    1.10    0.89
 -16  -6   2    3.21    1.12
 -15   6   2    2.38    0.85
 -15   5   2    4.10    0.85
  15  -4  -2    6.22    1.08
 -15   4   2    6.01    0.87
  15  -3  -2    6.90    0.99
 -15   3   2    3.95    0.79
  15  -2  -2    8.67    0.97
 -15   2   2    5.44    0.84
  15  -1  -2    6.87    0.87
  15  -1  -2    7.84    1.11
  15  -1  -2    9.93    0.95
 -15   1   2    7.74    0.93
  15   0  -2   16.72    1.29
  15   0  -2   14.53    1.60
 -15   0   2   14.28    1.32
  15   1  -2    9.77    1.43
  15   1  -2    8.63    1.03
  15   2  -2    7.57    1.03
  15   2  -2    8.20    1.55
  15   3  -2    3.01    1.61
  15   3  -2    6.07    1.00
  15   3  -2    6.59    0.82
  15   4  -2    4.06    1.01
 -15  -4   2    4.96    0.93
  15   5  -2    5.59    1.11
 -15  -5   2    4.25    0.97
  15   6  -2    1.18    1.07
 -15  -6   2    2.37    0.98
 -15  -7   2    2.98    1.09
 -14   6   2    3.50    0.83
 -14   5   2    1.92    0.74
 -14   4   2    4.03    0.76
  14  -3  -2   13.30    1.18
 -14   3   2   12.02    1.14
  14  -2  -2    9.16    1.01
 -14   2   2   10.01    1.02
  14  -1  -2    6.65    0.79
  14  -1  -2    6.65    0.85
  14  -1  -2    5.96    1.00
 -14   1   2    6.69    0.84
 -14   1   2    8.04    1.08
  14   0  -2    1.23    0.97
  14   0  -2    2.96    0.71
 -14   0   2    3.49    0.64
  14   1  -2    8.82    0.96
  14   1  -2    6.89    1.33
  14   1  -2    7.60    0.93
  14   2  -2    9.37    1.05
  14   2  -2   10.84    1.11
  14   2  -2    9.67    1.59
  14   3  -2   11.74    1.87
  14   3  -2   13.37    1.25
  14   4  -2    2.47    1.68
  14   4  -2    2.37    0.88
 -14  -4   2    1.76    0.79
  14   5  -2    0.84    0.97
 -14  -5   2    1.13    0.89
 -14  -6   2    3.46    1.00
  14   7  -2    1.23    1.14
 -14  -7   2    1.54    1.02
 -13   6   2    3.40    0.80
 -13   5   2    3.39    0.72
  13  -4  -2    7.83    1.03
 -13   4   2    6.52    0.81
  13  -3  -2    3.69    0.79
 -13   3   2    2.94    0.64
  13  -2  -2   13.83    1.17
 -13   2   2   14.38    1.24
  13  -1  -2    6.01    0.77
  13  -1  -2    4.59    0.69
  13  -1  -2    6.35    0.91
 -13   1   2    6.13    0.75
 -13   1   2    6.48    0.94
  13   0  -2    7.92    0.85
  13   0  -2    6.36    0.75
  13   0  -2    8.63    1.09
 -13   0   2    7.23    0.81
  13   1  -2    3.61    1.16
  13   1  -2    6.14    0.80
  13   1  -2    5.63    0.79
  13   2  -2   16.56    1.82
  13   2  -2   17.23    1.40
  13   2  -2   15.85    1.33
  13   3  -2    3.69    0.81
  13   3  -2    1.20    1.30
 -13  -3   2    2.83    0.73
  13   4  -2    8.28    1.06
  13   4  -2    8.11    1.70
 -13  -4   2    6.27    0.95
  13   5  -2    4.00    0.98
 -13  -5   2    1.66    0.89
 -13  -6   2    3.38    0.97
  13   7  -2   -0.74    1.08
 -13  -7   2    2.25    0.98
 -12   6   2    4.57    0.84
 -12   5   2    5.02    0.75
  12  -4  -2    9.72    1.09
 -12   4   2   10.07    0.96
  12  -3  -2   12.85    1.10
 -12   3   2   11.96    1.08
  12  -2  -2    4.30    0.69
  12  -2  -2    2.37    0.45
 -12   2   2    3.58    0.60
  12  -1  -2    2.39    0.59
  12  -1  -2    2.53    0.47
  12  -1  -2    2.59    0.72
  12  -1  -2    2.40    0.51
 -12   1   2    3.62    0.58
 -12   1   2    3.37    0.76
  12   0  -2    7.12    0.86
  12   0  -2    8.49    0.81
  12   0  -2    8.38    1.05
  12   0  -2    6.76    0.81
 -12   0   2    7.34    0.85
  12   1  -2    2.72    0.65
  12   1  -2    2.13    0.63
  12   1  -2    0.10    1.02
  12   2  -2    3.81    0.71
  12   2  -2    2.94    1.17
  12   2  -2    2.68    0.56
  12   3  -2   13.01    1.17
  12   3  -2   14.86    1.79
 -12  -3   2   12.79    1.14
  12   4  -2    9.69    1.09
  12   4  -2    8.49    1.71
 -12  -4   2   10.28    1.05
  12   5  -2    5.96    1.02
  12   5  -2    5.79    1.90
 -12  -5   2    3.01    0.87
  12   6  -2    3.82    1.04
 -12  -6   2    2.95    0.96
  12   7  -2    1.72    1.11
 -12  -7   2    2.21    1.00
  11  -5  -2   11.09    1.12
 -11   5   2    8.47    0.93
  11  -4  -2   10.34    1.02
 -11   4   2    8.11    0.85
  11  -3  -2    9.75    0.95
 -11   3   2    8.05    0.84
  11  -2  -2   19.27    1.41
  11  -2  -2   20.01    1.39
 -11   2   2   18.78    1.46
  11  -1  -2    8.64    0.79
  11  -1  -2    6.70    0.76
  11  -1  -2    7.97    0.78
  11  -1  -2    7.07    0.90
 -11   1   2    8.55    0.78
 -11   1   2    8.08    0.95
 -11   1   2    9.75    0.86
  11   0  -2   29.16    2.18
  11   0  -2   30.88    1.87
  11   0  -2   27.25    2.00
  11   0  -2   27.22    2.07
 -11   0   2   25.60    1.84
 -11   0   2   27.40    2.02
  11   1  -2    9.17    0.96
  11   1  -2    8.77    1.24
  11   1  -2   10.07    0.90
  11   2  -2   24.40    2.01
  11   2  -2   20.31    1.56
  11   3  -2   10.58    1.04
  11   3  -2   12.41    1.55
 -11  -3   2    9.77    0.97
  11   4  -2    9.83    1.06
  11   4  -2    9.41    1.65
 -11  -4   2   10.22    1.04
  11   5  -2   11.75    1.99
  11   5  -2    9.30    1.15
 -11  -5   2   10.31    1.09
  11   6  -2    5.04    1.05
 -11  -6   2    5.14    1.00
  11   7  -2    8.76    1.30
 -11  -7   2    8.28    1.21
  11   8  -2    1.24    1.18
 -11  -8   2    2.24    1.02
  10  -5  -2    1.79    0.80
  10  -4  -2    8.85    1.00
 -10   4   2    9.79    0.87
  10  -3  -2   22.28    1.52
 -10   3   2   20.43    1.55
  10  -2  -2   10.70    0.92
 -10   2   2   12.33    0.95
 -10   2   2    9.84    0.89
  10  -1  -2   41.26    2.94
  10  -1  -2   40.63    2.84
  10  -1  -2   44.80    2.62
 -10   1   2   39.76    2.60
 -10   1   2   39.24    2.87
  10   0  -2    6.66    0.69
  10   0  -2    4.77    0.63
  10   0  -2    2.68    0.89
 -10   0   2    5.40    0.62
 -10   0   2    3.82    0.68
 -10   0   2    4.38    0.62
  10   1  -2   49.40    3.83
  10   1  -2   52.84    3.69
  10   1  -2   50.87    3.35
  10   1  -2   55.68    3.89
  10   1  -2   49.43    3.35
 -10  -1   2   54.15    3.35
 -10  -1   2   62.02    3.86
  10   2  -2    9.30    1.32
  10   2  -2    9.39    0.88
 -10  -2   2    8.08    0.83
  10   3  -2   24.85    1.80
  10   3  -2   30.49    2.38
 -10  -3   2   24.93    1.77
  10   4  -2    9.23    1.63
  10   4  -2   10.06    1.03
 -10  -4   2    8.82    0.97
  10   5  -2    2.57    1.66
  10   5  -2    2.48    0.82
 -10  -5   2    2.17    0.80
  10   6  -2    6.08    1.02
 -10  -6   2    4.09    0.91
  10   7  -2    3.64    1.12
 -10  -7   2    3.48    0.96
  10   8  -2    3.14    1.19
 -10  -8   2    1.55    1.04
   9  -5  -2    5.14    0.85
   9  -4  -2    8.00    0.91
   9  -3  -2    4.61    0.69
  -9   3   2    6.22    0.63
   9  -2  -2   20.17    1.45
  -9   2   2   22.31    1.55
  -9   2   2   20.60    1.43
   9  -1  -2    3.24    0.54
   9  -1  -2    2.93    0.45
  -9   1   2    3.52    0.53
  -9   1   2    3.47    0.54
   9   0  -2   56.61    4.01
   9   0  -2   58.29    3.52
   9   0  -2   54.60    3.87
   9   0  -2   58.18    3.96
  -9   0   2   57.94    3.97
  -9   0   2   54.83    3.52
  -9   0   2   55.36    3.88
   9   1  -2    4.29    0.60
   9   1  -2    3.08    0.79
   9   1  -2    3.48    0.59
   9   1  -2    3.50    0.98
   9   1  -2    3.65    0.61
  -9  -1   2    3.22    0.54
  -9  -1   2    3.75    0.86
   9   2  -2   18.72    1.87
   9   2  -2   21.63    1.40
   9   2  -2   18.37    1.40
  -9  -2   2   19.08    1.40
  -9  -2   2   18.83    1.37
   9   3  -2    4.98    0.73
   9   3  -2    5.57    1.22
  -9  -3   2    4.42    0.66
   9   4  -2    9.13    1.55
   9   4  -2    9.77    0.99
  -9  -4   2    7.20    0.89
   9   5  -2    6.73    1.69
   9   5  -2    5.77    0.88
  -9  -5   2    3.88    0.76
   9   6  -2    5.80    1.03
  -9  -6   2    6.49    0.97
  -9  -7   2    2.95    0.97
   9   8  -2    2.48    1.15
   8  -7  -2    0.04    0.97
  -8   7   2    0.49    0.76
   8  -6  -2    4.26    0.93
   8  -5  -2    8.36    0.93
   8  -5  -2    4.70    0.90
  -8   5   2    7.38    0.83
   8  -4  -2   13.96    1.16
   8  -3  -2    1.88    0.56
  -8   3   2    2.26    0.52
  -8   3   2    2.10    0.42
   8  -2  -2   18.84    1.32
  -8   2   2   19.61    1.40
  -8   2   2   18.86    1.30
   8  -1  -2    7.26    0.70
   8  -1  -2    6.76    0.69
  -8   1   2    8.21    0.75
  -8   1   2    7.76    0.71
   8   0  -2   28.20    2.17
   8   0  -2   29.09    2.11
   8   0  -2   30.37    1.87
   8   0  -2   29.17    2.04
  -8   0   2   29.72    2.05
  -8   0   2   28.00    1.86
  -8   0   2   26.60    2.12
   8   1  -2    7.32    0.78
   8   1  -2    6.92    0.75
   8   1  -2    8.08    1.10
   8   1  -2    7.80    0.97
   8   1  -2    8.20    0.76
  -8  -1   2    7.27    0.73
  -8  -1   2   10.16    1.04
   8   2  -2   18.21    1.42
   8   2  -2   21.41    1.89
   8   2  -2   20.17    1.40
  -8  -2   2   19.75    1.41
  -8  -2   2   19.97    1.39
   8   3  -2    3.45    1.16
   8   3  -2    2.70    0.62
  -8  -3   2    2.47    0.57
   8   4  -2   15.31    1.19
   8   4  -2   15.56    1.80
  -8  -4   2   13.51    1.16
   8   5  -2   10.89    1.75
   8   5  -2   10.01    1.04
  -8  -5   2    9.49    1.02
   8   6  -2    4.50    0.90
  -8  -6   2    2.86    0.80
   8   7  -2    1.93    1.01
  -8  -7   2    1.23    0.87
   8   8  -2    3.33    1.18
  -7   7   2    1.38    0.83
  -7   6   2    0.56    0.67
   7  -5  -2    7.26    1.00
   7  -5  -2   10.78    0.97
  -7   5   2    7.10    0.84
   7  -4  -2    5.07    0.69
  -7   4   2    2.55    0.54
   7  -3  -2    7.55    0.75
  -7   3   2    6.99    0.73
   7  -2  -2    6.09    0.63
  -7   2   2    5.85    0.61
  -7   2   2    6.35    0.62
   7  -1  -2   73.89    4.25
   7  -1  -2   67.42    4.68
  -7   1   2   66.41    4.69
  -7   1   2   69.61    4.25
   7   0  -2   14.17    1.00
   7   0  -2   13.66    1.15
   7   0  -2   13.97    1.09
   7   0  -2   15.76    1.24
  -7   0   2   12.98    1.00
  -7   0   2   14.71    1.19
  -7   0   2   14.26    1.11
   7   1  -2   78.64    5.68
   7   1  -2   80.31    4.98
   7   1  -2   78.69    4.97
   7   1  -2   77.05    5.48
  -7  -1   2   81.42    4.96
  -7  -1   2   82.90    4.97
  -7  -1   2   89.21    5.68
   7   2  -2    7.55    0.72
   7   2  -2    6.20    0.69
   7   2  -2    3.33    1.11
  -7  -2   2    5.28    0.63
  -7  -2   2    5.35    0.64
   7   3  -2    6.76    1.30
   7   3  -2    8.40    0.82
   7   3  -2    7.37    0.94
  -7  -3   2    8.15    0.81
   7   4  -2    6.81    0.77
   7   4  -2    6.76    1.37
  -7  -4   2    4.59    0.69
   7   5  -2   12.85    1.12
   7   5  -2   10.31    1.70
  -7  -5   2   11.67    1.08
   7   6  -2    3.13    1.49
   7   6  -2    2.97    0.85
  -7  -6   2    2.58    0.83
   7   7  -2    2.80    1.05
  -7  -7   2    2.87    0.97
   7   8  -2    2.74    1.14
  -7  -8   2    3.07    1.07
   6  -6  -2    2.87    0.83
  -6   6   2    1.70    0.77
   6  -5  -2    1.06    0.80
   6  -5  -2    4.80    0.75
  -6   5   2    2.69    0.67
   6  -4  -2    8.87    0.77
   6  -4  -2    4.56    0.77
  -6   4   2    5.09    0.65
   6  -3  -2   11.20    0.91
  -6   3   2   11.43    0.89
   6  -2  -2   32.45    2.07
  -6   2   2   32.78    2.06
   6  -1  -2   54.09    3.65
   6  -1  -2   58.21    3.32
  -6   1   2   52.48    3.32
  -6   1   2   51.13    3.66
   6   0  -2    4.35    0.62
   6   0  -2    4.14    0.70
   6   0  -2    6.48    0.57
   6   0  -2    6.10    0.52
  -6   0   2    5.66    0.54
  -6   0   2    7.36    0.60
  -6   0   2    4.13    0.66
   6   1  -2   65.18    4.51
   6   1  -2   61.89    3.94
   6   1  -2   60.05    3.93
  -6  -1   2   67.99    4.51
  -6  -1   2   66.53    3.94
  -6  -1   2   63.53    3.93
   6   2  -2   30.05    1.92
   6   2  -2   24.83    2.36
   6   2  -2   28.93    1.93
  -6  -2   2   27.70    2.33
  -6  -2   2   32.80    1.91
  -6  -2   2   30.30    1.92
   6   3  -2   12.35    0.97
   6   3  -2   10.64    1.01
   6   3  -2   11.31    1.13
   6   3  -2   12.48    1.48
  -6  -3   2   10.41    0.93
   6   4  -2    7.40    1.36
   6   4  -2    8.45    0.83
  -6  -4   2    8.70    0.92
  -6  -4   2    6.58    0.80
   6   5  -2    5.28    0.84
   6   5  -2    6.76    1.40
  -6  -5   2    4.46    0.79
   6   6  -2    3.41    1.43
   6   6  -2    3.56    0.89
  -6  -6   2    4.44    0.82
   6   7  -2    5.05    1.06
  -6  -7   2    3.33    0.92
   6   8  -2    2.90    1.12
  -6  -8   2    1.74    1.02
   5  -6  -2    4.81    0.86
  -5   6   2    6.59    0.98
   5  -5  -2    3.52    0.69
  -5   5   2    2.02    0.69
   5  -4  -2    3.00    0.71
   5  -4  -2    6.45    0.69
  -5   4   2    3.80    0.63
   5  -3  -2    4.53    0.65
   5  -3  -2    5.63    0.63
  -5   3   2    4.02    0.55
  -5   3   2    6.35    0.61
   5  -2  -2    8.96    0.81
  -5   2   2   12.29    0.80
   5  -1  -2    4.08    0.41
  -5   1   2    4.49    0.43
  -5   1   2    3.69    0.40
   5   0  -2   33.46    2.04
   5   0  -2   30.50    2.30
   5   0  -2   34.91    2.25
   5   0  -2   32.26    2.32
  -5   0   2   31.98    2.03
  -5   0   2   32.86    2.31
  -5   0   2   33.70    2.25
   5   1  -2    3.55    0.69
   5   1  -2    4.18    0.44
   5   1  -2    3.52    0.44
  -5  -1   2    4.36    0.66
  -5  -1   2    4.75    0.43
  -5  -1   2    4.28    0.43
   5   2  -2    8.02    0.71
   5   2  -2    4.62    1.11
   5   2  -2    9.15    0.85
   5   2  -2    7.35    0.71
  -5  -2   2    7.91    0.67
  -5  -2   2    6.41    0.67
  -5  -2   2    5.32    0.96
   5   3  -2    7.21    0.72
   5   3  -2    7.14    1.27
   5   3  -2    6.63    0.74
   5   3  -2    7.89    0.90
  -5  -3   2    6.69    0.72
  -5  -3   2    6.36    0.78
   5   4  -2    8.20    1.25
   5   4  -2    5.83    0.78
   5   4  -2    7.55    0.89
  -5  -4   2    6.41    0.77
  -5  -4   2    6.88    0.83
   5   5  -2    3.32    0.77
   5   5  -2    4.61    1.24
   5   5  -2    3.63    0.83
  -5  -5   2    3.03    0.69
   5   6  -2    6.97    1.51
   5   6  -2    5.35    0.92
  -5  -6   2    6.16    0.88
   5   7  -2    2.39    0.92
  -5  -7   2    1.66    0.86
   5   8  -2    4.20    1.15
  -5  -8   2    3.67    1.04
  -4   7   2    1.46    1.04
   4  -6  -2    1.01    0.71
  -4   6   2    1.88    0.90
   4  -5  -2    4.38    0.74
  -4   5   2    4.39    0.83
   4  -4  -2    7.30    0.75
   4  -4  -2    5.62    0.86
  -4   4   2    6.95    0.82
   4  -3  -2    1.67    0.57
   4  -3  -2    1.62    0.50
  -4   3   2    0.82    0.49
  -4   3   2    1.57    0.48
   4  -2  -2   32.54    2.26
  -4   2   2   39.91    2.26
   4  -1  -2   22.39    1.33
  -4   1   2   20.02    1.32
   4   0  -2    4.05    0.49
   4   0  -2    4.81    0.38
  -4   0   2    6.11    0.42
  -4   0   2    4.33    0.48
  -4   0   2    4.31    0.37
   4   1  -2   23.14    1.46
   4   1  -2   22.74    1.46
   4   1  -2   23.14    1.72
  -4  -1   2   23.87    1.46
  -4  -1   2   24.85    1.46
  -4  -1   2   21.15    1.70
   4   2  -2   29.51    2.07
   4   2  -2   26.00    1.76
   4   2  -2   29.49    1.77
   4   2  -2   23.87    2.18
  -4  -2   2   29.75    1.76
  -4  -2   2   24.18    2.11
   4   3  -2    2.15    0.52
   4   3  -2    1.69    0.99
   4   3  -2    2.45    0.59
   4   3  -2    2.37    0.54
  -4  -3   2    1.91    0.53
  -4  -3   2    2.25    0.51
   4   4  -2    8.71    1.26
   4   4  -2    8.23    0.95
  -4  -4   2    8.65    0.82
  -4  -4   2    7.55    0.94
   4   5  -2    6.32    1.23
  -4  -5   2    5.14    0.81
  -4  -5   2    5.88    0.78
   4   6  -2    2.81    1.32
  -4  -6   2    2.78    0.76
   4   7  -2    1.76    1.58
  -4  -7   2   -0.05    0.81
  -4  -8   2    3.47    0.99
   3  -6  -2    1.05    0.76
  -3   6   2    2.17    0.96
   3  -5  -2    0.63    0.53
   3  -5  -2    0.53    0.61
  -3   5   2    1.16    0.82
   3  -4  -2    0.89    0.53
   3  -4  -2    1.70    0.72
  -3   4   2    1.36    0.72
   3  -3  -2   11.22    0.89
   3  -3  -2   10.05    1.09
  -3   3   2   10.78    1.03
  -3   3   2   11.00    0.86
  -3   2   2   12.58    0.86
  -3   2   2   12.54    0.96
   3  -1  -2   26.19    1.62
  -3   1   2   26.37    1.61
   3   0  -2    4.60    0.36
   3   0  -2    5.60    0.41
   3   0  -2    5.09    0.44
  -3   0   2    5.74    0.41
   3   1  -2   26.81    1.62
   3   1  -2   27.03    1.62
   3   1  -2   26.83    1.90
   3   1  -2   22.86    1.87
  -3  -1   2   27.91    1.62
  -3  -1   2   27.94    1.62
  -3  -1   2   22.34    1.86
   3   2  -2    5.89    0.60
   3   2  -2    8.62    0.70
   3   2  -2    4.28    0.89
  -3  -2   2    7.61    0.59
  -3  -2   2    7.90    0.68
  -3  -2   2    4.94    0.80
   3   3  -2   13.51    1.35
   3   3  -2   10.10    1.09
   3   3  -2   12.08    0.97
  -3  -3   2   11.71    0.93
  -3  -3   2   12.63    1.09
   3   4  -2    0.30    0.96
   3   4  -2    1.89    0.63
  -3  -4   2    0.69    0.57
  -3  -4   2    1.02    0.55
   3   5  -2    1.97    1.07
   3   5  -2    1.91    0.71
  -3  -5   2    2.49    0.67
  -3  -5   2    1.57    0.65
   3   6  -2    3.26    1.25
  -3  -6   2    2.42    0.78
   3   7  -2    3.38    1.60
  -3  -7   2    3.05    0.91
  -3  -8   2    3.18    1.01
   2  -7  -2    1.05    0.85
  -2   7   2    3.27    1.26
   2  -6  -2    1.81    0.76
  -2   6   2    0.71    1.06
   2  -5  -2    0.66    0.66
   2  -5  -2    1.20    0.55
  -2   5   2    3.56    0.87
   2  -4  -2    1.30    0.50
   2  -4  -2    2.34    0.79
   2  -4  -2    2.90    0.57
  -2   4   2    3.23    0.78
   2  -3  -2   10.47    0.85
   2  -3  -2    9.98    1.11
  -2   3   2   11.33    1.07
  -2   3   2    9.96    0.83
   2  -2  -2    9.43    0.89
   2  -2  -2    9.66    0.75
  -2   2   2   10.72    0.87
  -2   2   2   10.85    0.74
   2  -1  -2    0.92    0.15
  -2   1   2    0.84    0.13
   2   0  -2    0.01    0.06
   2   0  -2    0.17    0.09
  -2   0   2    0.08    0.07
  -2   0   2   -0.09    0.04
   2   1  -2    0.51    0.25
   2   1  -2    0.97    0.17
   2   1  -2    0.84    0.18
  -2  -1   2    0.89    0.15
  -2  -1   2    0.39    0.23
  -2  -1   2    1.01    0.16
   2   2  -2   11.93    0.93
   2   2  -2   11.20    0.81
   2   2  -2   10.37    1.05
  -2  -2   2   10.75    0.80
  -2  -2   2   13.38    0.95
  -2  -2   2    9.96    1.02
   2   3  -2   10.95    1.22
   2   3  -2   10.96    0.87
   2   3  -2   10.19    0.99
  -2  -3   2   10.20    0.85
  -2  -3   2   10.63    0.97
  -2  -3   2   10.96    1.17
   2   4  -2    3.01    0.97
   2   4  -2    3.38    0.68
  -2  -4   2    3.65    0.58
  -2  -4   2    2.70    0.59
   2   5  -2    3.27    1.09
   2   5  -2    2.04    0.71
  -2  -5   2    2.00    0.60
  -2  -5   2    1.93    0.59
   2   6  -2    1.55    1.17
  -2  -6   2    0.33    0.65
   2   7  -2    2.48    1.44
  -2  -7   2    1.59    0.82
  -2  -8   2    2.77    1.05
   1  -7  -2    1.78    0.86
   1  -6  -2    4.01    0.79
  -1   6   2    5.25    1.16
   1  -5  -2    0.29    0.58
   1  -5  -2    0.61    0.58
  -1   5   2    1.65    0.91
   1  -4  -2    8.30    0.77
   1  -4  -2    5.76    0.99
   1  -4  -2    5.72    0.78
  -1   4   2    8.66    1.05
   1  -3  -2    2.08    0.47
   1  -3  -2    1.31    0.71
   1  -3  -2    2.39    0.51
  -1   3   2    3.56    0.83
  -1   3   2    2.64    0.49
   1  -2  -2   13.13    0.99
   1  -2  -2   13.69    0.88
   1  -2  -2   10.05    1.07
   1   0  -2    0.21    0.05
   1   1  -2    8.16    0.65
   1   1  -2    8.77    0.55
   1   1  -2    9.10    0.64
  -1  -1   2    7.73    0.64
   1   2  -2   16.17    1.35
   1   2  -2   17.80    1.31
   1   2  -2   17.21    1.13
  -1  -2   2   19.09    1.13
  -1  -2   2   13.84    1.32
  -1  -2   2   17.83    1.30
   1   3  -2    2.22    0.53
   1   3  -2    2.33    0.51
   1   3  -2    3.12    0.82
  -1  -3   2    2.58    0.73
  -1  -3   2    2.79    0.52
  -1  -3   2    1.79    0.51
   1   4  -2    7.96    1.13
  -1  -4   2    6.01    0.78
  -1  -4   2    6.79    0.74
   1   5  -2    0.08    0.97
  -1  -5   2    0.89    0.58
  -1  -5   2    0.54    0.56
   1   6  -2    7.24    1.25
  -1  -6   2    3.84    0.76
  -1  -7   2    2.05    0.80
   0  -8  -2    4.02    1.11
   0  -7  -2    1.58    0.88
   0   7   2    1.53    1.30
   0  -6  -2    3.00    0.79
   0   6   2    4.50    1.15
   0  -5  -2    3.46    0.72
   0  -5  -2    4.33    0.68
   0   5   2    6.66    1.07
   0  -4  -2    5.89    0.68
   0  -4  -2    5.50    0.73
   0  -3  -2    1.19    0.74
   0  -3  -2    2.50    0.52
   0  -3  -2    3.00    0.49
   0   3   2    2.92    0.50
   0   3   2    2.09    0.84
   0  -2  -2   62.92    3.73
   0  -2  -2   63.89    4.38
   0  -2  -2   56.38    4.24
   0   2   2   56.45    3.72
   0   2   2   63.12    4.24
   0   2   2   62.22    4.38
   0   0  -2    0.04    0.03
   0   0  -2   -0.01    0.04
   0   0   2    0.05    0.01
   0   1  -2   78.33    5.59
   0   1  -2   74.68    5.70
   0  -1   2   83.51    5.59
   0  -1   2   97.06    5.70
   0   2  -2   67.60    4.50
   0   2  -2   62.08    3.97
   0  -2   2   64.44    3.97
   0  -2   2   68.69    4.50
   0  -2   2   62.52    4.67
   0   3  -2    2.59    0.51
   0   3  -2    1.88    0.72
   0  -3   2    2.59    0.66
   0  -3   2    1.79    0.49
   0  -3   2    2.44    0.47
   0   4  -2    5.95    1.02
   0  -4   2    8.00    0.86
   0  -4   2    6.78    0.74
   0   5  -2    5.36    1.01
   0  -5   2    3.25    0.69
   0  -5   2    5.04    0.75
   0   6  -2    4.84    1.11
   0  -6   2    1.64    0.74
   0  -7   2    1.49    0.77
  -1  -8  -2    3.25    1.05
  -1  -7  -2    1.45    0.92
   1   7   2    2.32    1.37
  -1  -6  -2    5.23    0.90
   1   6   2    5.35    1.27
  -1  -5  -2   -0.60    0.65
  -1  -5  -2    0.28    0.56
   1   5   2   -0.40    1.03
  -1  -4  -2    5.87    0.75
  -1  -4  -2    7.41    0.79
   1   4   2    9.52    1.22
   1   4   2    5.70    0.80
  -1  -3  -2    1.56    0.49
  -1  -3  -2    1.72    0.78
  -1  -3  -2    2.74    0.52
   1   3   2    2.78    0.88
   1   3   2    3.12    0.49
   1   3   2    2.23    0.51
  -1  -2  -2   17.13    1.42
  -1  -2  -2   15.62    1.21
  -1  -2  -2   14.44    1.49
   1   2   2   18.29    1.50
   1   2   2   21.25    1.22
   1   2   2   21.55    1.43
   1   2   2   21.94    1.22
  -1  -1  -2    8.35    0.48
  -1  -1  -2    6.98    0.56
  -1  -1  -2    8.68    0.59
  -1  -1  -2    8.03    0.59
   1   1   2    5.46    0.46
   1   1   2    6.41    0.54
  -1   0  -2   -0.07    0.04
  -1   0  -2   -0.03    0.05
   1   0   2    0.00    0.04
   1   0   2    0.03    0.03
  -1   1  -2    9.49    0.63
  -1   1  -2    9.08    0.59
   1  -1   2    9.00    0.63
   1  -1   2    7.75    0.58
   1  -1   2    9.90    0.66
  -1   2  -2   18.87    1.18
  -1   2  -2   18.76    1.35
   1  -2   2   17.89    1.18
   1  -2   2   16.65    1.35
  -1   3  -2    2.11    0.65
  -1   3  -2    1.61    0.51
   1  -3   2    1.44    0.63
   1  -3   2    1.80    0.49
  -1   4  -2    4.72    0.93
   1  -4   2    5.42    0.69
   1  -4   2    5.63    0.70
  -1   5  -2    0.94    0.86
   1  -5   2    1.10    0.58
   1  -5   2    0.13    0.50
  -1   6  -2    5.60    1.17
   1  -6   2    5.43    0.86
   1  -7   2    1.48    0.86
  -2  -7  -2    3.55    0.94
   2   7   2    5.74    1.50
  -2  -6  -2    1.67    0.73
   2   6   2    1.44    1.22
  -2  -5  -2    0.83    0.63
  -2  -5  -2    1.17    0.62
   2   5   2    5.40    1.26
   2   5   2    2.32    0.72
  -2  -4  -2    2.99    0.60
  -2  -4  -2    2.12    0.61
   2   4   2    2.94    0.63
   2   4   2    5.12    1.09
  -2  -3  -2   10.75    1.23
  -2  -3  -2   10.95    1.03
  -2  -3  -2   11.31    0.91
   2   3   2   14.48    1.39
   2   3   2   12.30    0.92
   2   3   2   11.36    1.05
   2   3   2   10.42    0.90
  -2  -2  -2   11.37    0.84
  -2  -2  -2   12.15    0.83
  -2  -2  -2   10.71    0.96
  -2  -2  -2    9.32    1.10
   2   2   2   12.09    1.11
   2   2   2   13.22    0.98
   2   2   2   11.42    1.10
   2   2   2   12.44    0.83
   2   2   2   12.56    0.83
  -2  -1  -2    0.71    0.24
  -2  -1  -2    0.94    0.17
  -2  -1  -2    0.94    0.18
  -2  -1  -2    0.50    0.25
   2   1   2    0.84    0.27
   2   1   2    0.94    0.19
   2   1   2    0.79    0.24
   2   1   2    0.93    0.17
  -2   0  -2   -0.05    0.06
  -2   0  -2    0.21    0.08
   2   0   2   -0.01    0.08
   2   0   2   -0.05    0.09
  -2   1  -2    1.33    0.18
  -2   1  -2    1.16    0.15
  -2   1  -2    1.25    0.16
   2  -1   2    0.86    0.17
   2  -1   2    1.24    0.17
   2  -1   2    0.97    0.14
  -2   2  -2   11.88    0.94
  -2   2  -2   13.08    0.84
   2  -2   2   11.30    0.84
   2  -2   2   11.61    0.96
  -2   3  -2   11.66    1.08
  -2   3  -2   10.04    0.91
   2  -3   2   12.82    1.11
   2  -3   2   11.84    0.92
  -2   4  -2    1.99    0.72
   2  -4   2    2.24    0.59
  -2   5  -2    1.27    0.83
   2  -5   2    1.76    0.55
   2  -5   2    1.62    0.60
  -2   6  -2    0.53    0.97
   2  -6   2    0.88    0.65
   2  -7   2    1.35    0.85
  -3  -7  -2    1.64    0.90
   3   7   2    2.17    0.94
  -3  -6  -2    2.33    0.76
   3   6   2    3.09    1.38
   3   6   2    2.14    0.77
  -3  -5  -2    2.06    0.66
  -3  -5  -2    1.11    0.63
   3   5   2    1.79    1.18
   3   5   2    1.24    0.65
   3   5   2    1.90    0.70
  -3  -4  -2    1.19    0.55
  -3  -4  -2    1.16    0.58
   3   4   2    0.77    1.04
   3   4   2    0.35    0.60
   3   4   2    1.50    0.61
  -3  -3  -2   11.62    1.35
  -3  -3  -2   12.16    0.94
  -3  -3  -2    9.79    1.04
   3   3   2   12.06    0.94
   3   3   2   10.49    1.08
   3   3   2   15.81    1.49
   3   3   2   11.94    0.94
  -3  -2  -2    7.63    0.65
  -3  -2  -2    7.98    0.65
  -3  -2  -2    5.05    0.88
   3   2   2    9.86    0.93
   3   2   2    7.58    0.93
  -3  -1  -2   22.67    1.41
  -3  -1  -2   23.02    1.41
  -3  -1  -2   21.20    1.62
  -3  -1  -2   23.01    1.62
   3   1   2   21.86    1.62
   3   1   2   21.74    1.61
  -3   0  -2    4.16    0.36
  -3   0  -2    4.46    0.34
  -3   0  -2    4.17    0.34
   3   0   2    4.23    0.36
   3   0   2    4.14    0.34
  -3   1  -2   22.91    1.42
  -3   1  -2   23.45    1.55
  -3   1  -2   23.10    1.58
   3  -1   2   22.50    1.42
   3  -1   2   21.48    1.54
   3  -1   2   22.61    1.58
  -3   2  -2    9.48    0.79
  -3   2  -2   10.86    0.73
  -3   2  -2    9.81    0.73
   3  -2   2    8.04    0.80
   3  -2   2    9.35    0.73
  -3   3  -2   11.05    1.00
  -3   3  -2   11.50    0.90
   3  -3   2   10.85    0.90
   3  -3   2   10.76    1.05
  -3   4  -2    0.30    0.63
   3  -4   2    1.00    0.57
  -3   5  -2    0.40    0.77
   3  -5   2    0.68    0.60
  -3   6  -2    2.76    0.97
   3  -6   2    1.31    0.72
   3  -7   2    2.83    0.82
  -4  -7  -2    0.96    0.90
   4   7   2    1.67    0.98
  -4  -6  -2    2.70    0.79
   4   6   2    4.09    0.87
   4   6   2    3.49    1.52
  -4  -5  -2    4.81    0.80
   4   5   2    4.88    1.32
   4   5   2    5.88    0.83
  -4  -4  -2    8.05    0.83
  -4  -4  -2    8.22    0.96
   4   4   2    8.26    0.85
   4   4   2    7.81    1.29
   4   4   2    7.81    0.98
  -4  -3  -2    2.49    0.54
  -4  -3  -2    1.46    0.54
   4   3   2    2.75    0.55
   4   3   2    1.56    0.52
   4   3   2    1.39    1.02
   4   3   2    2.04    0.59
  -4  -2  -2   26.36    1.98
  -4  -2  -2   27.49    1.99
   4   2   2   35.88    2.00
   4   2   2   32.33    2.33
   4   2   2   31.08    2.37
   4   2   2   36.19    2.00
   4   2   2   28.40    2.36
  -4  -1  -2   18.83    1.26
  -4  -1  -2   19.95    1.26
  -4  -1  -2   19.67    1.45
  -4  -1  -2   20.22    1.47
   4   1   2   20.51    1.26
   4   1   2   18.19    1.46
   4   1   2   18.83    1.46
   4   1   2   19.24    1.26
  -4   0  -2    4.02    0.36
  -4   0  -2    3.79    0.40
  -4   0  -2    4.28    0.39
   4   0   2    3.53    0.37
   4   0   2    4.18    0.38
   4   0   2    4.60    0.40
  -4   1  -2   19.26    1.22
  -4   1  -2   19.67    1.35
  -4   1  -2   19.02    1.32
   4  -1   2   20.24    1.35
   4  -1   2   18.21    1.21
   4  -1   2   17.86    1.31
  -4   2  -2   33.31    2.13
  -4   2  -2   32.16    1.97
  -4   2  -2   31.71    2.20
   4  -2   2   29.36    1.97
   4  -2   2   28.51    2.19
  -4   3  -2    1.89    0.49
  -4   3  -2    0.90    0.51
   4  -3   2    1.39    0.55
   4  -3   2    1.37    0.50
  -4   4  -2    6.69    0.78
   4  -4   2    5.80    0.72
   4  -4   2    6.59    0.87
  -4   5  -2    4.98    0.85
   4  -5   2    5.59    0.77
  -4   6  -2    2.04    0.92
   4  -6   2    2.32    0.76
   4  -7   2   -0.40    0.78
   4  -8   2    4.50    1.01
  -5  -8  -2    3.89    1.12
   5   8   2    4.37    1.19
  -5  -7  -2    2.59    0.97
   5   7   2    1.92    0.97
  -5  -6  -2    5.77    0.93
   5   6   2    7.42    1.69
   5   6   2    7.63    0.97
  -5  -5  -2    2.40    0.69
   5   5   2    4.34    0.85
   5   5   2    2.27    1.31
   5   5   2    3.52    0.75
  -5  -4  -2    5.13    0.72
  -5  -4  -2    3.97    0.67
   5   4   2    5.97    0.73
   5   4   2    5.29    1.18
   5   4   2    5.55    0.83
  -5  -3  -2    4.76    0.69
   5   3   2    6.08    0.81
   5   3   2    5.57    0.74
   5   3   2    7.16    0.73
   5   3   2    8.43    1.20
  -5  -2  -2    8.57    0.72
  -5  -2  -2    4.81    0.97
  -5  -2  -2    7.30    0.72
   5   2   2    8.11    1.04
   5   2   2    7.33    0.98
  -5  -1  -2    3.18    0.41
  -5  -1  -2    3.05    0.55
  -5  -1  -2    2.57    0.59
   5   1   2    3.73    0.44
   5   1   2    2.32    0.54
   5   1   2    2.33    0.59
   5   1   2    3.95    0.45
  -5   0  -2   28.56    1.93
  -5   0  -2   28.65    1.98
  -5   0  -2   27.84    1.77
   5   0   2   28.73    1.98
   5   0   2   26.15    1.77
   5   0   2   27.99    1.93
  -5   1  -2    3.07    0.42
  -5   1  -2    3.10    0.42
  -5   1  -2    5.20    0.45
   5  -1   2    3.50    0.41
   5  -1   2    3.15    0.36
   5  -1   2    3.70    0.43
  -5   2  -2    8.63    0.72
  -5   2  -2    8.49    0.72
  -5   2  -2    8.59    0.70
   5  -2   2    8.38    0.68
   5  -2   2    6.68    0.72
   5  -2   2    8.09    0.70
  -5   3  -2    7.75    0.63
  -5   3  -2    5.14    0.67
  -5   3  -2    6.09    0.66
   5  -3   2    5.99    0.69
   5  -3   2    5.09    0.70
  -5   4  -2    5.08    0.70
   5  -4   2    4.20    0.74
   5  -4   2    5.15    0.66
  -5   5  -2    3.66    0.74
   5  -5   2    3.02    0.69
  -5   6  -2    5.20    0.95
   5  -6   2    5.49    0.85
   5  -7   2    2.12    0.88
  -6  -7  -2    3.61    0.93
  -6  -6  -2    2.41    0.76
   6   6   2    3.24    1.58
   6   6   2    2.92    0.82
  -6  -5  -2    3.25    0.73
   6   5   2    4.63    0.80
   6   5   2    5.32    1.38
  -6  -4  -2    6.69    0.81
   6   4   2   10.27    1.36
   6   4   2    8.54    1.00
   6   4   2    9.61    0.87
  -6  -3  -2   10.04    0.98
   6   3   2   12.42    1.20
   6   3   2   13.69    1.52
   6   3   2   13.17    1.01
  -6  -2  -2   25.95    1.83
  -6  -2  -2   25.68    2.25
  -6  -2  -2   26.65    1.82
   6   2   2   26.11    2.20
   6   2   2   28.61    2.24
   6   2   2   31.04    1.85
   6   2   2   29.42    1.84
  -6  -1  -2   51.42    3.21
  -6  -1  -2   53.50    3.66
  -6  -1  -2   51.11    3.64
   6   1   2   48.53    3.64
   6   1   2   50.05    3.21
   6   1   2   55.18    3.22
   6   1   2   51.30    3.67
  -6   0  -2    4.18    0.47
  -6   0  -2    5.27    0.60
  -6   0  -2    4.68    0.50
   6   0   2    4.44    0.50
   6   0   2    4.17    0.46
   6   0   2    4.86    0.54
  -6   1  -2   48.26    3.07
  -6   1  -2   49.48    3.43
  -6   1  -2   47.98    3.37
   6  -1   2   51.58    3.08
   6  -1   2   52.34    3.43
   6  -1   2   47.79    3.36
  -6   2  -2   26.81    1.73
  -6   2  -2   27.46    1.87
  -6   2  -2   26.21    1.91
   6  -2   2   25.72    1.91
   6  -2   2   27.15    1.75
   6  -2   2   26.89    1.86
  -6   3  -2    9.52    0.90
  -6   3  -2   10.17    0.84
   6  -3   2   10.59    0.91
   6  -3   2   10.66    0.94
  -6   4  -2    7.20    0.83
   6  -4   2    7.02    0.86
   6  -4   2    8.43    0.82
  -6   5  -2    4.49    0.79
   6  -5   2    4.76    0.75
   6  -6   2    4.07    0.92
   6  -7   2    3.07    0.93
   6  -8   2   -0.67    0.93
  -7  -7  -2    3.49    0.94
   7   7   2    4.78    1.03
  -7  -6  -2    2.52    0.79
   7   6   2    3.49    0.92
   7   6   2    3.85    1.63
  -7  -5  -2    8.63    0.99
   7   5   2   12.50    1.65
   7   5   2   11.51    1.07
  -7  -4  -2    3.60    0.71
   7   4   2    5.21    0.75
   7   4   2    6.96    1.29
  -7  -3  -2    7.05    0.78
   7   3   2    5.66    1.22
   7   3   2    7.87    0.93
   7   3   2    8.22    0.82
  -7  -2  -2    4.02    0.59
  -7  -2  -2    3.99    0.60
   7   2   2    4.99    0.63
   7   2   2    4.41    0.65
   7   2   2    4.72    0.98
  -7  -1  -2   71.31    4.87
  -7  -1  -2   67.26    4.84
  -7  -1  -2   68.44    4.29
   7   1   2   68.91    4.85
   7   1   2   69.22    4.29
   7   1   2   66.94    4.30
   7   1   2   73.74    4.88
  -7   0  -2   12.37    1.08
  -7   0  -2   13.54    0.99
  -7   0  -2   11.54    0.95
   7   0   2   13.39    0.99
   7   0   2   12.42    1.02
   7   0   2   11.30    0.95
  -7   1  -2   63.94    4.42
  -7   1  -2   64.56    3.95
  -7   1  -2   61.72    4.34
   7  -1   2   67.42    4.41
   7  -1   2   62.47    3.95
   7  -1   2   63.55    4.33
  -7   2  -2    4.51    0.56
  -7   2  -2    6.90    0.63
   7  -2   2    3.99    0.60
   7  -2   2    4.62    0.53
   7  -2   2    4.13    0.53
  -7   3  -2    6.15    0.64
  -7   3  -2    5.97    0.67
   7  -3   2    6.54    0.72
   7  -3   2    6.39    0.70
  -7   4  -2    4.18    0.64
   7  -4   2    2.54    0.68
   7  -4   2    3.81    0.70
  -7   5  -2   10.93    1.09
  -7   5  -2   10.32    0.93
   7  -5   2    9.21    1.02
   7  -6   2    2.34    0.82
  -8  -8  -2    2.66    1.04
  -8  -7  -2    2.21    0.92
   8   7   2    2.02    1.04
  -8  -6  -2    3.38    0.83
   8   6   2    4.09    1.68
   8   6   2    3.27    0.94
  -8  -5  -2    9.77    1.02
   8   5   2    8.10    1.02
   8   5   2    8.21    1.58
  -8  -4  -2   13.40    1.22
   8   4   2   19.54    1.83
   8   4   2   14.81    1.23
  -8  -3  -2    1.37    0.56
   8   3   2    2.18    0.62
   8   3   2    1.96    1.07
  -8  -2  -2   16.23    1.30
   8   2   2   18.70    1.35
   8   2   2   18.17    1.68
  -8  -1  -2    6.82    0.92
  -8  -1  -2    6.94    0.70
   8   1   2    6.46    0.72
   8   1   2    6.37    0.70
   8   1   2    7.27    0.78
   8   1   2    7.27    0.97
   8   1   2    5.44    0.81
  -8   0  -2   27.01    1.75
  -8   0  -2   26.32    1.87
  -8   0  -2   27.05    1.96
   8   0   2   25.22    1.74
   8   0   2   25.22    1.87
   8   0   2   27.52    1.93
   8   0   2   25.38    1.96
  -8   1  -2    6.87    0.72
  -8   1  -2    6.17    0.71
  -8   1  -2    6.91    0.69
   8  -1   2    5.99    0.67
   8  -1   2    6.35    0.67
   8  -1   2    6.19    0.67
  -8   2  -2   17.49    1.25
  -8   2  -2   16.75    1.19
  -8   2  -2   16.28    1.26
   8  -2   2   15.91    1.19
   8  -2   2   16.06    1.25
   8  -2   2   16.20    1.21
  -8   3  -2    1.75    0.44
  -8   3  -2    1.57    0.46
   8  -3   2    1.40    0.46
   8  -3   2    0.88    0.56
  -8   4  -2   12.93    1.11
  -8   4  -2   13.95    1.05
   8  -4   2   11.87    1.17
   8  -4   2   13.11    1.10
  -8   5  -2    9.56    1.02
  -8   5  -2    8.81    0.90
   8  -5   2   10.20    1.01
   8  -6   2    3.55    0.90
  -9  -8  -2    2.45    1.01
  -9  -7  -2    2.02    0.96
   9   7   2    3.16    1.06
  -9  -6  -2    5.13    0.93
   9   6   2    4.67    1.81
   9   6   2    5.36    1.01
  -9  -5  -2    3.89    0.77
   9   5   2    4.90    1.50
   9   5   2    4.84    0.89
  -9  -4  -2    5.25    0.79
   9   4   2    5.34    1.40
   9   4   2    6.17    0.88
  -9  -3  -2    4.16    0.68
   9   3   2    3.33    1.16
   9   3   2    5.20    0.75
   9   2   2   18.56    1.82
   9   2   2   19.88    1.43
  -9  -1  -2    1.98    0.53
  -9  -1  -2    2.11    0.79
   9   1   2    1.94    0.84
   9   1   2    1.45    0.56
   9   1   2    2.53    0.52
   9   1   2    3.03    0.65
  -9   0  -2   51.04    3.53
  -9   0  -2   51.26    3.65
  -9   0  -2   50.92    3.24
   9   0   2   49.61    3.24
   9   0   2   53.29    3.64
   9   0   2   52.00    3.54
   9   0   2   52.11    3.63
  -9   1  -2    2.38    0.56
  -9   1  -2    3.19    0.57
  -9   1  -2    3.05    0.53
   9  -1   2    3.31    0.57
   9  -1   2    2.92    0.50
   9  -1   2    2.83    0.48
  -9   2  -2   22.27    1.40
  -9   2  -2   16.95    1.40
   9  -2   2   15.97    1.39
   9  -2   2   18.63    1.35
   9  -2   2   18.11    1.32
  -9   3  -2    5.25    0.58
  -9   3  -2    4.13    0.60
   9  -3   2    4.28    0.57
   9  -3   2    4.91    0.68
  -9   4  -2    6.87    0.80
  -9   4  -2    8.48    0.76
   9  -4   2    5.96    0.85
   9  -4   2    5.61    0.79
  -9   5  -2    5.71    0.78
  -9   5  -2    4.82    0.68
   9  -5   2    3.61    0.82
  -9   6  -2    6.54    0.83
   9  -6   2    3.21    0.93
 -10  -7  -2    2.26    1.00
  10   7   2    3.10    1.11
 -10  -6  -2    5.15    0.97
  10   6   2    5.93    1.07
 -10  -5  -2    1.32    0.76
  10   5   2    0.79    0.82
  10   5   2    1.84    1.46
 -10  -4  -2    6.76    0.88
  10   4   2    7.49    1.49
  10   4   2    7.98    0.95
 -10  -3  -2   21.36    1.56
  10   3   2   21.46    2.05
  10   3   2   21.41    1.58
  10   2   2    7.24    1.15
  10   2   2    9.39    0.91
 -10  -1  -2   50.08    3.52
  10   1   2   51.75    3.55
  10   1   2   49.68    3.36
  10   1   2   42.30    3.07
 -10   0  -2    4.01    0.54
 -10   0  -2    1.86    0.74
  10   0   2    2.61    0.64
  10   0   2    2.60    0.72
  10   0   2    3.47    0.62
  10   0   2    4.04    0.54
 -10   1  -2   39.87    2.86
 -10   1  -2   38.74    2.81
  10  -1   2   39.30    2.57
  10  -1   2   43.00    2.85
  10  -1   2   39.46    2.79
 -10   2  -2    8.77    0.81
 -10   2  -2    7.90    0.84
  10  -2   2    7.62    0.80
  10  -2   2    9.21    0.85
  10  -2   2    8.80    0.78
 -10   3  -2   22.07    1.62
 -10   3  -2   20.74    1.59
  10  -3   2   22.35    1.55
  10  -3   2   21.51    1.62
 -10   4  -2    7.83    0.89
 -10   4  -2    9.58    0.88
  10  -4   2   10.09    1.00
  10  -4   2    8.14    0.92
 -10   5  -2    2.19    0.69
 -10   5  -2    1.62    0.62
  10  -5   2    3.11    0.85
 -10   6  -2    5.13    0.79
  10  -6   2    3.32    0.94
 -11  -7  -2    5.38    1.08
  11   7   2    6.21    1.22
 -11  -6  -2    4.30    0.94
  11   6   2    4.81    1.10
 -11  -5  -2    8.61    1.01
  11   5   2    9.03    1.12
  11   5   2    6.10    1.72
 -11  -4  -2    6.16    0.91
  11   4   2    8.81    1.00
  11   4   2    8.18    1.58
 -11  -3  -2    7.77    0.89
  11   3   2    9.75    0.97
  11   3   2    7.70    1.41
  11   2   2   18.69    1.45
  11   2   2   19.71    1.84
 -11  -1  -2    8.31    1.08
  11   1   2    7.97    1.13
  11   1   2    6.68    0.81
  11   1   2    8.55    0.91
 -11   0  -2   23.96    1.93
 -11   0  -2   23.73    1.81
  11   0   2   26.40    1.94
  11   0   2   24.15    1.70
  11   0   2   25.72    1.82
 -11   1  -2    8.97    0.84
 -11   1  -2    7.11    0.86
  11  -1   2    8.01    0.79
  11  -1   2    8.08    0.80
  11  -1   2    6.08    0.77
 -11   2  -2   18.35    1.43
 -11   2  -2   18.98    1.40
  11  -2   2   19.02    1.34
  11  -2   2   17.50    1.35
  11  -2   2   17.14    1.39
 -11   3  -2    9.68    0.87
 -11   3  -2    7.95    0.88
  11  -3   2    8.01    0.84
  11  -3   2    7.79    0.93
 -11   4  -2    8.48    0.90
 -11   4  -2    8.33    0.90
  11  -4   2    9.24    1.01
 -11   5  -2    8.75    0.95
 -11   5  -2    9.95    1.00
  11  -5   2    9.68    1.11
 -11   6  -2    4.02    0.82
  11  -6   2    4.28    1.02
  11  -7   2    5.85    1.16
 -12  -6  -2    2.19    0.95
  12   6   2    4.33    1.08
 -12  -5  -2    2.43    0.88
  12   5   2    5.55    1.72
  12   5   2    5.01    0.97
 -12  -4  -2    8.90    0.97
  12   4   2    8.58    1.06
  12   4   2    9.09    1.67
 -12  -3  -2   12.50    1.14
  12   3   2   13.03    1.22
  12   3   2   10.66    1.61
  12   2   2    2.73    0.52
  12   2   2    2.13    0.67
  12   2   2    3.10    1.03
 -12  -1  -2    0.59    0.92
  12   1   2    2.08    0.97
  12   1   2    2.10    0.63
  12   1   2    2.74    0.62
 -12   0  -2    7.35    0.95
 -12   0  -2    6.89    0.72
  12   0   2    5.67    0.70
  12   0   2    7.81    0.94
  12   0   2    7.15    0.81
 -12   1  -2    1.76    0.67
 -12   1  -2    3.07    0.56
  12  -1   2    2.84    0.63
  12  -1   2    2.89    0.49
  12  -1   2    1.46    0.57
 -12   2  -2    2.64    0.65
 -12   2  -2    2.88    0.59
  12  -2   2    1.80    0.55
  12  -2   2    3.82    0.71
 -12   3  -2   11.11    1.05
 -12   3  -2   10.62    1.06
  12  -3   2   11.34    1.08
  12  -3   2   11.64    1.00
 -12   4  -2    9.87    0.98
 -12   4  -2    9.75    1.03
  12  -4   2   10.63    1.11
 -12   5  -2    6.17    0.87
 -12   5  -2    4.64    0.77
  12  -5   2    4.37    0.99
 -12   6  -2    2.89    0.79
 -13  -7  -2    2.25    1.00
  13   7   2    1.28    1.16
 -13  -6  -2    2.41    0.95
  13   6   2    1.93    1.06
 -13  -5  -2   -0.05    0.82
  13   5   2    1.31    0.96
  13   5   2   -0.78    1.65
 -13  -4  -2    4.75    0.82
  13   4   2    5.52    0.95
  13   3   2    2.72    0.79
  13   3   2    0.77    1.28
  13   2   2   12.92    1.17
  13   2   2    9.54    1.47
  13   2   2   11.87    1.09
 -13  -1  -2    5.05    1.08
  13   1   2    4.27    1.11
  13   1   2    4.55    0.77
  13   1   2    4.68    0.75
 -13   0  -2    4.91    1.01
 -13   0  -2    8.15    0.82
  13   0   2    5.61    1.02
  13   0   2    6.00    0.70
  13   0   2    6.26    0.83
 -13   1  -2    4.01    0.81
 -13   1  -2    4.88    0.68
  13  -1   2    5.52    0.77
  13  -1   2    3.70    0.63
 -13   2  -2   11.21    1.16
 -13   2  -2   14.87    1.15
  13  -2   2   10.29    1.09
 -13   3  -2    2.39    0.71
 -13   3  -2    3.26    0.66
  13  -3   2    2.26    0.82
  13  -3   2    3.29    0.59
 -13   4  -2    6.62    0.83
 -13   4  -2    7.64    0.95
  13  -4   2    5.62    1.00
 -13   5  -2    2.00    0.82
 -13   5  -2    3.03    0.73
  13  -5   2    1.34    0.98
 -13   6  -2    2.85    0.82
 -14  -6  -2    2.20    1.01
  14   6   2    3.38    1.12
 -14  -5  -2    1.45    0.83
  14   5   2    2.75    0.99
 -14  -4  -2    2.44    0.82
  14   4   2    2.61    0.95
  14   3   2   10.63    1.80
  14   3   2   12.53    1.20
  14   2   2    8.42    1.45
  14   2   2    8.50    1.04
  14   2   2   10.49    1.08
 -14  -1  -2    6.49    1.16
  14   1   2    5.69    0.85
  14   1   2    4.95    1.17
  14   1   2    6.02    0.83
 -14   0  -2    0.69    0.89
 -14   0  -2    2.00    0.57
  14   0   2    2.44    0.74
  14   0   2    2.54    0.55
  14   0   2    0.46    0.90
 -14   1  -2    5.94    0.80
 -14   1  -2    6.25    0.97
  14  -1   2    6.42    0.91
  14  -1   2    7.05    0.89
 -14   2  -2    7.83    1.02
 -14   2  -2    9.50    1.00
  14  -2   2    9.93    1.06
 -14   3  -2   12.64    1.17
 -14   3  -2   12.01    1.21
  14  -3   2   12.80    1.21
 -14   4  -2    2.16    0.80
 -14   4  -2    2.99    0.76
  14  -4   2    3.18    0.97
 -14   5  -2    2.18    0.77
  14  -5   2    1.08    0.98
 -14   6  -2    2.88    0.85
  15   7   2    3.13    1.22
 -15  -5  -2    1.72    0.87
  15   5   2    3.21    1.09
  15   4   2    5.04    1.75
  15   4   2    5.22    1.05
  15   3   2    1.19    1.45
  15   3   2    4.73    0.96
  15   2   2    5.63    1.42
  15   2   2    7.75    0.92
  15   2   2    7.63    1.03
 -15  -1  -2    7.88    1.29
  15   1   2    8.89    1.32
  15   1   2    7.77    1.01
  15   1   2    8.57    0.98
 -15   0  -2   14.62    1.46
 -15   0  -2   12.95    1.19
  15   0   2   14.52    1.25
  15   0   2   11.79    1.46
 -15   1  -2    7.05    0.87
 -15   1  -2    7.01    1.07
  15  -1   2    5.89    1.00
  15  -1   2    8.80    0.96
 -15   2  -2    7.58    0.90
 -15   2  -2    7.75    1.03
  15  -2   2    7.28    1.02
 -15   3  -2    4.21    0.78
  15  -3   2    5.43    0.99
 -15   4  -2    5.24    0.95
 -15   4  -2    5.60    0.86
  15  -4   2    5.21    1.09
 -15   5  -2    4.54    0.88
  15  -5   2    4.50    1.10
 -15   6  -2    1.26    0.84
 -16  -6  -2    2.94    0.95
  16   6   2    2.46    1.16
 -16  -5  -2    3.08    0.96
  16   5   2    3.83    1.11
  16   4   2    3.39    1.09
  16   3   2    4.31    0.75
  16   3   2    5.24    1.06
  16   2   2    1.64    0.90
  16   2   2    3.19    0.80
  16   2   2    0.58    1.33
 -16  -1  -2    4.13    1.27
  16   1   2    6.32    0.95
  16   1   2    4.11    1.28
 -16   0  -2   12.69    1.15
 -16   0  -2   10.78    1.45
  16   0   2   11.41    1.21
  16   0   2   11.52    1.47
 -16   1  -2    6.11    0.87
 -16   1  -2    6.13    1.09
  16  -1   2    6.23    0.97
  16  -1   2    5.07    1.05
 -16   2  -2    2.71    0.93
 -16   2  -2    2.64    0.76
  16  -2   2    2.99    0.92
 -16   3  -2    5.67    1.01
 -16   3  -2    6.51    0.93
  16  -3   2    6.43    1.12
 -16   4  -2    3.06    0.84
  16  -4   2    2.82    1.07
 -16   5  -2    3.15    0.90
 -16   6  -2    3.69    0.93
 -17  -6  -2    0.90    0.96
  17   6   2    2.77    1.20
  17   4   2    3.56    1.13
  17   3   2    4.49    1.10
  17   3   2    1.09    0.76
  17   2   2    6.15    1.62
  17   2   2    8.63    1.19
 -17  -1  -2    2.40    1.33
  17   1   2    2.15    1.34
  17   1   2    3.12    0.97
 -17   0  -2   12.77    1.33
 -17   0  -2   17.58    1.79
  17   0   2   16.88    1.42
  17   0   2   14.70    1.73
 -17   1  -2    3.13    0.76
 -17   1  -2    3.32    1.06
  17  -1   2    2.69    1.02
  17  -1   2    3.77    0.93
 -17   2  -2    6.31    1.14
 -17   2  -2    6.40    0.94
  17  -2   2    5.91    1.08
 -17   3  -2    2.52    0.84
  17  -3   2    3.09    1.07
 -17   4  -2    2.93    0.86
  17  -4   2    2.57    1.14
 -17   5  -2    1.72    0.87
  18   4   2    0.73    1.09
  18   3   2    3.39    1.16
  18   2   2    6.62    1.20
  18   1   2    2.52    1.00
  18   0   2    1.29    0.96
 -18   1  -2    2.43    0.77
  18  -1   2    3.77    0.98
 -18   2  -2    3.99    0.90
  18  -2   2    5.64    1.08
 -18   3  -2    2.98    0.87
  18  -3   2    2.43    1.14
 -18   4  -2    0.67    0.87
  18  -4   2    1.11    1.14
 -18   5  -2    1.29    0.91
  19   4   2    2.55    1.22
  19   3   2    1.29    1.17
  19   2   2    1.11    1.10
  19   1   2    6.23    1.18
  19   0   2    3.83    1.09
 -19   1  -2    4.43    0.89
  19  -1   2    7.41    1.14
 -19   2  -2    0.43    0.85
  19  -2   2    2.25    1.05
 -19   3  -2    3.44    0.94
  19  -3   2    3.61    1.18
 -19   4  -2    1.49    0.92
 -19   5  -2    0.31    0.93
  20   3   2    3.96    1.29
  20   2   2    2.43    1.13
  20   1   2    7.24    1.29
  20   0   2   11.31    1.47
 -20   1  -2    4.91    0.97
  20  -1   2    8.97    1.24
 -20   2  -2    3.07    0.95
  20  -2   2    4.27    1.14
 -20   3  -2    0.28    0.90
  20  -3   2    4.95    1.24
 -20   4  -2    0.80    0.93
  21   3   2    2.41    1.30
  21   2   2    1.90    1.17
  21   1   2    0.86    1.14
  21   0   2    6.36    1.28
 -21   1  -2    1.44    0.82
  21  -1   2   -0.04    1.09
 -21   2  -2    2.21    0.93
  21  -2   2    2.04    1.20
 -21   3  -2   -0.91    0.91
  22   2   2    1.14    1.17
  22   1   2    2.50    1.21
  22   0   2    1.41    1.17
  22  -1   2    2.10    1.18
 -22   2  -2    2.55    0.94
  22  -2   2    3.43    1.25
 -22   2   3    1.68    0.95
  22  -1  -3    3.08    1.12
 -22   1   3    0.19    0.88
  22   0  -3    1.69    1.07
  22   1  -3    2.25    1.13
  22   2  -3    2.22    1.16
 -21   3   3   -1.05    0.90
 -21   2   3    4.60    1.04
  21  -1  -3    6.91    1.16
 -21   1   3    3.67    0.95
  21   0  -3    5.94    1.17
  21   1  -3    5.08    1.18
  21   2  -3    4.90    1.20
  21   3  -3    0.28    1.22
 -20   4   3    0.41    0.94
 -20   3   3    1.50    0.92
 -20   2   3    1.81    0.93
  20  -1  -3    4.28    1.08
 -20   1   3    3.93    0.92
  20   0  -3    1.78    1.02
  20   1  -3    2.55    1.07
  20   2  -3    1.98    1.12
  20   3  -3    1.68    1.20
  20   4  -3    1.45    1.18
 -19   4   3    1.61    0.91
 -19   3   3    6.92    1.07
  19  -2  -3    5.17    1.11
 -19   2   3    4.20    0.97
  19  -1  -3    6.63    1.07
 -19   1   3    5.41    0.95
  19   0  -3    6.86    1.09
  19   1  -3    8.75    1.22
  19   2  -3    4.42    1.16
  19   3  -3   10.05    1.40
  19   4  -3    1.51    1.13
 -18   5   3    0.55    0.90
 -18   4   3    2.17    0.88
 -18   3   3    2.09    0.84
  18  -2  -3    3.18    0.99
 -18   2   3    2.54    0.85
  18  -1  -3    2.86    0.89
 -18   1   3    0.79    0.77
  18   0  -3    4.62    0.97
  18   1  -3    2.50    0.94
  18   2  -3    2.89    1.03
  18   3  -3    2.17    1.08
  18   4  -3    0.76    1.10
  18   5  -3    0.53    1.12
 -18  -5   3    1.41    1.00
 -17   5   3    2.00    0.88
 -17   4   3    3.41    0.87
 -17   3   3    1.50    0.80
  17  -2  -3    7.79    1.00
 -17   2   3    3.55    0.87
  17  -1  -3    7.68    0.98
 -17   1   3    5.66    0.92
  17   0  -3   12.89    1.28
 -17   0   3   12.43    1.26
  17   1  -3    8.02    1.05
  17   2  -3    5.15    1.03
  17   3  -3    2.53    1.02
  17   4  -3    6.76    1.22
  17   5  -3    0.10    1.06
 -17  -5   3    1.55    0.97
 -17  -6   3    2.70    1.05
 -16   6   3    3.03    0.90
 -16   5   3    3.06    0.87
 -16   4   3    3.02    0.83
 -16   3   3    4.88    0.86
  16  -2  -3    0.47    0.81
 -16   2   3    0.83    0.70
  16  -1  -3   13.25    1.52
  16  -1  -3   14.86    1.24
 -16   1   3   14.75    1.39
  16   0  -3    4.30    0.86
  16   0  -3    0.28    1.17
 -16   0   3    4.13    0.72
  16   1  -3   18.19    1.46
  16   1  -3   16.30    1.94
  16   2  -3   -1.79    1.39
  16   2  -3    1.79    0.88
  16   3  -3    3.92    1.01
  16   4  -3    2.00    1.00
 -16  -4   3    2.62    0.91
  16   5  -3    3.06    1.09
 -16  -5   3    3.61    0.98
  16   6  -3    2.61    1.12
 -15   6   3    3.85    0.89
 -15   5   3    2.67    0.79
 -15   4   3    4.16    0.80
  15  -3  -3   13.16    1.20
 -15   3   3   11.28    1.19
  15  -2  -3   10.96    1.11
 -15   2   3   11.37    1.17
  15  -1  -3    1.05    0.87
  15  -1  -3    1.47    0.68
  15  -1  -3    0.77    0.57
 -15   1   3    2.06    0.69
  15   0  -3    7.87    0.91
  15   0  -3    4.52    1.20
 -15   0   3    7.22    0.86
  15   1  -3   -0.40    1.14
  15   1  -3    1.01    0.72
  15   2  -3   12.44    1.67
  15   2  -3   11.70    1.20
  15   3  -3   15.52    2.07
  15   3  -3   15.19    1.39
  15   4  -3    4.33    1.00
 -15  -4   3    1.72    0.84
  15   5  -3    1.00    1.00
 -15  -5   3    3.68    0.98
  15   6  -3    2.08    1.09
 -15  -6   3    0.40    1.01
  15   7  -3    1.96    1.20
 -15  -7   3    2.11    1.10
 -14   6   3    3.78    0.81
 -14   5   3    1.93    0.74
 -14   4   3    4.88    0.79
  14  -3  -3    6.37    0.95
 -14   3   3    6.98    0.83
  14  -2  -3    9.95    1.02
 -14   2   3   11.40    1.09
  14  -1  -3    2.74    0.62
  14  -1  -3    4.48    0.74
  14  -1  -3    3.86    0.89
 -14   1   3    3.94    0.71
  14   0  -3   20.54    1.91
  14   0  -3   24.26    1.62
 -14   0   3   21.13    1.73
  14   1  -3    5.19    0.81
  14   1  -3    4.13    1.19
  14   2  -3   10.18    1.12
  14   2  -3   10.47    1.59
  14   2  -3   10.77    1.08
  14   3  -3    6.70    0.96
  14   3  -3    5.53    1.58
 -14  -3   3    5.92    0.87
  14   4  -3    3.55    0.93
 -14  -4   3    4.85    0.87
  14   5  -3    0.69    0.96
 -14  -5   3    2.21    0.89
  14   6  -3    0.45    1.04
 -14  -6   3    1.52    0.96
  14   7  -3    1.14    1.15
 -13   6   3    4.96    0.85
 -13   5   3    3.42    0.73
  13  -4  -3    8.48    1.09
 -13   4   3    9.54    0.95
  13  -3  -3    3.88    0.78
 -13   3   3    3.09    0.65
  13  -2  -3   33.64    2.23
 -13   2   3   33.22    2.42
  13  -1  -3    6.88    0.77
 -13   1   3    5.48    0.77
  13   0  -3   48.77    3.56
  13   0  -3   52.87    3.19
  13   0  -3   51.00    3.66
  13   0  -3   47.72    3.50
 -13   0   3   49.59    3.49
  13   1  -3    8.59    0.89
  13   1  -3    6.43    0.86
  13   1  -3    6.02    1.21
  13   2  -3   36.53    2.47
  13   2  -3   39.71    2.99
  13   2  -3   36.15    2.67
  13   3  -3    3.63    0.79
  13   3  -3    0.87    1.36
 -13  -3   3    2.18    0.70
  13   4  -3    8.16    1.76
  13   4  -3    8.40    1.06
 -13  -4   3    8.50    1.03
  13   5  -3    2.95    0.94
 -13  -5   3    2.01    0.87
 -13  -6   3    4.17    1.03
  13   7  -3    1.25    1.08
 -12   5   3    5.00    0.75
  12  -4  -3    6.79    0.96
 -12   4   3    7.64    0.85
  12  -3  -3    8.76    0.94
 -12   3   3    9.11    0.91
  12  -2  -3    3.33    0.67
 -12   2   3    2.69    0.59
  12  -1  -3   19.56    1.34
  12  -1  -3   17.64    1.40
 -12   1   3   19.22    1.37
 -12   1   3   17.93    1.46
  12   0  -3    1.47    0.56
  12   0  -3    1.28    0.84
  12   0  -3    0.31    0.44
  12   0  -3    0.92    0.55
 -12   0   3    2.00    0.53
 -12   0   3    2.36    0.58
  12   1  -3   21.38    2.05
  12   1  -3   23.32    1.82
  12   1  -3   25.14    1.66
  12   2  -3    2.75    0.70
  12   2  -3    2.39    1.16
  12   2  -3    2.13    0.56
  12   3  -3    8.40    0.92
  12   3  -3    6.83    1.48
 -12  -3   3    6.46    0.84
  12   4  -3    5.69    1.63
  12   4  -3    6.72    0.92
 -12  -4   3    6.04    0.88
  12   5  -3    4.92    0.99
 -12  -5   3    4.85    0.91
  12   6  -3    3.06    1.01
 -12  -6   3    3.38    0.94
  12   7  -3    1.79    1.10
 -12  -7   3    4.18    1.07
  11  -5  -3    4.64    0.93
  11  -4  -3   10.40    1.02
 -11   4   3    8.69    0.86
  11  -3  -3   10.64    0.97
 -11   3   3   10.53    0.95
  11  -2  -3   13.45    1.07
 -11   2   3   13.54    1.06
 -11   2   3   13.27    1.10
  11  -1  -3   17.11    1.30
  11  -1  -3   17.49    1.24
 -11   1   3   16.66    1.24
 -11   1   3   17.45    1.36
  11   0  -3   28.18    2.05
  11   0  -3   29.92    1.90
  11   0  -3   28.40    2.23
  11   0  -3   28.37    2.14
 -11   0   3   27.04    1.88
 -11   0   3   28.28    2.08
 -11   0   3   30.35    2.15
  11   1  -3   19.94    1.80
  11   1  -3   19.95    1.42
  11   1  -3   18.62    1.41
  11   1  -3   21.05    1.57
 -11  -1   3   19.45    1.39
  11   2  -3   12.84    1.09
  11   2  -3   13.48    1.52
 -11  -2   3   11.63    1.02
  11   3  -3   11.70    1.10
  11   3  -3   16.13    1.74
 -11  -3   3   11.90    1.09
  11   4  -3   10.23    1.78
  11   4  -3    9.89    1.05
 -11  -4   3    8.42    0.96
  11   5  -3    5.60    0.94
  11   5  -3    7.33    1.85
 -11  -5   3    4.39    0.88
  11   6  -3    4.28    1.05
 -11  -6   3    4.57    1.00
  11   7  -3    4.16    1.15
 -11  -7   3    2.71    0.98
  11   8  -3    1.99    1.21
 -11  -8   3    2.95    1.08
  10  -5  -3    3.82    0.85
  10  -4  -3    8.20    0.93
 -10   4   3    7.91    0.79
  10  -3  -3   15.07    1.22
 -10   3   3   16.71    1.24
  10  -2  -3   11.92    0.96
 -10   2   3   11.59    0.99
 -10   2   3   11.63    0.94
  10   0  -3   65.15    4.64
  10   0  -3   70.67    4.13
  10   0  -3   65.35    4.69
  10   0  -3   65.68    4.54
 -10   0   3   62.86    4.12
 -10   0   3   71.53    4.66
 -10   0   3   64.27    4.54
  10   1  -3    6.06    0.64
  10   1  -3    4.22    0.63
  10   1  -3    2.26    0.99
  10   1  -3    3.15    0.81
 -10  -1   3    4.10    0.58
 -10  -1   3    3.84    0.91
  10   2  -3   11.71    1.01
  10   2  -3   11.42    1.42
 -10  -2   3   11.43    0.96
  10   3  -3   16.29    1.74
  10   3  -3   13.58    1.15
 -10  -3   3   13.32    1.13
  10   4  -3    7.16    1.57
  10   4  -3    9.12    0.96
 -10  -4   3    7.39    0.89
  10   5  -3    2.83    1.60
  10   5  -3    0.87    0.83
 -10  -5   3    1.72    0.75
  10   6  -3    1.55    0.98
  10   6  -3    3.05    1.76
 -10  -6   3    3.21    0.86
 -10  -7   3    2.70    0.95
  10   8  -3    2.26    1.18
 -10  -8   3    2.32    1.07
   9  -5  -3    4.42    0.86
   9  -4  -3    9.35    0.93
   9  -3  -3    8.78    0.80
  -9   3   3    7.43    0.76
  -9   3   3    7.68    0.74
   9  -2  -3   42.10    2.54
  -9   2   3   39.56    2.52
  -9   2   3   38.55    2.77
   9  -1  -3    2.60    0.44
   9  -1  -3    3.08    0.53
  -9   1   3    2.93    0.50
  -9   1   3    3.56    0.53
   9   0  -3   84.18    4.91
   9   0  -3   79.63    5.41
   9   0  -3   77.59    5.57
   9   0  -3   75.54    5.52
  -9   0   3   83.34    5.55
  -9   0   3   78.26    4.91
  -9   0   3   79.61    5.42
   9   1  -3    3.81    0.98
   9   1  -3    3.21    0.58
   9   1  -3    3.96    0.59
   9   1  -3    2.69    0.57
   9   1  -3    2.55    0.79
  -9  -1   3    4.44    0.86
  -9  -1   3    3.17    0.53
   9   2  -3   42.17    2.90
   9   2  -3   47.41    3.46
   9   2  -3   41.42    2.91
  -9  -2   3   49.52    2.90
  -9  -2   3   48.69    2.92
   9   3  -3    8.22    0.87
   9   3  -3    8.83    1.38
  -9  -3   3    8.60    0.83
   9   4  -3   11.54    1.09
   9   4  -3   12.74    1.80
  -9  -4   3   11.64    1.08
   9   5  -3    6.08    0.88
   9   5  -3    3.94    1.53
  -9  -5   3    4.57    0.80
   9   6  -3    8.73    1.11
   9   6  -3    9.00    1.82
  -9  -6   3    7.02    1.00
   9   7  -3    3.19    1.04
  -9  -7   3    2.34    0.93
   9   8  -3    2.61    1.15
  -9  -8   3    1.78    1.00
  -8   7   3    2.39    0.80
   8  -6  -3    2.07    0.88
  -8   6   3    2.67    0.66
   8  -5  -3    7.01    0.90
  -8   5   3    6.24    0.77
   8  -4  -3   11.36    1.02
   8  -3  -3    5.09    0.66
  -8   3   3    5.54    0.63
   8  -2  -3    9.85    0.83
  -8   2   3   10.61    0.84
  -8   2   3    9.31    0.81
   8  -1  -3    8.83    0.77
   8  -1  -3    8.12    0.74
  -8   1   3    9.34    0.76
  -8   1   3    9.28    0.82
   8   0  -3   23.56    1.72
   8   0  -3   21.27    1.80
   8   0  -3   23.91    1.88
   8   0  -3   26.07    1.58
  -8   0   3   24.96    1.84
  -8   0   3   23.25    1.57
  -8   0   3   24.13    1.74
   8   1  -3   10.17    0.87
   8   1  -3    9.30    0.91
   8   1  -3   11.07    1.22
   8   1  -3    9.88    0.87
  -8  -1   3   10.46    0.85
  -8  -1   3   11.52    1.19
   8   2  -3    9.14    1.25
   8   2  -3    7.57    0.79
   8   2  -3    7.31    0.81
  -8  -2   3    8.72    0.79
  -8  -2   3    8.96    0.81
   8   3  -3    4.95    1.21
   8   3  -3    5.84    0.72
  -8  -3   3    5.00    0.69
   8   4  -3   10.79    1.55
   8   4  -3    9.88    0.99
  -8  -4   3    9.33    0.97
   8   5  -3    8.97    0.93
   8   5  -3    6.10    1.51
  -8  -5   3    5.87    0.85
   8   6  -3    2.56    1.51
   8   6  -3    3.64    0.94
  -8  -6   3    2.48    0.80
   8   7  -3    0.65    0.99
  -8  -7   3    1.94    0.92
   8   8  -3    2.73    1.12
  -8  -8   3    2.16    1.00
  -7   7   3    0.83    0.85
   7  -6  -3    2.28    0.86
  -7   6   3    1.68    0.70
   7  -5  -3    2.78    0.82
   7  -5  -3    5.66    0.85
  -7   5   3    3.64    0.64
   7  -4  -3   12.09    1.02
   7  -3  -3    3.33    0.60
  -7   3   3    3.80    0.54
   7  -2  -3   20.90    1.33
  -7   2   3   18.70    1.40
  -7   2   3   19.46    1.31
   7  -1  -3   17.22    1.34
   7  -1  -3   17.89    1.45
  -7   1   3   24.44    1.36
  -7   1   3   23.12    1.49
   7   0  -3   27.04    2.07
   7   0  -3   27.68    2.12
   7   0  -3   29.39    1.81
   7   0  -3   29.76    2.00
  -7   0   3   29.65    2.01
  -7   0   3   27.03    1.81
  -7   0   3   27.74    2.10
   7   1  -3   16.45    1.17
   7   1  -3   12.23    1.49
   7   1  -3   15.02    1.10
   7   1  -3   15.28    1.11
  -7  -1   3   15.52    1.09
  -7  -1   3   13.47    1.42
  -7  -1   3   16.30    1.08
   7   2  -3   24.87    2.04
   7   2  -3   21.52    1.57
   7   2  -3   20.95    1.57
  -7  -2   3   24.88    1.56
  -7  -2   3   24.68    1.57
   7   3  -3    4.33    0.74
   7   3  -3    4.00    1.21
   7   3  -3    4.07    0.63
  -7  -3   3    3.34    0.57
   7   4  -3   14.18    1.20
   7   4  -3   18.67    1.75
  -7  -4   3   14.44    1.18
   7   5  -3    5.15    0.81
   7   5  -3    5.99    1.37
  -7  -5   3    5.16    0.79
   7   6  -3    4.94    0.90
   7   6  -3    4.14    1.54
  -7  -6   3    2.79    0.87
   7   7  -3    0.72    0.97
  -7  -7   3    1.57    0.92
   7   8  -3    1.15    1.08
  -7  -8   3    0.90    1.03
   6  -6  -3    0.52    0.78
  -6   6   3    1.98    0.76
   6  -5  -3    3.63    0.87
   6  -5  -3    5.88    0.80
  -6   5   3    4.88    0.74
   6  -4  -3    2.58    0.60
  -6   4   3    2.75    0.52
   6  -3  -3    9.86    0.82
  -6   3   3    9.54    0.82
   6  -2  -3   19.13    1.38
  -6   2   3   22.44    1.37
   6  -1  -3    8.90    0.68
   6   0  -3    2.11    0.37
   6   0  -3    2.63    0.38
   6   0  -3    4.09    0.58
  -6   0   3    2.17    0.39
  -6   0   3    2.01    0.52
  -6   0   3    2.90    0.37
   6   1  -3    6.63    0.66
   6   1  -3    7.11    0.66
   6   1  -3    6.41    0.95
  -6  -1   3    8.28    0.64
  -6  -1   3    7.55    0.64
  -6  -1   3    6.80    0.90
   6   2  -3   13.56    1.60
   6   2  -3   17.65    1.18
   6   2  -3   16.84    1.19
   6   2  -3   16.23    1.38
  -6  -2   3   14.14    1.52
  -6  -2   3   16.46    1.18
  -6  -2   3   18.81    1.18
   6   3  -3    9.57    0.91
   6   3  -3    9.16    1.34
   6   3  -3   10.46    1.02
   6   3  -3    8.48    0.83
  -6  -3   3    9.65    0.83
   6   4  -3    4.49    1.15
   6   4  -3    5.84    0.80
   6   4  -3    4.51    0.69
  -6  -4   3    5.46    0.70
  -6  -4   3    4.40    0.71
   6   5  -3    7.43    0.92
   6   5  -3    7.35    1.35
  -6  -5   3    7.30    0.88
   6   6  -3    2.02    0.87
  -6  -6   3    3.26    0.81
  -6  -7   3    4.35    1.03
   6   8  -3    1.41    1.12
  -6  -8   3    1.64    1.05
  -5   7   3    1.14    0.96
   5  -6  -3    5.82    0.90
  -5   6   3    4.55    0.94
   5  -5  -3    5.56    0.80
  -5   5   3    4.29    0.79
   5  -4  -3    9.21    1.04
   5  -4  -3   11.41    0.91
  -5   4   3    8.31    0.91
   5  -3  -3   13.05    0.95
  -5   3   3   11.47    0.93
   5  -2  -3    5.87    0.59
  -5   2   3    6.29    0.56
   5  -1  -3   37.80    2.16
  -5   1   3   33.93    2.15
  -5   1   3   33.01    2.37
   5   0  -3    1.05    0.26
   5   0  -3    1.05    0.40
   5   0  -3    0.66    0.27
  -5   0   3    0.95    0.23
  -5   0   3    0.99    0.27
  -5   0   3    0.50    0.39
   5   1  -3   38.54    2.59
   5   1  -3   45.64    3.02
   5   1  -3   38.77    2.59
  -5  -1   3   43.52    2.99
  -5  -1   3   43.28    2.60
  -5  -1   3   43.04    2.59
   5   2  -3    6.87    0.79
   5   2  -3    4.07    1.04
   5   2  -3    6.95    0.65
   5   2  -3    5.84    0.64
  -5  -2   3    4.99    0.94
  -5  -2   3    7.51    0.63
   5   3  -3   11.12    1.15
   5   3  -3   13.33    1.41
   5   3  -3   10.45    0.92
   5   3  -3   10.31    0.93
  -5  -3   3   12.13    0.93
  -5  -3   3   11.87    1.04
   5   4  -3   11.15    1.17
   5   4  -3   12.27    1.44
   5   4  -3   12.16    1.01
  -5  -4   3   12.91    1.16
  -5  -4   3   12.09    1.00
   5   5  -3    5.79    1.29
  -5  -5   3    5.77    0.80
   5   6  -3    5.38    1.48
  -5  -6   3    4.96    0.88
   5   7  -3    1.76    1.68
  -5  -7   3    2.48    0.86
   5   8  -3    4.22    1.10
  -5  -8   3    1.76    0.96
   4  -6  -3    2.44    0.84
  -4   6   3    2.88    0.92
   4  -5  -3    0.63    0.56
   4  -5  -3    0.59    0.63
  -4   5   3    1.86    0.76
   4  -4  -3    8.05    0.79
   4  -4  -3    5.81    0.89
  -4   4   3    7.12    0.84
   4  -3  -3    2.85    0.64
   4  -3  -3    3.45    0.55
  -4   3   3    3.29    0.58
  -4   3   3    3.95    0.54
   4  -2  -3   32.71    2.15
  -4   2   3   36.11    2.15
   4  -1  -3    7.13    0.52
  -4   1   3    8.02    0.52
   4   0  -3   10.76    0.76
   4   0  -3   12.20    0.85
   4   0  -3   12.74    0.88
  -4   0   3   12.07    0.85
  -4   0   3   10.33    0.75
  -4   0   3   12.17    0.88
   4   1  -3    7.84    0.77
   4   1  -3    7.36    0.57
   4   1  -3    7.71    0.57
  -4  -1   3    7.55    0.55
  -4  -1   3    7.59    0.74
  -4  -1   3    8.11    0.56
   4   2  -3   30.28    2.04
   4   2  -3   32.34    2.39
   4   2  -3   28.48    2.43
   4   2  -3   32.95    2.03
  -4  -2   3   33.64    2.37
  -4  -2   3   29.62    2.39
  -4  -2   3   35.22    2.03
   4   3  -3    3.99    0.62
   4   3  -3    4.09    0.66
   4   3  -3    3.99    0.97
  -4  -3   3    5.32    0.60
  -4  -3   3    3.98    0.63
   4   4  -3    6.09    0.81
   4   4  -3    6.14    1.11
  -4  -4   3    5.97    0.77
  -4  -4   3    6.84    0.73
   4   5  -3    1.63    1.12
   4   5  -3    2.33    0.76
  -4  -5   3    1.38    0.63
  -4  -5   3    1.08    0.66
   4   6  -3    3.17    1.35
  -4  -6   3    2.64    0.78
   4   7  -3    2.05    1.68
  -4  -7   3    2.27    0.87
  -4  -8   3    1.81    1.00
   3  -7  -3    0.77    0.85
  -3   7   3   -0.46    1.11
   3  -6  -3    2.74    0.79
  -3   6   3    2.99    1.02
   3  -5  -3    2.16    0.59
   3  -5  -3    3.05    0.72
  -3   5   3    3.63    0.88
   3  -4  -3    2.68    0.58
   3  -4  -3    2.29    0.55
   3  -4  -3    2.42    0.77
  -3   4   3    3.61    0.74
   3  -3  -3    5.91    0.80
   3  -3  -3    5.91    0.66
  -3   3   3    7.25    0.81
  -3   3   3    6.07    0.65
   3  -2  -3   14.69    1.08
  -3   2   3   17.72    1.07
   3  -1  -3   25.70    1.55
  -3   1   3   24.84    1.55
   3   0  -3    9.45    0.60
   3   0  -3    7.40    0.59
  -3   0   3    8.52    0.59
  -3   0   3    6.58    0.58
   3   1  -3   24.81    1.75
   3   1  -3   22.52    1.73
   3   1  -3   23.72    1.49
   3   1  -3   23.12    1.49
  -3  -1   3   26.82    1.49
  -3  -1   3   22.31    1.72
   3   2  -3   16.02    1.11
   3   2  -3   17.81    1.29
   3   2  -3   14.43    1.40
  -3  -2   3   14.08    1.38
  -3  -2   3   17.40    1.11
  -3  -2   3   16.81    1.27
   3   3  -3    4.94    0.61
   3   3  -3    4.09    0.95
   3   3  -3    5.00    0.66
  -3  -3   3    5.46    0.66
  -3  -3   3    4.73    0.60
   3   4  -3    3.85    1.01
   3   4  -3    2.53    0.68
  -3  -4   3    3.38    0.64
  -3  -4   3    3.29    0.61
   3   5  -3    3.17    0.79
   3   5  -3    5.13    1.17
  -3  -5   3    2.36    0.67
  -3  -5   3    3.46    0.71
   3   6  -3    4.55    1.35
  -3  -6   3    3.26    0.82
  -3  -7   3   -0.03    0.85
  -3  -8   3    2.80    1.02
   2  -7  -3    0.44    0.83
  -2   7   3    1.72    1.23
   2  -6  -3   -0.34    0.68
  -2   6   3    0.97    1.01
   2  -5  -3    4.52    0.72
   2  -5  -3    4.43    0.73
  -2   5   3    5.11    0.97
   2  -4  -3    0.25    0.46
   2  -4  -3    0.56    0.57
   2  -4  -3    0.63    0.74
  -2   4   3    0.66    0.78
   2  -3  -3    4.90    0.80
   2  -3  -3    4.91    0.63
   2  -3  -3    5.09    0.61
  -2   3   3    6.35    0.63
   2  -2  -3    8.22    0.72
   2  -2  -3    9.39    0.90
  -2   2   3   12.23    0.90
  -2   2   3   11.07    0.73
   2  -1  -3    2.31    0.21
  -2   1   3    1.84    0.19
   2   0  -3    1.48    0.16
   2   0  -3    1.76    0.18
   2   0  -3    1.82    0.16
  -2   0   3    1.43    0.16
   2   1  -3    2.33    0.28
   2   1  -3    2.80    0.26
   2   1  -3    2.46    0.35
  -2  -1   3    2.28    0.34
  -2  -1   3    2.93    0.28
  -2  -1   3    3.16    0.25
   2   2  -3    8.16    0.97
   2   2  -3    9.84    0.76
   2   2  -3   10.62    0.84
  -2  -2   3   11.51    0.84
  -2  -2   3    7.86    0.95
  -2  -2   3   10.92    0.75
   2   3  -3    6.21    0.67
   2   3  -3    5.49    0.70
   2   3  -3    5.07    0.99
  -2  -3   3    6.63    0.74
  -2  -3   3    6.47    0.64
  -2  -3   3    5.65    0.90
   2   4  -3    1.70    0.94
   2   4  -3    0.83    0.61
  -2  -4   3    1.12    0.52
  -2  -4   3    0.91    0.56
   2   5  -3    6.17    1.17
  -2  -5   3    3.60    0.65
  -2  -5   3    3.57    0.74
   2   6  -3    0.60    1.16
  -2  -6   3   -0.14    0.64
  -2  -7   3    1.61    0.77
  -2  -8   3    2.88    1.02
  -1   7   3    2.96    1.30
   1  -6  -3    3.04    0.80
  -1   6   3    4.33    1.15
   1  -5  -3    2.27    0.67
   1  -5  -3    2.35    0.66
  -1   5   3    3.80    0.96
   1  -4  -3    1.57    0.79
   1  -4  -3    0.72    0.53
   1  -4  -3    1.03    0.51
  -1   4   3    3.87    0.93
   1  -3  -3    2.33    0.50
   1  -3  -3    2.09    0.49
   1  -3  -3    2.44    0.74
  -1   3   3    2.38    0.49
  -1   3   3    2.91    0.81
   1  -2  -3   14.84    1.11
   1  -2  -3   14.01    1.33
   1  -2  -3   16.90    1.30
  -1   2   3   18.85    1.34
  -1   2   3   16.58    1.34
  -1   2   3   19.08    1.10
  -1   1   3    2.84    0.28
  -1   1   3    3.35    0.24
   1   0  -3    6.12    0.44
   1   1  -3    6.88    0.54
   1   1  -3    8.04    0.58
   1   1  -3    7.72    0.49
   1   1  -3    7.86    0.56
  -1  -1   3    7.18    0.48
  -1  -1   3    7.11    0.57
  -1  -1   3    6.52    0.55
   1   2  -3   21.56    1.45
   1   2  -3   24.70    1.69
   1   2  -3   22.21    1.69
  -1  -2   3   22.98    1.45
  -1  -2   3   21.29    1.68
  -1  -2   3   22.39    1.69
   1   3  -3    3.86    0.58
   1   3  -3    3.84    0.83
  -1  -3   3    3.73    0.55
  -1  -3   3    3.46    0.56
  -1  -3   3    4.51    0.76
   1   4  -3    0.54    0.86
  -1  -4   3    1.40    0.55
  -1  -4   3    2.54    0.59
   1   5  -3    2.51    0.98
  -1  -5   3    2.99    0.64
  -1  -5   3    2.01    0.63
   1   6  -3    5.34    1.20
  -1  -6   3    4.76    0.78
  -1  -7   3    1.49    0.79
  -1  -8   3    1.50    0.89
   0  -7  -3    2.81    0.96
   0  -6  -3    1.95    0.80
   0   6   3    1.46    1.12
   0  -5  -3    0.62    0.62
   0  -5  -3    0.58    0.61
   0   5   3   -0.39    1.06
   0  -4  -3    2.04    0.58
   0  -4  -3    0.67    0.54
   0   4   3    1.73    0.61
   0   4   3    1.96    0.93
   0  -3  -3    0.65    0.77
   0  -3  -3    2.89    0.57
   0  -3  -3    2.58    0.54
   0   3   3    4.47    0.58
   0   3   3    3.49    0.87
   0   3   3    3.56    0.50
   0   2   3   34.00    2.66
   0   2   3   40.02    2.72
   0  -1  -3    1.97    0.19
   0  -1  -3    1.61    0.17
   0  -1  -3    1.70    0.20
   0  -1  -3    1.36    0.23
   0   1   3    0.99    0.15
   0   0  -3    0.07    0.06
   0   0  -3    0.06    0.07
   0   0   3   -0.10    0.04
   0   0   3   -0.07    0.03
   0   1  -3    2.51    0.22
   0   1  -3    2.10    0.26
   0  -1   3    1.91    0.24
   0  -1   3    2.48    0.22
   0  -1   3    1.48    0.20
   0   2  -3   35.85    2.29
   0   2  -3   40.57    2.61
   0  -2   3   34.38    2.59
   0  -2   3   36.14    2.28
   0   4  -3    0.62    0.81
   0  -4   3    2.01    0.50
   0  -4   3    0.62    0.54
   0   5  -3    1.24    0.89
   0  -5   3    1.74    0.58
   0  -5   3    1.17    0.59
   0   6  -3    2.74    1.11
   0  -6   3    2.58    0.76
   0  -7   3    2.30    0.80
   0  -8   3    1.48    0.88
  -1  -7  -3    2.91    0.94
   1   7   3    1.07    1.32
  -1  -6  -3    4.71    0.85
   1   6   3    5.94    1.36
  -1  -5  -3    2.16    0.64
  -1  -5  -3    2.97    0.68
   1   5   3    2.23    0.73
   1   5   3    2.98    1.15
  -1  -4  -3    0.73    0.56
  -1  -4  -3    2.47    0.58
   1   4   3    2.32    0.63
   1   4   3    6.03    1.04
  -1  -3  -3    3.56    0.85
  -1  -3  -3    3.74    0.60
  -1  -3  -3    4.52    0.58
   1   3   3    4.68    0.98
   1   3   3    5.26    0.61
   1   3   3    4.43    0.55
  -1  -2  -3   18.57    1.57
  -1  -2  -3   18.37    1.34
  -1  -2  -3   18.23    1.64
   1   2   3   20.11    1.63
   1   2   3   24.36    1.35
   1   2   3   21.03    1.62
   1   2   3   22.10    1.35
   1   2   3   23.69    1.59
  -1  -1  -3    6.93    0.50
  -1  -1  -3    7.00    0.59
  -1  -1  -3    6.93    0.50
   1   1   3    6.83    0.58
   1   1   3    7.08    0.49
   1   1   3    7.58    0.57
   1   1   3    8.76    0.59
   1   1   3    6.88    0.49
  -1   0  -3    2.55    0.21
  -1   1  -3    9.01    0.60
  -1   1  -3    7.98    0.56
  -1   1  -3    8.80    0.63
   1  -1   3    8.08    0.63
   1  -1   3    8.42    0.60
   1  -1   3    8.38    0.56
  -1   2  -3   26.27    1.74
  -1   2  -3   26.34    1.65
  -1   2  -3   23.64    1.53
   1  -2   3   20.57    1.52
   1  -2   3   22.36    1.73
  -1   3  -3    4.01    0.73
  -1   3  -3    3.92    0.55
   1  -3   3    3.87    0.57
   1  -3   3    3.85    0.71
  -1   4  -3   -0.50    0.74
   1  -4   3    0.68    0.56
   1  -4   3    1.25    0.51
  -1   5  -3    2.56    0.88
   1  -5   3    2.97    0.64
   1  -5   3    2.93    0.59
  -1   6  -3    3.02    1.06
   1  -6   3    2.75    0.69
   1  -7   3    1.17    0.83
   1  -8   3    2.97    0.94
  -2  -7  -3    1.95    0.90
  -2  -6  -3    0.76    0.72
   2   6   3    1.55    1.41
  -2  -5  -3    4.10    0.73
  -2  -5  -3    4.04    0.76
   2   5   3    4.59    0.81
  -2  -4  -3    1.45    0.58
  -2  -4  -3    0.57    0.52
   2   4   3    1.48    0.59
   2   4   3    2.25    1.03
   2   4   3    0.94    0.58
  -2  -3  -3    5.89    0.74
  -2  -3  -3    7.40    0.75
  -2  -3  -3    4.87    0.99
   2   3   3    6.75    0.68
   2   3   3    8.63    1.11
   2   3   3    6.53    0.79
   2   3   3    6.12    1.02
   2   3   3    8.83    0.75
  -2  -2  -3   12.66    0.86
  -2  -2  -3   10.49    1.15
  -2  -2  -3   10.56    0.98
  -2  -2  -3   11.24    0.86
   2   2   3   13.63    1.00
   2   2   3   12.27    0.84
   2   2   3   10.64    1.09
   2   2   3   12.86    0.85
   2   2   3   12.63    1.14
  -2  -1  -3    2.24    0.28
  -2  -1  -3    2.34    0.26
  -2  -1  -3    1.91    0.32
   2   1   3    1.93    0.31
   2   1   3    1.84    0.31
   2   1   3    2.45    0.26
   2   1   3    2.30    0.26
  -2   0  -3    1.66    0.19
  -2   0  -3    1.73    0.19
   2   0   3    1.72    0.20
  -2   1  -3    2.74    0.26
  -2   1  -3    2.49    0.25
  -2   1  -3    2.82    0.27
   2  -1   3    2.37    0.25
   2  -1   3    2.20    0.24
   2  -1   3    2.63    0.28
  -2   2  -3   12.09    0.84
  -2   2  -3   12.17    0.87
  -2   2  -3   11.41    0.94
   2  -2   3   10.85    0.94
   2  -2   3   11.84    0.84
  -2   3  -3    6.46    0.66
  -2   3  -3    5.72    0.76
   2  -3   3    6.33    0.65
   2  -3   3    5.61    0.79
  -2   4  -3    0.15    0.69
   2  -4   3    0.30    0.54
  -2   5  -3    4.15    0.90
   2  -5   3    4.22    0.70
   2  -5   3    3.87    0.66
  -2   6  -3   -0.14    0.98
   2  -6   3   -0.54    0.63
   2  -7   3    2.08    0.81
  -3  -8  -3    3.71    1.11
   3   8   3    2.55    1.62
   3   7   3    3.75    1.60
   3   7   3    2.99    1.03
  -3  -6  -3    4.36    0.87
   3   6   3    4.10    1.45
   3   6   3    4.33    0.87
  -3  -5  -3    4.26    0.75
  -3  -5  -3    3.29    0.72
   3   5   3    3.06    0.75
   3   5   3    4.57    1.21
   3   5   3    3.40    0.76
  -3  -4  -3    2.39    0.64
  -3  -4  -3    3.02    0.63
   3   4   3    2.30    1.10
   3   4   3    2.79    0.65
   3   4   3    4.31    0.70
  -3  -3  -3    4.37    0.66
  -3  -3  -3    4.82    0.63
   3   3   3    7.95    1.09
   3   3   3    5.39    0.73
   3   3   3    5.50    1.02
   3   3   3    5.01    0.61
   3   3   3    6.03    0.64
  -3  -2  -3   16.28    1.10
  -3  -2  -3   12.08    1.38
  -3  -2  -3   12.46    1.37
  -3  -2  -3   14.11    1.08
   3   2   3   16.90    1.27
   3   2   3   15.50    1.37
   3   2   3   16.41    1.40
   3   2   3   18.18    1.09
   3   2   3   16.83    1.08
  -3  -1  -3   21.39    1.57
  -3  -1  -3   21.19    1.38
  -3  -1  -3   21.96    1.38
   3   1   3   21.23    1.57
   3   1   3   23.24    1.38
   3   1   3   19.46    1.57
   3   1   3   22.94    1.38
  -3   0  -3    5.63    0.43
  -3   0  -3    5.39    0.46
   3   0   3    5.59    0.46
   3   0   3    5.80    0.42
   3   0   3    5.49    0.43
  -3   1  -3   21.19    1.48
  -3   1  -3   23.25    1.53
  -3   1  -3   21.44    1.37
   3  -1   3   21.31    1.37
   3  -1   3   20.15    1.48
   3  -1   3   22.92    1.53
  -3   2  -3   22.93    1.26
   3  -2   3   18.15    1.33
   3  -2   3   17.18    1.26
   3  -2   3   18.15    1.41
  -3   3  -3    4.62    0.58
  -3   3  -3    3.06    0.64
   3  -3   3    4.37    0.69
   3  -3   3    5.27    0.59
  -3   4  -3    2.30    0.67
   3  -4   3    4.11    0.62
  -3   5  -3    3.72    0.88
   3  -5   3    2.95    0.67
  -3   6  -3    2.70    0.97
   3  -6   3    3.11    0.76
  -3   7  -3    1.56    1.14
   3  -7   3    0.40    0.78
   3  -8   3    2.19    1.02
  -4  -7  -3    2.38    0.94
   4   7   3   -0.16    1.68
   4   7   3    1.50    0.97
  -4  -6  -3    2.14    0.83
   4   6   3    2.86    1.51
   4   6   3    3.48    0.84
  -4  -5  -3    1.26    0.69
   4   5   3    2.76    0.72
   4   5   3    3.05    1.25
  -4  -4  -3    5.65    0.71
  -4  -4  -3    5.34    0.74
   4   4   3    5.36    0.81
   4   4   3    6.02    0.75
   4   4   3    7.56    1.21
  -4  -3  -3    4.13    0.60
  -4  -3  -3    3.60    0.57
   4   3   3    4.34    0.61
   4   3   3    4.51    0.69
   4   3   3    4.15    0.62
   4   3   3    4.79    1.06
  -4  -2  -3   34.41    2.15
  -4  -2  -3   29.76    2.53
  -4  -2  -3   29.43    2.52
  -4  -2  -3   33.42    2.15
   4   2   3   35.17    2.54
   4   2   3   36.69    2.16
   4   2   3   32.04    2.51
   4   2   3   36.42    2.15
  -4  -1  -3    7.10    0.73
  -4  -1  -3    7.18    0.60
   4   1   3    6.37    0.72
   4   1   3    8.34    0.62
   4   1   3    7.34    0.71
   4   1   3    8.15    0.60
  -4   0  -3   10.19    0.76
  -4   0  -3    9.49    0.70
   4   0   3    9.74    0.76
   4   0   3   10.02    0.72
   4   0   3    9.40    0.69
  -4   1  -3    6.75    0.52
  -4   1  -3    5.88    0.53
  -4   1  -3    5.91    0.51
   4  -1   3    6.22    0.51
   4  -1   3    5.98    0.53
   4  -1   3    6.11    0.50
  -4   2  -3   33.31    2.30
  -4   2  -3   34.86    2.37
  -4   2  -3   34.37    2.13
   4  -2   3   33.07    2.30
   4  -2   3   32.77    2.37
   4  -2   3   33.17    2.12
  -4   3  -3    3.90    0.61
  -4   3  -3    4.20    0.49
  -4   3  -3    3.90    0.57
   4  -3   3    3.64    0.65
   4  -3   3    4.14    0.60
  -4   4  -3    5.77    0.79
   4  -4   3    7.47    0.75
  -4   5  -3    1.19    0.69
   4  -5   3    0.53    0.64
  -4   6  -3    2.77    0.91
   4  -6   3    1.62    0.73
  -4   7  -3    0.80    1.01
   4  -7   3    0.57    0.80
  -5  -7  -3    2.79    0.95
   5   7   3    3.72    1.00
  -5  -6  -3    4.58    0.87
   5   6   3    6.50    1.59
   5   6   3    7.03    0.97
  -5  -5  -3    6.02    0.82
   5   5   3    5.90    1.38
   5   5   3    6.46    0.85
  -5  -4  -3   11.14    1.00
   5   4   3   11.20    1.46
   5   4   3   11.57    1.18
   5   4   3   11.72    1.02
  -5  -3  -3   12.31    1.00
   5   3   3   12.65    1.01
   5   3   3   12.82    1.47
   5   3   3   11.82    1.20
  -5  -2  -3    4.57    0.87
  -5  -2  -3    5.99    0.62
  -5  -2  -3    5.24    0.63
  -5  -2  -3    3.80    0.84
   5   2   3    7.35    0.68
   5   2   3    7.05    0.67
   5   2   3    4.93    0.83
   5   2   3    5.72    0.96
  -5  -1  -3   34.05    2.33
  -5  -1  -3   32.46    2.05
   5   1   3   30.53    2.33
   5   1   3   32.02    2.05
   5   1   3   32.79    2.05
   5   1   3   31.38    2.32
  -5   0  -3    0.56    0.34
  -5   0  -3    1.08    0.32
   5   0   3    0.91    0.30
   5   0   3    0.80    0.31
   5   0   3    0.96    0.26
  -5   1  -3   33.35    2.24
  -5   1  -3   31.85    2.01
  -5   1  -3   31.27    2.19
   5  -1   3   29.37    2.18
   5  -1   3   33.54    2.24
   5  -1   3   32.14    2.01
  -5   2  -3    4.78    0.60
  -5   2  -3    6.90    0.60
  -5   2  -3    6.16    0.64
   5  -2   3    6.19    0.61
   5  -2   3    4.83    0.62
   5  -2   3    6.53    0.59
  -5   3  -3   11.26    0.91
  -5   3  -3   10.17    0.95
  -5   3  -3   11.06    0.93
   5  -3   3   11.23    1.01
   5  -3   3   11.48    0.91
  -5   4  -3   10.86    1.02
  -5   4  -3   11.11    0.91
   5  -4   3   12.05    0.99
  -5   5  -3    6.57    0.88
   5  -5   3    5.39    0.79
  -5   6  -3    5.23    0.97
   5  -6   3    6.23    0.87
   5  -7   3    1.56    0.87
   5  -8   3    3.71    1.01
  -6  -8  -3    1.78    0.99
   6   8   3    2.32    1.12
  -6  -7  -3    2.82    0.94
   6   7   3    2.54    0.97
  -6  -6  -3    2.54    0.81
   6   6   3    3.04    0.87
  -6  -5  -3    5.96    0.86
   6   5   3    7.40    1.48
   6   5   3    8.07    1.06
   6   5   3    7.81    0.92
  -6  -4  -3    2.98    0.64
   6   4   3    3.54    1.16
   6   4   3    4.47    0.80
   6   4   3    3.00    0.67
  -6  -3  -3    7.65    0.86
   6   3   3    9.77    0.89
   6   3   3   10.06    1.06
   6   3   3   10.04    1.29
  -6  -2  -3   15.22    1.22
  -6  -2  -3   15.66    1.23
  -6  -2  -3   16.45    1.56
   6   2   3   18.86    1.26
   6   2   3   17.88    1.61
   6   2   3   18.31    1.24
  -6  -1  -3    6.44    0.78
  -6  -1  -3    7.27    0.68
   6   1   3    8.82    0.70
   6   1   3    5.60    0.78
   6   1   3    5.39    0.73
   6   1   3    6.72    0.70
  -6   0  -3    2.36    0.35
  -6   0  -3    2.26    0.47
  -6   0  -3    2.06    0.45
   6   0   3    2.01    0.42
   6   0   3    2.17    0.36
   6   0   3    2.12    0.42
  -6   1  -3    7.99    0.66
  -6   1  -3    5.42    0.67
  -6   1  -3    7.03    0.68
   6  -1   3    6.16    0.65
   6  -1   3    7.82    0.65
   6  -1   3    6.75    0.64
  -6   2  -3   18.20    1.22
  -6   2  -3   16.91    1.25
  -6   2  -3   16.21    1.16
   6  -2   3   16.02    1.20
   6  -2   3   15.45    1.25
   6  -2   3   15.26    1.16
  -6   3  -3    9.35    0.77
  -6   3  -3    7.88    0.82
   6  -3   3    8.41    0.87
   6  -3   3    8.43    0.82
  -6   4  -3    4.23    0.53
  -6   4  -3    3.80    0.66
   6  -4   3    3.25    0.67
  -6   5  -3    7.30    0.92
  -6   5  -3    7.51    0.76
   6  -5   3    6.70    0.86
   6  -6   3    2.67    0.81
  -7  -7  -3    0.16    0.87
  -7  -6  -3    2.16    0.78
   7   6   3    3.76    0.92
  -7  -5  -3    3.90    0.82
   7   5   3    7.10    0.91
   7   5   3    8.60    1.48
  -7  -4  -3   12.89    1.12
   7   4   3   12.67    1.11
   7   4   3   13.46    1.38
   7   4   3   15.35    1.68
  -7  -3  -3    1.30    0.56
   7   3   3    2.24    0.71
   7   3   3    2.92    0.62
   7   3   3    2.78    1.05
  -7  -2  -3   21.22    1.48
  -7  -2  -3   20.86    1.78
  -7  -2  -3   19.54    1.45
   7   2   3   20.35    1.47
   7   2   3   22.22    1.83
   7   2   3   20.68    1.48
  -7  -1  -3   12.18    0.98
  -7  -1  -3   12.28    1.16
   7   1   3   13.86    1.00
   7   1   3   11.07    1.05
   7   1   3   11.11    1.12
   7   1   3   13.06    1.18
  -7   0  -3   25.43    1.78
  -7   0  -3   23.81    1.66
  -7   0  -3   25.34    1.85
   7   0   3   26.41    1.79
   7   0   3   25.80    1.83
   7   0   3   23.20    1.66
  -7   1  -3   11.75    1.09
  -7   1  -3   13.75    1.04
  -7   1  -3   15.04    1.07
   7  -1   3   13.57    1.08
   7  -1   3   12.93    1.03
   7  -1   3   13.55    1.04
  -7   2  -3   18.59    1.32
  -7   2  -3   20.12    1.42
  -7   2  -3   18.63    1.39
   7  -2   3   18.28    1.41
   7  -2   3   19.46    1.34
   7  -2   3   18.50    1.37
  -7   3  -3    1.74    0.50
  -7   3  -3    2.47    0.45
   7  -3   3    1.08    0.50
   7  -3   3    1.85    0.59
  -7   4  -3   14.04    1.03
  -7   4  -3   11.98    1.10
   7  -4   3   10.65    1.03
  -7   5  -3    5.40    0.70
  -7   5  -3    6.22    0.86
   7  -5   3    5.14    0.82
  -7   6  -3    3.56    0.68
   7  -6   3    2.88    0.81
   7  -7   3    1.34    0.91
  -8  -8  -3    0.93    0.98
  -8  -7  -3    2.61    0.90
  -8  -6  -3    2.31    0.87
   8   6   3    1.89    1.62
   8   6   3    4.31    1.01
  -8  -5  -3    7.37    0.95
   8   5   3    6.78    1.55
   8   5   3    8.26    0.99
  -8  -4  -3    6.22    0.88
   8   4   3    9.75    0.95
   8   4   3    9.73    1.45
  -8  -3  -3    4.81    0.71
   8   3   3    4.03    1.10
   8   3   3    4.00    0.72
  -8  -2  -3    7.82    1.04
  -8  -2  -3    6.66    0.78
   8   2   3    8.03    0.83
   8   2   3    8.22    1.13
  -8  -1  -3    8.47    0.79
  -8  -1  -3    9.20    0.96
   8   1   3    6.76    0.76
   8   1   3    7.98    0.95
   8   1   3    7.09    0.73
   8   1   3    6.26    0.83
   8   1   3    9.39    0.84
  -8   0  -3   21.67    1.66
  -8   0  -3   22.25    1.49
  -8   0  -3   20.37    1.56
   8   0   3   21.35    1.57
   8   0   3   22.16    1.49
   8   0   3   21.22    1.63
  -8   1  -3    8.11    0.78
  -8   1  -3    7.61    0.75
  -8   1  -3    7.10    0.79
   8  -1   3    7.46    0.74
   8  -1   3    7.13    0.76
   8  -1   3    7.58    0.73
  -8   2  -3    7.40    0.74
  -8   2  -3    7.11    0.75
   8  -2   3    7.87    0.73
   8  -2   3    6.87    0.70
   8  -2   3    6.96    0.75
  -8   3  -3    4.98    0.62
  -8   3  -3    4.48    0.58
   8  -3   3    4.61    0.68
   8  -3   3    5.29    0.62
  -8   4  -3    8.28    0.91
  -8   4  -3    9.55    0.85
   8  -4   3    8.44    0.93
  -8   5  -3    7.61    0.93
  -8   5  -3    7.06    0.80
   8  -5   3    7.30    0.91
  -8   6  -3    3.98    0.71
   8  -6   3    1.87    0.82
   8  -7   3    0.79    0.96
  -9  -7  -3    3.71    1.05
  -9  -6  -3    7.44    1.06
   9   6   3    9.10    1.20
  -9  -5  -3    3.88    0.79
   9   5   3    5.10    0.90
   9   5   3    6.29    1.54
  -9  -4  -3   10.06    0.98
   9   4   3   10.05    1.56
   9   4   3    8.29    0.98
  -9  -3  -3    5.52    0.73
   9   3   3    6.30    1.17
   9   3   3    6.78    0.81
  -9  -2  -3   40.12    2.95
   9   2   3   40.41    3.00
   9   2   3   36.70    2.53
  -9  -1  -3    3.19    0.77
   9   1   3    2.28    0.58
   9   1   3    3.43    0.79
   9   1   3    3.37    0.54
  -9   0  -3   71.09    4.70
  -9   0  -3   70.81    4.83
  -9   0  -3   66.99    4.30
   9   0   3   68.82    4.81
   9   0   3   66.55    4.30
   9   0   3   69.95    4.71
  -9   1  -3    1.99    0.52
  -9   1  -3    3.30    0.58
   9  -1   3    2.58    0.51
   9  -1   3    2.73    0.48
   9  -1   3    2.39    0.56
  -9   2  -3   38.24    2.60
  -9   2  -3   34.21    2.55
   9  -2   3   37.50    2.36
   9  -2   3   37.34    2.60
   9  -2   3   35.43    2.53
  -9   3  -3    7.80    0.77
  -9   3  -3    8.11    0.75
   9  -3   3    7.58    0.80
   9  -3   3    5.86    0.74
  -9   4  -3   10.22    0.90
  -9   4  -3    9.10    0.96
   9  -4   3    9.71    1.00
  -9   5  -3    5.08    0.80
  -9   5  -3    4.45    0.68
   9  -5   3    3.63    0.86
  -9   6  -3    8.55    0.95
   9  -6   3    7.59    1.06
   9  -7   3    4.67    1.05
  10   7   3    2.15    1.09
 -10  -6  -3    1.91    0.87
  10   6   3    3.68    0.98
 -10  -5  -3    2.35    0.76
  10   5   3    2.52    0.86
  10   5   3    2.87    1.46
 -10  -4  -3    5.80    0.85
  10   4   3    6.57    0.94
  10   4   3    7.33    1.45
 -10  -3  -3   10.84    1.18
  10   3   3   16.84    1.27
  10   3   3   16.95    1.68
 -10  -2  -3   11.95    1.35
  10   2   3   10.56    1.33
  10   2   3   10.78    1.02
 -10  -1  -3    4.49    0.87
  10   1   3    4.62    0.66
  10   1   3    4.48    0.88
 -10   0  -3   57.37    4.07
 -10   0  -3   61.38    4.20
  10   0   3   62.43    4.20
  10   0   3   56.15    3.73
  10   0   3   60.57    4.09
 -10   1  -3    3.21    0.64
  10  -1   3    2.94    0.56
  10  -1   3    3.75    0.52
  10  -1   3    4.41    0.62
 -10   2  -3    9.49    0.91
 -10   2  -3   10.50    0.91
  10  -2   3    9.87    0.92
  10  -2   3    8.86    0.88
  10  -2   3    9.81    0.85
 -10   3  -3   12.55    1.03
 -10   3  -3   12.37    1.07
  10  -3   3   12.40    1.09
  10  -3   3   11.47    1.05
  10  -3   3   11.76    1.00
 -10   4  -3    8.10    0.82
 -10   4  -3    7.36    0.87
  10  -4   3    7.38    0.93
 -10   5  -3    3.07    0.73
 -10   5  -3    2.05    0.64
  10  -5   3    2.68    0.82
 -10   6  -3    3.51    0.77
  10  -6   3    2.23    0.92
 -11  -7  -3    0.85    0.92
  11   7   3    3.51    1.16
 -11  -6  -3    3.55    0.89
  11   6   3    3.32    1.06
 -11  -5  -3    4.18    0.88
  11   5   3    6.88    1.05
  11   5   3    6.44    1.72
 -11  -4  -3    8.71    0.99
  11   4   3   10.65    1.63
  11   4   3    9.38    1.08
 -11  -3  -3    9.92    1.02
  11   3   3   11.37    1.08
  11   3   3   11.15    1.49
 -11  -2  -3   10.12    1.27
  11   2   3   10.66    1.00
  11   2   3   10.26    1.33
 -11  -1  -3   17.65    1.62
  11   1   3   17.74    1.46
  11   1   3   18.89    1.37
  11   1   3   18.29    1.63
 -11   0  -3   26.95    2.03
 -11   0  -3   26.32    1.91
  11   0   3   27.23    1.92
  11   0   3   24.15    1.80
  11   0   3   26.97    2.02
 -11   1  -3   14.81    1.32
 -11   1  -3   15.81    1.27
  11  -1   3   17.18    1.25
  11  -1   3   15.52    1.27
  11  -1   3   15.07    1.20
 -11   2  -3   10.70    0.99
 -11   2  -3   10.88    0.95
  11  -2   3   10.32    0.90
  11  -2   3    9.80    0.95
  11  -2   3    9.48    0.93
 -11   3  -3   10.42    1.01
 -11   3  -3   10.44    0.97
  11  -3   3   10.56    1.03
  11  -3   3    9.81    0.96
 -11   4  -3    7.40    0.90
 -11   4  -3    9.04    0.92
  11  -4   3   10.58    0.99
 -11   5  -3    4.26    0.83
 -11   5  -3    4.71    0.75
  11  -5   3    4.20    0.92
 -11   6  -3    1.90    0.78
  11  -6   3    2.11    0.92
 -12  -7  -3    2.69    1.02
  12   7   3    2.44    1.15
 -12  -6  -3    1.38    0.88
 -12  -5  -3    3.70    0.91
  12   5   3    5.50    1.03
  12   5   3    3.96    1.73
 -12  -4  -3    4.51    0.79
  12   4   3    7.36    1.58
  12   4   3    5.44    0.89
  12   3   3    5.83    1.32
  12   3   3    6.30    0.90
 -12  -2  -3    2.77    1.00
  12   2   3    2.54    0.50
  12   2   3    1.64    0.67
  12   2   3    1.61    1.00
 -12  -1  -3   20.83    1.83
  12   1   3   22.85    1.89
  12   1   3   22.26    1.68
  12   1   3   19.25    1.55
 -12   0  -3    1.05    0.47
 -12   0  -3    0.81    0.71
  12   0   3    0.88    0.69
  12   0   3    0.52    0.47
  12   0   3    1.30    0.62
 -12   1  -3   17.24    1.46
 -12   1  -3   18.44    1.41
  12  -1   3   16.71    1.37
  12  -1   3   17.69    1.34
 -12   2  -3    2.23    0.58
 -12   2  -3    2.07    0.66
  12  -2   3    2.65    0.71
 -12   3  -3    6.72    0.87
 -12   3  -3    7.38    0.80
  12  -3   3    6.49    0.92
 -12   4  -3    7.22    0.90
 -12   4  -3    6.32    0.80
  12  -4   3    7.21    1.00
 -12   5  -3    4.97    0.89
 -12   5  -3    5.19    0.78
  12  -5   3    5.19    1.00
 -12   6  -3    2.88    0.81
 -12   7  -3    1.65    0.86
 -13  -7  -3    1.96    1.00
  13   7   3    1.11    1.16
  13   6   3    4.55    1.15
 -13  -5  -3    2.18    0.85
 -13  -4  -3    6.95    0.93
  13   4   3    8.99    1.06
  13   4   3    4.32    1.69
  13   3   3    3.79    1.29
  13   3   3    1.98    0.82
 -13  -2  -3   36.28    2.70
  13   2   3   32.12    2.35
  13   2   3   31.88    2.26
  13   2   3   30.42    2.65
 -13  -1  -3    5.84    1.05
  13   1   3    3.65    1.05
  13   1   3    2.66    0.75
  13   1   3    5.69    0.77
 -13   0  -3   46.06    3.17
 -13   0  -3   44.91    3.34
  13   0   3   46.89    3.33
  13   0   3   44.00    3.16
  13   0   3   44.63    2.94
 -13   1  -3    4.07    0.83
 -13   1  -3    5.14    0.69
  13  -1   3    4.33    0.62
  13  -1   3    4.57    0.77
 -13   2  -3   29.49    2.23
 -13   2  -3   31.57    2.30
  13  -2   3   30.72    2.12
 -13   3  -3    3.80    0.76
 -13   3  -3    2.88    0.66
  13  -3   3    3.14    0.82
 -13   4  -3    8.37    1.03
 -13   4  -3    8.02    0.90
  13  -4   3    7.40    1.08
 -13   5  -3    2.23    0.82
 -13   5  -3    3.70    0.76
  13  -5   3    0.30    0.94
 -13   6  -3    4.76    0.87
 -14  -6  -3    1.35    0.96
  14   6   3    0.09    1.06
 -14  -5  -3    2.37    0.82
  14   5   3   -0.33    0.95
 -14  -4  -3    2.33    0.80
  14   4   3    3.68    1.64
  14   4   3    2.98    0.95
  14   3   3    5.05    0.94
  14   3   3    7.41    1.52
 -14  -2  -3    9.45    1.42
  14   2   3    9.22    1.45
  14   2   3   11.40    1.16
  14   2   3   10.24    1.10
 -14  -1  -3    4.09    1.05
  14   1   3    3.48    0.75
  14   1   3    2.57    1.07
  14   1   3    3.36    0.76
 -14   0  -3   18.99    1.53
 -14   0  -3   19.39    1.75
  14   0   3   20.45    1.55
  14   0   3   19.06    1.55
  14   0   3   21.54    1.76
 -14   1  -3    3.35    0.67
 -14   1  -3    2.40    0.84
  14  -1   3    3.72    0.77
 -14   2  -3    9.29    1.02
 -14   2  -3    9.68    1.09
  14  -2   3    9.46    1.07
 -14   3  -3    5.83    0.81
 -14   3  -3    6.21    0.93
  14  -3   3    6.84    0.98
 -14   4  -3    3.41    0.77
 -14   4  -3    2.98    0.83
  14  -4   3    3.68    0.98
 -14   5  -3    1.55    0.77
  14  -5   3    2.86    1.00
 -14   6  -3    2.37    0.84
  15   6   3    1.25    1.12
 -15  -5  -3    2.43    0.87
  15   5   3    2.08    1.06
  15   4   3    1.66    0.96
  15   3   3   12.99    1.29
  15   3   3   12.55    1.82
 -15  -2  -3   12.10    1.58
  15   2   3    8.98    1.16
  15   2   3   12.42    1.21
  15   2   3    9.73    1.57
 -15  -1  -3    0.25    1.03
  15   1   3    1.45    0.79
  15   1   3    1.00    0.71
  15   1   3    0.40    1.07
 -15   0  -3    5.24    0.71
 -15   0  -3    5.75    1.06
  15   0   3    4.26    1.03
  15   0   3    6.33    0.90
 -15   1  -3    0.76    0.63
 -15   1  -3    0.27    0.83
  15  -1   3    2.04    0.81
  15  -1   3    1.93    0.77
 -15   2  -3   10.50    1.16
 -15   2  -3    9.25    1.09
  15  -2   3   10.37    1.14
 -15   3  -3   10.12    1.18
 -15   3  -3   11.43    1.23
  15  -3   3   14.01    1.25
 -15   4  -3    2.76    0.78
  15  -4   3    2.75    1.02
 -15   5  -3    2.34    0.83
 -15   6  -3    2.90    0.93
  15  -6   3    2.46    1.13
 -16  -6  -3    2.62    0.96
 -16  -5  -3    2.17    0.93
  16   5   3    2.04    1.10
  16   4   3    1.05    1.03
  16   3   3    2.83    1.00
  16   3   3    2.59    1.48
  16   3   3    3.74    0.70
  16   2   3    0.60    1.31
  16   2   3    1.43    0.92
  16   2   3    1.44    0.75
 -16  -1  -3   14.05    1.68
  16   1   3   12.26    1.28
  16   1   3   12.92    1.69
 -16   0  -3    4.01    1.09
 -16   0  -3    2.86    0.61
  16   0   3    2.07    1.09
  16   0   3    2.32    0.87
 -16   1  -3   12.41    1.45
 -16   1  -3   13.42    1.29
  16  -1   3   13.88    1.25
  16  -1   3   11.17    1.41
 -16   2  -3    0.55    0.71
 -16   2  -3    1.97    0.89
  16  -2   3    1.93    0.88
 -16   3  -3    4.22    0.83
  16  -3   3    4.41    1.03
 -16   4  -3    1.31    0.81
  16  -4   3    3.64    1.09
 -16   5  -3    4.00    0.93
 -16   6  -3    2.61    0.92
 -17  -6  -3    1.87    1.00
  17   5   3    0.55    1.13
  17   4   3    4.43    1.18
  17   3   3    2.11    1.02
  17   3   3    1.99    1.59
  17   3   3    2.22    0.77
  17   2   3    2.00    1.49
  17   2   3    4.43    1.04
 -17  -1  -3    5.87    1.38
  17   1   3    4.61    1.06
 -17   0  -3    7.29    1.44
  17   0   3    4.32    1.39
  17   0   3   11.49    1.21
 -17   1  -3    5.57    1.24
 -17   1  -3    5.56    0.87
  17  -1   3    6.56    1.16
  17  -1   3    7.01    1.04
 -17   2  -3    4.89    0.86
  17  -2   3    3.64    1.00
 -17   3  -3    1.91    0.81
  17  -3   3    3.26    1.04
 -17   4  -3    3.77    0.87
  17  -4   3    2.37    1.14
 -17   5  -3    0.31    0.85
  18   4   3    0.68    1.14
  18   3   3    2.40    1.14
  18   2   3    2.28    1.07
 -18  -1  -3    0.30    1.30
  18   1   3    1.49    0.99
  18   1   3    2.82    1.40
 -18   0  -3    1.90    1.23
  18   0   3    1.83    0.99
 -18   1  -3    1.67    0.74
  18  -1   3    2.49    1.08
  18  -1   3    2.31    0.97
 -18   2  -3    2.14    0.82
  18  -2   3    2.90    1.03
 -18   3  -3    1.34    0.83
  18  -3   3    4.46    1.15
 -18   4  -3   -0.08    0.85
  18  -4   3   -0.28    1.14
 -18   5  -3    2.05    0.92
  19   4   3    1.39    1.18
  19   3   3    8.56    1.44
  19   2   3    2.14    1.10
  19   1   3    5.08    1.19
  19   0   3    4.96    1.16
 -19   1  -3    5.01    0.88
  19  -1   3    5.23    1.13
 -19   2  -3    4.17    0.94
  19  -2   3    2.26    1.07
 -19   3  -3    5.49    1.06
  19  -3   3    9.85    1.36
 -19   4  -3    0.38    0.90
  19  -4   3    2.26    1.21
 -19   5  -3    1.96    0.97
  20   4   3    1.12    1.22
  20   3   3    0.66    1.25
  20   2   3    0.31    1.09
  20   1   3    1.65    1.12
  20   0   3    3.40    1.16
 -20   1  -3    2.80    0.84
  20  -1   3    3.77    1.13
 -20   2  -3    0.23    0.88
  20  -2   3    2.13    1.10
 -20   3  -3    1.50    0.92
  20  -3   3    2.25    1.22
 -20   4  -3    0.44    0.95
  21   3   3    0.33    1.24
  21   2   3    4.62    1.26
  21   1   3    6.65    1.31
  21   0   3    3.30    1.23
  21  -1   3    4.60    1.21
 -21   2  -3    2.97    0.97
  21  -2   3    4.78    1.19
 -21   3  -3    0.30    0.92
  21  -3   3    0.37    1.22
  22   2   3    1.60    1.21
  22   1   3    1.81    1.22
  22   0   3    1.20    1.19
  22  -1   3    2.09    1.19
  22  -2   3    2.05    1.22
 -22   2   4   -0.91    0.91
  22  -1  -4    2.52    1.09
 -22   1   4    2.84    0.97
  22   0  -4    7.05    1.25
  22   1  -4    2.67    1.11
  22   2  -4    0.97    1.11
 -21   3   4   -0.29    0.93
 -21   2   4    3.95    1.03
  21  -1  -4    1.76    1.06
 -21   1   4    2.97    0.89
  21   0  -4    4.65    1.14
  21   1  -4    4.88    1.14
  21   2  -4    5.00    1.20
  21   3  -4   -0.42    1.22
 -20   4   4    1.71    0.97
 -20   3   4    1.54    0.93
 -20   2   4    0.96    0.92
  20  -1  -4    5.74    1.08
 -20   1   4    3.20    0.93
  20   0  -4    3.01    1.03
  20   1  -4    3.91    1.09
  20   2  -4    1.40    1.12
  20   3  -4    2.74    1.20
  20   4  -4    1.11    1.17
 -19   4   4    0.83    0.92
 -19   3   4    2.09    0.91
 -19   2   4    8.67    1.14
  19  -1  -4    3.41    0.99
 -19   1   4    3.38    0.86
  19   0  -4   20.73    1.69
  19   1  -4    2.18    0.98
  19   2  -4   11.30    1.41
  19   3  -4    3.85    1.20
 -18   5   4    0.81    0.89
 -18   4   4    1.63    0.86
 -18   3   4    0.98    0.83
  18  -2  -4    4.05    0.98
 -18   2   4    2.11    0.86
  18  -1  -4    4.96    0.95
 -18   1   4    3.04    0.84
  18   0  -4    8.30    1.10
  18   1  -4    6.24    1.04
  18   2  -4    3.09    1.02
  18   3  -4   -0.03    1.00
  18   4  -4    1.92    1.11
 -17   5   4    1.48    0.87
 -17   4   4    9.20    1.11
 -17   3   4    1.18    0.80
  17  -2  -4   14.04    1.27
 -17   2   4   12.05    1.34
  17  -1  -4    7.80    1.00
 -17   1   4    7.10    0.97
  17   0  -4   58.50    3.57
 -17   0   4   52.00    3.88
  17   1  -4    6.84    0.99
  17   1  -4    3.82    1.46
  17   2  -4   19.83    1.68
  17   3  -4   -0.27    0.94
  17   4  -4   11.52    1.39
 -17  -5   4    0.77    0.94
 -16   6   4    2.44    0.89
 -16   5   4    4.01    0.92
 -16   4   4    1.25    0.78
 -16   3   4    4.03    0.83
  16  -2  -4    2.17    0.83
 -16   2   4    1.70    0.73
  16  -1  -4   15.52    1.33
 -16   1   4   16.66    1.48
  16   0  -4    6.14    1.32
  16   0  -4    8.48    0.99
 -16   0   4    7.64    0.92
  16   1  -4   18.02    1.45
  16   1  -4   15.10    1.89
  16   2  -4    1.23    0.86
  16   3  -4    3.46    0.97
  16   3  -4    2.42    1.65
  16   4  -4    1.62    0.99
 -16  -4   4    2.29    0.90
  16   5  -4    2.98    1.09
 -16  -5   4    5.22    1.05
 -15   6   4    1.15    0.82
 -15   5   4    3.88    0.83
 -15   4   4    3.35    0.78
  15  -3  -4    5.57    0.95
 -15   3   4    5.01    0.81
  15  -2  -4    4.22    0.81
 -15   2   4    4.36    0.76
  15  -1  -4    0.38    0.86
  15  -1  -4    2.94    0.70
 -15   1   4    1.95    0.69
  15   0  -4   11.85    1.45
  15   0  -4   12.79    1.16
 -15   0   4   13.30    1.22
  15   1  -4    3.19    0.76
  15   1  -4    0.28    1.14
  15   2  -4    1.10    1.33
  15   2  -4    1.70    0.81
  15   3  -4    2.31    1.58
  15   3  -4    5.02    0.95
  15   4  -4    3.04    0.95
 -15  -4   4    2.71    0.86
  15   5  -4    4.68    1.09
 -15  -5   4    2.93    1.03
 -14   7   4    1.62    0.89
 -14   6   4    1.60    0.76
 -14   5   4    0.96    0.72
 -14   4   4    3.50    0.75
  14  -3  -4    3.06    0.80
 -14   3   4    3.28    0.68
  14  -2  -4    6.15    0.84
 -14   2   4    5.63    0.77
  14  -1  -4    6.49    0.79
 -14   1   4    5.28    0.79
  14   0  -4    5.92    1.12
  14   0  -4    6.57    0.85
 -14   0   4    7.39    0.85
  14   1  -4    6.76    1.27
  14   1  -4    6.97    0.89
  14   2  -4    5.31    1.43
  14   2  -4    7.48    0.92
  14   3  -4    2.70    0.82
  14   3  -4    1.62    1.48
 -14  -3   4    2.90    0.77
  14   4  -4    2.84    0.93
 -14  -4   4    3.45    0.83
  14   5  -4    1.57    0.99
 -14  -5   4    2.50    0.92
  14   6  -4    2.24    1.07
 -14  -6   4    1.81    0.98
 -13   5   4    1.36    0.68
 -13   4   4    7.67    0.86
  13  -3  -4    6.24    0.84
 -13   3   4    5.31    0.73
  13  -2  -4   15.74    1.29
 -13   2   4   17.60    1.38
  13  -1  -4    6.43    0.74
 -13   1   4    4.26    0.73
  13   0  -4   40.47    3.20
  13   0  -4   45.43    2.86
  13   0  -4   45.07    3.28
 -13   0   4   43.63    3.13
 -13   0   4   47.67    3.22
  13   1  -4    5.98    0.82
  13   1  -4    6.25    0.81
  13   1  -4    5.50    1.19
  13   2  -4   13.22    1.18
  13   2  -4   14.41    1.23
  13   2  -4   10.95    1.64
  13   3  -4    5.85    1.53
  13   3  -4    6.45    0.89
 -13  -3   4    5.55    0.84
  13   4  -4    7.11    1.00
 -13  -4   4    8.52    0.99
  13   5  -4    2.60    0.96
 -13  -5   4    3.30    0.88
  13   6  -4    3.82    1.11
 -13  -6   4    4.17    1.02
 -12   5   4    4.57    0.73
  12  -4  -4    5.55    0.94
 -12   4   4    7.08    0.77
  12  -3  -4    8.90    0.93
 -12   3   4    7.79    0.86
  12  -2  -4    1.58    0.63
 -12   2   4    2.17    0.56
  12  -1  -4    7.72    0.84
  12  -1  -4    8.86    0.85
 -12   1   4   10.56    0.89
 -12   1   4   10.36    0.95
  12   0  -4    4.01    0.74
  12   0  -4    6.02    0.70
  12   0  -4    4.76    0.62
  12   0  -4    6.31    0.96
 -12   0   4    5.97    0.79
 -12   0   4    4.99    0.66
 -12   0   4    5.76    0.70
  12   1  -4    8.95    1.24
  12   1  -4    8.11    0.90
  12   1  -4    8.36    0.86
  12   2  -4    0.92    1.16
  12   2  -4    0.57    0.54
  12   2  -4    1.56    0.68
  12   3  -4    7.92    0.94
  12   3  -4    8.95    1.56
 -12  -3   4    8.03    0.89
  12   4  -4    6.37    1.68
  12   4  -4    6.84    0.95
 -12  -4   4    6.55    0.90
  12   5  -4    3.15    1.82
  12   5  -4    5.85    0.97
 -12  -5   4    5.40    0.91
  12   6  -4    3.24    1.01
 -12  -6   4    3.35    0.97
  12   7  -4    2.18    1.11
  11  -4  -4    3.68    0.82
  11  -3  -4    7.63    0.89
 -11   3   4    9.43    0.87
  11  -2  -4    5.49    0.69
 -11   2   4    5.73    0.65
 -11   2   4    5.32    0.67
  11  -1  -4    5.80    0.72
  11  -1  -4    7.31    0.75
 -11   1   4    7.31    0.81
 -11   1   4    9.03    0.76
  11   0  -4    0.96    0.56
  11   0  -4    1.18    0.52
  11   0  -4    2.10    0.46
  11   0  -4    1.30    0.80
 -11   0   4    2.70    0.50
 -11   0   4    1.13    0.61
 -11   0   4    3.11    0.53
  11   1  -4    5.80    0.73
  11   1  -4    5.97    1.08
  11   1  -4    7.34    0.74
  11   1  -4    7.80    0.84
 -11  -1   4    5.54    0.68
  11   2  -4    2.69    1.12
  11   2  -4    4.23    0.67
 -11  -2   4    2.97    0.62
  11   3  -4    8.31    0.89
  11   3  -4    9.08    1.49
 -11  -3   4    6.12    0.83
  11   4  -4    2.75    1.59
  11   4  -4    3.34    0.80
 -11  -4   4    4.85    0.77
  11   5  -4    6.38    1.01
  11   5  -4    7.50    1.84
 -11  -5   4    5.62    0.94
  11   6  -4    2.80    1.03
 -11  -6   4    1.97    0.94
  11   7  -4    3.21    1.09
 -11  -7   4    1.21    0.92
 -11  -8   4    1.33    1.07
  10  -5  -4    3.81    0.87
  10  -4  -4    8.05    0.93
  10  -3  -4    9.90    0.96
 -10   3   4   10.76    0.91
  10  -2  -4   15.10    1.11
 -10   2   4   14.59    1.17
 -10   2   4   15.32    1.10
  10  -1  -4   14.25    1.04
  10  -1  -4   12.90    1.07
 -10   1   4   15.08    1.04
 -10   1   4   13.09    1.14
  10   0  -4    3.01    0.86
  10   0  -4    4.87    0.58
  10   0  -4    4.31    0.54
  10   0  -4    1.77    0.68
 -10   0   4    5.08    0.58
 -10   0   4    3.50    0.77
 -10   0   4    7.94    0.73
  10   1  -4   12.42    1.37
  10   1  -4   14.56    1.49
  10   1  -4   13.54    1.13
  10   1  -4   16.35    1.25
  10   1  -4   15.16    1.12
 -10  -1   4   15.30    1.11
 -10  -1   4   15.41    1.43
  10   2  -4   14.48    1.17
  10   2  -4   16.64    1.67
 -10  -2   4   15.55    1.15
  10   3  -4    8.04    0.92
  10   3  -4   10.22    1.51
 -10  -3   4    8.44    0.88
  10   4  -4    7.34    0.92
  10   4  -4    8.00    1.54
 -10  -4   4    7.47    0.87
  10   5  -4    2.49    1.52
  10   5  -4    2.70    0.83
 -10  -5   4    1.35    0.71
  10   6  -4    2.62    0.98
 -10  -6   4    1.75    0.87
 -10  -7   4    1.01    1.00
  10   8  -4    3.38    1.22
 -10  -8   4    2.76    1.07
   9  -5  -4    4.16    0.84
   9  -4  -4    8.69    0.93
   9  -3  -4   12.89    1.05
  -9   3   4   13.37    1.01
   9  -2  -4   15.62    1.30
  -9   2   4   20.44    1.42
  -9   2   4   21.30    1.31
   9  -1  -4    6.06    0.61
   9  -1  -4    4.72    0.55
  -9   1   4    6.13    0.60
  -9   1   4    5.51    0.63
   9   0  -4    6.73    0.68
   9   0  -4    4.91    0.79
   9   0  -4    5.03    0.92
   9   0  -4    8.06    0.71
  -9   0   4    5.52    0.87
   9   1  -4    6.37    0.73
   9   1  -4    6.15    0.69
   9   1  -4    6.34    1.08
   9   1  -4    6.31    0.70
  -9  -1   4    6.19    0.66
  -9  -1   4    8.74    0.99
   9   2  -4    7.18    1.32
   9   2  -4    7.79    0.87
   9   2  -4   10.26    0.86
  -9  -2   4   12.32    0.88
  -9  -2   4    8.55    0.89
   9   3  -4   14.58    1.13
   9   3  -4   15.12    1.66
  -9  -3   4   13.60    1.11
   9   4  -4    7.79    0.91
   9   4  -4    8.69    1.56
  -9  -4   4    9.24    0.92
   9   5  -4    2.75    1.40
   9   5  -4    3.38    0.82
  -9  -5   4    4.67    0.81
   9   6  -4    4.27    0.92
   9   6  -4    3.52    1.78
  -9  -6   4    3.06    0.88
   9   7  -4    1.45    1.03
  -9  -7   4    2.90    0.91
   9   8  -4    3.20    1.16
  -9  -8   4    2.65    1.04
  -8   7   4    1.30    0.77
  -8   6   4    1.38    0.62
   8  -5  -4    2.42    0.78
   8  -4  -4    4.85    0.74
   8  -3  -4    6.58    0.70
  -8   3   4    6.10    0.66
   8  -2  -4    2.14    0.49
  -8   2   4    3.28    0.45
  -8   2   4    2.47    0.46
   8  -1  -4    2.23    0.40
   8  -1  -4    3.54    0.48
  -8   1   4    3.41    0.48
  -8   1   4    3.72    0.47
   8   0  -4    8.22    0.76
   8   0  -4    7.76    0.88
   8   0  -4    7.76    0.70
   8   0  -4    8.03    0.93
  -8   0   4    6.81    0.69
  -8   0   4    9.01    0.82
  -8   0   4    7.35    0.89
   8   1  -4    3.09    0.52
   8   1  -4    3.01    0.53
   8   1  -4    3.83    0.94
   8   1  -4    3.03    0.52
  -8  -1   4    2.09    0.47
  -8  -1   4    2.71    0.78
   8   2  -4    1.68    1.06
   8   2  -4    1.58    0.56
   8   2  -4    2.07    0.58
  -8  -2   4    1.88    0.51
  -8  -2   4    1.70    0.53
   8   3  -4    6.39    1.19
   8   3  -4    4.90    0.71
  -8  -3   4    5.57    0.69
   8   4  -4    4.00    1.25
   8   4  -4    3.74    0.73
  -8  -4   4    3.90    0.70
   8   5  -4    2.71    1.30
   8   5  -4    2.97    0.79
  -8  -5   4    2.92    0.70
   8   6  -4    4.93    1.67
   8   6  -4    3.21    0.90
  -8  -6   4    2.28    0.82
   8   7  -4    3.43    1.06
  -8  -7   4    2.12    0.99
   8   8  -4    2.43    1.12
  -8  -8   4   -1.23    0.99
   7  -6  -4    3.16    0.90
  -7   6   4    3.63    0.76
   7  -5  -4    1.57    0.74
  -7   5   4    3.06    0.59
   7  -4  -4   13.94    1.13
   7  -3  -4    8.40    0.77
  -7   3   4    7.61    0.74
   7  -2  -4   13.49    1.06
  -7   2   4   16.40    1.06
   7  -1  -4   10.03    0.81
  -7   1   4   11.24    0.82
  -7   1   4   11.69    0.91
   7   0  -4    4.87    0.75
   7   0  -4    4.50    0.50
   7   0  -4    5.15    0.58
  -7   0   4    4.74    0.50
  -7   0   4    4.57    0.55
  -7   0   4    4.92    0.70
   7   1  -4    8.98    0.76
   7   1  -4    7.97    0.76
   7   1  -4    9.89    1.14
   7   1  -4    8.25    0.83
  -7  -1   4    9.43    0.74
  -7  -1   4   10.51    1.09
  -7  -1   4    9.86    0.76
   7   2  -4   14.69    1.47
   7   2  -4   10.76    0.98
   7   2  -4   12.84    0.99
  -7  -2   4   13.27    0.96
  -7  -2   4   12.48    0.98
   7   3  -4    8.14    0.95
   7   3  -4    7.98    1.23
   7   3  -4    7.60    0.79
  -7  -3   4    7.86    0.77
   7   4  -4   11.74    1.28
   7   4  -4   13.84    1.59
   7   4  -4   12.50    1.06
  -7  -4   4   13.17    1.05
   7   5  -4    4.17    1.31
   7   5  -4    2.38    0.74
  -7  -5   4    1.92    0.73
   7   6  -4    5.18    0.97
  -7  -6   4    4.55    0.88
   7   7  -4    1.23    1.00
  -7  -7   4    1.03    0.89
   7   8  -4    0.12    1.08
  -7  -8   4    0.21    1.00
  -6   7   4    1.54    0.92
   6  -6  -4    1.97    0.82
  -6   6   4    1.91    0.76
   6  -5  -4    5.93    0.83
   6  -5  -4    2.85    0.85
  -6   5   4    4.34    0.72
   6  -4  -4    8.12    0.85
   6  -3  -4    7.70    0.73
  -6   3   4    7.43    0.70
   6  -2  -4   12.24    0.91
  -6   2   4   12.24    0.89
   6  -1  -4   16.11    1.05
  -6   1   4   15.59    1.06
  -6   1   4   16.02    1.17
   6   0  -4   54.89    3.51
   6   0  -4   60.34    3.89
   6   0  -4   59.58    3.97
  -6   0   4   52.21    3.51
  -6   0   4   55.85    3.89
  -6   0   4   60.84    3.98
   6   1  -4   17.14    1.20
   6   1  -4   18.92    1.51
   6   1  -4   17.66    1.22
  -6  -1   4   18.61    1.50
  -6  -1   4   18.51    1.21
  -6  -1   4   17.93    1.20
   6   2  -4   10.45    1.09
   6   2  -4   11.78    1.30
   6   2  -4   11.72    0.93
   6   2  -4   11.09    0.92
  -6  -2   4   14.31    0.92
  -6  -2   4   11.69    1.29
   6   3  -4    6.79    1.19
   6   3  -4    8.71    0.79
   6   3  -4    7.03    0.78
  -6  -3   4    7.51    0.78
   6   4  -4    6.33    1.17
   6   4  -4    5.49    0.74
  -6  -4   4    6.09    0.74
  -6  -4   4    6.02    0.78
   6   5  -4    8.34    1.44
   6   5  -4    5.08    0.85
  -6  -5   4    5.74    0.80
   6   6  -4    3.87    1.49
   6   6  -4    2.94    0.85
  -6  -6   4    3.35    0.77
   6   7  -4    2.53    0.97
  -6  -7   4    1.71    0.86
   6   8  -4    1.58    1.07
  -6  -8   4    1.05    0.93
   5  -7  -4    2.39    0.98
   5  -6  -4    4.28    0.86
  -5   6   4    4.36    0.92
   5  -5  -4    0.61    0.76
   5  -5  -4    0.86    0.67
  -5   5   4    0.74    0.69
   5  -4  -4    9.07    0.83
   5  -4  -4    8.73    1.02
  -5   4   4    8.25    0.89
   5  -3  -4    2.04    0.53
  -5   3   4    3.28    0.52
   5  -2  -4   12.64    0.85
  -5   2   4   10.66    0.82
   5  -1  -4    3.56    0.37
   5   0  -4   62.12    3.90
   5   0  -4   58.01    3.89
   5   0  -4   65.28    4.32
   5   0  -4   71.32    4.41
  -5   0   4   64.66    4.33
  -5   0   4   70.42    4.41
  -5   0   4   56.37    3.89
   5   1  -4    2.99    0.39
   5   1  -4    2.77    0.41
   5   1  -4    3.36    0.66
  -5  -1   4    3.09    0.37
  -5  -1   4    3.20    0.39
  -5  -1   4    2.27    0.59
   5   2  -4   10.40    1.20
   5   2  -4   10.42    0.85
   5   2  -4    8.73    0.85
   5   2  -4   11.10    1.00
  -5  -2   4   12.59    0.84
  -5  -2   4    9.58    1.12
   5   3  -4    1.97    0.60
   5   3  -4    0.83    0.93
   5   3  -4    1.94    0.57
   5   3  -4    2.18    0.55
  -5  -3   4    1.98    0.54
  -5  -3   4    2.08    0.54
   5   4  -4   11.11    1.34
  -5  -4   4   10.08    1.06
  -5  -4   4    9.92    0.90
   5   5  -4    1.08    1.18
  -5  -5   4    3.31    0.70
  -5  -6   4    4.40    0.83
   5   7  -4    1.85    1.70
  -5  -7   4    2.19    0.87
  -5  -8   4    1.93    0.99
   4  -7  -4    2.92    0.92
   4  -6  -4    1.22    0.81
  -4   6   4    3.27    0.94
   4  -5  -4    1.68    0.64
   4  -5  -4    0.08    0.55
  -4   5   4    1.85    0.78
   4  -4  -4    2.00    0.69
   4  -4  -4    2.31    0.59
  -4   4   4    2.86    0.67
   4  -3  -4    8.01    0.69
  -4   3   4    5.55    0.64
  -4   3   4    5.92    0.72
   4  -2  -4   25.54    1.74
  -4   2   4   29.16    1.73
   4   0  -4    5.81    0.53
   4   0  -4    6.64    0.51
  -4   0   4    4.46    0.52
  -4   0   4    6.28    0.51
   4   1  -4    3.65    0.37
   4   1  -4    3.68    0.38
   4   1  -4    3.20    0.57
  -4  -1   4    4.09    0.54
  -4  -1   4    4.16    0.37
   4   2  -4   26.52    1.96
   4   2  -4   23.80    1.66
   4   2  -4   23.05    2.02
  -4  -2   4   23.73    2.02
  -4  -2   4   28.27    1.95
  -4  -2   4   27.98    1.66
   4   3  -4    6.63    1.08
   4   3  -4    6.47    0.76
   4   3  -4    6.69    0.72
  -4  -3   4    6.22    0.74
  -4  -3   4    7.14    0.72
   4   4  -4    4.57    1.04
   4   4  -4    2.56    0.64
  -4  -4   4    2.02    0.61
  -4  -4   4    1.95    0.58
   4   5  -4    0.57    0.74
   4   5  -4    2.85    1.20
  -4  -5   4    2.76    0.69
  -4  -5   4    1.53    0.64
   4   6  -4    2.97    1.40
  -4  -6   4    2.27    0.81
  -4  -7   4    4.29    0.96
  -4  -8   4    2.01    0.98
   3  -6  -4    1.13    0.74
  -3   6   4    1.41    0.95
   3  -5  -4    0.71    0.55
   3  -5  -4    0.53    0.66
  -3   5   4    1.10    0.80
   3  -4  -4    5.50    0.69
   3  -4  -4    5.37    0.67
   3  -4  -4    3.30    0.83
  -3   4   4    5.26    0.85
   3  -3  -4    1.37    0.48
   3  -3  -4    1.54    0.62
  -3   3   4    3.09    0.67
  -3   3   4    1.38    0.50
   3  -2  -4   69.37    4.16
  -3   2   4   66.55    4.15
   3   0  -4  189.73   11.75
   3   0  -4  157.12   11.55
   3   0  -4  165.74   11.55
  -3   0   4  157.71   11.56
  -3   0   4  192.90   11.75
   3   1  -4   10.74    0.83
   3   1  -4   10.82    0.71
   3   1  -4    9.23    0.88
  -3  -1   4    9.72    0.87
  -3  -1   4   11.95    0.70
   3   2  -4   68.84    4.81
   3   2  -4   65.59    4.21
   3   2  -4   65.38    4.94
  -3  -2   4   71.24    4.21
  -3  -2   4   75.98    4.95
  -3  -2   4   64.88    4.79
   3   3  -4    1.81    0.53
   3   3  -4    0.98    0.53
   3   3  -4    1.72    0.88
  -3  -3   4    1.68    0.47
  -3  -3   4    1.46    0.52
   3   4  -4    6.86    1.11
   3   4  -4    4.99    0.77
  -3  -4   4    5.31    0.74
  -3  -4   4    6.03    0.67
   3   5  -4    0.91    1.12
  -3  -5   4    0.74    0.59
  -3  -5   4    1.20    0.59
   3   6  -4    2.66    1.28
  -3  -6   4    1.35    0.73
   3   7  -4    1.73    1.51
  -3  -7   4    1.39    0.84
  -3  -8   4    0.22    0.97
   2  -6  -4   -0.73    0.67
  -2   6   4    1.15    0.99
   2  -5  -4    1.76    0.61
   2  -5  -4    2.56    0.65
  -2   5   4    2.17    0.91
   2  -4  -4    1.83    0.55
   2  -4  -4    1.34    0.76
   2  -4  -4    1.88    0.57
  -2   4   4    1.36    0.87
   2  -3  -4    1.82    0.70
   2  -3  -4    2.39    0.51
   2  -3  -4    3.38    0.54
  -2   3   4    3.85    0.52
  -2   3   4    4.25    0.75
   2  -2  -4    5.25    0.51
   2  -2  -4    3.29    0.60
   2  -2  -4    5.80    0.57
  -2   2   4    6.32    0.70
  -2   2   4    5.49    0.63
  -2   1   4    4.89    0.34
   2   0  -4    1.73    0.19
  -2   0   4    1.34    0.17
  -2   0   4    1.14    0.16
   2   1  -4    4.96    0.44
   2   1  -4    4.63    0.39
   2   1  -4    5.93    0.49
   2   1  -4    3.85    0.43
  -2  -1   4    4.56    0.37
  -2  -1   4    4.91    0.48
  -2  -1   4    5.39    0.42
   2   2  -4    9.24    0.77
   2   2  -4    8.33    0.69
   2   2  -4    5.69    0.86
  -2  -2   4    8.96    0.67
  -2  -2   4    6.56    0.82
  -2  -2   4    9.20    0.74
   2   3  -4    3.68    0.57
   2   3  -4    3.73    0.59
   2   3  -4    2.61    0.85
  -2  -3   4    4.19    0.56
  -2  -3   4    3.36    0.58
   2   4  -4    1.55    0.90
  -2  -4   4    2.49    0.57
  -2  -4   4    2.40    0.60
   2   5  -4    2.67    1.08
  -2  -5   4    1.91    0.66
  -2  -5   4    2.92    0.60
   2   6  -4    0.63    1.21
  -2  -6   4    0.89    0.65
  -2  -7   4    0.81    0.76
  -2  -8   4    2.07    0.95
   1  -7  -4    1.27    0.93
  -1   7   4    1.33    1.18
   1  -6  -4    5.99    0.96
  -1   6   4    8.22    1.28
   1  -5  -4    1.83    0.66
   1  -5  -4    1.26    0.61
  -1   5   4    1.16    1.01
   1  -4  -4    2.13    0.57
   1  -4  -4    2.64    0.58
   1  -4  -4    2.08    0.82
  -1   4   4    2.28    0.91
   1  -3  -4   11.00    1.21
   1  -3  -4   11.63    0.93
   1  -3  -4   12.42    1.07
  -1   3   4   11.50    0.91
  -1   3   4   12.78    1.25
  -1   3   4   11.72    1.27
   1  -2  -4   41.20    3.20
   1  -2  -4   42.98    3.28
   1  -2  -4   46.19    2.80
  -1   2   4   45.87    2.79
  -1   2   4   47.95    3.19
  -1   2   4   45.82    3.29
  -1   2   4   47.79    3.20
   1  -1  -4   34.61    2.45
   1  -1  -4   35.60    2.36
   1  -1  -4   32.79    2.09
  -1   1   4   36.36    2.36
  -1   1   4   32.17    2.09
  -1   1   4   31.17    2.08
  -1   1   4   36.64    2.45
   1   0  -4   17.24    1.20
   1   1  -4   38.26    2.53
   1   1  -4   34.50    2.46
   1   1  -4   37.49    2.23
  -1  -1   4   39.38    2.53
  -1  -1   4   37.39    2.23
  -1  -1   4   31.87    2.46
   1   2  -4   50.55    3.44
   1   2  -4   50.54    3.03
   1   2  -4   45.37    3.33
  -1  -2   4   48.92    3.54
  -1  -2   4   49.29    3.02
  -1  -2   4   50.12    3.44
   1   3  -4   12.25    0.99
   1   3  -4   12.40    1.24
  -1  -3   4   13.10    0.97
  -1  -3   4   13.44    1.12
  -1  -3   4   12.25    1.23
   1   4  -4    2.87    0.88
  -1  -4   4    2.74    0.57
  -1  -4   4    2.48    0.58
   1   5  -4    1.05    0.92
  -1  -5   4    1.39    0.61
  -1  -5   4    0.50    0.62
   1   6  -4    7.40    1.27
  -1  -6   4    5.31    0.85
   1   7  -4    1.96    1.27
  -1  -7   4    1.48    0.80
  -1  -8   4    2.34    0.91
   0  -8  -4    0.40    1.02
   0  -6  -4    3.11    0.86
   0   6   4    4.67    1.31
   0  -5  -4   -0.15    0.66
   0  -5  -4    0.34    0.56
   0   5   4   -1.61    1.08
   0  -4  -4    2.85    0.60
   0  -4  -4    4.30    0.68
   0   4   4    3.78    0.97
   0  -3  -4   19.16    1.27
   0  -3  -4   18.56    1.60
   0  -3  -4   16.94    1.44
   0   3   4   17.44    1.62
   0   3   4   17.66    1.23
   0   3   4   18.41    1.47
   0   3   4   18.63    1.61
   0  -2  -4   68.61    5.48
   0  -2  -4   76.57    4.66
   0  -2  -4   79.37    5.28
   0  -2  -4   80.29    5.30
   0   2   4   81.47    5.28
   0   2   4   86.05    5.30
   0   2   4   72.82    5.48
   0   2   4   68.43    4.65
   0   2   4   75.55    4.66
   0  -1  -4   25.55    1.55
   0  -1  -4   23.84    1.55
   0  -1  -4   24.47    1.82
   0  -1  -4   26.80    1.76
   0   1   4   25.42    1.82
   0   1   4   24.50    1.55
   0   1   4   23.47    1.55
   0   1   4   27.20    1.76
   0   1  -4   26.95    1.87
   0   1  -4   29.92    1.93
   0   1  -4   26.76    1.70
   0  -1   4   25.41    1.87
   0  -1   4   29.05    1.92
   0  -1   4   27.57    1.70
   0   2  -4   78.49    5.14
   0   2  -4   70.74    4.55
   0   2  -4   70.69    5.01
   0  -2   4   77.26    5.14
   0  -2   4   75.45    4.55
   0   3  -4   25.07    1.52
   0   3  -4   21.24    1.69
   0   3  -4   19.71    1.44
   0  -3   4   19.96    1.43
   0  -3   4   20.81    1.67
   0  -3   4   18.35    1.62
   0   4  -4    2.65    0.83
   0  -4   4    3.88    0.61
   0  -4   4    2.80    0.55
   0   5  -4    2.03    0.85
   0  -5   4   -0.07    0.58
   0  -5   4    0.03    0.56
   0   6  -4    2.98    1.09
   0  -6   4    3.31    0.78
   0  -7   4    3.83    0.90
   0  -8   4    1.28    0.87
  -1  -7  -4    1.77    0.91
  -1  -6  -4    5.84    0.93
   1   6   4    9.62    1.54
  -1  -5  -4   -0.48    0.65
  -1  -5  -4    0.74    0.63
  -1  -4  -4    1.75    0.59
  -1  -4  -4    2.96    0.61
   1   4   4    2.37    0.65
   1   4   4    2.18    1.00
  -1  -3  -4   13.56    1.07
  -1  -3  -4   16.34    1.43
  -1  -3  -4   12.97    1.18
   1   3   4   14.16    1.05
   1   3   4   16.37    1.44
   1   3   4   13.34    1.41
   1   3   4   12.79    1.02
   1   3   4   14.34    1.22
  -1  -2  -4   46.84    2.93
  -1  -2  -4   47.99    2.93
  -1  -2  -4   50.96    3.37
  -1  -2  -4   42.36    3.44
  -1  -2  -4   48.55    3.36
   1   2   4   47.68    3.45
   1   2   4   42.84    2.92
   1   2   4   46.32    3.35
   1   2   4   55.01    3.38
   1   2   4   48.14    2.93
  -1  -1  -4   37.88    2.21
  -1  -1  -4   35.05    2.21
  -1  -1  -4   35.81    2.49
   1   1   4   35.21    2.20
   1   1   4   33.95    2.49
   1   1   4   37.37    2.20
  -1   0  -4   17.47    1.00
  -1   0  -4   16.04    1.12
   1   0   4   14.49    1.12
  -1   1  -4   33.82    2.18
  -1   1  -4   35.50    2.40
  -1   1  -4   36.60    2.46
   1  -1   4   34.04    2.40
   1  -1   4   37.13    2.46
   1  -1   4   36.54    2.18
  -1   2  -4   49.37    3.01
  -1   2  -4   47.69    3.29
  -1   2  -4   49.08    3.40
   1  -2   4   47.15    3.00
   1  -2   4   50.94    3.40
   1  -2   4   47.98    3.29
  -1   3  -4   15.73    1.05
  -1   3  -4   12.69    1.22
  -1   3  -4   12.40    1.03
   1  -3   4   13.03    1.21
   1  -3   4   12.13    1.02
  -1   4  -4    2.37    0.78
   1  -4   4    3.23    0.60
  -1   5  -4    1.21    0.84
   1  -5   4    1.47    0.56
   1  -5   4    2.31    0.61
  -1   6  -4    7.28    1.17
   1  -6   4    5.39    0.81
   1  -7   4    1.72    0.86
   1  -8   4    2.28    0.96
  -2  -8  -4    2.91    1.05
  -2  -7  -4    0.54    0.92
   2   7   4    1.29    0.93
  -2  -6  -4    1.22    0.78
   2   6   4    1.08    1.34
   2   6   4    1.51    0.79
  -2  -5  -4    2.12    0.66
  -2  -5  -4    1.78    0.66
   2   5   4    3.24    0.73
   2   5   4    3.41    1.17
  -2  -4  -4    1.67    0.58
  -2  -4  -4    2.22    0.61
   2   4   4    2.12    0.65
   2   4   4    2.49    0.62
   2   4   4    3.71    1.04
  -2  -3  -4    3.70    0.58
  -2  -3  -4    3.51    0.86
  -2  -3  -4    3.10    0.59
   2   3   4    3.93    0.56
   2   3   4    3.52    0.87
   2   3   4    3.79    0.61
   2   3   4    5.09    0.98
   2   3   4    4.74    0.59
  -2  -2  -4    6.47    0.64
  -2  -2  -4    5.41    0.56
  -2  -2  -4    4.86    0.73
  -2  -2  -4    5.54    0.59
  -2  -2  -4    4.33    0.81
   2   2   4    4.38    0.74
   2   2   4    7.37    0.66
   2   2   4    6.49    0.83
   2   2   4    8.01    0.59
   2   2   4    7.04    0.58
  -2  -1  -4    5.17    0.43
  -2  -1  -4    4.94    0.50
  -2  -1  -4    5.27    0.42
   2   1   4    5.52    0.42
   2   1   4    4.27    0.48
   2   1   4    5.43    0.42
  -2   0  -4    1.11    0.21
  -2   0  -4    1.20    0.19
   2   0   4    1.03    0.19
   2   0   4    1.24    0.19
  -2   1  -4    5.32    0.42
  -2   1  -4    4.71    0.40
  -2   1  -4    5.64    0.45
   2  -1   4    4.60    0.40
   2  -1   4    4.76    0.41
   2  -1   4    5.54    0.44
  -2   2  -4   10.24    0.66
   2  -2   4    7.65    0.64
   2  -2   4    7.05    0.73
   2  -2   4    6.75    0.65
  -2   3  -4    5.98    0.56
  -2   3  -4    3.88    0.58
  -2   3  -4    3.66    0.68
   2  -3   4    3.20    0.69
   2  -3   4    3.76    0.58
  -2   4  -4    2.58    0.72
   2  -4   4    2.66    0.61
  -2   5  -4    2.56    0.86
   2  -5   4    3.17    0.65
  -2   6  -4    0.07    0.96
   2  -6   4   -0.05    0.66
   2  -7   4    0.84    0.76
  -3  -7  -4    1.30    0.91
  -3  -6  -4    2.58    0.84
   3   6   4    4.38    1.43
   3   6   4    4.55    0.92
  -3  -5  -4    1.35    0.65
  -3  -5  -4    2.10    0.71
   3   5   4    1.19    0.70
   3   5   4    1.05    1.16
  -3  -4  -4    6.81    0.74
  -3  -4  -4    5.50    0.77
   3   4   4    6.94    1.22
   3   4   4    5.29    0.80
   3   4   4    5.89    0.75
  -3  -3  -4    0.85    0.53
  -3  -3  -4    1.10    0.48
  -3  -3  -4    1.00    0.51
   3   3   4    1.79    0.58
   3   3   4    3.45    0.92
   3   3   4    0.76    0.53
   3   3   4    1.46    0.51
  -3  -2  -4   72.13    4.83
  -3  -2  -4   68.06    4.24
  -3  -2  -4   72.26    4.83
  -3  -2  -4   68.75    4.24
   3   2   4   68.01    4.23
   3   2   4   67.08    4.24
   3   2   4   67.08    4.82
   3   2   4   64.87    4.97
   3   2   4   72.68    4.85
  -3  -1  -4    8.45    0.66
  -3  -1  -4    7.67    0.77
   3   1   4    9.81    0.66
   3   1   4   10.37    0.67
   3   1   4    8.02    0.75
  -3   0  -4  137.52    9.64
  -3   0  -4  143.83    8.56
   3   0   4  144.81    8.57
   3   0   4  138.83    9.64
  -3   1  -4    9.38    0.70
  -3   1  -4    9.71    0.76
  -3   1  -4   10.04    0.72
   3  -1   4    9.97    0.76
   3  -1   4    9.84    0.69
   3  -1   4   10.17    0.72
  -3   2  -4   63.59    4.42
  -3   2  -4   65.68    4.03
  -3   2  -4   65.67    4.53
   3  -2   4   68.50    4.53
   3  -2   4   67.06    4.03
   3  -2   4   63.14    4.42
  -3   3  -4    0.97    0.49
  -3   3  -4    1.08    0.55
  -3   3  -4    2.81    0.41
   3  -3   4    1.74    0.50
   3  -3   4    0.48    0.57
  -3   4  -4    6.36    0.68
  -3   4  -4    5.86    0.81
   3  -4   4    5.94    0.71
  -3   5  -4    0.74    0.73
   3  -5   4    0.41    0.61
  -3   6  -4    4.22    0.95
   3  -6   4    1.68    0.74
   3  -7   4    0.72    0.78
   3  -8   4    2.25    0.92
  -4  -7  -4    3.84    0.99
   4   7   4    1.99    0.99
  -4  -6  -4    1.53    0.81
   4   6   4    4.64    1.46
   4   6   4    2.33    0.86
  -4  -5  -4    1.78    0.66
   4   5   4    2.11    0.71
   4   5   4    1.63    1.24
   4   5   4    2.05    0.77
  -4  -4  -4    3.26    0.62
  -4  -4  -4    2.56    0.63
   4   4   4    3.40    0.65
   4   4   4    3.63    1.13
   4   4   4    4.33    0.74
  -4  -3  -4    7.19    0.75
  -4  -3  -4    6.09    0.69
   4   3   4    7.46    1.11
   4   3   4    6.82    0.72
   4   3   4    6.82    0.83
   4   3   4    6.52    0.75
  -4  -2  -4   27.46    2.09
  -4  -2  -4   25.87    1.75
  -4  -2  -4   26.41    1.76
  -4  -2  -4   26.39    2.07
   4   2   4   28.95    2.12
   4   2   4   29.06    1.77
   4   2   4   23.67    2.07
   4   2   4   26.41    1.75
  -4  -1  -4    2.89    0.40
  -4  -1  -4    2.67    0.47
   4   1   4    2.89    0.41
   4   1   4    3.40    0.42
   4   1   4    3.48    0.50
   4   1   4    2.31    0.42
  -4   0  -4    5.05    0.49
  -4   0  -4    4.94    0.52
   4   0   4    5.82    0.52
   4   0   4    5.91    0.49
   4   0   4    5.95    0.47
  -4   1  -4    3.54    0.41
  -4   1  -4    3.57    0.41
  -4   1  -4    2.84    0.36
   4  -1   4    3.25    0.34
   4  -1   4    3.30    0.38
   4  -1   4    3.34    0.40
  -4   2  -4   25.23    1.63
  -4   2  -4   25.33    1.75
  -4   2  -4   25.31    1.81
   4  -2   4   24.99    1.74
   4  -2   4   24.85    1.81
   4  -2   4   24.27    1.63
  -4   3  -4    5.35    0.71
  -4   3  -4    6.64    0.66
  -4   3  -4    5.09    0.62
   4  -3   4    6.15    0.73
   4  -3   4    5.70    0.64
  -4   4  -4    2.63    0.49
  -4   4  -4    2.89    0.65
   4  -4   4    2.90    0.58
  -4   5  -4    2.00    0.73
   4  -5   4    0.79    0.60
  -4   6  -4    2.03    0.85
   4  -6   4    1.61    0.72
  -4   7  -4    3.38    1.08
   4  -7   4    1.71    0.86
   4  -8   4    1.42    0.94
  -5  -8  -4    1.42    1.02
  -5  -7  -4    1.89    0.88
   5   7   4    1.72    0.98
   5   7   4    2.17    1.76
  -5  -6  -4    4.20    0.86
   5   6   4    4.62    0.88
   5   6   4    5.48    1.54
  -5  -5  -4    1.05    0.68
   5   5   4    3.38    1.29
   5   5   4    1.92    0.74
  -5  -4  -4    9.99    0.94
   5   4   4   11.99    1.44
   5   4   4   10.04    1.14
   5   4   4   10.56    0.96
  -5  -3  -4    1.59    0.56
   5   3   4    3.47    0.69
   5   3   4    2.84    0.63
   5   3   4    4.40    0.99
  -5  -2  -4   10.48    0.88
  -5  -2  -4    9.81    1.15
  -5  -2  -4   10.19    0.88
  -5  -2  -4    9.92    1.18
   5   2   4   11.90    1.23
   5   2   4    9.30    1.11
   5   2   4   10.29    0.89
   5   2   4   11.33    0.92
  -5  -1  -4    2.74    0.52
  -5  -1  -4    2.24    0.42
   5   1   4    1.05    0.47
   5   1   4    0.79    0.52
   5   1   4    1.53    0.43
   5   1   4    2.73    0.44
  -5   0  -4   52.45    3.74
  -5   0  -4   55.55    3.34
   5   0   4   51.16    3.73
   5   0   4   52.99    3.33
   5   0   4   57.24    3.65
  -5   1  -4    2.12    0.40
  -5   1  -4    2.84    0.42
  -5   1  -4    2.58    0.38
   5  -1   4    2.12    0.39
   5  -1   4    2.20    0.41
   5  -1   4    1.79    0.33
  -5   2  -4   10.70    0.81
  -5   2  -4    9.72    0.85
  -5   2  -4   11.49    0.83
   5  -2   4    8.90    0.81
   5  -2   4    8.62    0.86
   5  -2   4   10.21    0.81
  -5   3  -4    1.36    0.51
  -5   3  -4    2.72    0.46
   5  -3   4    2.15    0.55
   5  -3   4    1.74    0.54
  -5   4  -4    9.39    0.95
  -5   4  -4    9.53    0.84
   5  -4   4    9.59    0.86
  -5   5  -4    2.04    0.74
  -5   5  -4    2.09    0.56
   5  -5   4    2.02    0.65
   5  -6   4    3.40    0.85
   5  -7   4    1.23    0.87
   5  -8   4   -0.73    0.91
  -6  -7  -4    1.41    0.93
   6   7   4    3.64    1.03
  -6  -6  -4    2.22    0.81
   6   6   4    1.83    0.86
   6   6   4    4.13    1.49
  -6  -5  -4    5.65    0.82
   6   5   4    7.02    0.89
   6   5   4    6.40    1.43
  -6  -4  -4    5.30    0.75
   6   4   4    6.55    1.25
   6   4   4    6.07    0.80
  -6  -3  -4    6.72    0.76
   6   3   4    7.04    0.91
   6   3   4    6.87    1.16
   6   3   4    7.41    0.82
  -6  -2  -4   10.34    0.94
  -6  -2  -4   10.39    0.94
  -6  -2  -4   11.13    1.21
   6   2   4   12.16    1.29
   6   2   4   12.69    0.98
   6   2   4   11.18    0.97
  -6  -1  -4   14.71    1.04
  -6  -1  -4   14.46    1.20
   6   1   4   13.79    1.16
   6   1   4   13.50    1.06
   6   1   4   15.26    1.06
   6   1   4   11.12    1.19
  -6   0  -4   48.02    3.02
  -6   0  -4   48.63    3.38
   6   0   4   50.42    3.29
   6   0   4   45.24    3.01
   6   0   4   48.97    3.38
  -6   1  -4   14.18    1.08
  -6   1  -4   12.62    0.99
  -6   1  -4   13.65    1.03
   6  -1   4   12.66    0.99
   6  -1   4   13.97    1.06
   6  -1   4   13.36    1.03
  -6   2  -4   10.46    0.91
  -6   2  -4   10.70    0.86
  -6   2  -4   10.59    0.87
   6  -2   4   10.57    0.85
   6  -2   4   10.11    0.90
   6  -2   4   10.76    0.89
  -6   3  -4    7.12    0.72
  -6   3  -4    6.84    0.66
   6  -3   4    6.02    0.72
   6  -3   4    5.30    0.72
  -6   4  -4    6.59    0.69
  -6   4  -4    5.30    0.78
   6  -4   4    6.80    0.76
  -6   5  -4    6.58    0.94
  -6   5  -4    7.14    0.78
   6  -5   4    7.28    0.88
  -6   6  -4    3.50    0.91
  -6   6  -4    3.67    0.66
   6  -6   4    1.67    0.79
   6  -7   4    2.23    0.88
  -7  -7  -4    1.17    0.91
   7   7   4    1.68    1.01
  -7  -6  -4    2.55    0.77
   7   6   4    1.70    1.53
   7   6   4    3.17    0.88
  -7  -5  -4    2.16    0.76
   7   5   4    2.56    1.37
   7   5   4    2.27    0.79
  -7  -4  -4   13.68    1.19
   7   4   4   16.85    1.71
   7   4   4   15.00    1.45
   7   4   4   13.29    1.19
  -7  -3  -4    7.56    0.80
   7   3   4    7.72    0.82
   7   3   4    7.27    1.17
  -7  -2  -4   12.19    1.06
  -7  -2  -4   11.83    1.35
   7   2   4   13.64    1.09
   7   2   4   14.38    1.11
   7   2   4   13.58    1.42
  -7  -1  -4    7.30    0.89
  -7  -1  -4    8.72    0.79
   7   1   4    9.03    0.83
   7   1   4    7.27    0.91
   7   1   4    9.29    0.82
   7   1   4    7.32    0.88
  -7   0  -4    4.17    0.55
  -7   0  -4    5.05    0.62
   7   0   4    3.57    0.48
   7   0   4    3.11    0.54
   7   0   4    3.57    0.56
  -7   1  -4    6.68    0.73
  -7   1  -4    7.17    0.74
  -7   1  -4    7.05    0.77
   7  -1   4    7.89    0.74
   7  -1   4    7.48    0.72
   7  -1   4    8.35    0.72
  -7   2  -4   11.20    0.95
  -7   2  -4   12.04    0.98
  -7   2  -4   12.40    0.92
   7  -2   4   12.07    0.95
   7  -2   4   11.64    0.92
   7  -2   4    9.94    0.94
  -7   3  -4    6.17    0.70
  -7   3  -4    6.52    0.72
   7  -3   4    7.35    0.77
   7  -3   4    8.72    0.79
  -7   4  -4   11.48    0.99
  -7   4  -4   11.87    1.05
   7  -4   4   12.81    1.04
  -7   5  -4    3.07    0.60
  -7   5  -4    1.97    0.74
   7  -5   4    2.63    0.71
  -7   6  -4    4.32    0.72
   7  -6   4    3.17    0.86
   7  -7   4    2.49    1.00
   7  -8   4    0.21    1.00
  -8  -8  -4    2.33    1.00
  -8  -7  -4    0.62    0.95
   8   7   4    2.78    1.10
  -8  -6  -4    1.95    0.89
   8   6   4    5.45    1.01
  -8  -5  -4    2.58    0.74
   8   5   4    3.53    0.83
   8   5   4    2.79    1.41
  -8  -4  -4    3.97    0.74
   8   4   4    4.72    1.27
   8   4   4    4.95    0.81
  -8  -3  -4    3.53    0.67
   8   3   4    4.73    1.05
   8   3   4    5.23    0.74
  -8  -2  -4    1.55    0.82
   8   2   4    1.76    0.62
   8   2   4    1.35    0.91
  -8  -1  -4    1.90    0.51
  -8  -1  -4    1.23    0.65
   8   1   4    1.62    0.68
   8   1   4    0.76    0.52
  -8   0  -4    5.62    0.67
  -8   0  -4    6.24    0.66
  -8   0  -4    6.97    0.76
   8   0   4    6.09    0.69
   8   0   4    6.07    0.68
   8   0   4    5.94    0.70
  -8   1  -4    1.69    0.52
  -8   1  -4    2.22    0.53
  -8   1  -4    2.23    0.46
   8  -1   4    2.12    0.48
   8  -1   4    1.61    0.51
   8  -1   4    1.84    0.43
  -8   2  -4    1.59    0.45
  -8   2  -4    2.11    0.48
   8  -2   4    1.12    0.54
   8  -2   4    1.73    0.41
   8  -2   4    0.80    0.45
  -8   3  -4    4.41    0.62
  -8   3  -4    4.57    0.57
   8  -3   4    4.27    0.52
   8  -3   4    5.90    0.70
   8  -3   4    3.96    0.59
  -8   4  -4    3.48    0.68
  -8   4  -4    4.55    0.60
   8  -4   4    4.13    0.72
  -8   5  -4    3.41    0.75
  -8   5  -4    2.59    0.61
   8  -5   4    2.70    0.74
  -8   6  -4    3.38    0.74
   8  -6   4    2.41    0.82
   8  -7   4    2.66    0.96
   8  -8   4    1.25    1.02
  -9  -7  -4    4.04    1.07
   9   7   4    2.14    1.09
  -9  -6  -4    4.68    0.95
   9   6   4    4.57    1.03
   9   6   4    3.97    1.77
  -9  -5  -4    2.19    0.75
   9   5   4    2.52    1.46
   9   5   4    5.46    0.91
  -9  -4  -4    5.67    0.79
   9   4   4    6.52    1.37
   9   4   4    6.37    0.86
  -9  -3  -4   11.32    1.01
   9   3   4   10.72    1.40
   9   3   4   12.65    1.07
  -9  -2  -4    7.79    1.19
   9   2   4   11.89    0.99
   9   2   4   10.60    1.30
  -9  -1  -4    5.35    0.83
   9   1   4    3.77    0.81
   9   1   4    4.99    0.60
   9   1   4    3.81    0.66
  -9   0  -4    6.10    0.78
  -9   0  -4    5.88    0.67
   9   0   4    6.14    0.71
   9   0   4    5.20    0.68
   9   0   4    4.72    0.61
  -9   1  -4    5.42    0.68
  -9   1  -4    5.14    0.60
   9  -1   4    4.30    0.57
   9  -1   4    3.85    0.64
   9  -1   4    4.65    0.60
  -9   2  -4    9.37    0.90
  -9   2  -4   12.44    0.89
   9  -2   4    7.34    0.88
   9  -2   4    9.40    0.85
   9  -2   4    9.09    0.88
  -9   3  -4   12.68    1.05
  -9   3  -4   12.79    1.07
   9  -3   4   13.45    1.04
   9  -3   4   12.21    1.01
   9  -3   4   11.72    1.06
  -9   4  -4    6.65    0.85
  -9   4  -4    8.30    0.80
   9  -4   4    6.42    0.86
  -9   5  -4    4.52    0.67
  -9   5  -4    2.91    0.78
   9  -5   4    3.77    0.85
  -9   6  -4    6.10    0.86
   9  -6   4    4.44    0.97
   9  -7   4    1.86    0.97
 -10  -7  -4    0.31    0.90
  10   7   4    1.92    1.10
 -10  -6  -4    1.86    0.88
  10   6   4    2.11    1.00
 -10  -5  -4    1.49    0.72
  10   5   4    2.79    0.84
  10   5   4    1.07    1.54
 -10  -4  -4    7.27    0.90
  10   4   4    7.18    1.53
  10   4   4    6.34    0.98
 -10  -3  -4    6.67    0.84
  10   3   4    8.71    0.92
  10   3   4    6.81    1.23
 -10  -2  -4   14.14    1.41
  10   2   4   13.13    1.53
  10   2   4   13.11    1.14
 -10  -1  -4   12.09    1.23
  10   1   4   12.76    1.26
  10   1   4   12.31    1.09
  10   1   4   13.61    1.12
 -10   0  -4    3.19    0.69
 -10   0  -4    4.06    0.54
  10   0   4    4.27    0.56
  10   0   4    4.62    0.65
 -10   1  -4   12.73    1.04
 -10   1  -4   12.12    1.09
  10  -1   4   11.82    1.02
  10  -1   4   11.27    1.02
  10  -1   4   11.17    0.99
 -10   2  -4   12.86    1.06
 -10   2  -4   13.28    1.11
  10  -2   4   11.90    1.08
  10  -2   4   13.49    1.07
  10  -2   4   12.57    1.04
 -10   3  -4    9.10    0.83
 -10   3  -4    8.37    0.86
  10  -3   4    6.84    0.79
  10  -3   4    7.90    0.87
 -10   4  -4    6.71    0.84
 -10   4  -4    6.69    0.76
  10  -4   4    6.97    0.90
 -10   5  -4    2.51    0.64
 -10   5  -4    2.56    0.74
  10  -5   4    1.19    0.75
 -10   6  -4    3.33    0.76
 -10   6  -4    2.27    0.88
  10  -6   4    1.91    0.91
  10  -7   4    1.37    1.00
 -11  -8  -4    2.18    1.05
  11   7   4    1.99    1.13
 -11  -6  -4    1.40    0.90
  11   6   4    5.11    1.08
 -11  -5  -4    5.39    0.94
  11   5   4    5.92    1.03
 -11  -4  -4    3.18    0.72
  11   4   4    2.85    1.33
  11   4   4    2.87    0.83
 -11  -3  -4    5.75    0.81
  11   3   4    6.40    0.89
  11   3   4    6.05    1.26
 -11  -2  -4    1.89    0.96
  11   2   4    3.32    0.66
  11   2   4    4.64    1.06
 -11  -1  -4    4.28    0.86
  11   1   4    5.38    0.89
  11   1   4    5.29    0.69
  11   1   4    4.37    0.68
 -11   0  -4    2.47    0.68
 -11   0  -4    1.33    0.46
  11   0   4    1.36    0.47
  11   0   4    2.52    0.61
 -11   1  -4    4.01    0.60
 -11   1  -4    4.12    0.72
  11  -1   4    4.92    0.58
  11  -1   4    5.03    0.70
 -11   2  -4    3.38    0.57
 -11   2  -4    3.44    0.68
  11  -2   4    2.47    0.47
  11  -2   4    3.62    0.69
 -11   3  -4    8.19    0.82
 -11   3  -4    5.81    0.84
  11  -3   4    6.23    0.88
 -11   4  -4    3.44    0.66
 -11   4  -4    3.88    0.72
  11  -4   4    3.59    0.85
 -11   5  -4    6.19    0.90
 -11   5  -4    5.60    0.80
  11  -5   4    6.04    0.98
 -11   6  -4    3.41    0.81
  11  -6   4    1.79    0.93
  11  -7   4    2.29    1.03
 -12  -7  -4    2.61    1.02
  12   7   4    2.91    1.18
 -12  -6  -4    2.08    0.91
  12   6   4    2.02    1.05
 -12  -5  -4    3.61    0.87
  12   5   4    2.07    0.99
 -12  -4  -4    5.62    0.83
  12   4   4    5.50    0.92
  12   4   4    4.89    1.48
  12   3   4    5.70    0.89
  12   3   4    5.55    1.28
 -12  -2  -4   -0.32    0.96
  12   2   4    3.04    1.06
  12   2   4    1.40    0.47
  12   2   4    0.74    0.63
 -12  -1  -4    7.07    1.00
  12   1   4    6.35    0.80
  12   1   4    6.20    0.79
  12   1   4    6.05    1.02
 -12   0  -4    5.47    0.85
 -12   0  -4    4.10    0.60
  12   0   4    5.07    0.75
  12   0   4    4.13    0.61
  12   0   4    4.77    0.83
 -12   1  -4    6.41    0.74
 -12   1  -4    7.61    0.89
  12  -1   4    6.86    0.80
  12  -1   4    5.79    0.69
 -12   2  -4    1.29    0.65
 -12   2  -4    1.79    0.57
  12  -2   4    1.10    0.67
 -12   3  -4    6.79    0.87
 -12   3  -4    6.31    0.80
  12  -3   4    7.53    0.96
 -12   4  -4    7.11    0.91
 -12   4  -4    6.57    0.81
  12  -4   4    6.01    0.96
 -12   5  -4    4.60    0.78
 -12   5  -4    4.17    0.90
  12  -5   4    4.89    0.97
 -12   6  -4    1.96    0.79
 -12   7  -4    2.18    0.87
 -13  -6  -4    2.06    0.97
 -13  -5  -4    1.11    0.79
  13   5   4    0.37    0.93
 -13  -4  -4    5.99    0.92
  13   4   4    5.07    1.00
  13   3   4    3.62    0.83
  13   3   4    4.00    1.27
 -13  -2  -4    7.51    1.38
  13   2   4    8.04    1.47
  13   2   4   11.92    1.16
  13   2   4   12.17    1.05
 -13  -1  -4    3.46    0.97
  13   1   4    3.22    0.74
  13   1   4    4.63    0.73
  13   1   4    3.83    1.01
 -13   0  -4   38.47    2.76
 -13   0  -4   37.58    2.58
  13   0   4   33.85    2.43
  13   0   4   36.54    2.74
  13   0   4   35.52    2.59
 -13   1  -4    3.14    0.79
 -13   1  -4    3.97    0.65
  13  -1   4    4.26    0.76
  13  -1   4    3.24    0.58
 -13   2  -4    8.93    1.10
 -13   2  -4   10.95    1.03
  13  -2   4   10.80    1.09
 -13   3  -4    5.08    0.83
 -13   3  -4    4.88    0.74
  13  -3   4    4.91    0.87
 -13   4  -4    6.51    0.96
 -13   4  -4    5.65    0.83
  13  -4   4    7.30    1.04
 -13   5  -4    2.05    0.76
 -13   5  -4    1.91    0.86
  13  -5   4    1.53    0.91
 -13   6  -4    2.79    0.83
 -13   7  -4    1.06    0.88
 -14  -6  -4    1.98    0.94
  14   6   4    1.75    1.10
 -14  -5  -4    2.83    0.89
  14   5   4    2.39    1.05
  14   4   4    0.59    0.91
  14   4   4    1.86    1.54
  14   3   4   -0.80    1.27
  14   3   4    1.81    0.82
 -14  -2  -4    5.22    1.19
  14   2   4    5.09    0.85
  14   2   4    5.29    1.23
  14   2   4    4.53    0.76
 -14  -1  -4    4.53    1.09
  14   1   4    5.21    0.84
  14   1   4    4.67    0.80
  14   1   4    4.47    1.09
 -14   0  -4    4.44    0.64
 -14   0  -4    2.22    0.92
  14   0   4    5.00    0.95
  14   0   4    4.86    0.83
  14   0   4    4.34    0.64
 -14   1  -4    4.59    0.72
 -14   1  -4    4.33    0.90
  14  -1   4    4.16    0.82
 -14   2  -4    4.87    0.88
 -14   2  -4    5.21    0.76
  14  -2   4    5.54    0.92
 -14   3  -4    2.08    0.66
 -14   3  -4    2.48    0.79
  14  -3   4    1.64    0.85
 -14   4  -4    2.88    0.77
 -14   4  -4    2.73    0.90
  14  -4   4    3.53    0.99
 -14   5  -4    1.55    0.80
  14  -5   4    3.15    1.02
 -14   6  -4    2.03    0.86
  14  -6   4    0.88    1.04
  15   6   4    1.18    1.13
 -15  -5  -4    2.53    0.90
  15   5   4    2.85    1.11
  15   4   4   -0.38    1.58
  15   4   4    1.43    0.97
  15   3   4    5.48    0.98
 -15  -2  -4    2.49    1.19
  15   2   4    3.20    0.74
  15   2   4    3.55    0.86
  15   2   4    2.81    1.26
 -15  -1  -4    2.33    1.04
  15   1   4    1.83    0.74
  15   1   4    3.40    1.12
  15   1   4    1.89    0.80
 -15   0  -4   12.00    1.33
 -15   0  -4    9.08    1.01
  15   0   4   11.59    1.32
  15   0   4   11.07    1.12
 -15   1  -4    1.97    0.66
 -15   1  -4    1.57    0.88
  15  -1   4    1.83    0.78
 -15   2  -4    3.11    0.70
 -15   2  -4    1.06    0.83
  15  -2   4    2.37    0.84
 -15   3  -4    3.19    0.90
 -15   3  -4    4.64    0.80
  15  -3   4    5.00    1.00
 -15   4  -4    2.39    0.78
 -15   4  -4    3.62    0.93
  15  -4   4    2.16    1.03
 -15   5  -4    3.35    0.86
  15  -5   4    2.68    1.12
 -15   6  -4    1.67    0.87
 -16  -5  -4    3.63    1.00
  16   5   4    5.03    1.19
  16   4   4    1.18    1.05
  16   3   4    2.63    0.68
  16   3   4    4.53    1.01
 -16  -2  -4   -0.02    1.26
  16   2   4    2.01    0.77
  16   2   4    1.40    0.91
  16   2   4   -1.48    1.27
 -16  -1  -4   12.73    1.61
  16   1   4   12.79    1.67
  16   1   4   13.28    1.34
 -16   0  -4    5.27    0.74
 -16   0  -4    6.15    1.15
  16   0   4    6.37    1.01
  16   0   4    6.62    1.17
 -16   1  -4   13.71    1.29
 -16   1  -4   13.14    1.48
  16  -1   4   14.02    1.30
  16  -1   4   12.42    1.42
 -16   2  -4    0.91    0.87
 -16   2  -4    1.77    0.72
  16  -2   4    0.45    0.87
 -16   3  -4    2.99    0.79
 -16   3  -4    1.57    0.95
  16  -3   4    4.04    1.03
 -16   4  -4    0.51    0.78
  16  -4   4    0.21    1.04
 -16   5  -4    4.14    0.94
 -16   6  -4    2.07    0.95
  17   5   4    0.46    1.11
  17   4   4    9.62    1.38
  17   3   4    2.04    1.04
 -17  -2  -4   16.32    1.92
  17   2   4   12.74    1.46
 -17  -1  -4    4.65    1.39
  17   1   4    4.45    1.07
 -17   0  -4   53.64    3.85
  17   0   4   49.69    3.39
  17   0   4   49.34    3.86
 -17   1  -4    5.26    1.17
 -17   1  -4    5.01    0.84
  17  -1   4    4.95    1.12
  17  -1   4    7.21    1.07
 -17   2  -4   14.53    1.41
  17  -2   4   14.32    1.42
 -17   3  -4    1.09    0.80
  17  -3   4    1.30    1.02
 -17   4  -4    9.20    1.12
  17  -4   4   10.47    1.39
 -17   5  -4    1.88    0.90
  17  -5   4    1.73    1.20
  18   5   4    1.94    1.20
  18   4   4   -0.65    1.08
  18   3   4    1.48    1.08
  18   3   4    0.97    1.60
  18   2   4    2.25    1.06
 -18  -1  -4    2.88    1.35
  18   1   4    4.31    1.06
  18   1   4    3.18    1.43
 -18   0  -4    4.11    1.31
  18   0   4    3.12    1.05
 -18   1  -4    4.31    0.83
  18  -1   4    5.89    1.09
 -18   2  -4    0.59    0.79
  18  -2   4    2.14    1.02
 -18   3  -4    1.24    0.82
  18  -3   4    1.58    1.11
 -18   4  -4    1.57    0.88
  18  -4   4    2.49    1.18
 -18   5  -4    0.11    0.91
  19   4   4    0.11    1.18
  19   3   4    3.51    1.27
  19   2   4    8.40    1.30
  19   1   4    2.06    1.11
  19   0   4   20.16    1.75
 -19   1  -4    1.63    0.76
  19  -1   4    2.61    1.06
 -19   2  -4    7.28    1.11
  19  -2   4   11.17    1.34
 -19   3  -4    2.68    0.93
  19  -3   4    3.68    1.21
 -19   4  -4   -0.11    0.89
 -19   5  -4    2.31    0.96
  20   3   4    4.84    1.32
  20   2   4    0.29    1.12
  20   1   4    5.35    1.27
  20   0   4    2.85    1.19
 -20   1  -4    2.55    0.83
  20  -1   4    3.36    1.15
 -20   2  -4    0.08    0.86
  20  -2   4    1.71    1.11
 -20   3  -4    3.45    0.96
  20  -3   4    3.15    1.25
 -20   4  -4    1.62    0.95
  21   3   4    3.10    1.32
  21   2   4    3.27    1.22
  21   1   4    0.06    1.12
  21   0   4    8.19    1.38
  21  -1   4    0.97    1.13
 -21   2  -4    4.09    1.01
  21  -2   4    6.50    1.26
 -21   3  -4    2.18    0.95
  21  -3   4    2.89    1.27
  22   2   4    1.44    1.23
  22   1   4    4.02    1.29
  22   0   4    5.13    1.32
  22  -1   4    4.89    1.28
  22  -2   4    3.47    1.23
 -22   2   5    1.72    0.97
  22  -1  -5    3.63    1.11
 -22   1   5    2.25    0.96
  22   0  -5    2.21    1.06
  22   1  -5    1.45    1.08
  22   2  -5    2.82    1.16
 -21   3   5    0.03    0.93
 -21   2   5    3.15    0.99
  21  -1  -5    1.70    1.02
 -21   1   5    2.59    0.92
  21   0  -5    9.37    1.28
  21   1  -5    0.64    1.04
  21   2  -5    3.91    1.16
  21   3  -5    0.72    1.18
 -20   4   5    2.76    0.97
 -20   3   5    4.40    1.02
 -20   2   5    4.99    1.04
  20  -1  -5   14.68    1.40
 -20   1   5   11.33    1.34
  20   0  -5    7.65    1.17
  20   1  -5   14.22    1.48
  20   2  -5    7.70    1.28
  20   3  -5    6.04    1.27
  20   4  -5    3.39    1.22
 -19   4   5    2.59    0.97
 -19   3   5    1.80    0.90
  19  -2  -5    9.31    1.18
 -19   2   5    7.56    1.13
  19  -1  -5    2.61    0.96
 -19   1   5    2.90    0.87
  19   0  -5    9.78    1.19
  19   1  -5    3.08    1.00
  19   2  -5    9.59    1.32
  19   3  -5    1.11    1.08
 -18   5   5    0.54    0.91
 -18   4   5    2.78    0.90
 -18   3   5    1.19    0.82
  18  -2  -5    3.77    0.99
 -18   2   5    3.51    0.91
  18  -1  -5    3.39    0.90
 -18   1   5    2.13    0.81
  18   0  -5    8.96    1.13
  18   1  -5    3.30    0.93
  18   2  -5    5.55    1.10
  18   3  -5    0.57    1.02
 -18  -5   5    1.85    1.03
 -17   5   5    1.62    0.86
 -17   4   5    4.70    0.92
 -17   3   5    1.10    0.78
  17  -2  -5    7.75    1.00
 -17   2   5    4.76    0.93
  17  -1  -5    5.29    0.95
 -17   1   5    7.06    0.94
  17   0  -5   10.45    1.24
 -17   0   5   15.39    1.31
  17   1  -5    8.39    1.06
  17   2  -5    6.32    1.08
  17   3  -5    2.84    1.00
  17   4  -5    4.81    1.16
 -17  -5   5    3.03    1.00
 -17  -6   5    3.41    1.14
 -16   6   5    2.82    0.91
 -16   5   5    3.60    0.91
 -16   4   5    3.45    0.84
 -16   3   5    6.05    0.92
  16  -2  -5    2.92    0.83
 -16   2   5    1.61    0.74
  16  -1  -5   18.19    1.46
 -16   1   5   19.54    1.64
  16   0  -5    0.65    0.75
  16   0  -5    0.90    1.13
 -16   0   5    1.76    0.68
  16   1  -5   22.38    1.69
  16   1  -5   22.38    2.21
  16   2  -5    2.78    1.47
  16   2  -5    3.77    0.92
  16   3  -5    8.91    1.18
  16   4  -5    4.89    1.05
 -16  -4   5    3.85    0.97
  16   5  -5    2.56    1.07
 -16  -5   5    4.15    1.03
 -16  -6   5    2.75    1.07
 -15   6   5    1.05    0.82
 -15   5   5    5.62    0.92
 -15   4   5    6.79    0.91
  15  -3  -5    2.26    0.81
 -15   3   5    1.81    0.71
  15  -2  -5    4.62    0.84
 -15   2   5    3.98    0.76
  15  -1  -5    7.55    0.89
 -15   1   5    6.79    0.90
  15   0  -5    4.11    0.78
  15   0  -5    2.68    1.06
 -15   0   5    5.05    0.76
  15   1  -5    7.77    0.91
  15   1  -5    3.33    1.30
  15   2  -5    4.09    0.86
  15   2  -5    3.57    1.40
  15   3  -5    0.93    1.58
  15   3  -5    1.52    0.88
  15   4  -5    5.63    1.08
 -15  -4   5    7.38    1.01
  15   5  -5    6.52    1.14
 -15  -5   5    4.61    1.06
 -14   6   5    1.85    0.77
 -14   5   5    1.90    0.75
 -14   4   5    3.25    0.75
  14  -3  -5    6.15    0.89
 -14   3   5    4.41    0.75
  14  -2  -5    4.03    0.78
 -14   2   5    4.14    0.71
  14  -1  -5    9.04    0.91
 -14   1   5    8.59    0.96
  14   0  -5    2.19    0.67
  14   0  -5    0.58    0.92
 -14   0   5    2.80    0.65
  14   1  -5   11.30    1.45
  14   1  -5   11.63    1.11
  14   2  -5    2.66    1.29
  14   2  -5    2.73    0.77
  14   3  -5    6.12    1.62
  14   3  -5    5.49    0.93
 -14  -3   5    7.17    0.91
  14   4  -5    3.31    0.95
 -14  -4   5    3.34    0.88
  14   5  -5    1.62    0.99
 -14  -5   5    2.62    0.91
 -14  -6   5    2.06    1.03
 -14  -7   5   -0.32    1.02
 -13   5   5    2.60    0.70
 -13   4   5    7.91    0.88
  13  -3  -5    5.68    0.85
 -13   3   5    6.02    0.76
  13  -2  -5   21.99    1.48
 -13   2   5   18.96    1.60
  13  -1  -5    9.64    0.90
 -13   1   5    9.91    1.05
 -13   1   5   10.04    0.94
  13   0  -5   18.86    1.87
  13   0  -5   22.02    1.54
  13   0  -5   21.71    1.56
 -13   0   5   22.41    1.77
 -13   0   5   22.88    1.69
  13   1  -5   10.85    1.37
  13   1  -5   10.44    1.04
  13   2  -5   23.08    1.67
  13   2  -5   21.76    2.17
  13   2  -5   23.69    1.81
  13   3  -5    7.70    1.57
  13   3  -5    5.77    0.85
 -13  -3   5    4.08    0.78
  13   4  -5    6.78    1.02
  13   4  -5    7.73    1.75
 -13  -4   5    8.66    1.00
  13   5  -5    2.92    0.97
 -13  -5   5    2.82    0.88
 -13  -6   5    2.46    0.98
  12  -4  -5    3.37    0.86
 -12   4   5    4.62    0.67
  12  -3  -5    4.50    0.77
 -12   3   5    5.56    0.69
  12  -2  -5    3.91    0.66
 -12   2   5    2.88    0.59
 -12   2   5    2.90    0.64
  12  -1  -5    3.17    0.60
  12  -1  -5    2.69    0.47
 -12   1   5    3.77    0.59
 -12   1   5    3.52    0.60
  12   0  -5    1.68    0.81
  12   0  -5    1.81    0.55
  12   0  -5    0.80    0.45
  12   0  -5    0.30    0.58
 -12   0   5    1.78    0.54
 -12   0   5    1.99    0.70
 -12   0   5    0.97    0.48
  12   1  -5    1.04    0.98
  12   1  -5    2.02    0.64
  12   1  -5    1.42    0.58
  12   1  -5    2.88    0.62
  12   2  -5    3.41    1.24
  12   2  -5    4.62    0.76
  12   2  -5    3.19    0.62
  12   3  -5    5.16    1.43
  12   3  -5    6.29    0.84
 -12  -3   5    3.53    0.77
  12   4  -5    3.10    0.85
  12   4  -5    3.71    1.66
 -12  -4   5    3.94    0.79
  12   5  -5    1.24    0.88
 -12  -5   5    2.80    0.85
  12   6  -5    2.75    1.01
 -12  -6   5    1.95    0.99
  11  -4  -5    2.54    0.79
  11  -3  -5    8.45    0.92
 -11   3   5   10.19    0.90
  11  -2  -5    9.97    0.87
 -11   2   5    8.93    0.91
 -11   2   5    9.28    0.85
  11  -1  -5   12.84    0.96
  11  -1  -5   11.02    1.00
 -11   1   5   13.18    0.98
 -11   1   5   12.37    1.08
  11   0  -5    0.85    0.74
  11   0  -5    1.08    0.48
  11   0  -5    0.64    0.42
  11   0  -5    1.61    0.60
 -11   0   5    1.28    0.44
 -11   0   5    1.76    0.68
 -11   0   5    1.43    0.51
  11   1  -5   13.93    1.18
  11   1  -5   13.31    1.06
  11   1  -5   13.25    1.43
  11   1  -5   13.70    1.06
 -11  -1   5   12.20    1.03
  11   2  -5   12.44    1.48
  11   2  -5   10.22    0.97
  11   2  -5   11.74    1.01
 -11  -2   5   10.31    0.95
  11   3  -5    9.40    1.45
  11   3  -5    7.74    0.91
 -11  -3   5    9.00    0.90
  11   4  -5    3.57    1.39
  11   4  -5    3.99    0.80
 -11  -4   5    3.02    0.74
  11   5  -5    5.84    1.65
  11   5  -5    4.74    0.95
 -11  -5   5    5.55    0.92
  11   6  -5    3.27    0.99
 -11  -6   5    3.31    0.90
  11   7  -5    0.89    1.06
 -11  -7   5    1.79    0.97
  10  -4  -5    3.66    0.77
  10  -3  -5    5.15    0.75
 -10   3   5    6.62    0.68
 -10   3   5    5.62    0.67
  10  -2  -5   13.17    1.01
 -10   2   5   12.68    0.99
 -10   2   5   13.02    1.07
  10  -1  -5    7.22    0.72
  10  -1  -5    6.66    0.71
 -10   1   5    8.14    0.83
 -10   1   5    8.96    0.75
  10   0  -5    4.54    0.72
  10   0  -5    5.09    0.86
  10   0  -5    5.29    0.60
  10   0  -5    4.45    0.57
 -10   0   5    5.78    0.81
 -10   0   5    5.22    0.64
 -10   0   5    5.59    0.58
  10   1  -5    7.53    1.12
  10   1  -5    8.07    0.87
  10   1  -5    7.32    0.75
  10   1  -5    7.59    0.76
 -10  -1   5    7.14    0.71
 -10  -1   5    6.90    0.99
  10   2  -5   10.50    1.02
  10   2  -5   12.20    0.99
  10   2  -5   12.29    1.45
 -10  -2   5   11.67    1.01
 -10  -2   5   12.84    0.97
  10   3  -5    4.79    0.75
  10   3  -5    5.06    1.28
 -10  -3   5    5.32    0.71
  10   4  -5    3.53    1.30
  10   4  -5    2.59    0.74
 -10  -4   5    2.37    0.71
  10   5  -5    2.54    0.86
  10   5  -5    3.43    1.63
 -10  -5   5    2.51    0.76
  10   6  -5    1.65    0.91
 -10  -6   5    1.19    0.83
  -9   7   5    2.76    0.73
   9  -4  -5    9.66    0.96
   9  -3  -5    8.18    0.83
  -9   3   5    7.65    0.75
   9  -2  -5   23.18    1.50
  -9   2   5   21.88    1.62
  -9   2   5   22.40    1.49
   9  -1  -5    2.86    0.43
   9  -1  -5    3.20    0.49
  -9   1   5    3.56    0.53
  -9   1   5    4.04    0.50
   9   0  -5   52.29    3.58
   9   0  -5   50.64    3.24
   9   0  -5   55.21    3.71
  -9   0   5   53.53    3.60
  -9   0   5   48.58    3.24
  -9   0   5   53.45    3.71
   9   1  -5    2.74    0.54
   9   1  -5    2.97    0.55
   9   1  -5    3.44    0.58
   9   1  -5    2.40    0.91
  -9  -1   5    3.64    0.82
  -9  -1   5    2.58    0.49
   9   2  -5   22.29    1.73
   9   2  -5   24.26    1.71
   9   2  -5   25.60    2.16
  -9  -2   5   27.00    1.72
  -9  -2   5   28.96    1.72
   9   3  -5    5.56    1.21
   9   3  -5    5.08    0.75
  -9  -3   5    6.20    0.71
   9   4  -5   11.00    1.02
   9   4  -5    9.69    1.53
  -9  -4   5    9.54    0.98
   9   5  -5    3.17    1.47
   9   5  -5    2.89    0.81
  -9  -5   5    2.48    0.74
   9   6  -5    2.17    0.91
   9   6  -5    3.10    1.82
  -9  -6   5    2.70    0.84
   9   7  -5    2.72    1.04
  -9  -7   5    1.68    0.92
   9   8  -5    1.76    1.15
  -9  -8   5   -0.09    0.98
  -8   7   5    1.62    0.77
  -8   6   5    3.92    0.70
   8  -5  -5    2.16    0.75
   8  -4  -5    1.99    0.66
   8  -3  -5    3.10    0.60
  -8   3   5    4.26    0.56
   8  -2  -5    2.30    0.49
  -8   2   5    2.70    0.45
   8  -1  -5    4.90    0.53
  -8   1   5    4.71    0.52
  -8   1   5    4.31    0.56
   8   0  -5    7.37    0.67
   8   0  -5    7.53    0.73
   8   0  -5    8.04    0.91
   8   0  -5    6.42    0.67
  -8   0   5    8.51    0.78
  -8   0   5    6.94    0.66
  -8   0   5    8.27    0.92
   8   1  -5    3.81    0.58
   8   1  -5    4.80    0.60
   8   1  -5    4.45    0.58
   8   1  -5    4.68    0.92
  -8  -1   5    4.56    0.54
  -8  -1   5    3.84    0.82
  -8  -1   5    4.33    0.56
   8   2  -5    2.30    0.56
   8   2  -5    1.99    0.97
   8   2  -5    1.14    0.57
  -8  -2   5    3.30    0.54
  -8  -2   5    2.82    0.54
   8   3  -5    4.99    1.07
   8   3  -5    3.70    0.62
  -8  -3   5    3.61    0.59
   8   4  -5    1.36    0.65
   8   4  -5    1.06    1.22
  -8  -4   5    0.50    0.60
   8   5  -5    1.01    1.34
   8   5  -5    2.49    0.78
  -8  -5   5    3.18    0.72
   8   6  -5    6.85    1.73
   8   6  -5    3.93    0.97
  -8  -6   5    2.87    0.91
   8   7  -5    3.33    1.06
   8   8  -5    2.01    1.12
  -8  -8   5    2.23    1.07
  -7   6   5    1.41    0.68
   7  -5  -5   -0.24    0.72
   7  -4  -5    2.80    0.67
   7  -3  -5    5.21    0.64
  -7   3   5    6.27    0.63
   7  -2  -5    5.59    0.59
  -7   2   5    5.70    0.57
   7  -1  -5   10.54    0.78
  -7   1   5   10.84    0.89
  -7   1   5   10.69    0.79
   7   0  -5    0.38    0.54
   7   0  -5    0.04    0.38
   7   0  -5    0.70    0.34
   7   0  -5    0.43    0.35
  -7   0   5    0.42    0.33
  -7   0   5    1.20    0.55
  -7   0   5    0.78    0.40
   7   1  -5   10.01    0.97
   7   1  -5   11.12    0.87
   7   1  -5   11.60    1.20
   7   1  -5   11.82    0.91
  -7  -1   5   14.64    1.21
  -7  -1   5   12.86    0.90
  -7  -1   5   11.39    0.88
   7   2  -5    3.48    0.99
   7   2  -5    4.08    0.62
   7   2  -5    3.39    0.58
   7   2  -5    5.63    0.73
  -7  -2   5    4.63    0.57
   7   3  -5    5.60    0.67
   7   3  -5    4.65    1.08
   7   3  -5    6.27    0.80
  -7  -3   5    5.33    0.65
   7   4  -5    4.09    0.74
   7   4  -5    5.10    1.21
  -7  -4   5    5.24    0.73
  -7  -4   5    4.67    0.72
   7   5  -5    3.85    0.77
   7   5  -5    2.67    1.31
  -7  -5   5    1.18    0.71
   7   6  -5    3.16    1.61
   7   6  -5    3.48    0.90
  -7  -6   5    3.12    0.85
   7   7  -5    1.71    1.04
  -7  -7   5    1.68    0.95
   7   8  -5    3.09    1.12
  -7  -8   5    0.09    1.00
   6  -6  -5    1.66    0.83
  -6   6   5    2.25    0.78
   6  -5  -5    3.06    0.75
   6  -5  -5    2.88    0.80
  -6   5   5    3.28    0.69
   6  -4  -5    1.59    0.59
   6  -3  -5    7.00    0.69
  -6   3   5    6.19    0.64
   6  -2  -5    9.77    0.79
  -6   2   5   10.49    0.77
  -6   1   5    9.53    0.78
   6   0  -5    3.06    0.40
   6   0  -5    3.36    0.41
   6   0  -5    3.06    0.39
   6   0  -5    3.33    0.56
  -6   0   5    3.50    0.56
  -6   0   5    3.73    0.46
  -6   0   5    3.32    0.37
   6   1  -5    8.12    0.96
   6   1  -5    7.15    0.67
   6   1  -5    7.93    0.67
  -6  -1   5    7.66    0.65
  -6  -1   5    8.40    0.67
  -6  -1   5    8.84    0.95
   6   2  -5    9.20    1.16
   6   2  -5    7.71    0.82
   6   2  -5    9.39    0.97
   6   2  -5    9.62    0.80
  -6  -2   5    9.59    1.08
  -6  -2   5   10.03    0.78
   6   3  -5    5.10    1.12
   6   3  -5    5.63    0.82
   6   3  -5    6.04    0.71
   6   3  -5    5.82    0.71
  -6  -3   5    6.96    0.69
   6   4  -5    2.29    1.07
   6   4  -5    2.86    0.65
  -6  -4   5    2.10    0.60
  -6  -4   5    2.57    0.62
   6   5  -5    4.87    0.81
   6   5  -5    3.52    1.32
  -6  -5   5    4.88    0.76
   6   6  -5    4.68    1.59
  -6  -6   5    3.19    0.82
   6   7  -5    2.09    0.97
  -6  -7   5    2.43    0.90
   6   8  -5    3.12    1.13
  -6  -8   5    1.24    0.97
   5  -6  -5    4.51    0.94
  -5   6   5    4.49    0.94
   5  -5  -5    4.30    0.75
   5  -5  -5    2.69    0.83
  -5   5   5    3.25    0.78
   5  -4  -5    3.99    0.77
   5  -4  -5    5.86    0.69
  -5   4   5    5.91    0.72
   5  -3  -5    3.30    0.56
  -5   3   5    3.11    0.52
   5  -2  -5   14.24    1.02
  -5   2   5   15.24    1.00
   5   0  -5   18.07    1.39
   5   0  -5   20.35    1.43
  -5   0   5   20.82    1.44
  -5   0   5   19.19    1.40
   5   1  -5    6.53    0.58
   5   1  -5    7.42    0.57
   5   1  -5    5.22    0.82
  -5  -1   5    6.52    0.77
  -5  -1   5    7.32    0.57
   5   2  -5   12.27    1.00
   5   2  -5   10.97    1.36
   5   2  -5   14.14    0.98
   5   2  -5   14.32    1.18
  -5  -2   5   15.22    0.99
  -5  -2   5   12.83    1.30
   5   3  -5    3.51    0.63
   5   3  -5    3.59    1.03
   5   3  -5    2.72    0.63
  -5  -3   5    3.92    0.60
  -5  -3   5    2.56    0.58
   5   4  -5    5.36    1.16
  -5  -4   5    7.14    0.74
  -5  -4   5    5.84    0.79
   5   5  -5    3.94    1.30
  -5  -5   5    5.20    0.77
   5   6  -5    5.51    1.56
  -5  -6   5    5.57    0.85
  -5  -7   5    3.46    0.89
  -5  -8   5    1.99    0.98
  -4   7   5    3.76    1.18
   4  -6  -5    0.44    0.78
  -4   6   5    1.04    0.90
   4  -5  -5    4.02    0.69
   4  -5  -5    4.66    0.79
  -4   5   5    4.44    0.85
   4  -4  -5    0.65    0.65
   4  -4  -5    1.95    0.55
  -4   4   5    2.17    0.66
   4  -3  -5    2.40    0.52
  -4   3   5    2.66    0.48
  -4   3   5    3.49    0.62
   4  -2  -5    9.76    0.81
  -4   2   5   12.76    0.82
   4   0  -5   36.90    2.78
   4   0  -5   42.59    2.83
  -4   0   5   38.97    2.78
  -4   0   5   45.28    2.83
   4   1  -5   13.45    0.89
   4   1  -5   11.66    1.05
   4   1  -5   13.90    0.88
   4   1  -5   12.34    1.11
  -4  -1   5   15.19    0.88
  -4  -1   5   12.30    1.08
   4   2  -5    9.08    0.78
   4   2  -5    8.92    0.87
   4   2  -5    8.91    1.06
  -4  -2   5    8.04    0.97
  -4  -2   5   10.28    0.76
  -4  -2   5   10.19    0.86
   4   3  -5    2.78    0.61
   4   3  -5    2.15    0.94
   4   3  -5    1.72    0.57
  -4  -3   5    2.88    0.56
  -4  -3   5    2.83    0.55
   4   4  -5    1.82    0.99
  -4  -4   5    1.88    0.56
  -4  -4   5    0.84    0.57
   4   5  -5    7.65    1.32
   4   5  -5    5.17    0.91
  -4  -5   5    6.28    0.81
  -4  -5   5    6.07    0.86
   4   6  -5    3.75    1.38
  -4  -6   5    1.06    0.79
   4   7  -5    1.93    1.59
  -4  -7   5    2.96    0.94
  -4  -8   5    1.30    0.97
   3  -7  -5    1.07    0.91
   3  -6  -5    0.20    0.71
  -3   6   5    2.67    0.99
   3  -5  -5    0.64    0.64
  -3   5   5    1.78    0.86
   3  -4  -5    2.49    0.55
   3  -4  -5    3.59    0.78
   3  -4  -5    3.73    0.64
  -3   4   5    5.10    0.83
   3  -3  -5    3.44    0.54
   3  -3  -5    2.20    0.67
   3  -3  -5    3.34    0.56
  -3   3   5    3.93    0.74
  -3   3   5    3.20    0.53
  -3   3   5    3.27    0.70
   3   0  -5   17.95    1.25
  -3   0   5   17.75    1.22
  -3   0   5   16.43    1.21
  -3   0   5   17.98    1.24
   3   1  -5   16.78    1.28
   3   1  -5   16.26    1.26
   3   1  -5   15.92    1.21
   3   1  -5   16.87    1.08
  -3  -1   5   17.81    1.26
  -3  -1   5   15.78    1.26
  -3  -1   5   18.27    1.07
   3   2  -5    5.72    0.66
   3   2  -5    3.92    0.84
   3   2  -5    6.21    0.63
  -3  -2   5    5.03    0.78
  -3  -2   5    7.67    0.67
   3   3  -5    4.83    0.64
   3   3  -5    5.19    0.92
   3   3  -5    4.03    0.67
  -3  -3   5    5.24    0.59
  -3  -3   5    3.83    0.60
   3   4  -5    4.05    0.98
   3   4  -5    4.24    0.70
  -3  -4   5    3.57    0.59
  -3  -4   5    3.80    0.64
   3   5  -5    1.21    1.05
  -3  -5   5    0.46    0.59
  -3  -5   5    1.82    0.62
   3   6  -5    0.35    1.20
  -3  -6   5    0.98    0.72
   3   7  -5    1.56    1.47
  -3  -7   5    0.52    0.85
  -3  -8   5    2.53    1.03
   2  -6  -5    1.70    0.80
  -2   6   5    1.30    1.03
   2  -5  -5    6.23    0.88
   2  -5  -5    7.17    0.85
  -2   5   5    8.59    1.16
   2  -4  -5    7.50    0.78
   2  -4  -5    6.06    0.99
   2  -4  -5    7.89    0.83
  -2   4   5    6.89    1.06
  -2   4   5    9.08    1.05
   2  -3  -5    4.20    0.81
   2  -3  -5    6.23    0.63
   2  -3  -5    5.27    0.68
  -2   3   5    5.43    0.85
  -2   3   5    5.75    0.59
  -2   3   5    5.89    0.86
   2  -2  -5   40.19    2.91
   2  -2  -5   43.57    2.55
   2  -2  -5   42.85    2.99
  -2   2   5   37.39    2.92
  -2   2   5   42.14    2.54
  -2   2   5   40.10    2.89
   2  -1  -5    8.07    0.61
  -2   1   5    7.80    0.60
   2   0  -5  219.87   15.10
  -2   0   5  224.00   15.10
   2   1  -5    8.98    0.72
   2   1  -5    9.37    0.76
   2   1  -5    9.28    0.64
   2   1  -5    9.42    0.73
  -2  -1   5    8.00    0.70
  -2  -1   5    9.08    0.76
  -2  -1   5   10.97    0.63
   2   2  -5   46.22    3.04
   2   2  -5   42.17    2.76
   2   2  -5   41.84    3.22
   2   2  -5   41.70    3.15
  -2  -2   5   45.49    2.75
  -2  -2   5   48.95    3.23
  -2  -2   5   43.75    3.15
   2   3  -5    5.14    0.66
   2   3  -5    4.98    0.89
  -2  -3   5    5.44    0.68
  -2  -3   5    6.30    0.66
   2   4  -5    8.63    1.12
  -2  -4   5    8.50    0.82
  -2  -4   5    7.31    0.89
   2   5  -5    4.69    1.13
  -2  -5   5    6.00    0.86
  -2  -5   5    7.12    0.78
   2   6  -5    2.03    1.16
  -2  -6   5    1.94    0.68
   2   7  -5    0.89    1.34
  -2  -7   5    1.60    0.80
   1  -6  -5    2.45    0.87
  -1   6   5    2.24    1.18
   1  -5  -5    0.44    0.61
   1  -5  -5    0.19    0.68
  -1   5   5    2.61    1.01
   1  -4  -5    2.36    0.83
   1  -4  -5    3.63    0.65
   1  -4  -5    4.73    0.67
  -1   4   5    2.70    0.92
  -1   4   5    4.60    0.95
   1  -3  -5    3.99    0.84
   1  -3  -5    6.15    0.67
   1  -3  -5    4.97    0.68
  -1   3   5    7.91    0.96
  -1   3   5    6.22    0.62
  -1   3   5    6.21    0.89
   1  -2  -5    7.93    0.84
   1  -2  -5   11.06    0.82
   1  -2  -5    9.44    0.91
   1  -2  -5    9.77    0.73
   1  -1  -5   22.45    1.48
   1  -1  -5   19.57    1.30
   1  -1  -5   19.79    1.29
   1  -1  -5   19.81    1.52
  -1   1   5   22.34    1.47
  -1   1   5   20.57    1.30
  -1   1   5   19.86    1.29
  -1   1   5   22.93    1.51
   1   0  -5   96.29    6.43
  -1   0   5   92.00    6.42
   1   1  -5   22.53    1.60
   1   1  -5   25.44    1.66
   1   1  -5   22.67    1.45
  -1  -1   5   20.87    1.60
  -1  -1   5   24.75    1.65
  -1  -1   5   24.32    1.45
   1   2  -5   10.39    0.79
   1   2  -5    8.97    0.74
   1   2  -5    8.20    0.90
  -1  -2   5    8.66    0.87
  -1  -2   5    9.54    0.72
  -1  -2   5    8.64    0.79
   1   3  -5    5.14    0.68
   1   3  -5    5.27    0.87
  -1  -3   5    6.81    0.67
  -1  -3   5    6.29    0.70
   1   4  -5    3.27    0.87
  -1  -4   5    4.08    0.62
  -1  -4   5    4.05    0.65
   1   5  -5    0.09    0.86
  -1  -5   5    0.07    0.57
  -1  -5   5    0.42    0.63
   1   6  -5    1.69    1.09
  -1  -6   5    2.81    0.74
  -1  -7   5    1.03    0.75
  -1  -8   5    2.89    0.90
  -1  -9   5    1.90    1.02
   0   8   5    1.10    1.45
   0  -7  -5    1.54    0.92
   0  -6  -5    0.65    0.75
   0   6   5    1.53    1.24
   0  -5  -5    0.80    0.58
   0  -5  -5    0.85    0.64
   0   5   5    0.31    1.02
   0  -4  -5    1.73    0.56
   0  -4  -5    2.65    0.61
   0   4   5    2.58    0.94
   0  -3  -5    5.79    0.70
   0  -3  -5    6.37    0.79
   0  -3  -5    4.00    0.89
   0   3   5    8.92    0.78
   0   3   5    8.37    0.68
   0  -2  -5    3.16    0.41
   0  -2  -5    1.82    0.48
   0  -1  -5    1.58    0.24
   0  -1  -5    1.93    0.27
   0  -1  -5    1.65    0.30
   0   1   5    2.04    0.28
   0   1   5    3.08    0.27
   0   0  -5   -0.16    0.14
   0   0  -5    0.37    0.18
   0   0   5    0.11    0.15
   0   0   5   -0.16    0.11
   0   1  -5    4.26    0.35
   0   1  -5    3.58    0.40
   0   1  -5    3.39    0.34
   0  -1   5    3.36    0.33
   0  -1   5    3.63    0.38
   0  -1   5    3.28    0.32
   0   2  -5    2.81    0.44
   0   2  -5    3.17    0.55
   0  -2   5    2.44    0.49
   0   3  -5    5.45    0.90
   0   3  -5    7.13    0.72
   0  -3   5    7.78    0.75
   0   4  -5    2.40    0.81
   0  -4   5    2.81    0.61
   0  -4   5    2.23    0.54
   0   5  -5    1.14    0.86
   0  -5   5    1.29    0.54
   0  -5   5    1.23    0.60
   0   6  -5    0.62    1.01
   0  -6   5   -0.11    0.65
   0  -7   5    3.68    0.92
   0  -8   5    1.22    0.87
   1   7   5    1.78    0.96
  -1  -6  -5    1.94    0.80
   1   6   5    3.19    1.32
   1   6   5    3.00    0.80
  -1  -5  -5   -0.57    0.58
  -1  -5  -5    0.26    0.66
   1   5   5    1.63    1.09
   1   5   5    1.48    0.66
  -1  -4  -5    2.40    0.62
  -1  -4  -5    3.69    0.67
   1   4   5    3.78    1.04
   1   4   5    3.80    0.65
   1   4   5    3.84    0.69
  -1  -3  -5    4.79    0.70
  -1  -3  -5    4.09    0.91
  -1  -3  -5    6.32    0.69
   1   3   5    6.87    0.74
   1   3   5    5.06    0.93
   1   3   5    6.75    0.67
   1   3   5    7.55    0.98
   1   3   5    7.69    0.72
  -1  -2  -5    9.12    0.92
  -1  -2  -5    7.41    0.79
  -1  -2  -5    8.35    0.85
  -1  -2  -5    9.05    0.68
  -1  -2  -5    7.77    0.70
   1   2   5   10.75    0.83
  -1  -1  -5   23.61    1.47
  -1  -1  -5   24.06    1.48
  -1  -1  -5   23.29    1.67
   1   1   5   23.96    1.48
   1   1   5   22.11    1.66
   1   1   5   23.93    1.47
  -1   0  -5   91.09    5.40
  -1   0  -5   87.80    6.08
   1   0   5   87.08    5.40
   1   0   5   89.90    6.08
  -1   1  -5   24.40    1.60
  -1   1  -5   22.53    1.41
  -1   1  -5   20.83    1.54
   1  -1   5   21.35    1.41
   1  -1   5   22.42    1.54
   1  -1   5   24.10    1.60
  -1   2  -5   10.01    0.79
  -1   2  -5   10.83    0.78
  -1   2  -5    9.87    0.87
   1  -2   5    9.31    0.77
   1  -2   5    9.90    0.77
   1  -2   5    8.30    0.85
  -1   3  -5    8.20    0.67
  -1   3  -5    5.17    0.66
  -1   3  -5    5.25    0.81
   1  -3   5    5.17    0.82
   1  -3   5    5.91    0.67
  -1   4  -5    5.19    0.62
  -1   4  -5    4.20    0.84
   1  -4   5    4.29    0.66
  -1   5  -5   -0.40    0.85
   1  -5   5    0.31    0.60
   1  -5   5    0.07    0.53
  -1   6  -5    1.96    1.06
   1  -6   5    2.43    0.69
   1  -7   5    1.33    0.75
   1  -8   5    1.82    0.97
   2   8   5    4.05    1.19
  -2  -7  -5    1.21    0.98
  -2  -6  -5    1.98    0.82
   2   6   5    3.01    1.33
   2   6   5    1.68    0.83
  -2  -5  -5    7.91    0.92
  -2  -5  -5    5.58    0.86
   2   5   5    6.21    1.31
   2   5   5    8.37    0.91
  -2  -4  -5    8.82    0.88
  -2  -4  -5    7.97    0.91
   2   4   5    9.35    1.27
   2   4   5    7.28    0.83
   2   4   5    8.11    0.92
  -2  -3  -5    6.07    0.94
  -2  -3  -5    5.16    0.70
  -2  -3  -5    6.38    0.67
   2   3   5    4.61    0.91
   2   3   5    6.15    0.67
   2   3   5    5.36    0.71
   2   3   5    4.38    0.61
   2   3   5    7.68    1.02
  -2  -2  -5   42.53    2.70
  -2  -2  -5   43.54    3.09
  -2  -2  -5   46.40    3.08
  -2  -2  -5   43.80    2.70
   2   2   5   41.74    2.69
   2   2   5   42.77    3.10
   2   2   5   42.38    3.10
   2   2   5   44.99    2.71
   2   2   5   41.13    3.16
  -2  -1  -5    8.47    0.63
  -2  -1  -5    8.71    0.73
   2   1   5    9.22    0.64
   2   1   5    7.60    0.71
   2   1   5    9.04    0.63
  -2   0  -5  205.16   14.11
  -2   0  -5  211.68   12.53
   2   0   5  200.67   14.11
   2   0   5  210.95   12.53
  -2   1  -5    8.77    0.65
  -2   1  -5    9.41    0.71
  -2   1  -5    9.36    0.64
   2  -1   5    8.35    0.62
   2  -1   5    8.87    0.69
   2  -1   5    8.37    0.65
  -2   2  -5   40.95    2.94
  -2   2  -5   44.61    3.03
  -2   2  -5   41.20    2.69
   2  -2   5   43.49    3.03
   2  -2   5   44.30    2.94
   2  -2   5   44.67    2.69
  -2   3  -5    7.03    0.68
  -2   3  -5    6.00    0.78
  -2   3  -5    5.88    0.67
   2  -3   5    5.51    0.77
   2  -3   5    6.17    0.67
  -2   4  -5    8.09    0.79
  -2   4  -5    8.34    0.97
   2  -4   5    8.47    0.83
  -2   5  -5    5.96    0.97
   2  -5   5    5.80    0.76
  -2   6  -5    1.80    1.04
   2  -6   5    2.32    0.70
   2  -7   5    1.86    0.79
   2  -8   5    1.61    1.01
  -3  -7  -5    0.08    0.96
   3   7   5    0.29    0.96
  -3  -6  -5    2.62    0.82
   3   6   5    2.03    0.83
   3   6   5    0.30    1.38
  -3  -5  -5   -0.07    0.69
   3   5   5    1.48    0.69
   3   5   5    0.94    1.14
  -3  -4  -5    3.90    0.67
  -3  -4  -5    3.76    0.65
   3   4   5    3.90    1.13
   3   4   5    4.34    0.70
   3   4   5    3.66    0.73
  -3  -3  -5    3.75    0.57
  -3  -3  -5    3.96    0.59
   3   3   5    2.38    0.92
   3   3   5    3.21    0.65
   3   3   5    3.51    0.59
   3   3   5    3.96    0.62
  -3  -2  -5    7.92    0.71
  -3  -2  -5    8.66    0.70
  -3  -2  -5    5.38    0.80
  -3  -1  -5   15.63    1.03
  -3  -1  -5   14.15    1.17
   3   1   5   15.99    1.04
   3   1   5   16.04    1.03
   3   1   5   14.29    1.16
  -3   0  -5   16.27    1.06
  -3   0  -5   16.26    1.19
   3   0   5   16.52    1.06
   3   0   5   15.64    1.18
  -3   1  -5   14.28    0.98
  -3   1  -5   15.23    1.09
  -3   1  -5   14.03    1.03
   3  -1   5   14.49    1.03
   3  -1   5   13.80    0.97
   3  -1   5   15.34    1.08
  -3   2  -5    8.87    0.73
  -3   2  -5    9.20    0.82
   3  -2   5    8.44    0.70
   3  -2   5    7.39    0.80
  -3   3  -5    4.68    0.59
  -3   3  -5    2.82    0.63
  -3   3  -5    5.12    0.54
   3  -3   5    2.73    0.63
   3  -3   5    4.02    0.60
  -3   4  -5    3.23    0.73
  -3   4  -5    4.34    0.56
   3  -4   5    3.87    0.61
  -3   5  -5    2.25    0.58
  -3   5  -5    0.45    0.76
   3  -5   5    2.05    0.67
  -3   6  -5    2.58    0.93
   3  -6   5    1.92    0.72
   3  -7   5    0.63    0.84
   3  -8   5    0.40    0.87
  -4  -7  -5    3.11    0.94
   4   7   5    2.92    1.02
  -4  -6  -5    1.88    0.77
   4   6   5    2.28    1.37
   4   6   5    2.35    0.83
  -4  -5  -5    5.10    0.79
   4   5   5    5.77    1.31
   4   5   5    3.72    0.81
  -4  -4  -5    3.25    0.63
  -4  -4  -5    2.01    0.59
   4   4   5    2.57    1.07
   4   4   5    1.99    0.63
   4   4   5    1.54    0.70
  -4  -3  -5    2.54    0.59
  -4  -3  -5    2.68    0.86
  -4  -3  -5    3.25    0.57
   4   3   5    3.04    0.92
   4   3   5    3.15    0.67
   4   3   5    3.08    0.60
   4   3   5    3.18    0.62
  -4  -2  -5    9.11    0.84
  -4  -2  -5    8.97    0.83
  -4  -2  -5   10.65    1.08
  -4  -2  -5    9.44    1.02
   4   2   5    8.57    1.05
   4   2   5   11.15    1.12
   4   2   5   11.21    0.87
   4   2   5   10.61    0.83
  -4  -1  -5   10.88    0.98
  -4  -1  -5   11.17    0.86
   4   1   5    9.78    0.96
   4   1   5   12.62    0.86
   4   1   5   12.35    0.87
  -4   0  -5   33.73    2.40
  -4   0  -5   34.72    2.14
   4   0   5   33.43    2.39
   4   0   5   34.49    2.14
  -4   1  -5   11.84    0.91
  -4   1  -5   11.62    0.87
  -4   1  -5   12.08    0.84
   4  -1   5   11.23    0.84
   4  -1   5   11.38    0.91
   4  -1   5   11.17    0.86
  -4   2  -5    9.26    0.77
  -4   2  -5    9.61    0.83
  -4   2  -5    8.60    0.78
   4  -2   5    8.45    0.82
   4  -2   5    9.87    0.76
   4  -2   5    8.93    0.75
  -4   3  -5    1.87    0.56
  -4   3  -5    2.98    0.47
   4  -3   5    1.98    0.56
   4  -3   5    2.44    0.55
  -4   4  -5    2.42    0.65
  -4   4  -5    1.84    0.46
   4  -4   5    2.02    0.54
  -4   5  -5    6.59    0.75
  -4   5  -5    7.01    0.93
   4  -5   5    4.87    0.77
  -4   6  -5    3.47    0.70
  -4   6  -5    2.93    0.90
   4  -6   5    2.03    0.75
   4  -8   5   -1.33    0.87
  -5  -7  -5    3.66    0.96
   5   7   5    3.02    1.03
  -5  -6  -5    5.24    0.92
   5   6   5    5.82    0.95
  -5  -5  -5    3.71    0.78
   5   5   5    6.97    0.86
   5   5   5    3.68    1.34
  -5  -4  -5    5.77    0.80
   5   4   5    6.41    0.91
   5   4   5    7.39    0.82
   5   4   5    7.07    1.24
  -5  -3  -5    2.93    0.60
  -5  -3  -5    2.05    0.87
   5   3   5    3.61    0.71
   5   3   5    4.15    0.67
   5   3   5    3.04    0.96
  -5  -2  -5   13.06    1.06
  -5  -2  -5   12.82    1.30
  -5  -2  -5   12.79    1.06
   5   2   5   13.64    1.36
   5   2   5   15.43    1.07
   5   2   5   15.37    1.10
  -5  -1  -5    6.53    0.64
  -5  -1  -5    5.87    0.67
   5   1   5    4.73    0.66
   5   1   5    5.97    0.61
   5   1   5    5.10    0.66
  -5   0  -5   14.65    1.10
  -5   0  -5   15.72    1.21
   5   0   5   16.89    1.14
   5   0   5   15.97    1.21
   5   0   5   15.05    1.10
  -5   1  -5    6.43    0.61
  -5   1  -5    7.07    0.63
  -5   1  -5    5.05    0.64
   5  -1   5    6.28    0.62
   5  -1   5    6.70    0.60
   5  -1   5    6.21    0.64
  -5   2  -5   13.35    1.00
  -5   2  -5   12.84    0.97
  -5   2  -5   13.10    1.05
   5  -2   5   11.38    1.04
   5  -2   5   13.48    1.00
   5  -2   5   13.15    0.97
  -5   3  -5    3.03    0.60
  -5   3  -5    3.14    0.49
   5  -3   5    2.71    0.58
   5  -3   5    3.33    0.45
   5  -3   5    3.04    0.61
  -5   4  -5    6.45    0.80
  -5   4  -5    6.37    0.71
   5  -4   5    7.04    0.75
  -5   5  -5    3.95    0.64
  -5   5  -5    5.93    0.88
   5  -5   5    4.70    0.76
   5  -6   5    4.28    0.84
   5  -7   5    3.07    0.90
   5  -8   5    0.09    0.93
  -6  -7  -5    1.30    0.96
   6   7   5    1.26    1.00
  -6  -6  -5    2.44    0.84
   6   6   5    2.18    0.87
  -6  -5  -5    3.10    0.80
   6   5   5    5.90    0.87
   6   5   5    2.57    1.36
  -6  -4  -5    1.55    0.61
   6   4   5    2.16    0.66
  -6  -3  -5    5.17    0.71
  -6  -3  -5    4.84    0.97
   6   3   5    5.76    1.06
   6   3   5    6.94    0.84
   6   3   5    5.71    0.76
  -6  -2  -5    8.35    0.84
  -6  -2  -5    8.97    0.85
  -6  -2  -5    8.59    1.03
   6   2   5    9.94    0.89
   6   2   5    9.71    0.86
   6   2   5    7.89    1.07
  -6  -1  -5    7.00    0.70
  -6  -1  -5    7.45    0.82
   6   1   5    6.63    0.79
   6   1   5    7.52    0.75
  -6   0  -5    3.04    0.49
  -6   0  -5    3.28    0.54
   6   0   5    3.14    0.42
   6   0   5    3.64    0.50
   6   0   5    3.07    0.50
  -6   1  -5    6.99    0.67
  -6   1  -5    6.94    0.72
  -6   1  -5    7.50    0.69
   6  -1   5    7.14    0.69
   6  -1   5    6.37    0.69
   6  -1   5    6.54    0.65
  -6   2  -5    7.80    0.77
  -6   2  -5    8.32    0.74
  -6   2  -5    8.77    0.75
   6  -2   5    8.57    0.76
   6  -2   5    7.20    0.71
   6  -2   5    7.16    0.75
  -6   3  -5    5.56    0.64
  -6   3  -5    4.74    0.66
   6  -3   5    5.40    0.69
   6  -3   5    5.66    0.61
   6  -3   5    5.86    0.71
  -6   4  -5    2.97    0.54
  -6   4  -5    2.51    0.66
   6  -4   5    2.16    0.62
  -6   5  -5    4.41    0.83
  -6   5  -5    4.53    0.66
   6  -5   5    3.37    0.72
  -6   6  -5    2.96    0.89
  -6   6  -5    3.55    0.68
   6  -6   5    2.30    0.77
   6  -7   5    0.86    0.87
   6  -8   5    0.53    0.96
  -7  -7  -5    1.10    0.90
   7   7   5    3.33    1.04
  -7  -6  -5    2.68    0.87
   7   6   5    2.74    1.55
   7   6   5    2.83    0.96
  -7  -5  -5    0.26    0.67
   7   5   5    0.58    1.29
   7   5   5    1.21    0.79
  -7  -4  -5    2.85    0.67
   7   4   5    3.47    0.76
  -7  -3  -5    4.70    0.69
  -7  -3  -5    2.21    0.91
   7   3   5    4.16    1.00
   7   3   5    6.10    0.75
  -7  -2  -5    3.59    0.83
  -7  -2  -5    3.48    0.63
   7   2   5    2.45    0.87
   7   2   5    4.92    0.67
  -7  -1  -5    8.93    0.86
  -7  -1  -5   10.31    0.99
   7   1   5   10.67    1.04
   7   1   5    8.48    0.89
  -7   0  -5    0.10    0.44
  -7   0  -5    0.30    0.49
   7   0   5    0.41    0.46
   7   0   5    0.38    0.37
   7   0   5    0.42    0.43
  -7   1  -5    9.80    0.84
  -7   1  -5    9.21    0.87
  -7   1  -5    9.21    0.83
   7  -1   5    8.28    0.82
   7  -1   5    9.44    0.80
   7  -1   5    8.82    0.82
  -7   2  -5    4.82    0.53
  -7   2  -5    3.50    0.57
   7  -2   5    3.81    0.48
   7  -2   5    3.10    0.54
   7  -2   5    3.84    0.60
  -7   3  -5    6.06    0.66
  -7   3  -5    6.11    0.71
   7  -3   5    5.30    0.70
   7  -3   5    5.54    0.62
  -7   4  -5    3.34    0.68
  -7   4  -5    4.29    0.58
   7  -4   5    3.94    0.69
  -7   5  -5    2.79    0.60
  -7   5  -5    0.69    0.73
   7  -5   5    1.56    0.67
  -7   6  -5    2.51    0.70
   7  -6   5    2.15    0.79
   7  -7   5    1.11    0.94
   7  -8   5   -0.33    0.95
  -8  -7  -5    2.90    1.01
   8   7   5    1.37    1.05
  -8  -6  -5    4.17    0.90
   8   6   5    5.65    1.02
   8   6   5    5.17    1.70
  -8  -5  -5    1.96    0.73
   8   5   5    1.69    1.36
   8   5   5    2.21    0.83
  -8  -4  -5    0.78    0.67
   8   4   5    1.91    0.73
   8   4   5    0.82    1.13
  -8  -3  -5    2.55    0.90
  -8  -3  -5    2.69    0.59
   8   3   5    2.85    0.66
   8   3   5    3.35    0.97
  -8  -2  -5    0.84    0.79
   8   2   5    1.94    0.84
   8   2   5    2.96    0.62
  -8  -1  -5    4.21    0.70
   8   1   5    2.94    0.60
   8   1   5    2.92    0.76
  -8   0  -5    8.25    0.85
  -8   0  -5    7.27    0.74
   8   0   5    7.39    0.80
   8   0   5    8.39    0.78
   8   0   5    7.17    0.77
  -8   1  -5    4.17    0.54
  -8   1  -5    3.97    0.63
   8  -1   5    3.09    0.56
   8  -1   5    4.31    0.52
   8  -1   5    3.77    0.59
  -8   2  -5    1.82    0.47
  -8   2  -5    2.07    0.51
   8  -2   5    2.26    0.55
   8  -2   5    2.26    0.50
   8  -2   5    1.65    0.44
  -8   3  -5    3.10    0.58
  -8   3  -5    3.47    0.51
   8  -3   5    3.58    0.62
   8  -3   5    2.59    0.46
  -8   4  -5    1.82    0.55
  -8   4  -5    2.31    0.64
   8  -4   5    2.12    0.66
  -8   5  -5    2.38    0.61
  -8   5  -5    1.85    0.71
   8  -5   5    2.76    0.75
  -8   6  -5    5.63    0.83
   8  -6   5    4.72    0.92
   8  -7   5    1.81    0.92
  -9  -7  -5    2.68    0.98
  -9  -6  -5    1.65    0.86
   9   6   5    2.73    0.99
  -9  -5  -5    2.14    0.76
   9   5   5    1.95    0.86
   9   5   5    1.55    1.44
  -9  -4  -5   10.07    1.02
   9   4   5    9.41    1.50
   9   4   5   10.49    1.07
  -9  -3  -5    3.88    1.02
  -9  -3  -5    5.30    0.72
   9   3   5    5.55    0.78
   9   3   5    5.83    1.09
  -9  -2  -5   21.08    1.82
   9   2   5   21.19    1.88
   9   2   5   20.86    1.54
  -9  -1  -5    2.61    0.68
   9   1   5    1.44    0.71
   9   1   5    1.91    0.55
  -9   0  -5   46.05    3.25
   9   0   5   43.26    2.90
   9   0   5   46.98    3.15
  -9   1  -5    3.52    0.59
  -9   1  -5    2.41    0.51
   9  -1   5    2.85    0.57
   9  -1   5    2.21    0.51
   9  -1   5    1.87    0.47
  -9   2  -5   20.03    1.50
  -9   2  -5   20.10    1.54
   9  -2   5   19.47    1.48
   9  -2   5   21.02    1.44
   9  -2   5   20.56    1.56
  -9   3  -5    6.32    0.70
  -9   3  -5    5.46    0.70
   9  -3   5    4.58    0.59
   9  -3   5    5.57    0.74
  -9   4  -5    8.80    0.96
  -9   4  -5    9.14    0.91
   9  -4   5   10.49    1.02
  -9   5  -5    2.22    0.62
  -9   5  -5    1.53    0.74
   9  -5   5    1.71    0.76
  -9   6  -5    2.90    0.76
   9  -6   5    3.37    0.89
   9  -7   5    3.13    1.01
 -10  -7  -5    0.46    0.95
  10   7   5    1.17    1.07
 -10  -6  -5    0.81    0.81
  10   6   5    2.12    1.03
 -10  -5  -5    2.21    0.76
  10   5   5    1.13    1.49
  10   5   5    2.74    0.85
 -10  -4  -5    1.74    0.69
  10   4   5    2.78    1.26
  10   4   5    2.09    0.79
 -10  -3  -5    3.05    1.02
 -10  -3  -5    4.59    0.73
  10   3   5    3.37    1.09
  10   3   5    4.54    0.78
 -10  -2  -5   10.64    1.22
  10   2   5    9.31    1.22
  10   2   5    9.50    0.97
 -10  -1  -5    6.51    0.90
  10   1   5    6.53    0.75
  10   1   5    7.38    0.79
  10   1   5    6.08    0.93
 -10   0  -5    4.86    0.74
  10   0   5    4.11    0.66
  10   0   5    4.18    0.57
 -10   1  -5    5.37    0.78
 -10   1  -5    6.26    0.68
  10  -1   5    5.97    0.74
  10  -1   5    6.09    0.66
 -10   2  -5   10.57    0.93
 -10   2  -5   10.18    1.00
  10  -2   5   10.37    0.90
  10  -2   5   10.03    0.94
 -10   3  -5    5.43    0.65
 -10   3  -5    4.08    0.72
  10  -3   5    4.23    0.75
 -10   4  -5    2.29    0.68
 -10   4  -5    2.62    0.59
  10  -4   5    1.80    0.76
 -10   5  -5    2.20    0.80
 -10   5  -5    2.74    0.68
  10  -5   5    3.30    0.81
 -10   6  -5    1.33    0.75
  10  -6   5    1.23    0.84
 -11  -7  -5    0.74    0.93
  11   7   5    1.83    1.14
 -11  -6  -5    1.42    0.88
  11   6   5    2.02    1.01
 -11  -5  -5    5.72    0.94
  11   5   5    3.66    0.98
 -11  -4  -5    2.14    0.70
  11   4   5    1.39    0.79
  11   4   5    2.51    1.31
 -11  -3  -5    7.95    1.23
  11   3   5    8.12    0.98
  11   3   5    6.17    1.28
 -11  -2  -5   10.55    1.23
  11   2   5    8.31    0.92
  11   2   5    8.69    1.26
 -11  -1  -5    9.54    1.17
  11   1   5   11.58    1.02
  11   1   5   11.18    1.22
  11   1   5   11.76    1.07
 -11   0  -5    0.11    0.61
 -11   0  -5    0.80    0.42
  11   0   5    1.01    0.45
  11   0   5    0.98    0.57
 -11   1  -5   11.59    0.97
 -11   1  -5    9.56    1.03
  11  -1   5   10.40    0.95
  11  -1   5    9.84    0.98
 -11   2  -5    8.01    0.91
 -11   2  -5    8.74    0.86
  11  -2   5    9.34    0.93
  11  -2   5    8.15    0.82
 -11   3  -5    8.20    0.90
 -11   3  -5    8.24    0.93
  11  -3   5    9.01    0.96
 -11   4  -5    2.64    0.73
 -11   4  -5    3.51    0.66
  11  -4   5    3.24    0.81
 -11   5  -5    4.53    0.76
 -11   5  -5    4.43    0.88
  11  -5   5    4.96    0.95
 -11   6  -5    2.36    0.78
  11  -6   5    0.98    0.94
  11  -7   5    0.35    1.01
 -12  -7  -5    1.45    0.95
  12   7   5    2.36    1.14
 -12  -6  -5    1.24    0.93
  12   6   5    3.74    1.09
 -12  -5  -5    1.79    0.81
  12   5   5    1.77    0.95
 -12  -4  -5    1.66    0.71
  12   4   5    3.60    0.87
  12   4   5    2.17    1.36
 -12  -3  -5    2.72    1.13
  12   3   5    2.93    1.16
  12   3   5    2.63    0.77
 -12  -2  -5    2.46    0.98
  12   2   5    3.42    1.08
  12   2   5    2.51    0.51
  12   2   5    3.04    0.70
 -12  -1  -5    0.53    0.79
  12   1   5    1.39    0.62
  12   1   5    0.91    0.78
  12   1   5    2.02    0.62
 -12   0  -5    0.62    0.71
  12   0   5    0.56    0.47
  12   0   5    1.75    0.63
 -12   1  -5    2.36    0.70
 -12   1  -5    2.35    0.55
  12  -1   5    1.46    0.63
  12  -1   5    1.14    0.51
 -12   2  -5    2.57    0.70
 -12   2  -5    2.97    0.60
  12  -2   5    1.70    0.73
 -12   3  -5    3.36    0.75
 -12   3  -5    3.34    0.66
  12  -3   5    3.45    0.79
 -12   4  -5    3.43    0.70
 -12   4  -5    4.27    0.80
  12  -4   5    4.12    0.91
 -12   5  -5    1.58    0.72
 -12   5  -5    4.00    0.86
  12  -5   5    2.77    0.92
 -12   6  -5    4.14    0.86
  12  -6   5    1.22    1.02
  12  -7   5    1.56    1.03
 -13  -6  -5    0.61    0.94
  13   6   5    4.12    1.15
 -13  -5  -5    1.79    0.81
  13   5   5    0.33    0.91
 -13  -4  -5    5.27    0.90
  13   4   5    2.99    1.50
  13   4   5    6.64    0.99
 -13  -3  -5    3.63    1.20
  13   3   5    2.83    1.21
  13   3   5    3.45    0.82
 -13  -2  -5   21.66    1.92
  13   2   5   18.68    1.99
  13   2   5   19.71    1.58
  13   2   5   19.19    1.56
 -13  -1  -5    8.66    1.18
  13   1   5    7.70    0.98
  13   1   5    9.44    1.04
  13   1   5    9.83    1.21
 -13   0  -5   16.77    1.57
 -13   0  -5   18.46    1.37
  13   0   5   16.32    1.40
  13   0   5   17.91    1.59
  13   0   5   17.11    1.38
 -13   1  -5    8.12    0.93
 -13   1  -5    8.16    1.00
  13  -1   5    7.68    0.91
  13  -1   5    7.12    0.79
 -13   2  -5   18.98    1.58
 -13   2  -5   18.88    1.51
  13  -2   5   17.93    1.45
 -13   3  -5    5.26    0.90
 -13   3  -5    5.42    0.74
  13  -3   5    4.21    0.88
 -13   4  -5    6.60    0.96
 -13   4  -5    7.07    0.86
  13  -4   5    5.56    1.01
 -13   5  -5    2.28    0.78
 -13   5  -5    2.95    0.90
  13  -5   5    2.45    0.95
 -13   6  -5    2.57    0.84
  13  -6   5    2.04    1.04
 -13   7  -5    0.07    0.87
 -14  -6  -5    1.76    0.95
  14   6   5    3.03    1.12
 -14  -5  -5    2.74    0.89
  14   4   5    2.03    0.95
 -14  -3  -5    4.43    1.31
  14   3   5    4.61    1.32
  14   3   5    3.69    0.89
 -14  -2  -5    3.48    1.17
  14   2   5    2.86    0.80
  14   2   5    3.91    1.20
  14   2   5    3.86    0.72
 -14  -1  -5    8.16    1.17
  14   1   5    7.58    1.19
  14   1   5    6.69    0.96
  14   1   5    8.23    0.94
 -14   0  -5    0.67    0.84
  14   0   5    1.30    0.73
  14   0   5    1.54    0.54
  14   0   5    0.34    0.80
 -14   1  -5    7.47    0.87
 -14   1  -5    7.64    1.03
  14  -1   5    8.48    0.98
 -14   2  -5    3.49    0.68
 -14   2  -5    2.16    0.82
  14  -2   5    3.11    0.83
 -14   3  -5    5.35    0.80
 -14   3  -5    5.66    0.97
  14  -3   5    5.29    0.97
 -14   4  -5    2.03    0.91
 -14   4  -5    3.48    0.77
  14  -4   5    3.22    0.98
 -14   5  -5    2.14    0.82
  14  -5   5    3.60    1.09
 -14   6  -5    3.47    0.91
 -15  -5  -5    4.41    0.97
  15   5   5    5.50    1.14
  15   4   5    3.56    1.61
  15   4   5    5.07    1.05
  15   3   5   -0.46    0.83
  15   3   5   -0.28    1.29
 -15  -2  -5    5.25    1.20
  15   2   5    2.68    0.87
  15   2   5    2.69    1.29
  15   2   5    2.86    0.72
 -15  -1  -5    6.90    1.19
  15   1   5    5.17    1.20
  15   1   5    5.48    0.92
  15   1   5    5.71    0.88
 -15   0  -5    2.73    0.98
 -15   0  -5    2.18    0.55
  15   0   5    2.59    0.80
  15   0   5    1.82    0.94
 -15   1  -5    4.26    0.97
 -15   1  -5    5.46    0.78
  15  -1   5    5.18    0.90
 -15   2  -5    2.19    0.71
 -15   2  -5    3.17    0.87
  15  -2   5    3.79    0.90
 -15   3  -5    1.23    0.71
 -15   3  -5   -0.15    0.85
  15  -3   5    0.51    0.91
 -15   4  -5    6.13    0.94
 -15   4  -5    7.13    1.10
  15  -4   5    7.12    1.18
 -15   5  -5    2.94    0.86
 -15   6  -5    1.95    0.89
  15  -6   5    1.37    1.12
  16   5   5    0.65    1.10
  16   4   5    3.37    1.08
  16   3   5    6.42    1.11
  16   3   5    5.96    0.80
 -16  -2  -5    0.89    1.30
  16   2   5    2.05    0.93
  16   2   5    2.98    1.39
  16   2   5    1.40    0.78
 -16  -1  -5   18.77    1.88
  16   1   5   15.89    1.86
  16   1   5   16.38    1.56
  16   1   5   19.05    1.59
 -16   0  -5    1.34    1.03
  16   0   5    1.27    0.85
  16   0   5   -0.56    0.95
 -16   1  -5   18.19    1.57
 -16   1  -5   17.90    1.76
  16  -1   5   19.51    1.56
 -16   2  -5    2.35    0.97
 -16   2  -5    2.75    0.76
  16  -2   5    2.17    0.95
 -16   3  -5    5.60    1.07
 -16   3  -5    4.26    0.89
  16  -3   5    5.54    1.10
 -16   4  -5    3.26    0.84
  16  -4   5    3.85    1.15
 -16   5  -5    4.13    0.95
 -16   6  -5    1.18    0.91
  17   5   5    0.49    1.10
  17   4   5    4.83    1.15
  17   3   5    1.99    1.05
 -17  -2  -5    3.30    1.44
  17   2   5    2.55    0.88
  17   2   5    3.61    1.06
 -17  -1  -5    3.74    1.32
  17   1   5    3.50    1.35
  17   1   5    3.67    1.02
 -17   0  -5    4.93    1.32
  17   0   5    7.81    1.15
  17   0   5    7.40    1.32
 -17   1  -5    5.83    1.18
 -17   1  -5    4.04    0.79
  17  -1   5    5.41    1.09
  17  -1   5    3.85    1.01
 -17   2  -5    2.44    1.03
 -17   2  -5    3.92    0.82
  17  -2   5    4.20    1.04
 -17   3  -5    1.40    0.81
  17  -3   5    1.04    1.06
 -17   4  -5    3.48    0.88
  17  -4   5    4.18    1.21
 -17   5  -5    1.66    0.89
 -17   6  -5    0.95    0.94
  18   4   5    2.18    1.17
  18   3   5    0.04    1.11
  18   3   5    2.23    1.62
 -18  -2  -5    2.33    1.47
  18   2   5    3.08    1.12
  18   1   5    2.81    1.04
 -18   0  -5    3.76    1.26
  18   0   5    5.01    1.10
  18   0   5    4.11    1.27
 -18   1  -5    2.01    0.71
 -18   1  -5    0.97    1.12
  18  -1   5    1.58    0.99
  18  -1   5    0.85    1.08
 -18   2  -5    3.19    0.87
  18  -2   5    4.25    1.09
 -18   3  -5    0.39    0.81
  18  -3   5    1.27    1.13
 -18   4  -5    2.12    0.90
  18  -4   5    1.78    1.18
 -18   5  -5    0.12    0.92
  19   4   5    3.03    1.23
  19   3   5    0.21    1.14
  19   2   5    7.84    1.31
 -19  -1  -5    3.64    1.47
  19   1   5    3.56    1.14
  19   0   5    4.29    1.20
 -19   1  -5    2.00    0.77
  19  -1   5    2.03    1.08
 -19   2  -5    4.78    0.97
  19  -2   5    7.59    1.26
 -19   3  -5    0.34    0.85
  19  -3   5    0.81    1.14
 -19   4  -5    1.59    0.96
  19  -4   5    3.58    1.26
  20   4   5    3.34    1.32
  20   3   5    6.99    1.38
  20   2   5    5.20    1.26
  20   1   5   11.64    1.52
  20   0   5    5.18    1.25
  20  -1   5   14.32    1.57
 -20   2  -5    3.06    0.95
  20  -2   5    5.93    1.25
 -20   3  -5    3.75    0.98
  20  -3   5    5.12    1.32
 -20   4  -5    0.50    0.94
  20  -4   5    2.74    1.28
  21   3   5   -0.12    1.24
  21   2   5    2.44    1.21
  21   1   5    0.54    1.17
  21   0   5    7.22    1.37
  21  -1   5    1.61    1.19
  21  -2   5    3.76    1.22
 -21   3  -5   -0.60    0.91
  21  -3   5    1.04    1.25
  22   1   5    1.31    1.19
  22   0   5   -0.02    1.19
  22  -1   5    3.72    1.29
  22  -2   5    0.98    1.19
 -22   1   6    0.39    0.92
  22   0  -6    5.71    1.14
  22   1  -6    0.76    1.06
 -21   3   6   -0.21    0.94
 -21   2   6    0.56    0.94
  21  -1  -6    3.54    1.04
 -21   1   6    3.56    0.96
  21   0  -6    3.90    1.07
  21   1  -6    5.58    1.13
  21   2  -6    0.78    1.06
  21   3  -6    1.95    1.22
 -20   3   6    1.25    0.93
 -20   2   6    5.04    1.05
  20  -1  -6    7.32    1.12
 -20   1   6    6.05    1.05
  20   0  -6    5.32    1.08
  20   1  -6    6.06    1.12
  20   2  -6    4.35    1.16
  20   3  -6    1.53    1.15
  20   4  -6    2.19    1.16
 -19   4   6    3.56    1.00
 -19   3   6    0.90    0.86
 -19   2   6    2.51    0.94
  19  -1  -6    2.21    0.91
 -19   1   6    1.73    0.84
  19   0  -6    4.66    0.98
  19   1  -6    2.92    0.96
  19   2  -6    1.25    1.06
  19   3  -6    1.47    1.09
 -18   4   6    2.31    0.89
 -18   3   6    1.26    0.83
 -18   2   6    1.12    0.86
  18  -1  -6    0.95    0.85
 -18   1   6    0.87    0.80
  18   0  -6   13.15    1.30
  18   1  -6    1.72    0.88
  18   2  -6    1.99    1.01
  18   3  -6    1.17    1.02
  18   4  -6    2.58    1.14
 -17   5   6    2.91    0.90
 -17   4   6    4.88    0.93
 -17   3   6    3.58    0.86
  17  -2  -6    4.26    0.95
 -17   2   6    4.84    0.90
  17  -1  -6   18.19    1.47
 -17   1   6   17.96    1.61
  17   0  -6    2.62    0.83
 -17   0   6    1.95    0.75
  17   1  -6   20.53    1.63
  17   2  -6    5.64    1.05
  17   3  -6    4.67    1.08
  17   4  -6    2.17    1.05
 -17  -4   6    3.36    0.96
  17   5  -6    2.68    1.10
 -16   5   6    2.71    0.88
 -16   4   6    4.64    0.89
 -16   3   6    6.53    0.93
  16  -2  -6    7.86    1.00
 -16   2   6    6.13    0.93
  16  -1  -6    8.79    1.02
 -16   1   6   10.42    1.18
  16   0  -6    1.79    0.78
 -16   0   6    2.61    0.72
  16   1  -6    7.06    0.97
  16   1  -6    6.11    1.42
  16   2  -6    5.88    1.02
  16   3  -6    6.98    1.11
  16   4  -6    4.41    1.08
 -16  -4   6    4.72    1.01
  16   5  -6    2.27    1.07
 -16  -5   6    0.56    0.98
 -15   6   6    2.28    0.86
 -15   5   6    1.65    0.81
 -15   4   6    5.91    0.88
  15  -3  -6    1.78    0.82
 -15   3   6    0.64    0.69
  15  -2  -6    2.29    0.75
 -15   2   6    1.42    0.68
  15  -1  -6    2.23    0.71
 -15   1   6    3.73    0.74
  15   0  -6   -0.23    0.97
  15   0  -6    2.93    0.72
 -15   0   6    0.97    0.65
  15   1  -6    2.83    1.16
  15   1  -6    2.34    0.77
  15   2  -6    0.64    1.34
  15   2  -6    0.92    0.78
  15   3  -6    3.31    0.92
  15   3  -6    2.79    1.61
 -15  -3   6    2.08    0.81
  15   4  -6    6.31    1.06
  15   4  -6    7.62    1.83
 -15  -4   6    4.85    0.95
  15   5  -6    1.74    1.00
 -15  -5   6    1.27    0.97
  15   6  -6    1.82    1.13
 -15  -6   6    1.33    1.01
 -14   6   6    2.10    0.79
 -14   5   6    2.48    0.76
 -14   4   6    5.78    0.86
 -14   3   6    4.17    0.73
  14  -2  -6    4.07    0.75
 -14   2   6    3.33    0.70
  14  -1  -6    5.71    0.75
 -14   1   6    4.95    0.78
  14   0  -6    9.09    1.19
  14   0  -6    9.07    0.93
 -14   0   6    8.94    1.04
 -14   0   6   10.11    1.11
  14   1  -6    4.71    0.78
  14   1  -6    3.18    1.12
  14   2  -6    4.84    0.84
  14   2  -6    4.83    1.34
  14   3  -6    4.48    0.89
  14   3  -6    2.95    1.52
 -14  -3   6    4.69    0.83
  14   4  -6    4.78    1.00
  14   4  -6    5.95    1.70
 -14  -4   6    6.45    0.99
  14   5  -6    3.95    1.04
 -14  -5   6    2.24    0.93
 -14  -6   6    1.20    1.02
 -13   4   6    9.19    0.99
  13  -3  -6    9.35    0.97
 -13   3   6    8.47    0.94
  13  -2  -6   12.93    1.07
 -13   2   6   12.02    1.16
  13  -1  -6   15.23    1.18
 -13   1   6   15.67    1.19
 -13   1   6   14.87    1.32
  13   0  -6    3.51    0.94
  13   0  -6    4.11    0.68
  13   0  -6    4.96    0.70
  13   0  -6    2.94    0.73
 -13   0   6    3.30    0.85
 -13   0   6    4.19    0.61
 -13   0   6    5.74    0.71
  13   1  -6   19.49    1.40
  13   1  -6   15.99    1.74
  13   2  -6   11.10    1.03
  13   2  -6    7.14    1.45
  13   3  -6    9.69    0.97
  13   3  -6    8.30    1.64
 -13  -3   6    9.03    0.97
  13   4  -6    7.40    1.00
 -13  -4   6    6.58    0.99
  13   5  -6    4.68    1.03
 -13  -5   6    4.26    0.94
  13   6  -6    0.64    1.02
 -13  -6   6    1.67    0.93
  13   7  -6    0.60    1.07
 -13  -7   6    0.94    1.07
  12  -3  -6   10.61    0.99
 -12   3   6    9.94    0.97
  12  -2  -6   11.87    0.99
 -12   2   6   11.48    0.96
 -12   2   6   10.62    1.04
  12  -1  -6    8.99    0.85
  12  -1  -6    8.67    0.85
 -12   1   6    9.61    0.98
 -12   1   6    9.70    0.85
  12   0  -6    0.02    0.61
  12   0  -6    0.04    0.51
  12   0  -6   -1.34    0.76
  12   0  -6    0.05    0.52
  12   0  -6   -0.46    0.43
 -12   0   6    0.28    0.44
 -12   0   6   -0.32    0.70
 -12   0   6    0.16    0.53
  12   1  -6   10.53    0.95
  12   1  -6   11.73    1.32
  12   1  -6   10.88    0.96
  12   1  -6    9.88    1.07
 -12  -1   6   10.16    0.94
  12   2  -6   12.12    1.10
  12   2  -6   12.15    1.15
  12   2  -6   11.90    1.53
 -12  -2   6   12.84    1.03
  12   3  -6    9.66    1.02
  12   3  -6   11.83    1.61
 -12  -3   6   11.95    1.05
  12   4  -6    3.52    0.86
  12   4  -6    2.75    1.42
 -12  -4   6    2.68    0.76
  12   5  -6    2.29    0.94
 -12  -5   6    4.07    0.89
  12   6  -6    1.99    0.98
 -12  -6   6    2.57    0.97
  11  -4  -6    9.06    1.00
  11  -3  -6    4.16    0.70
 -11   3   6    4.09    0.60
  11  -2  -6    7.43    0.77
 -11   2   6    7.22    0.81
 -11   2   6    7.42    0.75
  11  -1  -6    2.06    0.54
 -11   1   6    3.83    0.53
 -11   1   6    3.80    0.57
  11   0  -6    0.20    0.40
  11   0  -6    0.65    0.69
  11   0  -6   -0.36    0.57
  11   0  -6    0.54    0.49
  11   0  -6    0.93    0.46
 -11   0   6    0.44    0.65
 -11   0   6    0.44    0.41
 -11   0   6    1.57    0.51
  11   1  -6    1.30    0.53
  11   1  -6    2.35    0.61
  11   1  -6    2.29    0.55
  11   1  -6    1.90    0.89
 -11  -1   6    1.42    0.49
  11   2  -6    5.73    1.21
  11   2  -6    5.56    0.77
  11   2  -6    8.32    0.83
 -11  -2   6    6.84    0.75
  11   3  -6    2.97    1.21
  11   3  -6    3.54    0.72
 -11  -3   6    2.65    0.67
  11   4  -6    8.86    1.51
  11   4  -6    7.59    0.96
 -11  -4   6    8.23    0.94
  11   5  -6    3.22    0.90
  11   5  -6    3.01    1.70
 -11  -5   6    3.01    0.85
  11   6  -6    3.70    1.01
 -11  -6   6    4.32    0.94
  11   7  -6    0.10    1.02
 -11  -7   6    0.79    0.97
  10  -4  -6    2.04    0.70
  10  -3  -6    5.22    0.74
 -10   3   6    6.31    0.67
 -10   3   6    5.52    0.66
  10  -2  -6    8.82    0.82
 -10   2   6   10.45    0.82
 -10   2   6    9.69    0.86
  10  -1  -6   14.60    1.09
 -10   1   6   16.26    1.12
 -10   1   6   15.23    1.23
  10   0  -6    1.28    0.42
  10   0  -6    1.35    0.65
  10   0  -6    1.16    0.49
  10   0  -6    1.17    0.45
 -10   0   6    1.36    0.41
 -10   0   6    1.85    0.65
 -10   0   6    1.66    0.49
  10   1  -6   20.65    1.47
  10   1  -6   18.03    1.31
  10   1  -6   18.11    1.63
  10   1  -6   18.60    1.31
 -10  -1   6   17.48    1.30
 -10  -1   6   19.00    1.63
  10   2  -6    8.48    0.84
  10   2  -6    7.62    1.20
  10   2  -6    8.40    0.86
 -10  -2   6    8.17    0.82
 -10  -2   6    9.50    0.83
  10   3  -6    5.87    0.78
  10   3  -6    7.47    1.29
 -10  -3   6    6.14    0.77
  10   4  -6    2.22    1.34
  10   4  -6    4.28    0.77
 -10  -4   6    2.51    0.71
  10   5  -6    2.88    1.61
  10   5  -6    5.05    0.89
 -10  -5   6    3.88    0.84
  10   6  -6    2.88    0.96
 -10  -6   6    2.12    0.86
 -10  -7   6   -0.03    0.94
   9  -5  -6    1.45    0.77
   9  -4  -6    6.61    0.83
   9  -3  -6    6.29    0.79
  -9   3   6    8.46    0.74
  -9   2   6   11.99    0.90
  -9   2   6   12.11    0.98
   9  -1  -6    6.36    0.59
  -9   1   6    5.36    0.63
  -9   1   6    5.67    0.59
   9   0  -6    0.99    0.41
   9   0  -6    0.45    0.62
   9   0  -6    0.57    0.44
   9   0  -6    0.81    0.39
  -9   0   6    1.71    0.47
  -9   0   6    1.55    0.39
  -9   0   6    0.85    0.64
   9   1  -6    5.55    0.64
   9   1  -6    4.35    0.95
   9   1  -6    5.87    0.69
   9   1  -6    6.00    0.65
  -9  -1   6    5.79    0.88
  -9  -1   6    5.19    0.60
   9   2  -6    4.05    1.02
   9   2  -6    4.74    0.67
   9   2  -6    5.19    0.62
  -9  -2   6    3.33    0.60
  -9  -2   6    4.32    0.59
  -9  -3   6    6.05    0.74
   9   4  -6    6.39    0.88
   9   4  -6    7.25    1.44
  -9  -4   6    8.84    0.88
   9   5  -6    3.64    0.84
   9   5  -6    4.97    1.67
  -9  -5   6    4.25    0.77
   9   6  -6    1.54    0.95
  -9  -6   6    3.67    0.87
   9   7  -6    1.84    1.03
  -9  -7   6    1.58    0.96
  -8   7   6    1.55    0.78
   8  -5  -6    0.49    0.73
   8  -4  -6    0.20    0.64
   8  -3  -6    7.09    0.73
  -8   3   6    6.98    0.70
   8  -2  -6   14.43    1.00
  -8   2   6   13.67    0.99
   8  -1  -6    2.37    0.42
  -8   1   6    3.15    0.43
  -8   1   6    2.21    0.47
   8   0  -6   12.72    1.00
   8   0  -6   12.19    0.91
   8   0  -6   13.43    1.13
   8   0  -6   11.46    0.90
  -8   0   6   12.38    1.15
  -8   0   6   14.65    1.06
  -8   0   6   11.32    0.90
   8   1  -6    2.20    0.53
   8   1  -6    1.97    0.80
   8   1  -6    2.23    0.47
   8   1  -6    2.18    0.51
  -8  -1   6    2.51    0.46
  -8  -1   6    1.92    0.46
  -8  -1   6    2.98    0.76
   8   2  -6   15.13    1.55
   8   2  -6   14.82    1.17
   8   2  -6   14.89    1.14
  -8  -2   6   17.65    1.15
   8   3  -6    7.20    0.78
   8   3  -6    7.74    1.22
  -8  -3   6    7.65    0.78
   8   4  -6    1.94    0.67
   8   4  -6    0.19    1.21
  -8  -4   6    2.74    0.63
   8   5  -6    3.09    0.78
   8   5  -6   -0.07    1.37
  -8  -5   6    3.24    0.77
   8   6  -6    4.82    0.94
   8   6  -6    4.18    1.89
  -8  -6   6    4.12    0.94
   8   7  -6    2.53    1.05
  -8  -7   6    2.49    0.97
  -7   6   6    1.41    0.68
   7  -5  -6    1.31    0.74
   7  -4  -6    6.99    0.81
   7  -3  -6   13.68    0.99
  -7   3   6   12.73    0.97
   7  -2  -6    6.81    0.63
  -7   2   6    6.48    0.61
  -7   1   6    3.41    0.47
   7   0  -6    9.98    0.79
   7   0  -6    8.76    0.70
   7   0  -6    7.36    0.71
   7   0  -6    8.53    0.88
  -7   0   6   10.35    0.93
  -7   0   6    9.84    0.85
   7   1  -6    4.03    0.49
   7   1  -6    2.99    0.79
   7   1  -6    3.20    0.50
   7   1  -6    2.79    0.52
  -7  -1   6    3.34    0.48
  -7  -1   6    3.93    0.73
  -7  -1   6    4.13    0.48
   7   2  -6    7.29    0.72
   7   2  -6    6.50    1.09
   7   2  -6    7.64    0.88
   7   2  -6    6.23    0.74
  -7  -2   6    8.70    0.72
   7   3  -6   13.58    1.24
   7   3  -6   13.15    1.02
   7   3  -6   12.69    1.47
  -7  -3   6   12.71    1.00
   7   4  -6    6.42    1.30
   7   4  -6    6.33    0.81
  -7  -4   6    5.97    0.79
  -7  -4   6    6.80    0.84
   7   5  -6    3.24    0.80
   7   5  -6    4.20    1.41
  -7  -5   6    2.35    0.74
   7   6  -6    1.80    1.69
   7   6  -6    2.53    0.91
  -7  -6   6    2.03    0.82
  -7  -7   6    2.14    0.92
   7   8  -6    1.78    1.10
  -7  -8   6    1.82    1.04
  -6   6   6    2.04    0.79
   6  -5  -6    3.13    0.84
   6  -5  -6    5.23    0.82
  -6   5   6    4.92    0.76
   6  -4  -6    7.45    0.82
   6  -3  -6    4.86    0.61
  -6   3   6    4.41    0.56
   6  -2  -6    9.46    0.76
  -6   2   6   10.30    0.75
   6   0  -6    4.29    0.51
   6   0  -6    6.40    0.67
   6   0  -6    5.30    0.63
  -6   0   6    6.67    0.70
  -6   0   6    5.28    0.57
   6   1  -6    6.90    0.61
   6   1  -6    6.82    0.88
   6   1  -6    6.71    0.62
   6   1  -6    6.41    0.70
  -6  -1   6    7.43    0.62
  -6  -1   6    7.22    0.86
  -6  -1   6    6.51    0.60
   6   2  -6    8.78    0.97
   6   2  -6   10.45    1.19
   6   2  -6   10.14    0.80
   6   2  -6    8.46    0.81
  -6  -2   6    9.95    0.78
   6   3  -6    3.41    0.63
   6   3  -6    2.98    0.63
   6   3  -6    4.48    1.05
   6   3  -6    4.70    0.71
  -6  -3   6    4.24    0.65
  -6  -3   6    4.72    0.61
   6   4  -6   11.45    1.36
   6   4  -6    8.80    1.03
  -6  -4   6    6.88    0.92
  -6  -4   6    8.25    0.83
   6   5  -6    7.61    1.51
  -6  -5   6    6.30    0.85
   6   6  -6    3.32    1.54
  -6  -6   6    2.10    0.79
  -6  -7   6    1.32    0.90
  -6  -8   6    0.53    0.96
  -5   6   6    1.63    0.87
   5  -5  -6    0.78    0.80
   5  -5  -6    4.43    0.78
  -5   5   6    2.83    0.94
  -5   5   6    3.09    0.78
   5  -4  -6    0.76    0.57
  -5   4   6    1.69    0.52
  -5   4   6    1.86    0.59
   5  -3  -6    1.07    0.51
  -5   3   6    1.75    0.48
   5  -2  -6    8.75    0.73
  -5   2   6    9.98    0.71
   5   0  -6   14.13    1.01
   5   0  -6   11.95    0.98
   5   0  -6   12.61    1.03
  -5   0   6   12.81    1.02
  -5   0   6   14.66    1.05
   5   1  -6   13.42    0.94
   5   1  -6   13.11    1.20
   5   1  -6   13.60    0.92
  -5  -1   6   13.57    1.17
  -5  -1   6   14.08    0.92
   5   2  -6    8.55    0.75
   5   2  -6    6.83    0.89
   5   2  -6    9.54    1.10
   5   2  -6    9.28    0.78
  -5  -2   6   11.28    0.75
  -5  -2   6    8.92    1.01
   5   3  -6    1.99    0.60
   5   3  -6    1.31    0.55
   5   3  -6    1.42    0.96
  -5  -3   6    1.17    0.52
  -5  -3   6    1.99    0.55
   5   4  -6    3.21    0.68
   5   4  -6    2.74    1.03
  -5  -4   6    2.54    0.62
  -5  -4   6    2.89    0.64
   5   5  -6    4.45    1.27
  -5  -5   6    3.44    0.74
   5   6  -6    2.85    1.43
  -5  -6   6    1.70    0.79
  -5  -7   6    3.32    0.95
  -5  -8   6    0.62    0.93
   4  -6  -6    3.12    0.87
  -4   6   6    3.67    0.97
   4  -5  -6    1.16    0.61
   4  -5  -6    1.86    0.68
  -4   5   6    1.52    0.96
  -4   5   6    1.21    0.80
   4  -4  -6    1.42    0.59
   4  -4  -6    1.60    0.53
   4  -4  -6    1.27    0.67
  -4   4   6    1.68    0.54
  -4   4   6    1.61    0.70
  -4   4   6    0.62    0.73
   4  -3  -6    1.48    0.50
  -4   3   6    2.12    0.50
   4  -2  -6    2.70    0.45
  -4   2   6    4.14    0.44
   4   0  -6    8.49    0.73
  -4   0   6    9.45    0.72
  -4   0   6    8.44    0.72
  -4   0   6    8.74    0.71
   4   1  -6    6.73    0.56
   4   1  -6    6.54    0.65
   4   1  -6    7.12    0.71
   4   1  -6    6.86    0.76
  -4  -1   6    6.94    0.75
  -4  -1   6    7.14    0.54
   4   2  -6    3.30    0.54
   4   2  -6    1.55    0.79
   4   2  -6    3.71    0.53
  -4  -2   6    4.54    0.51
  -4  -2   6    2.60    0.71
  -4  -2   6    3.49    0.52
   4   3  -6    1.71    0.57
   4   3  -6    2.01    0.89
   4   3  -6    2.83    0.56
  -4  -3   6    2.55    0.54
  -4  -3   6    2.76    0.55
   4   4  -6    1.77    0.95
  -4  -4   6    2.70    0.61
  -4  -4   6    1.76    0.57
   4   5  -6    1.99    1.13
  -4  -5   6    2.43    0.67
  -4  -5   6    2.60    0.71
   4   6  -6    5.82    1.42
  -4  -6   6    4.93    0.85
  -4  -7   6    2.68    0.94
   3  -6  -6    0.36    0.78
  -3   6   6    0.50    0.94
   3  -5  -6    0.00    0.58
   3  -5  -6    0.88    0.66
  -3   5   6    1.37    0.93
   3  -4  -6    0.98    0.54
   3  -4  -6    0.48    0.69
   3  -4  -6    0.47    0.49
  -3   4   6    2.24    0.76
  -3   4   6    1.87    0.53
  -3   4   6    0.82    0.77
   3  -3  -6   10.04    0.95
   3  -3  -6    9.69    0.97
   3  -3  -6   11.15    0.84
  -3   3   6    9.98    1.08
  -3   3   6    9.57    0.81
  -3   3   6    9.43    1.02
   3  -2  -6    6.32    0.61
  -3   2   6    8.07    0.60
   3   0  -6   61.37    4.30
  -3   0   6   65.65    4.30
  -3   0   6   60.99    4.22
   3   1  -6   22.09    1.61
   3   1  -6   20.79    1.61
   3   1  -6   20.87    1.55
   3   1  -6   22.02    1.38
  -3  -1   6   20.88    1.60
  -3  -1   6   21.77    1.60
  -3  -1   6   23.56    1.37
   3   2  -6    6.34    0.71
   3   2  -6   10.89    0.83
   3   2  -6    7.06    0.78
   3   2  -6    7.49    0.93
  -3  -2   6    8.60    0.76
  -3  -2   6    7.74    0.89
  -3  -2   6    7.66    0.66
   3   3  -6   10.85    1.20
   3   3  -6   10.54    1.04
   3   3  -6   10.53    0.94
  -3  -3   6   11.31    1.01
  -3  -3   6   11.95    0.90
   3   4  -6    1.81    0.63
   3   4  -6    1.46    0.89
  -3  -4   6    1.97    0.55
  -3  -4   6    1.47    0.53
   3   5  -6    0.73    1.04
  -3  -5   6    1.02    0.60
  -3  -5   6    1.06    0.61
   3   6  -6    2.57    1.25
  -3  -6   6    2.35    0.73
  -3  -7   6    0.01    0.77
   2  -7  -6    1.99    0.99
  -2   7   6    1.15    1.20
   2  -6  -6    0.94    0.85
  -2   6   6    1.75    1.11
   2  -5  -6   -0.14    0.62
   2  -5  -6    0.30    0.69
  -2   5   6    1.33    0.97
   2  -4  -6    2.38    0.58
   2  -4  -6    1.51    0.78
   2  -4  -6    3.69    0.63
  -2   4   6    3.18    0.87
  -2   4   6    3.39    0.86
   2  -3  -6    2.51    0.61
   2  -3  -6    3.07    0.55
   2  -3  -6    2.74    0.52
  -2   3   6    2.10    0.48
  -2   3   6    3.80    0.78
  -2   3   6    3.21    0.69
   2  -2  -6   16.26    1.27
   2  -2  -6   17.18    1.11
   2  -2  -6   15.73    1.27
   2  -1  -6    0.63    0.25
  -2   1   6    0.58    0.22
   2   0  -6   13.60    1.01
  -2   0   6   14.09    1.00
   2   1  -6    0.48    0.25
   2   1  -6    0.44    0.28
   2   1  -6   -0.39    0.35
  -2  -1   6    0.17    0.31
  -2  -1   6    0.36    0.25
  -2  -1   6    0.09    0.22
  -2  -1   6    0.57    0.24
   2   2  -6   18.79    1.22
   2   2  -6   14.53    1.33
   2   2  -6   14.30    1.10
  -2  -2   6   16.50    1.26
  -2  -2   6   15.07    1.09
  -2  -2   6   15.39    1.32
   2   3  -6    2.71    0.80
   2   3  -6    3.60    0.61
  -2  -3   6    3.64    0.54
  -2  -3   6    3.44    0.58
   2   4  -6    2.46    0.83
  -2  -4   6    3.10    0.61
  -2  -4   6    2.35    0.60
   2   5  -6    1.36    0.96
  -2  -5   6    2.17    0.65
  -2  -5   6    2.61    0.70
   2   6  -6    1.56    1.13
  -2  -6   6    0.67    0.67
   2   7  -6    0.54    1.32
  -2  -7   6    1.63    0.79
   1  -6  -6   -0.03    0.80
  -1   6   6    0.17    1.17
   1  -5  -6    2.21    0.74
   1  -5  -6    1.69    0.66
  -1   5   6    1.48    1.01
   1  -4  -6    2.62    0.60
   1  -4  -6    1.72    0.57
   1  -4  -6    2.55    0.81
  -1   4   6    2.11    0.92
  -1   4   6    1.58    0.86
   1  -3  -6    7.44    0.70
   1  -3  -6    6.15    0.83
   1  -3  -6    6.64    0.77
  -1   3   6    7.35    0.94
  -1   3   6    6.97    0.65
  -1   3   6    7.08    0.91
   1  -2  -6    2.75    0.53
   1  -2  -6    3.51    0.46
   1  -2  -6    2.89    0.45
  -1   2   6    3.78    0.49
  -1   2   6    3.97    0.45
  -1   2   6    3.38    0.54
  -1   2   6    3.38    0.40
  -1   2   6    3.19    0.48
   1  -1  -6    3.23    0.35
   1  -1  -6    3.01    0.28
   1  -1  -6    2.66    0.30
   1  -1  -6    2.54    0.33
  -1   1   6    3.56    0.35
  -1   1   6    2.71    0.28
  -1   1   6    2.83    0.31
   1   0  -6    1.11    0.24
  -1   0   6    1.10    0.20
   1   1  -6    3.61    0.34
   1   1  -6    3.31    0.43
   1   1  -6    3.53    0.36
  -1  -1   6    3.48    0.32
  -1  -1   6    3.18    0.34
  -1  -1   6    3.18    0.41
   1   2  -6    1.74    0.60
   1   2  -6    3.12    0.45
   1   2  -6    1.47    0.45
  -1  -2   6    2.36    0.44
  -1  -2   6    3.05    0.57
  -1  -2   6    1.85    0.47
  -1  -2   6    2.97    0.41
   1   3  -6    8.24    0.97
   1   3  -6    7.36    0.76
  -1  -3   6    7.55    0.81
  -1  -3   6    6.93    0.73
   1   4  -6    4.84    0.60
   1   4  -6    2.55    0.84
  -1  -4   6    1.94    0.57
  -1  -4   6    2.41    0.60
   1   5  -6    2.83    0.96
   1   5  -6    3.40    0.72
  -1  -5   6    2.38    0.64
  -1  -5   6    1.54    0.61
   1   6  -6    0.05    1.06
  -1  -6   6    1.01    0.73
  -1  -7   6    1.46    0.80
   0  -6  -6    1.32    0.80
   0   6   6    2.47    1.25
   0  -5  -6    6.58    0.85
   0  -5  -6    6.39    0.87
   0   5   6    5.81    1.22
   0  -4  -6    3.94    0.65
   0  -4  -6    2.26    0.61
   0   4   6    2.89    0.63
   0   4   6    2.91    0.98
   0  -3  -6    1.35    0.66
   0  -3  -6    2.01    0.54
   0  -3  -6    3.21    0.57
   0   3   6    2.84    0.53
   0   3   6    1.85    0.47
   0   3   6    2.72    0.57
   0   3   6    2.11    0.80
   0   3   6    2.63    0.72
   0  -2  -6   16.50    1.12
   0  -2  -6   17.25    1.32
   0  -2  -6   16.03    1.29
   0   2   6   15.34    1.29
   0   2   6   15.85    1.09
   0   2   6   16.92    1.27
   0   2   6   16.71    1.11
   0   2   6   16.12    1.33
   0  -1  -6   37.85    2.20
   0  -1  -6   34.81    2.20
   0  -1  -6   37.76    2.49
   0   1   6   35.55    2.20
   0   1   6   35.94    2.48
   0   1   6   33.81    2.19
   0   1   6   34.19    2.57
   0   0  -6   76.71    5.03
   0   0  -6   77.06    4.46
   0   0   6   73.09    5.03
   0   0   6   66.97    4.45
   0   1  -6   36.34    2.45
   0   1  -6   33.82    2.38
   0   1  -6   34.21    2.16
   0  -1   6   35.11    2.38
   0  -1   6   35.48    2.45
   0  -1   6   35.39    2.16
   0   2  -6   17.77    1.22
   0   2  -6   18.31    1.32
   0   2  -6   18.50    1.42
   0  -2   6   18.45    1.22
   0  -2   6   17.55    1.31
   0  -2   6   18.37    1.40
   0   3  -6    1.84    0.69
   0   3  -6    2.86    0.57
   0   3  -6    3.48    0.52
   0  -3   6    2.92    0.58
   0   4  -6    2.03    0.80
   0   4  -6    3.27    0.58
   0  -4   6    2.61    0.57
   0  -4   6    2.78    0.60
   0   5  -6    7.35    1.10
   0   5  -6    8.77    0.89
   0  -5   6    6.07    0.81
   0  -5   6    5.97    0.79
   0   6  -6    1.66    1.07
   0  -6   6    2.50    0.70
   0  -7   6    2.88    0.88
   0  -8   6    1.43    0.94
  -1  -7  -6    2.41    1.00
   1   7   6    1.86    1.03
  -1  -6  -6    1.15    0.81
   1   6   6    2.26    0.83
   1   6   6    0.83    1.23
  -1  -5  -6    2.92    0.74
  -1  -5  -6    1.39    0.64
   1   5   6    3.28    1.11
   1   5   6    2.79    0.73
  -1  -4  -6    3.09    0.65
  -1  -4  -6    1.32    0.58
   1   4   6    2.77    1.00
   1   4   6    2.94    0.64
   1   4   6    3.27    0.65
  -1  -3  -6    6.46    0.96
  -1  -3  -6    6.80    0.91
  -1  -3  -6    8.36    0.75
  -1  -3  -6    7.05    0.84
   1   3   6    6.72    0.72
   1   3   6    7.13    0.71
   1   3   6    5.77    0.95
   1   3   6    7.64    1.01
   1   3   6    7.77    0.82
  -1  -2  -6    4.83    0.52
  -1  -2  -6    4.17    0.64
  -1  -2  -6    4.19    0.48
  -1  -2  -6    3.53    0.53
   1   2   6    4.47    0.56
   1   2   6    3.62    0.64
   1   2   6    4.60    0.52
   1   2   6    5.10    0.49
   1   2   6    3.02    0.56
  -1  -1  -6    3.16    0.33
  -1  -1  -6    2.67    0.40
   1   1   6    2.70    0.33
   1   1   6    3.18    0.34
   1   1   6    2.84    0.37
  -1   0  -6    0.91    0.26
  -1   0  -6    0.62    0.22
   1   0   6    0.71    0.22
   1   0   6    0.68    0.21
  -1   1  -6    3.10    0.40
  -1   1  -6    3.41    0.35
  -1   1  -6    3.14    0.36
   1  -1   6    3.11    0.33
   1  -1   6    2.99    0.34
   1  -1   6    2.78    0.36
  -1   2  -6    2.57    0.41
  -1   2  -6    3.20    0.54
  -1   2  -6    2.50    0.45
   1  -2   6    2.99    0.51
   1  -2   6    3.39    0.46
   1  -2   6    2.19    0.38
  -1   3  -6    7.38    0.79
  -1   3  -6    7.20    0.87
  -1   3  -6    8.85    0.76
   1  -3   6    7.05    0.76
  -1   4  -6    3.81    0.56
  -1   4  -6    3.33    0.77
   1  -4   6    3.21    0.65
  -1   5  -6    4.07    0.66
  -1   5  -6    2.32    0.93
   1  -5   6    2.24    0.61
   1  -5   6    2.08    0.65
  -1   6  -6    1.80    1.09
   1  -6   6    0.52    0.66
   1  -7   6    2.13    0.79
   1  -8   6    1.59    0.96
  -2  -7  -6    1.74    0.99
   2   7   6    0.54    1.01
  -2  -6  -6    2.27    0.84
   2   6   6    1.53    0.83
   2   6   6    2.47    1.31
  -2  -5  -6    1.08    0.71
  -2  -5  -6    2.40    0.69
   2   5   6    2.29    1.16
   2   5   6    2.31    0.72
  -2  -4  -6    2.74    0.64
  -2  -4  -6    3.64    0.62
   2   4   6    3.26    0.69
   2   4   6    2.78    0.65
   2   4   6    3.60    1.05
  -2  -3  -6    2.11    0.76
  -2  -3  -6    1.99    0.50
  -2  -3  -6    2.85    0.82
  -2  -3  -6    2.58    0.55
  -2  -3  -6    2.85    0.55
   2   3   6    2.71    0.62
   2   3   6    3.14    0.54
   2   3   6    2.79    0.58
   2   3   6    4.37    0.93
   2   3   6    3.06    0.80
  -2  -2  -6   17.59    1.21
  -2  -2  -6   16.73    1.20
  -2  -2  -6   17.53    1.43
   2   2   6   18.27    1.43
   2   2   6   18.38    1.21
   2   2   6   16.60    1.40
   2   2   6   18.03    1.21
   2   2   6   16.86    1.39
  -2  -1  -6    0.54    0.34
  -2  -1  -6    0.17    0.28
   2   1   6    0.81    0.28
   2   1   6    0.30    0.29
   2   1   6    0.69    0.29
  -2   0  -6   12.97    0.89
  -2   0  -6   13.93    1.00
   2   0   6   13.17    0.99
   2   0   6   13.16    0.89
  -2   1  -6    0.49    0.31
  -2   1  -6    0.48    0.29
  -2   1  -6    0.28    0.25
   2  -1   6    0.37    0.26
   2  -1   6   -0.05    0.26
   2  -1   6    0.24    0.21
  -2   2  -6   17.00    1.23
  -2   2  -6   16.47    1.30
  -2   2  -6   17.59    1.16
   2  -2   6   16.93    1.22
   2  -2   6   17.21    1.16
   2  -2   6   16.00    1.31
  -2   3  -6    4.16    0.53
  -2   3  -6    3.47    0.58
  -2   3  -6    2.37    0.67
   2  -3   6    5.25    0.56
   2  -3   6    2.97    0.57
  -2   4  -6    2.23    0.71
  -2   4  -6    3.49    0.55
   2  -4   6    3.67    0.59
  -2   5  -6    2.29    0.58
  -2   5  -6    1.16    0.83
   2  -5   6    1.29    0.63
  -2   6  -6    2.67    0.69
  -2   6  -6    3.14    0.98
   2  -6   6    0.31    0.68
   2  -7   6    1.14    0.77
   2  -8   6    1.81    0.89
  -3  -7  -6    0.29    0.95
   3   7   6    1.01    0.97
  -3  -6  -6    2.09    0.81
   3   6   6    1.53    0.82
   3   6   6    1.00    1.35
  -3  -5  -6    1.55    0.66
   3   5   6    0.44    1.15
   3   5   6    0.12    0.70
  -3  -4  -6    1.83    0.57
  -3  -4  -6    2.43    0.61
   3   4   6    2.21    0.67
   3   4   6    2.89    0.65
   3   4   6    1.89    0.99
  -3  -3  -6   11.35    0.93
  -3  -3  -6   10.75    0.89
  -3  -3  -6   11.20    1.23
   3   3   6    9.77    1.04
   3   3   6   12.12    1.29
   3   3   6   10.08    0.94
   3   3   6   10.10    0.90
  -3  -2  -6    8.09    0.73
  -3  -2  -6    6.40    0.82
  -3  -2  -6    7.21    0.67
   3   2   6    6.76    0.84
   3   2   6    5.74    0.79
   3   2   6    8.14    0.74
   3   2   6    6.69    0.67
  -3  -1  -6   20.53    1.36
  -3  -1  -6   19.69    1.54
   3   1   6   23.23    1.37
   3   1   6   19.33    1.53
   3   1   6   20.76    1.37
  -3   0  -6   55.23    3.36
  -3   0  -6   54.61    3.78
   3   0   6   55.17    3.36
   3   0   6   53.40    3.77
  -3   1  -6   20.65    1.31
  -3   1  -6   20.37    1.40
  -3   1  -6   19.93    1.45
   3  -1   6   19.62    1.45
   3  -1   6   19.64    1.31
   3  -1   6   19.37    1.39
  -3   2  -6    9.78    0.80
  -3   2  -6    9.48    0.88
  -3   2  -6   10.36    0.82
   3  -2   6   11.04    0.80
   3  -2   6    8.82    0.80
   3  -2   6    9.35    0.89
  -3   3  -6   10.19    1.02
  -3   3  -6   10.70    0.91
   3  -3   6   11.61    0.88
   3  -3   6   10.80    0.91
  -3   4  -6    2.04    0.49
  -3   4  -6    1.51    0.64
   3  -4   6    2.13    0.55
  -3   5  -6    1.03    0.77
  -3   5  -6    0.99    0.57
   3  -5   6    1.14    0.61
  -3   6  -6    1.88    0.70
  -3   6  -6    2.30    0.94
   3  -6   6    1.23    0.70
   3  -7   6    0.40    0.80
   3  -8   6    0.17    0.88
  -4  -7  -6    1.57    0.97
   4   7   6    3.75    1.67
   4   7   6    1.28    0.97
  -4  -6  -6    2.74    0.83
   4   6   6    0.74    1.38
   4   6   6    3.77    0.90
  -4  -5  -6    2.63    0.74
   4   5   6    2.08    0.74
   4   5   6    2.56    1.29
  -4  -4  -6    2.37    0.63
   4   4   6    2.56    0.72
   4   4   6    1.64    0.65
   4   4   6    1.70    1.04
  -4  -3  -6    3.46    0.90
  -4  -3  -6    2.18    0.60
   4   3   6    3.32    0.66
   4   3   6    2.77    0.97
   4   3   6    3.76    0.71
  -4  -2  -6    3.10    0.51
  -4  -2  -6    3.91    0.56
  -4  -2  -6    3.62    0.68
   4   2   6    4.20    0.59
   4   2   6    2.58    0.64
   4   2   6    3.22    0.73
   4   2   6    2.99    0.53
  -4  -1  -6    7.12    0.77
  -4  -1  -6    8.63    0.68
   4   1   6    7.57    0.68
   4   1   6    6.33    0.74
   4   1   6    5.82    0.69
  -4   0  -6    8.27    0.73
  -4   0  -6    7.66    0.66
   4   0   6    7.91    0.71
   4   0   6    7.68    0.66
  -4   1  -6    7.95    0.72
  -4   1  -6    7.40    0.67
  -4   1  -6    9.06    0.68
   4  -1   6    7.13    0.71
   4  -1   6    7.34    0.67
   4  -1   6    7.49    0.65
  -4   2  -6    4.52    0.56
  -4   2  -6    3.96    0.49
  -4   2  -6    3.26    0.53
   4  -2   6    3.89    0.52
   4  -2   6    2.52    0.52
   4  -2   6    4.13    0.46
  -4   3  -6    2.77    0.49
  -4   3  -6    2.10    0.58
   4  -3   6    2.55    0.43
   4  -3   6    2.44    0.56
  -4   4  -6    3.03    0.52
  -4   4  -6    2.30    0.65
   4  -4   6    3.10    0.57
  -4   5  -6    1.81    0.60
  -4   5  -6    2.82    0.81
   4  -5   6    2.50    0.65
  -4   6  -6    4.40    1.03
  -4   6  -6    4.96    0.79
   4  -6   6    3.75    0.80
   4  -7   6    0.94    0.82
   4  -8   6    0.44    0.88
  -5  -8  -6    1.39    1.06
  -5  -7  -6    2.62    1.00
   5   7   6    3.11    1.01
  -5  -6  -6    1.42    0.81
   5   6   6    2.32    0.85
   5   6   6    1.58    1.42
  -5  -5  -6    3.32    0.76
   5   5   6    4.43    1.38
   5   5   6    2.78    0.82
  -5  -4  -6    1.76    0.62
   5   4   6    3.37    1.05
   5   4   6    3.02    0.68
  -5  -3  -6    1.40    0.56
  -5  -3  -6    0.56    0.83
   5   3   6    1.90    0.62
   5   3   6    2.13    0.98
   5   3   6    2.29    0.66
  -5  -2  -6    7.97    0.86
  -5  -2  -6    9.10    0.85
  -5  -2  -6   10.43    1.06
   5   2   6    9.40    0.87
   5   2   6   10.24    1.10
   5   2   6    9.87    0.88
  -5  -1  -6   12.20    0.95
  -5  -1  -6   11.20    1.06
   5   1   6   11.47    1.05
   5   1   6   13.67    0.97
  -5   0  -6   10.48    0.83
  -5   0  -6   10.91    0.91
   5   0   6    9.40    0.83
   5   0   6   10.39    0.89
  -5   1  -6   12.55    1.03
  -5   1  -6   13.50    0.99
  -5   1  -6   12.34    0.94
   5  -1   6   11.83    1.01
   5  -1   6   12.41    0.95
   5  -1   6   12.77    0.97
  -5   2  -6    9.09    0.79
  -5   2  -6    7.78    0.81
  -5   2  -6    9.42    0.79
   5  -2   6    9.09    0.77
   5  -2   6    8.02    0.77
   5  -2   6    8.82    0.82
  -5   3  -6    2.56    0.46
  -5   3  -6    1.72    0.55
   5  -3   6    1.73    0.39
   5  -3   6    1.47    0.54
  -5   4  -6    2.83    0.68
  -5   4  -6    3.39    0.54
   5  -4   6    3.38    0.63
  -5   5  -6    4.99    0.90
  -5   5  -6    5.11    0.68
   5  -5   6    4.35    0.75
  -5   6  -6    3.79    0.73
   5  -6   6    4.81    0.81
   5  -7   6    1.17    0.84
   5  -8   6    0.64    0.97
  -6  -7  -6    1.87    0.94
   6   7   6    3.30    1.07
  -6  -6  -6    2.45    0.82
   6   6   6    3.50    0.91
   6   6   6    2.82    1.53
  -6  -5  -6    5.64    0.91
   6   5   6    4.79    1.43
   6   5   6    7.88    0.96
  -6  -4  -6    7.92    0.89
   6   4   6    8.25    0.92
   6   4   6    7.90    1.28
  -6  -3  -6    3.20    0.94
  -6  -3  -6    4.56    0.69
   6   3   6    4.51    0.73
   6   3   6    4.84    1.06
  -6  -2  -6    9.98    1.08
  -6  -2  -6    8.58    0.88
  -6  -2  -6    9.41    0.89
   6   2   6    9.72    1.12
   6   2   6    9.97    0.91
   6   2   6    8.08    0.86
  -6  -1  -6    5.49    0.65
  -6  -1  -6    6.50    0.75
   6   1   6    6.09    0.74
   6   1   6    5.89    0.67
  -6   0  -6    5.52    0.65
  -6   0  -6    5.20    0.60
   6   0   6    5.45    0.60
   6   0   6    4.90    0.51
   6   0   6    3.89    0.59
  -6   1  -6    5.91    0.63
  -6   1  -6    6.44    0.68
  -6   1  -6    6.36    0.66
   6  -1   6    6.21    0.66
   6  -1   6    5.38    0.65
   6  -1   6    5.23    0.62
  -6   2  -6    7.50    0.79
  -6   2  -6    8.79    0.79
  -6   2  -6    8.14    0.76
   6  -2   6    7.83    0.78
   6  -2   6    7.62    0.77
   6  -2   6    8.73    0.74
  -6   3  -6    3.95    0.56
  -6   3  -6    4.25    0.62
   6  -3   6    4.29    0.65
   6  -3   6    4.24    0.51
  -6   4  -6    7.95    0.87
  -6   4  -6    7.45    0.77
   6  -4   6    7.80    0.84
  -6   5  -6    6.21    0.95
  -6   5  -6    6.74    0.77
   6  -5   6    6.49    0.83
  -6   6  -6    2.48    0.93
  -6   6  -6    1.95    0.70
   6  -6   6    2.87    0.77
   6  -7   6    2.35    0.92
   6  -8   6    0.68    0.96
  -7  -7  -6    3.07    1.04
  -7  -6  -6    2.18    0.89
   7   6   6    3.28    0.97
  -7  -5  -6    3.41    0.77
   7   5   6    2.61    1.45
   7   5   6    2.58    0.82
  -7  -4  -6    6.57    0.82
   7   4   6    5.54    0.84
   7   4   6    4.28    1.22
  -7  -3  -6   11.94    1.04
  -7  -3  -6   14.00    1.39
   7   3   6   11.25    1.07
   7   3   6   11.84    1.43
  -7  -2  -6    6.41    0.88
   7   2   6    6.14    0.94
   7   2   6    6.51    0.77
  -7  -1  -6    3.18    0.64
  -7  -1  -6    3.00    0.53
   7   1   6    2.41    0.55
  -7   0  -6    7.67    0.78
  -7   0  -6    7.74    0.88
   7   0   6    9.26    0.79
   7   0   6    8.92    0.85
   7   0   6    8.18    0.79
  -7   1  -6    3.04    0.55
  -7   1  -6    2.29    0.54
  -7   1  -6    2.19    0.46
   7  -1   6    1.77    0.52
   7  -1   6    2.30    0.48
   7  -1   6    2.72    0.44
  -7   2  -6    6.53    0.74
  -7   2  -6    6.09    0.71
   7  -2   6    7.29    0.72
   7  -2   6    6.63    0.68
   7  -2   6    6.45    0.71
  -7   3  -6   11.85    1.04
  -7   3  -6   12.07    1.01
   7  -3   6   12.59    1.01
   7  -3   6   11.94    0.97
  -7   4  -6    6.95    0.76
  -7   4  -6    6.82    0.84
   7  -4   6    6.16    0.81
  -7   5  -6    3.59    0.82
  -7   5  -6    3.17    0.66
   7  -5   6    3.52    0.74
  -7   6  -6    3.64    0.73
   7  -6   6    0.83    0.80
   7  -7   6    1.09    0.87
   7  -8   6    1.14    0.97
  -8  -7  -6    1.11    1.01
  -8  -6  -6    3.10    0.86
   8   6   6    2.71    1.68
   8   6   6    2.01    0.96
  -8  -5  -6    1.30    0.74
   8   5   6    0.11    0.81
   8   5   6    2.21    1.38
  -8  -4  -6    1.18    0.68
   8   4   6    1.27    1.13
   8   4   6    1.92    0.74
  -8  -3  -6    6.70    1.07
  -8  -3  -6    6.29    0.76
   8   3   6    5.38    1.15
   8   3   6    6.31    0.81
  -8  -2  -6   12.39    1.26
   8   2   6   13.46    1.12
   8   2   6   10.56    1.31
  -8  -1  -6    1.55    0.64
   8   1   6    1.02    0.52
  -8   0  -6   10.84    1.03
   8   0   6    9.75    0.94
   8   0   6   11.15    0.92
  -8   1  -6    1.53    0.46
  -8   1  -6    1.61    0.55
   8  -1   6    1.15    0.43
   8  -1   6    1.86    0.50
   8  -1   6    1.82    0.53
  -8   2  -6   12.68    1.08
  -8   2  -6   13.44    1.05
   8  -2   6   13.05    1.03
   8  -2   6   11.67    1.01
  -8   3  -6    6.06    0.66
  -8   3  -6    6.07    0.74
   8  -3   6    5.71    0.66
   8  -3   6    6.41    0.73
  -8   4  -6    1.72    0.65
  -8   4  -6    1.51    0.56
   8  -4   6    1.85    0.66
  -8   5  -6    1.49    0.75
  -8   5  -6    2.25    0.61
   8  -5   6    1.99    0.74
  -8   6  -6    2.18    0.77
   8  -6   6    2.59    0.82
   8  -7   6    1.98    0.93
   9   7   6    2.51    1.10
  -9  -6  -6    2.64    0.90
   9   6   6    3.28    1.01
  -9  -5  -6    0.79    0.73
   9   5   6   -0.17    1.37
   9   5   6    2.38    0.84
  -9  -4  -6    5.47    0.83
   9   4   6    6.40    1.29
   9   4   6    6.87    0.93
  -9  -3  -6    2.42    1.04
  -9  -3  -6    4.62    0.72
   9   3   6    6.02    0.79
   9   3   6    4.76    1.15
  -9  -2  -6    3.23    0.82
   9   2   6    4.92    0.92
   9   2   6    4.47    0.69
  -9  -1  -6    3.25    0.73
   9   1   6    3.36    0.84
   9   1   6    4.49    0.64
  -9   0  -6    1.04    0.60
   9   0   6    1.21    0.45
   9   0   6    1.33    0.53
  -9   1  -6    5.25    0.61
  -9   1  -6    5.25    0.70
   9  -1   6    4.73    0.66
   9  -1   6    4.00    0.57
  -9   2  -6    5.16    0.70
  -9   2  -6    6.36    0.67
   9  -2   6    4.53    0.58
   9  -2   6    4.83    0.70
  -9   3  -6    6.88    0.79
   9  -3   6    6.71    0.72
   9  -3   6    5.09    0.79
  -9   4  -6    5.57    0.85
  -9   4  -6    7.98    0.80
   9  -4   6    5.87    0.86
  -9   5  -6    4.23    0.83
  -9   5  -6    3.36    0.67
   9  -5   6    1.37    0.73
  -9   6  -6    1.53    0.73
   9  -6   6    2.66    0.86
   9  -7   6    1.35    0.93
 -10  -7  -6   -0.40    0.95
  10   7   6    1.82    1.14
 -10  -6  -6    2.62    0.90
  10   6   6    1.60    1.04
 -10  -5  -6    3.27    0.84
  10   5   6    4.92    0.97
  10   5   6    2.45    1.51
 -10  -4  -6    3.04    0.70
  10   4   6    1.64    1.18
  10   4   6    2.13    0.76
 -10  -3  -6    6.07    1.13
  10   3   6    4.51    1.18
  10   3   6    4.19    0.80
 -10  -2  -6    6.85    1.05
  10   2   6    7.42    0.84
  10   2   6    8.64    1.09
 -10  -1  -6   15.32    1.36
  10   1   6   13.66    1.21
  10   1   6   12.88    1.35
  10   1   6   17.65    1.24
 -10   0  -6    1.76    0.63
  10   0   6    1.24    0.55
  10   0   6    0.96    0.44
 -10   1  -6   13.80    1.13
 -10   1  -6   12.70    1.18
  10  -1   6   13.13    1.10
  10  -1   6   14.67    1.13
 -10   2  -6    8.03    0.87
 -10   2  -6    7.71    0.81
  10  -2   6    7.87    0.84
  10  -2   6    7.16    0.76
 -10   3  -6    4.92    0.68
 -10   3  -6    5.63    0.78
  10  -3   6    5.32    0.77
 -10   4  -6    3.91    0.72
 -10   4  -6    2.32    0.62
  10  -4   6    3.67    0.79
 -10   5  -6    4.52    0.86
 -10   5  -6    3.37    0.70
  10  -5   6    1.93    0.85
 -10   6  -6    3.37    0.80
  10  -6   6    3.02    0.92
  10  -7   6    0.90    0.97
 -11  -7  -6   -0.01    0.91
 -11  -6  -6    0.03    0.89
  11   6   6    2.55    1.06
 -11  -5  -6    3.50    0.89
  11   5   6    1.12    0.91
 -11  -4  -6    6.71    0.91
  11   4   6    8.07    0.99
  11   4   6    5.09    1.40
 -11  -3  -6    2.74    1.06
  11   3   6    3.06    1.18
  11   3   6    2.44    0.75
 -11  -2  -6    5.44    1.02
  11   2   6    5.86    0.77
  11   2   6    4.02    1.02
 -11  -1  -6    1.78    0.73
  11   1   6    0.90    0.72
  11   1   6    1.17    0.57
  11   1   6    1.11    0.55
 -11   0  -6    0.70    0.62
  11   0   6    0.86    0.57
  11   0   6    0.43    0.43
 -11   1  -6    0.42    0.63
 -11   1  -6    1.33    0.49
  11  -1   6    1.46    0.59
  11  -1   6    1.61    0.47
 -11   2  -6    5.47    0.80
 -11   2  -6    6.19    0.69
  11  -2   6    4.49    0.60
  11  -2   6    6.43    0.80
 -11   3  -6    3.30    0.70
 -11   3  -6    3.35    0.63
  11  -3   6    2.37    0.74
 -11   4  -6    8.34    0.93
 -11   4  -6    9.26    1.01
  11  -4   6    8.81    1.05
 -11   5  -6    2.44    0.71
 -11   5  -6    1.54    0.82
  11  -5   6    2.79    0.87
 -11   6  -6    4.84    0.89
  11  -6   6    4.41    1.07
 -12  -6  -6    2.43    0.96
  12   6   6    2.70    1.07
 -12  -5  -6    1.46    0.77
  12   5   6    2.30    0.94
 -12  -4  -6    1.95    0.73
  12   4   6    1.48    1.29
  12   4   6   -0.31    0.82
 -12  -3  -6   10.18    1.38
  12   3   6    9.41    1.52
  12   3   6    9.44    1.06
 -12  -2  -6   11.23    1.26
  12   2   6    7.98    1.25
  12   2   6    8.02    0.96
 -12  -1  -6   10.82    1.16
  12   1   6    8.83    1.13
  12   1   6    8.92    1.02
  12   1   6    8.42    0.92
 -12   0  -6   -0.03    0.69
  12   0   6   -0.45    0.46
  12   0   6    0.17    0.60
 -12   1  -6    8.42    0.92
 -12   1  -6    8.57    1.00
  12  -1   6    7.72    0.89
  12  -1   6    9.36    0.93
 -12   2  -6   10.36    1.02
 -12   2  -6   10.51    1.09
  12  -2   6    9.95    1.05
 -12   3  -6   10.66    1.10
 -12   3  -6   10.24    1.02
  12  -3   6   10.99    1.10
 -12   4  -6    1.35    0.75
 -12   4  -6    2.27    0.66
  12  -4   6    2.56    0.88
 -12   5  -6    2.48    0.74
 -12   5  -6    1.67    0.84
  12  -5   6    1.29    0.87
 -12   6  -6    0.92    0.80
  12  -6   6    1.99    1.01
 -13  -6  -6    1.08    0.96
  13   6   6    0.73    1.08
 -13  -5  -6    4.50    0.93
  13   5   6    3.93    1.05
  13   4   6    5.88    1.49
  13   4   6    4.51    0.96
 -13  -3  -6    6.57    1.29
  13   3   6    5.88    0.91
  13   3   6    5.28    1.44
 -13  -2  -6    7.32    1.23
  13   2   6    9.15    0.91
  13   2   6    6.93    0.93
  13   2   6    4.53    1.25
 -13  -1  -6   12.25    1.38
  13   1   6   14.70    1.25
  13   1   6   11.78    1.22
  13   1   6   12.53    1.42
 -13   0  -6    2.33    0.82
  13   0   6    2.76    0.74
  13   0   6    3.79    0.60
 -13   1  -6   13.10    1.12
 -13   1  -6   10.61    1.21
  13  -1   6   10.64    1.11
  13  -1   6   12.02    1.10
 -13   2  -6    7.88    1.04
 -13   2  -6    9.51    0.98
  13  -2   6    8.83    1.02
 -13   3  -6    9.85    0.98
 -13   3  -6    6.88    1.04
  13  -3   6    8.53    1.04
 -13   4  -6    6.22    0.84
 -13   4  -6    5.76    0.96
  13  -4   6    5.52    1.00
 -13   5  -6    3.01    0.83
 -13   5  -6    3.79    0.94
  13  -5   6    3.94    1.08
 -13   6  -6    3.10    0.85
  13  -6   6    1.86    1.01
 -14  -7  -6    0.34    0.99
  14   6   6    2.72    1.12
 -14  -5  -6    1.48    0.88
  14   5   6    1.16    1.01
  14   4   6    4.85    1.06
 -14  -3  -6    2.36    1.20
  14   3   6    1.33    1.24
  14   3   6    2.51    0.86
 -14  -2  -6    0.54    1.08
  14   2   6    3.36    0.68
  14   2   6    2.15    0.78
  14   2   6    2.00    1.18
 -14  -1  -6    1.99    0.97
  14   1   6    3.79    0.99
  14   1   6    3.11    0.74
  14   1   6    3.45    0.80
 -14   0  -6    9.18    1.10
  14   0   6    6.84    0.81
  14   0   6    8.10    0.98
 -14   1  -6    3.82    0.66
 -14   1  -6    3.16    0.86
  14  -1   6    2.79    0.79
 -14   2  -6    3.67    0.68
 -14   2  -6    1.15    0.83
  14  -2   6    2.93    0.82
 -14   3  -6    1.34    0.87
 -14   3  -6    3.74    0.72
  14  -3   6    3.79    0.94
 -14   4  -6    5.83    1.03
 -14   4  -6    4.76    0.86
  14  -4   6    5.54    1.07
 -14   5  -6    3.97    1.01
 -14   5  -6    1.63    0.82
 -14   6  -6    2.29    0.89
  14  -6   6    1.59    1.07
 -15  -5  -6   -0.60    0.86
  15   5   6    2.83    1.09
  15   4   6    3.22    1.61
  15   4   6    2.91    1.04
 -15  -3  -6   -0.07    1.27
  15   3   6    0.93    0.88
  15   3   6    1.43    1.30
 -15  -2  -6    1.49    1.19
  15   2   6    0.93    1.24
  15   2   6    1.38    0.80
  15   2   6    1.78    0.69
 -15  -1  -6    0.04    0.97
  15   1   6    1.56    0.83
  15   1   6    2.82    0.72
  15   1   6    0.39    0.97
 -15   0  -6    0.49    0.90
  15   0   6    1.05    0.78
  15   0   6    0.25    0.86
 -15   1  -6    1.30    0.84
 -15   1  -6    2.03    0.66
  15  -1   6    2.03    0.81
 -15   2  -6    0.09    0.65
 -15   2  -6    0.44    0.85
  15  -2   6    0.44    0.83
 -15   3  -6    0.14    0.89
 -15   3  -6    1.62    0.72
  15  -3   6    1.03    0.92
 -15   4  -6    3.85    1.04
 -15   4  -6    5.64    0.87
  15  -4   6    4.10    1.12
 -15   5  -6    1.00    0.81
  16   5   6    1.70    1.12
  16   4   6    3.32    1.08
  16   3   6    4.77    1.56
  16   3   6    4.67    1.10
 -16  -2  -6    3.37    1.41
  16   2   6    6.49    1.53
  16   2   6    5.79    1.06
  16   2   6    6.57    0.94
 -16  -1  -6    4.79    1.24
  16   1   6    6.56    1.04
  16   1   6    4.58    1.25
  16   1   6    5.19    0.81
 -16   0  -6    1.08    1.04
  16   0   6    0.84    0.98
  16   0   6    4.04    0.92
 -16   1  -6    5.13    0.82
 -16   1  -6    4.78    1.06
  16  -1   6    7.81    1.04
 -16   2  -6    5.50    0.88
 -16   2  -6    5.36    1.07
  16  -2   6    8.48    1.11
 -16   3  -6    5.91    1.09
 -16   3  -6    4.92    0.91
  16  -3   6    6.10    1.15
 -16   4  -6    4.05    0.87
  16  -4   6    4.54    1.17
 -16   5  -6    1.10    0.89
  16  -5   6    1.51    1.17
 -16   6  -6    1.05    0.93
  17   5   6    1.07    1.16
  17   4   6    2.25    1.10
 -17  -3  -6    1.15    1.51
  17   3   6    3.18    1.09
 -17  -2  -6    0.59    1.40
  17   2   6    2.68    0.88
  17   2   6    2.61    1.01
 -17  -1  -6   16.15    1.89
  17   1   6   15.06    1.50
 -17   0  -6    0.00    1.10
  17   0   6    0.89    0.93
  17   0   6   -0.27    1.08
 -17   1  -6   16.07    1.69
 -17   1  -6   16.32    1.42
  17  -1   6   14.32    1.45
 -17   2  -6    3.89    0.83
  17  -2   6    3.85    1.07
 -17   3  -6    2.41    0.84
  17  -3   6    2.14    1.08
 -17   4  -6    2.58    0.88
  17  -4   6    2.01    1.16
 -17   5  -6    1.39    0.88
 -17   6  -6    0.99    0.94
  18   4   6    0.83    1.19
  18   3   6    1.05    1.11
 -18  -2  -6    0.31    1.41
  18   2   6   -1.04    0.97
 -18  -1  -6   -0.69    1.28
  18   1   6    0.57    1.02
  18   1   6    1.62    1.33
  18   0   6   10.39    1.33
 -18   1  -6    0.12    0.68
  18  -1   6    1.14    0.99
  18  -1   6    1.88    1.08
 -18   2  -6    0.16    0.78
  18  -2   6    1.12    1.03
 -18   3  -6    0.66    0.84
  18  -3   6    3.43    1.16
 -18   4  -6    1.59    0.89
  18  -4   6    3.20    1.22
 -18   5  -6    1.63    0.95
  19   4   6    2.47    1.23
  19   3   6   -1.15    1.18
  19   2   6    1.03    1.14
 -19  -1  -6    0.48    1.40
  19   1   6    1.78    1.09
 -19   0  -6    2.20    1.26
  19   0   6    2.03    1.11
 -19   1  -6    0.97    0.75
  19  -1   6    1.76    1.07
 -19   2  -6    1.49    0.86
  19  -2   6    2.20    1.10
 -19   3  -6    0.37    0.86
  19  -3   6    0.69    1.16
 -19   4  -6    2.99    0.98
  19  -4   6    3.44    1.27
  20   4   6    2.10    1.26
  20   3   6    1.02    1.26
  20   2   6    4.11    1.23
  20   1   6    3.81    1.25
  20   0   6    3.47    1.23
  20  -1   6    7.00    1.30
 -20   2  -6    2.93    0.94
  20  -2   6    5.32    1.24
 -20   3  -6    0.58    0.87
  20  -3   6    1.00    1.21
 -20   4  -6   -0.11    0.94
  20  -4   6    1.03    1.29
  21   3   6    2.99    1.33
  21   2   6    3.48    1.27
  21   1   6    4.38    1.27
  21   0   6    2.76    1.23
  21  -1   6    5.17    1.29
  21  -2   6    2.47    1.21
 -21   3  -6   -1.39    0.89
  21  -3   6    2.68    1.28
  22   1   6   -0.77    1.21
  22   0   6    3.28    1.31
  22  -1   6   -0.32    1.21
 -22   1   7    0.20    0.94
  22   0  -7    2.42    1.03
  22   1  -7    0.34    1.02
 -21   3   7    0.30    0.95
 -21   2   7    1.36    0.94
  21  -1  -7    4.12    1.03
 -21   1   7    3.64    0.99
  21   0  -7    0.74    0.99
  21   1  -7    2.52    1.04
  21   2  -7    2.73    1.12
  21   3  -7    2.58    1.19
 -20   3   7   -0.01    0.90
 -20   2   7    2.81    0.99
  20  -1  -7    3.07    0.96
 -20   1   7    2.14    0.88
  20   0  -7    5.07    1.04
  20   1  -7    2.93    1.01
  20   2  -7    2.33    1.09
  20   3  -7    1.07    1.10
 -19   4   7    2.33    0.96
 -19   3   7    1.67    0.89
 -19   2   7    1.15    0.91
  19  -1  -7    3.35    0.93
 -19   1   7    3.27    0.90
  19   0  -7    5.90    1.03
  19   1  -7    1.56    0.93
  19   2  -7    3.36    1.08
  19   3  -7    0.92    1.07
  19   4  -7    1.23    1.12
 -18   4   7    2.57    0.90
 -18   3   7    1.34    0.85
 -18   2   7    0.70    0.86
  18  -1  -7    1.34    0.82
 -18   1   7    1.04    0.81
  18   0  -7    2.94    0.89
  18   1  -7    1.07    0.85
  18   2  -7    1.14    0.97
  18   3  -7    3.15    1.08
  18   4  -7    1.84    1.08
 -17   5   7    2.60    0.91
 -17   4   7    2.46    0.84
 -17   3   7    4.31    0.89
 -17   2   7    3.17    0.84
  17  -1  -7   10.81    1.13
 -17   1   7   11.04    1.25
  17   0  -7    2.68    0.84
 -17   0   7    3.40    0.78
  17   1  -7    8.83    1.07
  17   2  -7    6.33    1.07
  17   3  -7    6.25    1.11
  17   4  -7    1.56    1.06
 -17  -4   7    2.44    0.95
 -17  -5   7    0.56    0.96
 -16   5   7    1.15    0.87
 -16   4   7    2.46    0.81
 -16   3   7    3.65    0.83
 -16   2   7    9.19    1.05
  16  -1  -7    8.88    0.97
 -16   1   7    8.14    1.03
  16   0  -7   12.91    1.18
 -16   0   7   13.15    1.30
  16   1  -7    4.65    1.38
  16   1  -7   10.33    1.05
  16   2  -7    9.14    1.67
  16   2  -7    8.84    1.12
  16   3  -7    2.92    0.97
  16   4  -7    2.29    0.96
 -16  -4   7    1.96    0.90
 -15   6   7    2.47    0.88
 -15   5   7    1.29    0.82
 -15   4   7    4.58    0.83
 -15   3   7    5.86    0.86
 -15   2   7    2.07    0.71
  15  -1  -7    2.66    0.69
 -15   1   7    2.00    0.70
  15   0  -7   10.39    1.03
  15   0  -7   10.31    1.30
 -15   0   7   10.26    1.13
  15   1  -7    2.29    0.74
  15   1  -7   -0.25    1.18
  15   2  -7    3.07    0.83
  15   2  -7    1.95    1.31
  15   3  -7    6.92    1.62
  15   3  -7    6.86    1.05
 -15  -3   7    7.24    0.97
  15   4  -7    6.29    1.03
 -15  -4   7    5.15    0.99
 -15  -5   7   -0.30    0.96
 -14   4   7    5.59    0.85
  14  -3  -7    3.47    0.81
 -14   3   7    3.53    0.70
  14  -2  -7    9.38    0.93
 -14   2   7    8.86    0.96
  14  -1  -7    4.34    0.72
 -14   1   7    4.94    0.76
  14   0  -7    2.84    0.79
  14   0  -7    5.56    0.74
  14   0  -7    4.04    0.94
 -14   0   7    4.27    0.89
 -14   0   7    5.94    0.76
  14   1  -7    4.33    1.10
  14   1  -7    5.90    0.81
  14   2  -7    7.55    1.42
  14   2  -7    9.98    1.02
  14   3  -7    3.23    0.86
  14   3  -7    3.04    1.40
 -14  -3   7    3.98    0.79
  14   4  -7    6.79    1.02
 -14  -4   7    5.66    0.97
  14   5  -7    0.83    1.00
 -14  -5   7    1.22    0.91
 -14  -6   7    1.26    0.99
 -13   4   7    6.24    0.82
  13  -3  -7   19.35    1.41
 -13   3   7   18.16    1.48
  13  -2  -7   13.88    1.15
 -13   2   7   13.01    1.25
 -13   2   7   15.91    1.15
  13  -1  -7   19.33    1.43
 -13   1   7   21.44    1.47
 -13   1   7   20.48    1.65
  13   0  -7   24.86    2.06
  13   0  -7   27.76    1.83
  13   0  -7   26.22    2.10
  13   0  -7   27.65    1.82
 -13   0   7   27.88    2.03
 -13   0   7   25.72    1.80
 -13   0   7   28.53    2.14
  13   1  -7   21.54    1.51
  13   1  -7   18.87    1.80
  13   2  -7   16.53    1.80
  13   2  -7   18.00    1.38
  13   3  -7   19.11    1.54
  13   3  -7   24.25    2.10
 -13  -3   7   19.81    1.51
  13   4  -7    4.54    0.92
 -13  -4   7    6.65    0.93
  13   5  -7    4.15    1.03
 -13  -5   7    6.07    0.99
  13   6  -7    1.89    1.04
 -13  -6   7    2.83    1.01
  12  -3  -7    4.11    0.76
 -12   3   7    5.97    0.69
  12  -2  -7    7.62    0.82
 -12   2   7    7.97    0.89
 -12   2   7    8.28    0.80
  12  -1  -7    4.23    0.62
 -12   1   7    4.39    0.62
 -12   1   7    4.60    0.67
  12   0  -7    1.51    0.53
  12   0  -7    0.75    0.64
  12   0  -7    1.20    0.51
  12   0  -7    1.37    0.75
 -12   0   7   -0.35    0.70
 -12   0   7    0.04    0.54
 -12   0   7    0.98    0.46
  12   1  -7    2.59    0.62
  12   1  -7    2.35    0.92
  12   1  -7    4.91    0.67
 -12  -1   7    3.44    0.59
  12   2  -7    5.75    1.20
  12   2  -7    6.00    0.80
  12   2  -7    5.65    0.77
 -12  -2   7    6.51    0.76
  12   3  -7    3.30    0.77
  12   3  -7    3.69    1.33
 -12  -3   7    4.15    0.76
  12   4  -7    7.09    1.75
  12   4  -7    6.97    0.93
 -12  -4   7    4.60    0.89
  12   5  -7    2.14    0.90
 -12  -5   7    2.81    0.87
  12   6  -7    2.78    1.04
 -12  -6   7    0.71    0.96
 -12  -7   7    0.97    1.02
  11  -3  -7    5.93    0.77
 -11   3   7    5.65    0.69
  11  -2  -7    4.11    0.62
 -11   2   7    3.68    0.60
 -11   2   7    4.60    0.61
  11  -1  -7    2.41    0.52
 -11   1   7    3.05    0.56
 -11   1   7    3.50    0.54
  11   0  -7    3.23    0.52
  11   0  -7    5.18    0.77
  11   0  -7    4.56    0.58
  11   0  -7    4.07    0.57
 -11   0   7    4.20    0.62
 -11   0   7    4.23    0.53
 -11   0   7    3.95    0.76
  11   1  -7    3.94    0.62
  11   1  -7    3.13    0.90
  11   1  -7    3.49    0.68
  11   1  -7    4.77    0.63
 -11  -1   7    4.31    0.58
  11   2  -7    3.04    0.64
  11   2  -7    3.01    0.60
  11   2  -7    5.45    1.09
 -11  -2   7    3.10    0.61
  11   3  -7    6.22    1.34
  11   3  -7    4.58    0.80
 -11  -3   7    5.01    0.75
  11   4  -7    5.11    1.68
  11   4  -7    7.49    0.89
 -11  -4   7    5.20    0.84
  11   5  -7    1.67    0.85
  11   5  -7    1.18    1.70
 -11  -5   7    1.11    0.77
  11   6  -7    2.01    0.97
 -11  -6   7    3.48    0.95
  10  -4  -7    3.51    0.76
  10  -3  -7    0.96    0.61
 -10   3   7    1.21    0.50
  10  -2  -7    4.50    0.64
 -10   2   7    7.50    0.71
 -10   2   7    6.37    0.66
  10  -1  -7    6.98    0.72
 -10   1   7    9.90    0.75
 -10   1   7    9.06    0.85
  10   0  -7    5.35    0.59
  10   0  -7    5.02    0.58
  10   0  -7    7.35    0.80
  10   0  -7    5.36    0.61
 -10   0   7    5.42    0.56
 -10   0   7    5.01    0.78
 -10   0   7    4.74    0.63
  10   1  -7    8.16    0.87
  10   1  -7    7.54    0.73
  10   1  -7    7.91    0.74
  10   1  -7    7.98    1.05
 -10  -1   7    6.03    0.98
 -10  -1   7    7.00    0.73
  10   2  -7    3.38    0.69
  10   2  -7    4.60    0.65
  10   2  -7    4.80    1.07
 -10  -2   7    4.60    0.63
 -10  -2   7    4.17    0.64
  10   3  -7    1.03    0.62
  10   3  -7    2.29    1.18
 -10  -3   7    0.96    0.59
  10   4  -7    6.17    1.45
  10   4  -7    6.41    0.86
 -10  -4   7    5.58    0.80
  10   5  -7    4.50    0.90
  10   5  -7    2.67    1.67
 -10  -5   7    4.38    0.86
  10   6  -7    3.30    0.98
 -10  -6   7    2.44    0.87
  10   8  -7    1.46    1.19
 -10  -8   7    1.49    1.05
   9  -4  -7    9.48    0.97
   9  -3  -7   23.76    1.55
  -9   3   7   21.41    1.51
   9  -2  -7   13.38    0.98
  -9   2   7   12.95    1.06
  -9   2   7   14.18    0.97
   9  -1  -7   37.94    2.34
  -9   1   7   38.16    2.36
  -9   1   7   36.00    2.62
   9   0  -7   21.60    1.54
   9   0  -7   20.46    1.40
   9   0  -7   21.93    1.62
  -9   0   7   21.93    1.59
  -9   0   7   21.19    1.66
  -9   0   7   19.30    1.38
   9   1  -7   41.71    3.06
   9   1  -7   40.93    2.63
   9   1  -7   40.16    2.63
   9   1  -7   43.61    2.94
  -9  -1   7   44.13    3.06
  -9  -1   7   40.81    2.63
   9   2  -7   13.17    1.08
   9   2  -7   12.54    1.06
   9   2  -7   13.81    1.43
  -9  -2   7   15.90    1.06
   9   3  -7   31.52    2.32
   9   3  -7   24.34    1.78
  -9  -3   7   25.73    1.76
   9   4  -7   11.94    1.69
   9   4  -7   11.11    1.02
  -9  -4   7   10.33    1.00
   9   5  -7    9.31    1.78
   9   5  -7    7.75    1.07
  -9  -5   7   10.50    1.01
   9   6  -7    3.33    0.95
  -9  -6   7    2.56    0.90
   9   7  -7    3.61    1.06
  -9  -7   7    3.65    1.03
   8  -4  -7    4.81    0.76
   8  -3  -7    6.51    0.72
  -8   3   7    7.09    0.67
   8  -2  -7    8.92    0.75
  -8   2   7    9.41    0.72
  -8   1   7    7.20    0.76
   8   0  -7   21.15    1.73
   8   0  -7   23.05    1.66
  -8   0   7   23.87    1.77
  -8   0   7   24.17    1.70
   8   1  -7    7.65    0.82
   8   1  -7    6.47    0.95
   8   1  -7    7.30    0.70
   8   1  -7    6.85    0.66
  -8  -1   7    6.77    0.65
  -8  -1   7    7.53    0.92
  -8  -1   7    6.91    0.68
   8   2  -7    7.34    1.12
   8   2  -7    7.36    0.74
   8   2  -7    7.18    0.76
  -8  -2   7    8.51    0.74
   8   3  -7    5.86    1.19
   8   3  -7    8.13    0.79
  -8  -3   7    6.95    0.74
   8   4  -7    5.96    0.79
   8   4  -7    5.28    1.37
  -8  -4   7    5.36    0.76
   8   5  -7    4.27    1.51
   8   5  -7    4.24    0.83
  -8  -5   7    2.82    0.78
   8   6  -7    1.99    0.90
  -8  -6   7    1.81    0.83
   8   7  -7    2.02    1.03
  -8  -7   7    1.73    0.95
  -7   7   7    0.24    0.82
   7  -5  -7    2.08    0.75
   7  -4  -7    3.14    0.69
   7  -3  -7   10.26    0.86
  -7   3   7   10.17    0.81
   7  -2  -7    2.33    0.46
  -7   2   7    3.61    0.44
  -7   1   7    2.83    0.44
   7   0  -7    0.39    0.51
   7   0  -7    1.28    0.35
   7   0  -7    0.88    0.50
  -7   0   7    1.45    0.57
  -7   0   7    0.96    0.42
   7   1  -7    2.87    0.54
   7   1  -7    4.28    0.51
   7   1  -7    2.46    0.77
   7   1  -7    3.81    0.48
  -7  -1   7    4.36    0.76
  -7  -1   7    3.95    0.48
  -7  -1   7    3.56    0.48
   7   2  -7    2.08    0.61
   7   2  -7    1.88    0.87
   7   2  -7    1.83    0.49
   7   2  -7    1.14    0.52
  -7  -2   7    2.10    0.48
   7   3  -7    8.67    0.84
   7   3  -7   10.78    1.29
  -7  -3   7   10.49    0.87
   7   4  -7    4.78    0.76
   7   4  -7    4.36    1.25
  -7  -4   7    5.08    0.74
   7   5  -7    3.19    0.79
   7   5  -7    3.26    1.48
  -7  -5   7    2.77    0.73
   7   6  -7    2.49    0.90
  -7  -6   7    2.70    0.83
   7   7  -7    2.68    1.07
  -7  -7   7    3.44    0.97
  -6   7   7    0.26    0.92
  -6   6   7    2.26    0.82
   6  -5  -7    1.72    0.73
   6  -5  -7    0.64    0.76
  -6   5   7    1.15    0.89
   6  -4  -7    6.85    0.79
  -6   4   7    6.81    0.75
   6  -3  -7    6.87    0.68
  -6   3   7    6.39    0.65
   6  -2  -7    3.02    0.44
   6   0  -7   18.67    1.40
   6   0  -7   19.38    1.36
   6   0  -7   16.87    1.33
  -6   0   7   17.71    1.37
  -6   0   7   19.69    1.41
   6   1  -7    1.99    0.43
   6   1  -7    1.24    0.42
   6   1  -7    2.08    0.38
   6   1  -7    0.51    0.63
  -6  -1   7    0.72    0.61
  -6  -1   7    1.84    0.37
   6   2  -7   -0.35    0.82
   6   2  -7    1.99    0.57
   6   2  -7    2.98    0.50
   6   2  -7    2.43    0.53
  -6  -2   7    3.00    0.49
   6   3  -7    6.33    0.75
   6   3  -7    6.83    0.73
   6   3  -7    6.70    0.83
   6   3  -7    7.31    1.11
  -6  -3   7    7.61    0.73
   6   4  -7    8.81    1.26
  -6  -4   7    6.57    0.76
  -6  -4   7    5.37    0.82
   6   5  -7    3.62    1.30
  -6  -5   7    3.95    0.75
  -6  -6   7    2.42    0.82
  -6  -7   7    0.78    0.90
  -6  -8   7    1.23    0.98
   5  -6  -7    1.37    0.81
  -5   6   7    3.37    0.90
   5  -5  -7    4.28    0.95
   5  -5  -7    7.50    0.89
  -5   5   7    6.21    1.06
  -5   5   7    5.67    0.91
   5  -4  -7   10.45    0.94
   5  -4  -7   10.38    1.01
  -5   4   7   11.32    0.89
  -5   4   7    9.34    1.06
   5  -3  -7    6.71    0.68
  -5   3   7    7.00    0.66
   5  -2  -7    5.84    0.56
  -5   2   7    5.39    0.52
   5   0  -7   56.04    3.84
  -5   0   7   52.07    3.77
  -5   0   7   58.41    3.84
   5   1  -7   20.29    1.68
   5   1  -7   22.75    1.68
   5   1  -7   20.81    1.41
   5   1  -7   24.08    1.62
   5   1  -7   21.57    1.42
  -5  -1   7   23.10    1.69
  -5  -1   7   22.11    1.40
   5   2  -7    5.55    0.63
   5   2  -7    6.03    0.70
   5   2  -7    4.51    0.88
  -5  -2   7    6.50    0.60
  -5  -2   7    5.58    0.66
   5   3  -7    7.21    0.76
   5   3  -7    7.84    1.08
   5   3  -7    6.75    0.82
  -5  -3   7    7.21    0.73
  -5  -3   7    6.36    0.77
   5   4  -7   12.69    1.23
   5   4  -7   17.92    1.56
  -5  -4   7   11.92    1.04
  -5  -4   7   11.29    1.19
   5   5  -7    7.47    1.38
  -5  -5   7    7.45    0.90
  -5  -6   7    4.04    0.87
  -5  -7   7    2.26    0.97
  -5  -8   7    1.65    1.01
  -4   7   7    1.71    1.13
   4  -6  -7    3.98    0.85
  -4   6   7    1.67    0.94
   4  -5  -7    1.82    0.70
  -4   5   7    2.16    0.98
  -4   5   7    2.91    0.89
   4  -4  -7   -0.67    0.54
   4  -4  -7   -0.50    0.49
   4  -4  -7    0.46    0.56
  -4   4   7   -0.09    0.52
  -4   4   7    1.87    0.69
  -4   4   7   -0.41    0.66
   4  -3  -7    6.72    0.67
  -4   3   7    6.64    0.66
   4  -2  -7   18.49    1.19
  -4   2   7   17.52    1.17
   4   0  -7   -0.78    0.34
  -4   0   7    0.06    0.30
  -4   0   7   -0.24    0.33
  -4   0   7    0.04    0.29
   4   1  -7    9.87    0.81
   4   1  -7    9.12    0.67
   4   1  -7    7.04    0.89
   4   1  -7    8.68    0.77
  -4  -1   7    9.34    0.65
  -4  -1   7    8.04    0.86
   4   2  -7   17.18    1.49
   4   2  -7   22.26    1.48
   4   2  -7   17.79    1.30
   4   2  -7   16.11    1.59
  -4  -2   7   19.92    1.27
  -4  -2   7   18.36    1.58
  -4  -2   7   20.85    1.49
   4   3  -7    7.72    1.03
   4   3  -7    7.49    0.83
   4   3  -7    7.68    0.76
  -4  -3   7    7.33    0.82
  -4  -3   7    6.76    0.73
[truncated: 486,246 more chars]
